# Supplementary material for: Multivalency, autoinhibition, and protein disorder in the regulation of interactions of dynein intermediate chain with dynactin and the nuclear distribution protein
Source: eLife journal article supplement (doi:10.7554/elife.80217), 2022-11-23
Supplement: fig2-data1 [file Figure 2-source data1.xlsx]

## Sheet: SV-AUC
	LC8	Tctex	LC7	IC260	p150CC1B	NudECC
0	0.00473	0.00523	0.00484	0.00514	0.0023	0.00557
0.152	0.0109	7.27e-06	0.0453	0.549	0.284	1.26
0.303	5.25e-05	3.55e-11	0.000133	0.00203	0.0326	0.0601
0.455	1.94e-07	1.11e-14	1.28e-08	6.97e-08	0.00101	6.21e-05
0.606	5.99e-10	4.33e-14	1.24e-13	2e-13	5.2e-06	3.4e-09
0.758	2.65e-12	1.13e-14	4.93e-14	1.19e-14	6.29e-09	3.92e-14
0.909	3.98e-14	1.68e-14	1.96e-14	5.21e-14	5.24e-12	6.81e-15
1.06	1.32e-14	7.43e-15	3.9e-14	4.49e-14	3.81e-14	4.36e-14
1.21	1.2e-14	1.3e-14	6.58e-14	5.3e-14	1.61e-14	7.72e-15
1.36	1.11e-13	6.48e-14	2.45e-14	7.59e-15	1.65e-14	1.31e-14
1.52	2.34e-11	9.13e-15	7.54e-15	1.78e-14	2.17e-14	3.24e-14
1.67	2.05e-08	5.23e-14	1.15e-14	8.08e-11	1.94e-11	1.02e-14
1.82	2.33e-05	1.25e-14	1.03e-15	7.55e-06	8.97e-08	1.78e-14
1.97	0.0101	2.28e-12	1.16e-08	0.0466	0.000356	5.03e-12
2.12	0.635	1.92e-08	0.000184	4.1	0.184	2.14e-06
2.27	3.58	6.05e-05	0.146	2.44	2.45	0.0388
2.42	1.97	0.0297	3.26	0.0108	0.287	4.47
2.58	0.192	1.26	2.33	8.01e-07	0.0002	1.36
2.73	0.00815	4.05	0.107	3.49e-12	1.13e-09	0.00147
2.88	0.00038	1.37	0.00089	2.5e-14	4.94e-14	2.02e-08
3.03	4.03e-05	0.101	4.12e-06	2.03e-14	2.15e-14	4.21e-14
3.18	1.44e-05	0.00427	2.79e-08	1.06e-14	4.52e-14	4.56e-14
3.33	1.76e-05	0.00026	5.55e-10	2.72e-14	2.78e-14	1.41e-14
3.48	5.65e-05	4.54e-05	4.7e-11	1e-14	4.63e-14	9.81e-15
3.64	0.000308	3.15e-05	1.84e-11	8.83e-15	1.75e-14	5.17e-14
3.79	0.00178	8.11e-05	2.86e-11	1.72e-14	1.09e-14	7.57e-15
3.94	0.00717	0.000519	1.36e-10	6.99e-15	1.25e-14	8.77e-15
4.09	0.0147	0.00472	1.35e-09	7.64e-15	2.26e-14	5.27e-14
4.24	0.0132	0.033	2.03e-08	1.8e-14	5.44e-14	4.83e-14
4.39	0.00487	0.106	3.45e-07	6.26e-14	1.79e-14	1.32e-14
4.55	0.000782	0.112	5.22e-06	3.02e-14	7.22e-15	5.02e-14
4.7	6.22e-05	0.0321	5.92e-05	1.57e-14	4.29e-14	1e-14
4.85	2.86e-06	0.00258	0.000456	9.07e-15	3.26e-14	1.11e-14
5	9.02e-08	6.95e-05	0.00228	6.32e-14	3.13e-14	6.94e-15
5.15	2.31e-09	7.9e-07	0.00745	3.07e-14	3.64e-14	8.43e-13
5.3	5.54e-11	4.95e-09	0.0165	2.41e-14	4.86e-14	2.11e-10
5.45	1.43e-12	2.37e-11	0.0261	1.61e-14	7.1e-15	2.28e-08
5.61	4.26e-14	1.08e-13	0.0319	1.26e-14	1.21e-14	1.08e-06
5.76	6.18e-14	8.06e-15	0.032	1.08e-14	2.1e-14	2.35e-05
5.91	6.35e-14	2.94e-14	0.0284	1.11e-14	3.64e-14	0.000254
6.06	8.06e-15	1.59e-14	0.0235	1.01e-14	6.22e-14	0.00149
6.21	1.4e-14	1.51e-14	0.0191	9.86e-15	1.04e-14	0.00524
6.36	3.1e-14	1.8e-14	0.0156	1.01e-14	1.96e-14	0.0121
6.52	8.14e-15	3.41e-14	0.0133	1.2e-13	3.53e-14	0.0198
6.67	3.08e-14	6.68e-15	0.0119	1.97e-12	6.08e-14	0.0252
6.82	1.4e-14	1.86e-14	0.0113	2.51e-11	1.01e-14	0.0265
6.97	8.18e-15	5.84e-14	0.0112	2.53e-10	1.89e-14	0.0245
7.12	6.43e-14	2.5e-14	0.0116	2.06e-09	3.36e-14	0.0209
7.27	6.67e-15	1.29e-14	0.0124	1.38e-08	5.67e-14	0.017
7.42	8.88e-15	8.34e-15	0.0135	7.64e-08	9.16e-15	0.0137
7.58	1.42e-14	7.11e-15	0.0147	3.58e-07	1.69e-14	0.011
7.73	2.54e-14	8.02e-15	0.016	1.43e-06	2.93e-14	0.00897
7.88	4.75e-14	1.14e-14	0.0172	4.97e-06	4.82e-14	0.00749
8.03	9.13e-15	1.92e-14	0.0182	1.5e-05	7.61e-15	0.00645
8.18	1.96e-14	3.6e-14	0.019	3.96e-05	1.37e-14	0.00571
8.33	4.01e-14	7.11e-15	0.0195	9.31e-05	2.32e-14	0.00519
8.48	7.77e-15	1.69e-14	0.0196	0.000195	3.74e-14	0.00485
8.64	1.71e-14	3.93e-14	0.0196	0.000368	5.78e-14	0.00462
8.79	3.48e-14	9.37e-15	0.0193	0.00063	8.64e-15	0.00447
8.94	6.67e-15	2.42e-14	0.0189	0.000986	1.47e-14	0.00438
9.09	1.47e-14	5.78e-14	0.0184	0.00142	2.37e-14	0.00435
9.24	3.03e-14	1.29e-14	0.0178	0.00191	3.67e-14	0.00433
9.39	5.94e-14	3.44e-14	0.0171	0.00239	5.47e-14	0.00433
9.55	1.12e-14	8.45e-15	0.0163	0.00283	7.92e-15	0.00433
9.7	2.61e-14	2.44e-14	0.0154	0.00316	1.3e-14	0.00432
9.85	5.76e-14	6.29e-14	0.0144	0.0034	2.03e-14	0.0043
10	1.23e-14	1.62e-14	0.0135	0.0035	3.06e-14	0.00426
10.2	3.35e-14	4.7e-14	0.0124	0.00348	4.46e-14	0.00419
10.3	9.61e-15	1.32e-14	0.0114	0.00337	6.33e-14	0.0041
10.5	2.93e-14	4.16e-14	0.0105	0.00318	8.77e-15	0.00398
10.6	9.41e-14	1.13e-14	0.00952	0.00295	1.37e-14	0.00384
10.8	3.17e-13	3.83e-14	0.00862	0.0027	2.05e-14	0.00368
10.9	1.11e-12	1.19e-14	0.00777	0.00245	2.98e-14	0.00349
11.1	3.98e-12	3.89e-14	0.00698	0.00222	4.2e-14	0.00328
11.2	1.44e-11	6.49e-16	0.00628	0.00201	5.8e-14	0.00307
11.4	5.17e-11	8.87e-14	0.00558	0.00183	7.84e-15	0.00284
11.5	1.82e-10	2.29e-13	0.005	0.00168	1.19e-14	0.00261
11.7	6.17e-10	5.32e-13	0.00443	0.00156	1.73e-14	0.00239
11.8	2.02e-09	1.13e-12	0.00392	0.00146	2.46e-14	0.00217
12	6.18e-09	2.28e-12	0.00351	0.00141	3.42e-14	0.00197
12.1	1.78e-08	4.39e-12	0.00314	0.00136	4.65e-14	0.0018
12.3	4.8e-08	8.25e-12	0.00284	0.00135	6.2e-14	0.00164
12.4	1.21e-07	1.57e-11	0.00259	0.00136	8.15e-15	0.00151
12.6	2.83e-07	3.05e-11	0.00241	0.0014	1.19e-14	0.00142
12.7	6.23e-07	6.18e-11	0.00228	0.00146	1.69e-14	0.00136
12.9	1.3e-06	1.32e-10	0.0022	0.00156	2.35e-14	0.00133
13	2.55e-06	3.05e-10	0.00216	0.00169	3.18e-14	0.00134
13.2	4.83e-06	7.54e-10	0.0022	0.00188	4.24e-14	0.0014
13.3	8.92e-06	2.02e-09	0.00226	0.00211	5.55e-14	0.00151
13.5	1.6e-05	5.86e-09	0.0024	0.00244	7.15e-15	0.00171
13.6	2.85e-05	1.85e-08	0.00258	0.00288	1.02e-14	0.00203
13.8	5.06e-05	6.3e-08	0.00287	0.00345	1.41e-14	0.00251
13.9	9.09e-05	2.35e-07	0.00325	0.00425	1.92e-14	0.00328
14.1	0.000165	9.5e-07	0.00372	0.0053	2.55e-14	0.00449
14.2	0.000307	4.23e-06	0.00439	0.00683	3.33e-14	0.00648
14.4	0.000587	2.02e-05	0.00524	0.00896	4.3e-14	0.00987
14.5	0.00116	0.000106	0.00643	0.0119	5.46e-14	0.0158
14.7	0.0024	0.000601	0.00809	0.0164	6.85e-15	0.0268
14.8	0.00511	0.00364	0.0104	0.0229	9.44e-15	0.0479
15	0.0228	0.0472	0.0275	0.0647	2.55e-14	0.18

## Sheet: SE-AUC
p150 SE-AUC Data																NudE SE-AUC Data
10,000 rpm					14,000 rpm					18,000 rpm						10,000 rpm					14,000 rpm					18000 rpm
	Data	Fit	Residual			Data	Fit	Residual			Data	Fit	Residual				Data	Fit	Residual			Data	Fit	Residual			Data	Fit	Residual
6.319	0.0947119	0.109029	-0.0143174		6.326	0.0117641	0.0383273	-0.0265632		6.331	-0.00100382	0.011444	-0.0124479			6.32	0.178342	0.222807	-0.0444652		6.328	0.108062	0.119385	-0.0113229		6.323	-0.00638086	0.0454597	-0.0518406
6.325	0.0972119	0.111446	-0.0142336		6.329	0.0272641	0.03915	-0.011886		6.333	-0.000503821	0.0117087	-0.0122125			6.325	0.213642	0.226467	-0.0128244		6.33	0.108762	0.120898	-0.0121361		6.326	0.0251191	0.0468534	-0.0217342
6.328	0.105812	0.112675	-0.00686277		6.332	0.0384641	0.0399911	-0.00152704		6.339	0.00679618	0.0125414	-0.00574526			6.327	0.217042	0.227948	-0.010906		6.333	0.116462	0.123206	-0.00674392		6.33	0.0330191	0.0487822	-0.0157631
6.331	0.112612	0.113918	-0.00130622		6.335	0.0453641	0.0408509	0.00451313		6.34	0.00809618	0.0126861	-0.00458993			6.329	0.226542	0.22944	-0.00289795		6.336	0.119662	0.12556	-0.0058981		6.332	0.0399191	0.049778	-0.00985886
6.335	0.115712	0.115599	0.000113353		6.341	0.0338641	0.0426286	-0.00876452		6.343	-0.000603821	0.0131306	-0.0137344			6.332	0.227542	0.231698	-0.00415552		6.341	0.125462	0.12959	-0.00412747		6.336	0.0465191	0.0518345	-0.00531537
6.341	0.122212	0.118168	0.00404365		6.342	0.0422641	0.0429326	-0.000668505		6.348	0.0149962	0.0139078	0.00108841			6.336	0.234442	0.234745	-0.000302607		6.343	0.127662	0.131239	-0.00357709		6.339	0.0519191	0.0534357	-0.00151654
6.343	0.120412	0.119038	0.0013738		6.343	0.0395641	0.0432388	-0.00367474		6.352	0.0209962	0.0145638	0.00643239			6.341	0.233642	0.238614	-0.00497179		6.344	0.132262	0.132072	0.000189835		6.34	0.0533191	0.0539809	-0.000661797
6.346	0.127412	0.120356	0.00705636		6.348	0.0431641	0.0448042	-0.00164019		6.353	0.0239962	0.0147328	0.00926342			6.342	0.233042	0.239396	-0.00635377		6.349	0.129562	0.136322	-0.00675971		6.344	0.0493191	0.0562214	-0.00690222
6.351	0.129212	0.122585	0.00662645		6.349	0.0475641	0.0451243	0.00243973		6.358	0.0143962	0.0156086	-0.00121245			6.346	0.244942	0.242551	0.00239083		6.354	0.139462	0.140715	-0.00125316		6.347	0.0616191	0.0579659	0.00365321
6.355	0.123612	0.124401	-0.000788735		6.353	0.0442641	0.0464285	-0.00216444		6.361	0.0122962	0.0161599	-0.00386371			6.347	0.247442	0.243347	0.00409506		6.359	0.146962	0.145258	0.00170444		6.352	0.0586191	0.0610015	-0.00238235
6.359	0.133712	0.126244	0.0074678		6.356	0.0436641	0.0474322	-0.00376816		6.362	0.0176962	0.0163481	0.00134808			6.353	0.257042	0.248181	0.00886154		6.361	0.147162	0.147117	4.46007e-05		6.353	0.0623191	0.0616284	0.000690702
6.361	0.139612	0.127177	0.0124353		6.358	0.0485641	0.0481138	0.000450241		6.369	0.0137962	0.0177308	-0.00393459			6.356	0.260942	0.250636	0.0103064		6.364	0.152662	0.149954	0.00270784		6.356	0.0674191	0.0635503	0.00386882
6.364	0.145112	0.128589	0.016523		6.363	0.0609641	0.0498625	0.0111015		6.374	0.0198962	0.0187921	0.00110408			6.358	0.253242	0.252287	0.000955305		6.369	0.156662	0.15481	0.00185164		6.359	0.0683191	0.0655354	0.00278377
6.366	0.128912	0.12954	-0.000627684		6.366	0.0633641	0.0509433	0.0124208		6.377	0.0224962	0.0194603	0.00303593			6.366	0.263742	0.259008	0.00473379		6.372	0.158162	0.157803	0.000358971		6.361	0.0638191	0.0668949	-0.00307574
6.369	0.131812	0.13098	0.000832404		6.369	0.0529641	0.0520482	0.000915838		6.385	0.0219962	0.0213648	0.000631416			6.371	0.269742	0.263306	0.00643602		6.377	0.162662	0.162926	-0.000264386		6.365	0.0673191	0.0697036	-0.00238448
6.375	0.136012	0.13391	0.00210189		6.371	0.0552641	0.0527986	0.00246544		6.387	0.0186962	0.0218703	-0.00317415			6.375	0.266642	0.266799	-0.000156962		6.384	0.169162	0.170394	-0.00123187		6.368	0.0740191	0.0718913	0.00212779
6.377	0.137912	0.134902	0.00300981		6.374	0.0537641	0.0539453	-0.000181204		6.392	0.0242962	0.023189	0.00110715			6.379	0.271342	0.270342	0.0010006		6.389	0.174462	0.175947	-0.00148479		6.372	0.0702191	0.0749211	-0.00470193
6.379	0.133412	0.135902	-0.00249		6.378	0.0468641	0.0555143	-0.00865027		6.395	0.0149962	0.0240194	-0.00902321			6.384	0.276642	0.27484	0.00180189		6.39	0.180162	0.17708	0.00308206		6.374	0.0701191	0.0764859	-0.00636676
6.384	0.140112	0.138436	0.00167628		6.382	0.0573641	0.0571306	0.000233405		6.4	0.0272962	0.0254722	0.001824			6.389	0.281342	0.279419	0.00192328		6.395	0.187162	0.182862	0.00430056		6.379	0.0808191	0.0805498	0.000269299
6.386	0.136312	0.139463	-0.00315105		6.383	0.0583641	0.0575423	0.000821771		6.402	0.0283962	0.0260784	0.00231778			6.392	0.297042	0.282205	0.0148372		6.396	0.187862	0.184041	0.00382073		6.382	0.0892191	0.0830963	0.00612284
6.389	0.142712	0.141019	0.0016929		6.387	0.0709641	0.0592197	0.0117443		6.405	0.0247962	0.0270158	-0.0022196			6.4	0.287942	0.289781	-0.00183825		6.399	0.184762	0.187629	-0.0028668		6.384	0.0840191	0.0848407	-0.00082155
6.393	0.148212	0.143122	0.00508976		6.391	0.0602641	0.0609478	-0.000683732		6.411	0.0371962	0.0289962	0.00820002			6.402	0.298442	0.291708	0.00673425		6.403	0.197562	0.192526	0.00503561		6.386	0.0881191	0.0866235	0.00149567
6.395	0.148212	0.144186	0.00402586		6.393	0.0707641	0.0618313	0.00893277		6.417	0.0403962	0.0311264	0.00926974			6.409	0.304442	0.298563	0.00587972		6.405	0.200962	0.195025	0.00593684		6.391	0.0911191	0.0912541	-0.000135005
6.398	0.147812	0.145798	0.00201441		6.396	0.0708641	0.0631814	0.00768264		6.423	0.0328962	0.0334182	-0.000522049			6.412	0.301342	0.301553	-0.000210249		6.412	0.208462	0.204041	0.00442066		6.393	0.0987191	0.0931783	0.00554085
6.402	0.147412	0.147976	-0.000563655		6.397	0.0674641	0.0636382	0.00382585		6.429	0.0379962	0.035884	0.00211215			6.415	0.313642	0.304574	0.00906788		6.418	0.221262	0.212116	0.00914573		6.397	0.0946191	0.097155	-0.00253582
6.405	0.154312	0.149632	0.00468039		6.402	0.0633641	0.0659739	-0.0026098		6.434	0.0455962	0.0380815	0.00751467			6.418	0.315042	0.307629	0.00741375		6.422	0.226062	0.217685	0.00837746		6.399	0.0955191	0.0992094	-0.00369031
6.409	0.154612	0.15187	0.00274213		6.404	0.0744641	0.0669328	0.0075313		6.442	0.0433962	0.0418894	0.00150676			6.422	0.313142	0.311752	0.00139077		6.423	0.220462	0.2191	0.00136166		6.402	0.100519	0.102377	-0.00185756
6.412	0.161812	0.153572	0.00824039		6.41	0.0696641	0.0698968	-0.000232717		6.445	0.0463962	0.0434164	0.0029798			6.429	0.329442	0.319109	0.0103334		6.429	0.235462	0.2278	0.00766246		6.406	0.102719	0.106765	-0.00404571
6.417	0.154512	0.156452	-0.00194046		6.412	0.0693641	0.0709146	-0.00155058		6.447	0.0421962	0.044466	-0.00226983			6.432	0.323642	0.322318	0.00132388		6.433	0.235562	0.233799	0.00176321		6.409	0.116119	0.110185	0.00593458
6.42	0.165712	0.158208	0.00750385		6.414	0.0768641	0.0719478	0.00491624		6.453	0.0499962	0.047774	0.00222217			6.436	0.324742	0.326651	-0.00190898		6.437	0.245862	0.239963	0.00589883		6.41	0.114719	0.11135	0.00336943
6.421	0.162712	0.158798	0.00391404		6.419	0.0787641	0.0745993	0.00416475		6.458	0.0502962	0.0507232	-0.000426995			6.437	0.329542	0.327744	0.00179815		6.438	0.244362	0.241531	0.00283139		6.412	0.108519	0.113719	-0.00519959
6.427	0.160512	0.162386	-0.00187363		6.42	0.0803641	0.0751416	0.00522245		6.465	0.0492962	0.055169	-0.00587281			6.443	0.335942	0.334384	0.00155874		6.443	0.256062	0.24953	0.00653234		6.415	0.127319	0.117371	0.00994786
6.428	0.161812	0.162992	-0.0011798		6.424	0.0818641	0.0773518	0.00451225		6.471	0.0638962	0.0592971	0.00459913			6.444	0.337042	0.335504	0.00153834		6.448	0.258962	0.257806	0.00115654		6.42	0.130819	0.123733	0.00708602
6.432	0.172912	0.16544	0.0074717		6.427	0.0817641	0.0790534	0.00271065		6.478	0.0703962	0.0645157	0.00588047			6.448	0.342142	0.340026	0.00211666		6.45	0.254762	0.261196	-0.00643348		6.423	0.137519	0.127722	0.0097974
6.434	0.167512	0.166679	0.00083301		6.429	0.0869641	0.0802092	0.00675482		6.481	0.0737962	0.0668942	0.00690201			6.451	0.340942	0.343459	-0.0025171		6.455	0.271662	0.269876	0.00178655		6.427	0.134819	0.133249	0.00156989
6.438	0.173412	0.169186	0.00422635		6.432	0.0768641	0.0819758	-0.00511171		6.483	0.0660962	0.0685295	-0.00243335			6.453	0.351242	0.345769	0.00547326		6.457	0.275162	0.273431	0.00173086		6.428	0.140819	0.13467	0.00614948
6.442	0.171612	0.171732	-0.000119875		6.435	0.0868641	0.0837825	0.00308159		6.489	0.0733962	0.0736856	-0.000289436			6.459	0.355542	0.352798	0.00274476		6.46	0.283562	0.278857	0.00470549		6.432	0.145419	0.140511	0.00490839
6.444	0.173112	0.17302	9.19719e-05		6.438	0.0894641	0.0856303	0.00383378		6.496	0.0853962	0.080206	0.0051902			6.465	0.362442	0.359978	0.00246427		6.463	0.286862	0.284394	0.00246786		6.434	0.157719	0.14353	0.0141896
6.447	0.177412	0.174971	0.00244071		6.442	0.0908641	0.0881596	0.00270444		6.501	0.0891962	0.0852224	0.00397374			6.471	0.373842	0.367314	0.00652832		6.465	0.286062	0.28815	-0.00208745		6.438	0.156519	0.149771	0.006748
6.45	0.180312	0.176946	0.00336636		6.444	0.0903641	0.089453	0.000911002		6.507	0.0937962	0.0916682	0.00212797			6.478	0.374442	0.376074	-0.00163147		6.471	0.301162	0.299729	0.00143357		6.443	0.160619	0.157972	0.00264706
6.452	0.182612	0.178275	0.00433716		6.447	0.0934641	0.09143	0.00203404		6.513	0.101196	0.0986133	0.00258291			6.481	0.380042	0.379896	0.000146669		6.479	0.308462	0.315926	-0.00746359		6.445	0.171019	0.161382	0.00963731
6.456	0.178512	0.180965	-0.00245274		6.451	0.0940641	0.0941363	-7.22222e-05		6.519	0.103796	0.106097	-0.00230081			6.483	0.385142	0.382466	0.00267587		6.48	0.311962	0.318013	-0.00605137		6.447	0.165219	0.164868	0.000351074
6.459	0.176312	0.18301	-0.00669807		6.453	0.100964	0.0955202	0.00544381		6.526	0.113396	0.115566	-0.00216955			6.487	0.385142	0.387664	-0.00252129		6.484	0.323562	0.326509	-0.00294714		6.451	0.171219	0.172077	-0.000857959
6.463	0.181812	0.185775	-0.00396295		6.457	0.0983641	0.0983514	1.26101e-05		6.531	0.123396	0.122854	0.000542245			6.491	0.396042	0.392936	0.00310653		6.486	0.334562	0.330845	0.00371674		6.453	0.168619	0.175804	-0.0071844
6.465	0.188512	0.187174	0.00133823		6.46	0.0991641	0.100532	-0.00136745		6.537	0.130796	0.132223	-0.00142653			6.493	0.405742	0.3956	0.010142		6.491	0.353662	0.34195	0.0117123		6.457	0.183319	0.18351	-0.000190569
6.468	0.186112	0.189293	-0.00318074		6.463	0.0985641	0.102761	-0.00419735		6.542	0.137096	0.140586	-0.00348935			6.498	0.397242	0.402346	-0.00510372		6.493	0.352562	0.346499	0.00606267		6.46	0.195219	0.189519	0.00570046
6.471	0.186412	0.191437	-0.00502487		6.465	0.101364	0.104276	-0.00291221		6.544	0.133996	0.14408	-0.0100838			6.499	0.402042	0.40371	-0.00166744		6.498	0.355562	0.358151	-0.00258901		6.462	0.198819	0.193638	0.00518146
6.474	0.188012	0.193606	-0.00559446		6.47	0.101864	0.108165	-0.00630084		6.549	0.159596	0.153209	0.00638696			6.503	0.408642	0.409214	-0.00057156		6.504	0.379062	0.372673	0.0063893		6.465	0.207619	0.199991	0.00762822
6.478	0.194712	0.196539	-0.0018274		6.471	0.106264	0.10896	-0.00269632		6.555	0.171096	0.164947	0.00614876			6.504	0.400742	0.410602	-0.00985999		6.51	0.386462	0.387807	-0.00134524		6.468	0.217219	0.20656	0.0106588
6.479	0.188312	0.19728	-0.00896788		6.474	0.105564	0.111383	-0.00581914		6.559	0.177296	0.173279	0.00401744			6.509	0.423142	0.41762	0.00552252		6.516	0.403062	0.403581	-0.000519298		6.471	0.219719	0.213354	0.00636559
6.483	0.190512	0.200271	-0.00975918		6.479	0.115064	0.115545	-0.000481181		6.562	0.178596	0.179808	-0.00121166			6.516	0.426142	0.427659	-0.00151641		6.522	0.417662	0.420023	-0.00236071		6.476	0.226419	0.225194	0.00122507
6.486	0.204212	0.202546	0.00166618		6.481	0.114364	0.117255	-0.00289054		6.564	0.184196	0.184299	-0.000103215			6.524	0.435342	0.439446	-0.00410359		6.529	0.433162	0.440087	-0.00692468		6.478	0.233019	0.230119	0.00290032
6.489	0.201212	0.204847	-0.00363553		6.484	0.116364	0.119868	-0.00350355		6.567	0.195396	0.191252	0.004144			6.528	0.450342	0.445468	0.00487413		6.532	0.447362	0.448988	-0.00162563		6.479	0.240819	0.232623	0.0081963
6.494	0.205412	0.208745	-0.0033328		6.485	0.115364	0.120752	-0.00538782		6.573	0.210496	0.205971	0.00452544			6.533	0.446742	0.453119	-0.00637696		6.535	0.453362	0.458076	-0.00471351		6.483	0.234319	0.242924	-0.00860501
6.496	0.202912	0.210325	-0.00741339		6.489	0.128364	0.124357	0.00400742		6.574	0.202996	0.208534	-0.00553762			6.534	0.448442	0.454666	-0.00622381		6.537	0.461262	0.46424	-0.00297794		6.488	0.254419	0.256468	-0.00204847
6.498	0.203812	0.211918	-0.00810651		6.494	0.130164	0.129019	0.00114516		6.58	0.226596	0.22461	0.00198666			6.539	0.455742	0.462485	-0.00674247		6.542	0.475062	0.48003	-0.00496838		6.489	0.259219	0.259269	-4.95263e-05
6.501	0.215812	0.214332	0.00148007		6.496	0.126064	0.130934	-0.00486978		6.581	0.230396	0.227409	0.00298711			6.54	0.469242	0.464065	0.00517678		6.544	0.489162	0.486502	0.00266041		6.493	0.278919	0.270793	0.00812636
6.503	0.207812	0.215957	-0.00814485		6.498	0.127464	0.132878	-0.00541398		6.586	0.243496	0.241949	0.00154689			6.546	0.479342	0.473671	0.0056713		6.549	0.504862	0.503078	0.0017836		6.496	0.289219	0.279782	0.00943692
6.508	0.210612	0.220076	-0.00946385		6.501	0.132064	0.13585	-0.00378615		6.588	0.243596	0.248027	-0.00443116			6.552	0.484142	0.483487	0.000655023		6.555	0.523862	0.523746	0.000115712		6.498	0.294419	0.285946	0.00847326
6.509	0.219712	0.220909	-0.00119747		6.504	0.138864	0.138891	-2.6764e-05		6.59	0.256096	0.254261	0.00183525			6.558	0.488342	0.493519	-0.0051769		6.558	0.530462	0.534408	-0.00394632		6.501	0.299019	0.295455	0.00356373
6.513	0.227612	0.224277	0.00333483		6.508	0.138164	0.143054	-0.00489018		6.596	0.272096	0.273936	-0.0018397			6.565	0.499042	0.505502	-0.00645998		6.564	0.558062	0.556413	0.00164955		6.502	0.308719	0.298697	0.0100218
6.516	0.220112	0.226838	-0.00672619		6.509	0.153064	0.144115	0.00894904		6.599	0.283796	0.284348	-0.000551579			6.569	0.512442	0.512488	-4.53703e-05		6.57	0.572162	0.579357	-0.00719444		6.508	0.314719	0.318935	-0.00421568
6.52	0.226012	0.230301	-0.0042886		6.514	0.150264	0.149542	0.000722507		6.601	0.284396	0.291512	-0.00711578			6.575	0.514442	0.523158	-0.0087156		6.577	0.595762	0.607368	-0.0116055		6.511	0.333019	0.329579	0.00344034
6.523	0.222412	0.232934	-0.0105217		6.516	0.153264	0.151771	0.00149345		6.606	0.300896	0.310237	-0.00934082			6.58	0.530142	0.532229	-0.00208696		6.581	0.614262	0.624	-0.00973778		6.513	0.342219	0.336878	0.00534145
6.524	0.242312	0.233818	0.00849364		6.519	0.148564	0.155178	-0.00661439		6.612	0.344596	0.334331	0.0102648			6.583	0.531142	0.537752	-0.00660951		6.588	0.644962	0.65425	-0.00928787		6.515	0.351119	0.344343	0.00677583
6.529	0.244812	0.238295	0.00651719		6.524	0.164764	0.161034	0.00372999		6.613	0.334496	0.338528	-0.00403229			6.588	0.538842	0.547091	-0.00824886		6.595	0.687362	0.68602	0.00134227		6.519	0.368719	0.35979	0.00892869
6.531	0.229412	0.24011	-0.0106984		6.526	0.163064	0.163439	-0.000375436								6.591	0.557142	0.552777	0.00436534		6.601	0.723162	0.71452	0.00864195		6.522	0.374019	0.371843	0.00217601
6.534	0.245212	0.242861	0.00235097		6.528	0.170364	0.165882	0.00448219								6.595	0.567142	0.560455	0.0066869		6.602	0.726262	0.719388	0.00687414		6.525	0.387119	0.384312	0.00280705
6.536	0.238912	0.244713	-0.00580107		6.532	0.165164	0.17088	-0.00571575								6.596	0.563742	0.562393	0.00134973		6.604	0.731162	0.729227	0.00193537		6.528	0.396119	0.397212	-0.00109289
6.541	0.247712	0.249408	-0.00169611		6.534	0.175864	0.173437	0.00242749								6.603	0.579242	0.576152	0.00308979		6.607	0.761162	0.744246	0.0169156		6.531	0.407719	0.410558	-0.00283902
6.544	0.251612	0.25227	-0.000658276		6.537	0.173764	0.177346	-0.00358159													6.608	0.741662	0.749324	-0.00766173		6.535	0.425819	0.429074	-0.00325528
6.548	0.254212	0.25614	-0.00192806		6.54	0.179164	0.181345	-0.00218126																		6.538	0.442819	0.443524	-0.000704841
6.549	0.256312	0.257117	-0.000805169		6.544	0.188264	0.186823	0.00144119																		6.539	0.443719	0.448451	-0.00473183
6.553	0.254312	0.261065	-0.00675278		6.548	0.189964	0.192471	-0.00250649																		6.544	0.471819	0.473944	-0.00212467
6.554	0.256112	0.262061	-0.00594955		6.549	0.203764	0.19391	0.00985438																		6.546	0.492619	0.484554	0.00806525
6.558	0.270012	0.266089	0.00392338		6.553	0.194264	0.199778	-0.00551358																		6.547	0.494619	0.48995	0.00466895
6.563	0.268312	0.271214	-0.00290166		6.554	0.200564	0.201273	-0.000708872																		6.553	0.512119	0.523651	-0.011532
6.564	0.267112	0.272251	-0.00513899		6.557	0.205264	0.205828	-0.000564082																		6.554	0.526319	0.529495	-0.00317626
6.568	0.273812	0.276442	-0.00263		6.562	0.213164	0.213657	-0.000492767																		6.557	0.551119	0.547434	0.00368561
6.571	0.277812	0.279629	-0.00181749		6.564	0.222664	0.216873	0.00579073																		6.56	0.568219	0.565996	0.00222277
6.574	0.278712	0.282855	-0.00414342		6.568	0.224164	0.223456	0.000707732																		6.564	0.596019	0.591757	0.00426209
6.577	0.284712	0.28612	-0.00140828		6.572	0.223664	0.230245	-0.00658059																		6.567	0.607319	0.611865	-0.00454609
6.58	0.290712	0.289424	0.00128745		6.577	0.242764	0.239029	0.0037353																		6.572	0.631919	0.646951	-0.0150317
6.583	0.296412	0.292769	0.00364327		6.58	0.238664	0.244464	-0.00579957																		6.573	0.644719	0.654212	-0.00949301
6.585	0.304012	0.295021	0.0089914		6.581	0.242464	0.246303	-0.00383925																		6.575	0.672319	0.668987	0.00333252
6.586	0.298012	0.296153	0.00185869		6.585	0.255564	0.253805	0.00175882																		6.58	0.692819	0.707439	-0.0146195
6.59	0.298512	0.30073	-0.00221783		6.586	0.257364	0.255717	0.00164696																		6.581	0.698119	0.715397	-0.017278
6.594	0.319212	0.30538	0.0138317		6.593	0.261964	0.269521	-0.00755653																		6.584	0.737019	0.739828	-0.00280871
6.596	0.311912	0.307734	0.00417835		6.599	0.282864	0.28196	0.00090426																		6.586	0.762319	0.756589	0.0057305
6.601	0.316112	0.3137	0.00241168		6.604	0.301564	0.292775	0.00878906																		6.59	0.788619	0.791288	-0.00266848
6.604	0.318112	0.317338	0.000773776		6.606	0.300564	0.297219	0.00334468																		6.593	0.816119	0.818379	-0.00225978
6.606	0.318412	0.319788	-0.00137596																							6.598	0.876619	0.865661	0.010958
6.61	0.353112	0.324747	0.0283651																							6.599	0.883119	0.875449	0.00767061
6.613	0.323812	0.328519	-0.00470674																							6.603	0.906219	0.915745	-0.00952581
																										6.606	0.949719	0.94721	0.00250922
																										6.611	1.00482	1.00213	0.00268681

## Sheet: CD
p150 CD													NudE CD
Wavelength	5	10	15	20	25	30	35	40	45	50	55		Wavelength	5	10	15	20	25	30	35	40	45	50	55	60
255	0	0	0	0	0	0	0	0	0	0	0		255	0	0	0	0	0	0	0	0	0	0	0	0
254.5	-0.00459704	-0.0129911	-0.0173187	0.0289468	0.0183887	0.00788177	-0.0145305	-0.00172808	-0.016567	-0.0237433	-0.0562709		254.5	-0.0105837	-0.0391989	0.0119221	0.0157974	0.0303111	-0.00387842	-0.0355153	0.0304695	0.00536053	0.0480416	-0.00426211	-0.0435747
254	0.00792956	-0.0305054	0.0428837	0.0665783	-0.0356167	-0.0259562	0.0235079	-0.0192355	-0.0333493	-0.0513158	-0.0969158		254	-0.00512579	-0.0316247	0.0253258	0.0327674	0.0430242	0.000573158	-0.00236263	-0.0116058	-0.0373111	0.0689489	-0.0324289	-0.108268
253.5	-0.0627266	-0.0178941	0.0602759	0.0712404	-0.0295187	-0.129488	0.0167946	-0.022902	-0.0193433	-0.0747468	-0.13187		253.5	-0.0554726	-0.00901263	0.03208	0.0156326	0.0484526	-0.0395137	-0.01246	-0.00629579	-0.0126063	0.0224432	-0.0540068	-0.155998
253	-0.100724	-0.0480936	0.0191182	0.122906	-0.0776773	-0.185103	0.0212517	-0.070303	0.0254182	-0.084167	-0.132539		253	-0.0584111	-0.0108332	0.05705	-0.0119005	0.0297537	-0.0826232	-0.0156853	0.0157358	-0.0380721	-0.0193079	-0.100794	-0.123181
252.5	-0.111839	-0.0782842	-0.0095665	0.109113	-0.0877394	-0.219529	0.00830788	-0.0537749	-0.0123734	-0.0569847	-0.140967		252.5	-0.09014	-0.00332579	0.0342332	-0.0333074	0.0121695	-0.0763216	-0.0779963	0.0341863	-0.0124789	-0.0865963	-0.0660126	-0.173431
252	-0.11586	-0.0694079	-0.0199685	0.0564591	-0.145087	-0.167546	-0.01627	-0.0923985	-0.0283044	-0.0617867	-0.17238		252	-0.10161	-0.0521605	-0.00653105	-0.0381695	-0.0536163	-0.0546779	-0.10257	-0.00646632	0.0256753	-0.102968	-0.0600926	-0.144481
251.5	-0.135185	-0.0807246	-0.045732	0.019197	-0.158122	-0.114844	0.00871429	-0.0515399	-0.0874384	-0.111272	-0.178914		251.5	-0.04269	-0.0799621	-0.00858737	-0.0598626	-0.0803816	-0.0213179	-0.120797	0.0265516	-0.01489	-0.131786	-0.0436868	-0.118038
251	-0.151388	-0.100292	-0.0279936	0.0199557	-0.1968	-0.119374	-0.0402655	-0.081233	-0.0775103	-0.113712	-0.176567		251	-0.0843674	-0.0813095	-0.0771026	-0.0503942	-0.110625	-0.0366484	-0.120925	-0.0182358	-0.0245937	-0.149667	-0.106845	-0.122746
250.5	-0.159655	-0.121529	-0.0492232	0.015132	-0.213236	-0.16122	-0.0489611	-0.101124	-0.0842414	-0.1145	-0.172399		250.5	-0.0799621	-0.104691	-0.11856	-0.0182853	-0.0905563	-0.0501947	-0.172428	-0.0307684	-0.0505816	-0.183384	-0.150918	-0.104376
250	-0.121975	-0.142679	-0.0634759	-0.00448079	-0.186451	-0.186105	-0.0912616	-0.106177	-0.0926995	-0.111059	-0.186934		250	-0.0942763	-0.146464	-0.111829	-0.0403868	-0.113798	-0.0783526	-0.174286	-0.0754211	-0.0931447	-0.185507	-0.184044	-0.128074
249.5	-0.100149	-0.150171	-0.0586532	-0.0492384	-0.197577	-0.187655	-0.122687	-0.119932	-0.142671	-0.148486	-0.197183		249.5	-0.127601	-0.187103	-0.118605	-0.0322953	-0.137111	-0.107517	-0.242757	-0.0946205	-0.123939	-0.231439	-0.188062	-0.138014
249	-0.110414	-0.156782	-0.074632	-0.105738	-0.188625	-0.232018	-0.14945	-0.0953187	-0.1288	-0.195946	-0.217097		249	-0.120147	-0.192904	-0.0735221	-0.0511474	-0.201712	-0.143455	-0.226215	-0.0782826	-0.119508	-0.228583	-0.228662	-0.166923
248.5	-0.196466	-0.178591	-0.089034	-0.152056	-0.194642	-0.289291	-0.161434	-0.133304	-0.135737	-0.247038	-0.259632		248.5	-0.168833	-0.176819	-0.136808	-0.139482	-0.256846	-0.195419	-0.291014	-0.0846895	-0.142316	-0.255657	-0.277917	-0.19824
248	-0.275926	-0.216204	-0.153688	-0.219065	-0.275041	-0.332974	-0.244522	-0.231593	-0.14131	-0.290225	-0.286815		248	-0.206273	-0.156885	-0.173747	-0.159956	-0.253863	-0.205607	-0.366724	-0.113951	-0.154633	-0.324457	-0.299709	-0.262041
247.5	-0.334331	-0.266531	-0.234334	-0.26637	-0.320144	-0.366909	-0.326389	-0.214799	-0.173192	-0.350993	-0.350037		247.5	-0.282488	-0.220969	-0.204342	-0.231371	-0.242222	-0.244968	-0.404877	-0.141165	-0.228377	-0.354642	-0.355578	-0.309404
247	-0.321401	-0.299718	-0.304635	-0.259311	-0.395521	-0.375924	-0.368502	-0.217755	-0.27918	-0.395486	-0.411229		247	-0.383873	-0.215319	-0.248242	-0.224323	-0.247614	-0.272891	-0.466666	-0.208917	-0.296177	-0.357873	-0.335352	-0.303672
246.5	-0.338675	-0.332142	-0.387232	-0.2747	-0.442664	-0.407446	-0.410128	-0.243061	-0.343436	-0.394294	-0.458855		246.5	-0.443194	-0.280215	-0.263489	-0.236765	-0.303058	-0.351633	-0.471682	-0.293506	-0.379804	-0.361689	-0.373441	-0.334098
246	-0.331696	-0.377851	-0.452064	-0.273774	-0.519068	-0.489677	-0.418167	-0.31778	-0.376727	-0.444707	-0.489845		246	-0.474336	-0.367965	-0.313519	-0.344671	-0.425447	-0.399169	-0.543719	-0.355775	-0.446388	-0.422742	-0.395288	-0.360946
245.5	-0.446522	-0.436226	-0.493468	-0.314257	-0.623354	-0.549771	-0.4913	-0.449696	-0.412648	-0.493303	-0.513392		245.5	-0.516057	-0.451834	-0.353556	-0.446371	-0.5209	-0.463527	-0.590798	-0.444785	-0.484677	-0.517705	-0.437446	-0.414319
245	-0.549837	-0.531442	-0.554389	-0.410326	-0.714226	-0.661623	-0.566759	-0.536563	-0.480283	-0.586397	-0.565884		245	-0.585584	-0.594502	-0.451456	-0.525802	-0.646095	-0.498427	-0.622129	-0.519296	-0.554672	-0.584021	-0.528362	-0.495414
244.5	-0.684	-0.610368	-0.598389	-0.544803	-0.804033	-0.730618	-0.67465	-0.615164	-0.574451	-0.671456	-0.575717		244.5	-0.730326	-0.661365	-0.582161	-0.658028	-0.666763	-0.66588	-0.71574	-0.590669	-0.635193	-0.695047	-0.563994	-0.545072
244	-0.768463	-0.705378	-0.728596	-0.706946	-0.923684	-0.857495	-0.745946	-0.698977	-0.691771	-0.713776	-0.629569		244	-0.89251	-0.744871	-0.725293	-0.773586	-0.737937	-0.80718	-0.825408	-0.736406	-0.707604	-0.790157	-0.648462	-0.611514
243.5	-0.823266	-0.835615	-0.874926	-0.807858	-1.11863	-0.991397	-0.813941	-0.815169	-0.75986	-0.707781	-0.738702		243.5	-1.0212	-0.857397	-0.845572	-0.919402	-0.809263	-0.923706	-1.00476	-0.837401	-0.833641	-0.900205	-0.726546	-0.656683
243	-0.949143	-0.948009	-1.0493	-0.96167	-1.31234	-1.11183	-0.868847	-0.916494	-0.798613	-0.782057	-0.834712		243	-1.14668	-0.99726	-1.00662	-0.995492	-0.944821	-1.04778	-1.14179	-0.969812	-0.934272	-0.969647	-0.868831	-0.735351
242.5	-1.09399	-1.11251	-1.20974	-1.09874	-1.49631	-1.33649	-1.03333	-1.00979	-0.902239	-0.855747	-0.977441		242.5	-1.25143	-1.14933	-1.13673	-1.15318	-1.15761	-1.18068	-1.31082	-1.12133	-1.07563	-1.03445	-0.996704	-0.856346
242	-1.31804	-1.33526	-1.41613	-1.30214	-1.60946	-1.50872	-1.24642	-1.14098	-0.992012	-1.01144	-1.00098		242	-1.39044	-1.30283	-1.32039	-1.33112	-1.33047	-1.35715	-1.42923	-1.26845	-1.22471	-1.17552	-1.07893	-0.973267
241.5	-1.55265	-1.55797	-1.61842	-1.55217	-1.7657	-1.7384	-1.49449	-1.26128	-1.10597	-1.16381	-1.10576		241.5	-1.58545	-1.46038	-1.52103	-1.54876	-1.51407	-1.56396	-1.60268	-1.47053	-1.34952	-1.33016	-1.14703	-1.05754
241	-1.79695	-1.80734	-1.8803	-1.77386	-1.95718	-1.96692	-1.69903	-1.5009	-1.24751	-1.28451	-1.21018		241	-1.84134	-1.68498	-1.80468	-1.78894	-1.75697	-1.73444	-1.81456	-1.71412	-1.57366	-1.48609	-1.21629	-1.1372
240.5	-2.06033	-2.01252	-2.12719	-2.01184	-2.25531	-2.24382	-1.9097	-1.72847	-1.40336	-1.42592	-1.35206		240.5	-2.14045	-2.02617	-2.03151	-2.03784	-2.04478	-1.99087	-2.03996	-1.95675	-1.86045	-1.64758	-1.34011	-1.22776
240	-2.33266	-2.25631	-2.39674	-2.32606	-2.52353	-2.53137	-2.13969	-1.96014	-1.64572	-1.53494	-1.54212		240	-2.43728	-2.33262	-2.3371	-2.33509	-2.39468	-2.26223	-2.28275	-2.21193	-2.13112	-1.8013	-1.50939	-1.35195
239.5	-2.61733	-2.53726	-2.7073	-2.65143	-2.91403	-2.87345	-2.41851	-2.20592	-1.88847	-1.67245	-1.65481		239.5	-2.77767	-2.66957	-2.58607	-2.62966	-2.76133	-2.54352	-2.61906	-2.49424	-2.42461	-1.97999	-1.69485	-1.47958
239	-3.00831	-2.92193	-3.13606	-3.0966	-3.29852	-3.22984	-2.71718	-2.50631	-2.1523	-1.83674	-1.82763		239	-3.13633	-3.00167	-2.92477	-2.95233	-3.08348	-2.88726	-3.02831	-2.81053	-2.69332	-2.21782	-1.81753	-1.56048
238.5	-3.3842	-3.36895	-3.57299	-3.47814	-3.79354	-3.66553	-3.08176	-2.80257	-2.41756	-2.00698	-1.95554		238.5	-3.58857	-3.40972	-3.32314	-3.29177	-3.43125	-3.31904	-3.49899	-3.18475	-3.0368	-2.51773	-1.93666	-1.66321
238	-3.8548	-3.86482	-4.0716	-3.95418	-4.31919	-4.16219	-3.42835	-3.10283	-2.73457	-2.23268	-2.10693		238	-4.01186	-3.83403	-3.73962	-3.79228	-3.82498	-3.74759	-3.97422	-3.5488	-3.41393	-2.81615	-2.01625	-1.8453
237.5	-4.35283	-4.39853	-4.58161	-4.50495	-4.88515	-4.6563	-3.89557	-3.41341	-2.97483	-2.45638	-2.25139		237.5	-4.50442	-4.27125	-4.27618	-4.3273	-4.33403	-4.29001	-4.47713	-3.9832	-3.82887	-3.08395	-2.19815	-2.00451
237	-4.86439	-5.01083	-5.07239	-5.1623	-5.45249	-5.18517	-4.37047	-3.81147	-3.30023	-2.65507	-2.39683		237	-5.09203	-4.79079	-4.84426	-4.86024	-4.91714	-4.86366	-4.98874	-4.41833	-4.24041	-3.38746	-2.43446	-2.25236
236.5	-5.4671	-5.64152	-5.69461	-5.84727	-6.09717	-5.84128	-4.91935	-4.26051	-3.63298	-2.88733	-2.65163		236.5	-5.75569	-5.43337	-5.4152	-5.49078	-5.5303	-5.4328	-5.55123	-4.93667	-4.69021	-3.72073	-2.66409	-2.44565
236	-6.16936	-6.38161	-6.32929	-6.57643	-6.85589	-6.49207	-5.35226	-4.76868	-3.96168	-3.22426	-2.95306		236	-6.52316	-6.12637	-6.09688	-6.08446	-6.16414	-6.12148	-6.21076	-5.53722	-5.18438	-4.09419	-2.9459	-2.65209
235.5	-6.92523	-7.10398	-7.04909	-7.30313	-7.64658	-7.22227	-5.89019	-5.28834	-4.34152	-3.52752	-3.25517		235.5	-7.35664	-6.8751	-6.80615	-6.76741	-6.81683	-6.79801	-6.87502	-6.15959	-5.74943	-4.53896	-3.23655	-2.90044
235	-7.7634	-7.91078	-7.80677	-8.08535	-8.47791	-7.95458	-6.46186	-5.81247	-4.78028	-3.92454	-3.53031		235	-8.19627	-7.682	-7.64804	-7.50025	-7.54135	-7.54943	-7.63671	-6.76495	-6.32122	-4.96847	-3.53049	-3.16508
234.5	-8.53163	-8.78033	-8.60155	-8.90988	-9.29796	-8.74808	-7.08364	-6.37533	-5.22806	-4.24898	-3.81491		234.5	-9.11111	-8.47505	-8.55667	-8.36699	-8.37193	-8.34169	-8.46029	-7.41316	-6.96154	-5.41171	-3.85014	-3.38685
234	-9.45089	-9.62895	-9.50993	-9.77343	-10.1886	-9.66227	-7.83226	-6.9207	-5.68924	-4.57596	-4.07115		234	-10.0561	-9.39184	-9.45799	-9.3012	-9.25551	-9.2528	-9.34155	-8.08327	-7.59469	-5.85839	-4.13948	-3.60375
233.5	-10.4005	-10.5606	-10.4907	-10.6883	-11.1369	-10.5681	-8.54004	-7.53351	-6.12717	-4.87718	-4.3598		233.5	-11.0923	-10.3921	-10.4156	-10.3235	-10.2577	-10.2096	-10.2696	-8.93774	-8.33332	-6.35118	-4.42791	-3.85736
233	-11.4641	-11.5302	-11.5583	-11.6837	-12.1607	-11.5214	-9.35068	-8.16321	-6.58141	-5.16028	-4.61303		233	-12.1984	-11.4553	-11.4004	-11.3398	-11.2746	-11.2392	-11.1231	-9.84437	-9.05485	-6.87513	-4.8319	-4.11184
232.5	-12.5225	-12.5574	-12.6286	-12.7294	-13.2417	-12.5114	-10.1087	-8.79371	-7.0991	-5.45462	-4.9492		232.5	-13.4102	-12.5568	-12.4279	-12.3669	-12.2749	-12.2763	-12.0501	-10.6852	-9.82822	-7.44845	-5.1766	-4.36561
232	-13.5502	-13.5916	-13.7211	-13.8177	-14.3264	-13.5463	-10.949	-9.47001	-7.61875	-5.85644	-5.2724		232	-14.6981	-13.704	-13.5285	-13.4729	-13.3599	-13.3273	-12.9767	-11.5744	-10.604	-7.99166	-5.4836	-4.58361
231.5	-14.6249	-14.6929	-14.769	-14.9098	-15.4484	-14.566	-11.7288	-10.0675	-8.10511	-6.27733	-5.61536		231.5	-16.0288	-14.902	-14.6362	-14.5951	-14.493	-14.398	-14.0602	-12.4631	-11.3555	-8.44455	-5.70555	-4.81644
231	-15.7485	-15.8737	-15.8601	-15.9628	-16.5469	-15.5666	-12.4874	-10.7667	-8.59836	-6.63895	-5.9424		231	-17.2957	-16.1038	-15.7459	-15.7845	-15.5978	-15.4915	-15.1479	-13.388	-12.1653	-9.07055	-5.95244	-5.08519
230.5	-16.885	-17.0601	-16.9365	-17.031	-17.6196	-16.5684	-13.2332	-11.4487	-9.09782	-7.00945	-6.19846		230.5	-18.6103	-17.3178	-16.925	-16.9584	-16.7402	-16.5466	-16.2314	-14.2906	-12.9045	-9.67097	-6.26276	-5.3285
230	-17.9856	-18.134	-18.0185	-18.0747	-18.6903	-17.5303	-13.9285	-12.1102	-9.62343	-7.31526	-6.41851		230	-19.7898	-18.4221	-18.1858	-18.1092	-17.8288	-17.6086	-17.3173	-15.0993	-13.7097	-10.2442	-6.58839	-5.5184
229.5	-19.0269	-19.0946	-19.0939	-19.1347	-19.731	-18.4708	-14.7101	-12.7653	-10.1547	-7.61452	-6.70782		229.5	-21.0528	-19.5647	-19.3886	-19.2424	-18.9725	-18.6271	-18.2965	-15.9465	-14.405	-10.7866	-6.90739	-5.77829
229	-20.0234	-20.1109	-20.12	-20.1254	-20.8411	-19.423	-15.4559	-13.3704	-10.639	-7.97565	-6.9959		229	-22.2497	-20.6827	-20.5563	-20.2299	-20.0381	-19.6555	-19.2506	-16.8322	-15.1936	-11.1946	-7.20686	-5.93614
228.5	-20.9909	-21.1387	-21.0939	-21.065	-21.8259	-20.3399	-16.1858	-13.8847	-11.0536	-8.30861	-7.26526		228.5	-23.4079	-21.826	-21.6381	-21.229	-20.9782	-20.6284	-20.1582	-17.6779	-15.9066	-11.6694	-7.57834	-6.20361
228	-21.9903	-22.1697	-22.047	-22.0463	-22.7602	-21.2795	-16.8277	-14.5046	-11.464	-8.62043	-7.53255		228	-24.53	-22.9187	-22.6038	-22.1374	-21.8575	-21.5591	-21.0341	-18.4116	-16.6181	-12.0897	-7.85923	-6.49098
227.5	-22.9356	-23.0676	-22.9511	-22.9282	-23.6635	-22.1456	-17.4832	-15.0601	-11.8087	-8.89122	-7.73309		227.5	-25.6695	-23.8626	-23.5529	-23.0304	-22.7197	-22.4416	-21.8506	-19.089	-17.2693	-12.5216	-8.1777	-6.78377
227	-23.836	-23.8176	-23.8301	-23.7904	-24.4184	-22.8946	-18.0699	-15.5209	-12.15	-9.16137	-7.98688		227	-26.6252	-24.7899	-24.4331	-23.9054	-23.5532	-23.2287	-22.6092	-19.706	-17.8613	-12.894	-8.45744	-7.07445
226.5	-24.6361	-24.5968	-24.6142	-24.5972	-25.1981	-23.5803	-18.6143	-15.9664	-12.4806	-9.36634	-8.10206		226.5	-27.5336	-25.6128	-25.2861	-24.7507	-24.3928	-23.9997	-23.2837	-20.3528	-18.3603	-13.3677	-8.72576	-7.2224
226	-25.3791	-25.3082	-25.286	-25.236	-25.81	-24.1386	-19.0712	-16.3588	-12.8554	-9.59004	-8.3094		226	-28.3623	-26.3379	-26.1177	-25.5037	-25.0634	-24.6214	-23.9348	-20.8963	-18.8134	-13.7625	-8.8927	-7.39598
225.5	-26.0175	-25.9886	-25.8741	-25.8389	-26.4143	-24.6324	-19.4813	-16.6796	-13.1115	-9.73299	-8.42097		225.5	-29.0363	-26.9927	-26.8584	-26.208	-25.7327	-25.2908	-24.564	-21.3508	-19.149	-14.1974	-8.99249	-7.59219
225	-26.597	-26.5043	-26.3857	-26.2977	-26.9113	-25.067	-19.8919	-16.9814	-13.3413	-9.90132	-8.61969		225	-29.7025	-27.5976	-27.4265	-26.7808	-26.1775	-25.9074	-25.1068	-21.7316	-19.4624	-14.4749	-9.18528	-7.74761
224.5	-27.0615	-26.9609	-26.8076	-26.6658	-27.3829	-25.3995	-20.1933	-17.1918	-13.5346	-10.0587	-8.83752		224.5	-30.2098	-28.1921	-27.874	-27.2305	-26.5838	-26.4035	-25.5129	-22.1143	-19.8656	-14.714	-9.31649	-7.93992
224	-27.3793	-27.3351	-27.1584	-27.0171	-27.6939	-25.7205	-20.3251	-17.3828	-13.6854	-10.2368	-8.96299		224	-30.6584	-28.6994	-28.1727	-27.592	-26.9438	-26.7492	-25.8601	-22.4405	-20.2586	-14.9069	-9.55934	-8.08208
223.5	-27.6723	-27.5986	-27.4617	-27.3077	-27.9274	-26.0543	-20.4381	-17.5823	-13.7834	-10.398	-9.10698		223.5	-30.9012	-29.0218	-28.3539	-27.8789	-27.3071	-27.0106	-26.1321	-22.7569	-20.5634	-15.0023	-9.65513	-8.1574
223	-27.857	-27.6926	-27.698	-27.5466	-28.1529	-26.2818	-20.4883	-17.703	-13.8696	-10.4652	-9.15521		223	-31.1687	-29.2243	-28.5838	-28.1744	-27.5439	-27.1177	-26.2619	-22.9633	-20.7811	-15.1764	-9.72386	-8.18119
222.5	-27.9741	-27.7264	-27.884	-27.687	-28.3295	-26.4138	-20.6927	-17.8214	-13.8811	-10.4485	-9.18915		222.5	-31.3908	-29.2623	-28.6908	-28.4536	-27.6939	-27.1852	-26.4132	-23.0492	-20.8753	-15.1886	-9.72355	-8.27871
222	-28.0191	-27.7233	-27.9137	-27.8066	-28.4373	-26.4433	-20.806	-17.9148	-13.9342	-10.419	-9.22526		222	-31.5452	-29.3767	-28.9018	-28.6179	-27.693	-27.2686	-26.5076	-23.1354	-20.9448	-15.2816	-9.75376	-8.36003
221.5	-27.9792	-27.8361	-27.8349	-27.8081	-28.439	-26.4522	-20.826	-17.8783	-13.9405	-10.4936	-9.15156		221.5	-31.6042	-29.3438	-28.9393	-28.6667	-27.6781	-27.3001	-26.5436	-23.1282	-20.9977	-15.2834	-9.96381	-8.49861
221	-27.8656	-27.8303	-27.6325	-27.7838	-28.2918	-26.3186	-20.8069	-17.7576	-13.9394	-10.4735	-9.11043		221	-31.4585	-29.3423	-28.9456	-28.512	-27.6829	-27.3392	-26.5753	-23.2045	-20.9542	-15.2688	-10.0033	-8.55219
220.5	-27.7245	-27.81	-27.4523	-27.6462	-28.1273	-26.2071	-20.7471	-17.6667	-13.9457	-10.4584	-9.09043		220.5	-31.2973	-29.3002	-28.8357	-28.2812	-27.6434	-27.27	-26.4744	-23.1978	-20.9325	-15.3193	-10.0586	-8.5144
220	-27.5876	-27.6488	-27.3519	-27.4679	-27.9504	-26.1014	-20.6475	-17.6636	-13.8687	-10.4072	-9.13989		220	-31.071	-29.2572	-28.6531	-28.1307	-27.5693	-27.1199	-26.3472	-23.0694	-20.9001	-15.3139	-10.017	-8.4875
219.5	-27.4335	-27.5054	-27.2191	-27.2249	-27.7711	-25.9598	-20.5168	-17.6569	-13.837	-10.373	-9.18817		219.5	-30.871	-29.137	-28.4526	-28.0631	-27.4239	-26.9361	-26.1631	-22.9398	-20.8645	-15.2709	-9.98507	-8.43145
219	-27.1012	-27.2751	-27.1083	-26.9633	-27.6272	-25.7875	-20.3569	-17.5269	-13.7932	-10.375	-9.18752		219	-30.6922	-28.8772	-28.2133	-27.9377	-27.2348	-26.7502	-26.0638	-22.7793	-20.8268	-15.1689	-10.0847	-8.48666
218.5	-26.8448	-27.0361	-26.9189	-26.7339	-27.3931	-25.6218	-20.2419	-17.4203	-13.8355	-10.3783	-9.1595		218.5	-30.4888	-28.6047	-28.0027	-27.8172	-27.0671	-26.5997	-25.8738	-22.7042	-20.6255	-15.1173	-10.0722	-8.5435
218	-26.4955	-26.7939	-26.6884	-26.4433	-27.1595	-25.3634	-20.1152	-17.2602	-13.7503	-10.337	-9.20728		218	-30.2937	-28.3468	-27.7485	-27.5942	-26.8427	-26.3418	-25.7081	-22.5196	-20.4769	-15.063	-10.0855	-8.5714
217.5	-26.2541	-26.455	-26.396	-26.2221	-26.9665	-25.0929	-20.0044	-17.1864	-13.6322	-10.2955	-9.13334		217.5	-30.0119	-28.0242	-27.5427	-27.2911	-26.5974	-26.1282	-25.5568	-22.3907	-20.3096	-15.0022	-10.0721	-8.64498
217	-26.029	-26.1731	-26.0778	-25.9733	-26.705	-24.8703	-19.8591	-16.9955	-13.4802	-10.2685	-9.02349		217	-29.6914	-27.7282	-27.3759	-27.024	-26.3997	-25.8253	-25.3891	-22.2925	-20.1611	-15.0352	-10.0414	-8.54029
216.5	-25.8103	-25.8677	-25.848	-25.7762	-26.5174	-24.6045	-19.677	-16.8211	-13.4207	-10.2094	-8.93531		216.5	-29.4853	-27.3405	-27.2293	-26.7715	-26.188	-25.6568	-25.2258	-22.2028	-20.1197	-14.9812	-10.0565	-8.58692
216	-25.6371	-25.6372	-25.6493	-25.5645	-26.3813	-24.413	-19.5637	-16.7012	-13.3841	-10.1934	-8.95211		216	-29.2767	-27.1886	-27.0313	-26.567	-26.0507	-25.5159	-25.0114	-22.0703	-20.0667	-14.9766	-10.0782	-8.64371
215.5	-25.4344	-25.4043	-25.4955	-25.3543	-26.2438	-24.2963	-19.3857	-16.6791	-13.2916	-10.1827	-8.97629		215.5	-29.0762	-27.0176	-26.7755	-26.3572	-25.9329	-25.3665	-24.821	-21.8323	-20.0879	-14.9896	-10.1754	-8.78103
215	-25.2692	-25.2275	-25.2562	-25.1124	-26.023	-24.1496	-19.1486	-16.704	-13.2497	-10.2549	-9.03728		215	-28.9135	-26.8808	-26.5279	-26.12	-25.7452	-25.1702	-24.6704	-21.6821	-20.0769	-14.968	-10.2298	-8.91961
214.5	-25.0545	-25.0762	-25.0188	-24.9847	-25.7865	-24.1053	-19.1367	-16.6631	-13.2055	-10.3937	-9.13373		214.5	-28.7106	-26.6634	-26.3457	-26.01	-25.6406	-25.0925	-24.5412	-21.5991	-19.9665	-15.0563	-10.3262	-8.89292
214	-24.966	-24.9583	-24.7818	-24.8014	-25.6964	-24.0803	-19.1516	-16.5949	-13.2957	-10.3735	-9.19284		214	-28.5666	-26.5204	-26.1591	-25.9196	-25.5687	-25.0905	-24.4176	-21.6574	-19.8966	-15.2097	-10.4325	-8.88745
213.5	-24.8493	-24.7807	-24.6649	-24.7471	-25.5864	-24.0735	-19.2494	-16.5619	-13.326	-10.415	-9.31373		213.5	-28.4137	-26.4672	-26.0898	-26.0798	-25.5506	-25.1092	-24.4841	-21.7601	-19.9018	-15.2012	-10.5927	-9.0195
213	-24.7497	-24.6488	-24.7201	-24.7611	-25.6004	-24.009	-19.3695	-16.6237	-13.4033	-10.4655	-9.36427		213	-28.3549	-26.6028	-26.1135	-26.1253	-25.5532	-25.2072	-24.632	-21.8781	-19.9717	-15.2974	-10.6833	-9.21908
212.5	-24.7805	-24.6583	-24.8608	-24.8334	-25.6548	-24.0087	-19.4809	-16.834	-13.4974	-10.6035	-9.43979		212.5	-28.4514	-26.7588	-26.3303	-26.2288	-25.5886	-25.3193	-24.8117	-21.9811	-20.113	-15.2872	-10.8896	-9.44387
212	-24.8098	-24.7247	-25.0016	-25.0024	-25.7024	-24.1226	-19.7229	-17.1811	-13.8094	-10.8376	-9.61683		212	-28.599	-26.9777	-26.6081	-26.2943	-25.7149	-25.5284	-24.9776	-22.1671	-20.3282	-15.4017	-11.0621	-9.68792
211.5	-24.9402	-24.9265	-25.1183	-25.071	-25.873	-24.2874	-19.9206	-17.4652	-14.1216	-11.0242	-9.92186		211.5	-28.8691	-27.0045	-26.838	-26.4268	-25.962	-25.8399	-25.0991	-22.5915	-20.6214	-15.7496	-11.2727	-9.90266
211	-25.0385	-25.0593	-25.1959	-25.2531	-26.1768	-24.607	-20.1282	-17.7716	-14.434	-11.3027	-10.1983		211	-29.1416	-27.0725	-27.0945	-26.5724	-26.2174	-26.0712	-25.3794	-22.9012	-20.9683	-16.1126	-11.5368	-10.2004
210.5	-25.2411	-25.299	-25.471	-25.4592	-26.3081	-24.8566	-20.3743	-17.8471	-14.7538	-11.5597	-10.5344		210.5	-29.4633	-27.277	-27.2811	-26.7459	-26.5209	-26.366	-25.701	-23.2279	-21.2957	-16.5089	-11.9309	-10.5539
210	-25.4338	-25.5426	-25.6623	-25.6681	-26.5691	-25.2201	-20.5639	-17.9824	-15.0524	-11.876	-10.8765		210	-29.756	-27.5659	-27.4788	-26.9072	-26.7813	-26.6677	-26.1929	-23.5152	-21.6179	-16.6755	-12.4225	-10.9992
209.5	-25.6994	-25.7289	-25.7986	-25.8209	-26.827	-25.4271	-20.7884	-18.191	-15.2424	-12.1967	-11.1773		209.5	-29.9661	-27.7972	-27.6547	-27.0934	-27.1373	-26.9675	-26.4163	-23.7276	-21.9686	-17.0758	-12.9804	-11.4433
209	-25.7589	-25.7965	-25.8049	-25.8905	-27.0134	-25.6044	-20.9471	-18.5125	-15.5415	-12.5015	-11.4393		209	-29.9935	-28.0076	-27.8137	-27.4551	-27.3284	-27.1379	-26.609	-23.9206	-22.3494	-17.4357	-13.3497	-12.0017
208.5	-25.7931	-25.7081	-25.6379	-25.7852	-26.9493	-25.4597	-21.0492	-18.8373	-15.7729	-12.8569	-11.6754		208.5	-29.8403	-27.9938	-27.8568	-27.4915	-27.4201	-27.1032	-26.572	-24.1587	-22.4692	-17.8399	-13.6374	-12.3587
208	-25.5191	-25.4029	-25.3566	-25.5042	-26.5885	-25.1043	-21.0064	-18.8888	-16.0467	-13.2136	-11.9755		208	-29.6125	-27.7967	-27.6135	-27.5435	-27.0745	-26.9081	-26.3091	-24.0277	-22.3312	-18.1238	-13.7577	-12.6951
207.5	-24.8003	-24.8593	-24.7992	-24.9916	-25.909	-24.6097	-20.6876	-18.7371	-16.0493	-13.3901	-12.1148		207.5	-29.2623	-27.4101	-27.1654	-27.1	-26.6631	-26.5011	-25.9099	-23.7886	-21.8559	-18.251	-14.114	-12.9891
207	-23.9401	-23.9842	-24.0025	-24.2876	-25.0637	-23.8045	-20.1904	-18.4481	-15.9087	-13.4794	-12.3403		207	-28.6256	-26.4947	-26.4471	-26.3582	-25.9057	-25.7332	-25.0947	-23.1731	-21.4096	-18.205	-14.3798	-13.2398
206.5	-22.9131	-22.8482	-23.0077	-23.3189	-24.0041	-22.8642	-19.505	-18.1155	-15.7455	-13.5668	-12.5654		206.5	-27.7317	-25.4359	-25.5833	-25.3418	-25.0235	-24.6354	-24.1914	-22.5084	-20.772	-18.1112	-14.6159	-13.5714
206	-21.7147	-21.3741	-21.7538	-21.9288	-22.7249	-21.8188	-18.7314	-17.5426	-15.4002	-13.5783	-12.8155		206	-26.3151	-24.1549	-24.2051	-24.0597	-23.816	-23.3781	-23.0321	-21.444	-20.0852	-17.9197	-14.6854	-13.8486
205.5	-20.2298	-19.8589	-20.257	-20.3593	-21.1817	-20.5018	-17.8686	-16.8182	-15.1654	-13.5794	-12.7746		205.5	-24.5194	-22.6874	-22.6714	-22.5989	-22.2755	-21.9708	-21.6298	-20.2724	-19.037	-17.3107	-14.6242	-14.0202
205	-18.3934	-18.1929	-18.4779	-18.5306	-19.3911	-18.9115	-16.8436	-15.9053	-14.6447	-13.4747	-12.7521		205	-22.5336	-21.1374	-20.8864	-20.9631	-20.4152	-20.3662	-20.1163	-18.8915	-17.8983	-16.6519	-14.6525	-13.936
204.5	-16.3645	-16.4037	-16.4474	-16.7478	-17.3737	-17.1321	-15.6721	-14.8262	-14.1853	-13.2678	-12.774		204.5	-20.4351	-19.2796	-18.9334	-19.1061	-18.4247	-18.4766	-18.3514	-17.4925	-16.8145	-15.811	-14.5533	-13.8404
204	-14.4127	-14.487	-14.3137	-14.7638	-15.1948	-15.0228	-14.2475	-13.7589	-13.5488	-13.0696	-12.8105		204	-18.4697	-17.249	-16.9295	-17.0436	-16.5589	-16.3609	-16.4364	-16.1266	-15.4464	-14.9417	-14.4358	-13.735
203.5	-12.3637	-12.1624	-12.0322	-12.6341	-12.9991	-12.9738	-12.7659	-12.6559	-12.9093	-12.8592	-12.8092		203.5	-16.208	-15.0628	-14.6386	-14.8567	-14.4694	-14.1998	-14.3955	-14.4715	-13.919	-14.0518	-14.094	-13.833
203	-10.2307	-9.76147	-9.90057	-10.2102	-10.5381	-10.8284	-11.2966	-11.4714	-12.0901	-12.6264	-12.5454		203	-13.662	-12.5975	-12.3567	-12.6078	-12.3246	-12.0071	-12.1857	-12.7842	-12.1644	-12.9741	-13.604	-13.8052
202.5	-7.72488	-7.15038	-7.46835	-7.51875	-7.93451	-8.54453	-9.68122	-10.0971	-11.2074	-12.1578	-12.147		202.5	-10.8783	-10.1665	-9.6972	-10.2607	-9.69604	-9.58116	-9.79471	-10.5418	-10.3631	-11.9355	-13.1822	-13.6825
202	-4.91794	-4.3648	-4.80574	-4.67875	-4.92042	-5.88375	-7.69423	-8.38706	-10.1874	-11.5947	-11.8929		202	-7.82722	-7.49073	-6.94172	-7.49046	-7.0613	-7.16069	-7.3105	-7.97053	-8.51454	-10.8903	-12.4242	-13.1145
201.5	-1.85858	-1.42525	-1.86494	-1.45023	-1.81772	-2.9253	-5.49595	-6.53282	-9.1019	-10.8114	-11.2179		201.5	-4.6767	-4.48172	-4.12147	-4.33817	-4.07403	-4.39303	-4.61916	-5.27485	-6.45569	-9.57476	-11.5491	-12.5801
201	1.29879	1.90305	1.5302	1.79198	1.45167	0.0230877	-3.03252	-4.73444	-7.77254	-9.97206	-10.6377		201	-1.33218	-1.08829	-1.00648	-0.969639	-0.929079	-1.37719	-1.53673	-2.60401	-4.10674	-7.92055	-10.487	-11.8944
200.5	4.72981	5.41518	5.05252	5.30194	5.07048	3.41231	-0.3477	-2.65188	-6.25924	-8.95452	-9.64595		200.5	2.26088	2.53153	2.37471	2.71275	2.44892	2.1012	1.97904	0.276878	-1.36656	-5.98576	-9.53413	-11.2452
200	8.51083	9.15316	8.81268	9.21667	8.82608	6.84714	2.40346	-0.322785	-4.6283	-8.03083	-9.14122		200	6.31642	6.04416	6.15643	6.4387	6.09923	5.6911	5.74966	3.38445	1.35745	-4.19443	-8.38981	-10.4197
199.5	12.5717	13.0582	12.7294	13.0227	12.9864	10.8382	5.37252	2.35746	-2.96817	-7.04201	-8.28171		199.5	10.8626	9.98158	10.139	10.2461	10.0808	9.73099	9.46608	6.8071	4.44912	-2.24668	-7.41255	-9.37982
199	17.0731	17.1897	16.9095	17.4349	17.4162	15.103	8.56907	4.8237	-1.04192	-5.51836	-7.47403		199	15.4936	14.4795	14.4491	14.3505	14.1388	13.7311	13.2586	10.5704	7.98599	0.142651	-6.19149	-8.39566
198.5	21.5286	21.8822	21.512	21.987	22.0539	19.3305	11.8431	7.55511	1.11779	-4.00043	-6.2593		198.5	20.4184	19.4498	18.8214	18.9501	18.6185	18.158	17.6286	14.4013	11.3145	2.64555	-5.03123	-7.2915
198	26.227	26.5699	26.4292	26.7221	26.9849	23.6293	15.5635	10.1832	3.46716	-2.12963	-4.7123		198	25.4556	24.5583	23.6506	23.6668	23.4447	22.9934	21.9431	18.4036	14.732	5.15034	-3.69404	-6.3124
197.5	31.0064	31.411	31.275	31.3969	31.8848	27.7193	18.9612	13.2396	5.82145	-0.719574	-2.92241		197.5	30.8763	29.6338	28.6292	28.6038	28.321	28.0289	26.5546	22.4166	18.1147	7.33982	-2.03996	-4.93394
197	35.7699	35.8753	35.7663	35.7814	36.6474	31.8822	22.2282	15.9831	8.02839	0.69872	-1.54024		197	36.3622	34.343	33.3763	33.5028	33.1118	32.88	31.0826	26.0946	21.5614	9.26971	-0.517004	-3.11861
196.5	40.4392	40.2408	40.1643	39.9669	40.9693	36.1424	25.4675	18.9663	10.1136	2.11061	0.0872236		196.5	41.4613	38.9614	38.3101	38.025	37.709	37.2226	35.7402	30.156	25.3031	11.4041	0.709159	-1.52474
196	44.3858	44.3511	44.1253	44.1116	45.0447	40.1338	28.357	21.6334	12.4381	3.59106	1.07961		196	46.1392	43.1951	43.003	42.5625	41.9731	41.4292	40.0953	33.6995	28.6646	13.7187	2.03993	-0.494425
195.5	47.7504	48.3245	47.6508	48.0331	48.6016	43.9977	31.3473	24.6129	14.6155	5.20844	2.53163		195.5	50.1923	47.3945	47.6161	46.7315	46.1931	45.1932	43.9775	36.985	31.4548	15.7813	3.9194	0.659677
195	50.6548	51.5176	51.1206	51.1855	52.0173	46.9672	34.15	27.1392	16.422	7.03553	4.12231		195	54.3198	51.4092	51.3445	50.3224	49.5944	48.7745	47.2191	40.1374	33.8757	17.6567	5.89251	1.89818

## Sheet: SEC-MALS
IC260 MALS
time (min)	LS	time (min)	UV	time (min)	dRI		time (min)	Molar Mass (Da)
-0.271851	0.000132003	0.00106667	0.000538913	-0.393011	4.88526e-05		17.4518	37034.5
-0.263318	0.000134143	0.00959996	0.000572748	-0.384239	4.07649e-05		17.4603	36671.5
-0.254784	0.000129818	0.0181332	0.00060454	-0.375467	2.89432e-05		17.4689	36323.2
-0.246251	0.000113127	0.0266665	0.000634346	-0.366695	1.01577e-05		17.4774	35934.2
-0.237718	9.83174e-05	0.0351998	0.000662262	-0.357923	-1.20614e-05		17.4859	35560.7
-0.229184	8.46828e-05	0.0437331	0.000688408	-0.349151	-3.87981e-05		17.4945	35202.5
-0.220651	7.15844e-05	0.0522664	0.000712929	-0.340379	-6.63218e-05		17.503	34819.6
-0.212118	5.50469e-05	0.0607997	0.000735971	-0.331607	-9.46688e-05		17.5115	34452.5
-0.203585	4.66011e-05	0.069333	0.000757672	-0.322835	-0.000125884		17.5201	34106.4
-0.195051	4.02866e-05	0.0778663	0.000778136	-0.314063	-0.000156116		17.5286	33817.4
-0.186518	3.46254e-05	0.0863996	0.000797429	-0.305291	-0.000187828		17.5371	33597.6
-0.177985	2.91436e-05	0.0949328	0.000815567	-0.296519	-0.00021517		17.5457	33368.2
-0.169451	3.39069e-05	0.103466	0.000832531	-0.287747	-0.000236281		17.5542	33118.7
-0.160918	4.0796e-05	0.111999	0.00084828	-0.278975	-0.000257928		17.5627	32879.5
-0.152385	4.75439e-05	0.120533	0.000862771	-0.270203	-0.000276404		17.5713	32633.3
-0.143852	5.08715e-05	0.129066	0.00087598	-0.261431	-0.00028669		17.5798	32370.7
-0.135318	5.05789e-05	0.137599	0.000887912	-0.252659	-0.000288829		17.5883	32101
-0.126785	4.38396e-05	0.146133	0.000898599	-0.243887	-0.000290199		17.5969	31835.6
-0.118252	2.22509e-05	0.154666	0.000908098	-0.235115	-0.000291817		17.6054	31622.7
-0.109718	4.30425e-07	0.163199	0.000916469	-0.226343	-0.000290368		17.6139	31458.2
-0.101185	-1.90566e-05	0.171732	0.000923763	-0.217571	-0.000286602		17.6225	31348.9
-0.0926519	-2.82093e-05	0.180266	0.000930007	-0.208799	-0.000278805		17.631	31217.6
-0.0841186	-3.72697e-05	0.188799	0.000935198	-0.200027	-0.000273376		17.6395	31069.3
-0.0755853	-4.80977e-05	0.197332	0.000939309	-0.191255	-0.000272465		17.6481	30935.1
-0.067052	-6.39067e-05	0.205866	0.000942294	-0.182483	-0.000271714		17.6566	30786.3
-0.0585187	-8.17581e-05	0.214399	0.000944096	-0.173711	-0.00026987		17.6651	30629.5
-0.0499854	-8.89516e-05	0.222932	0.000944665	-0.164939	-0.000266179		17.6737	30460.4
-0.0414521	-9.15426e-05	0.231465	0.000943956	-0.156167	-0.000262858		17.6822	30279.1
-0.0329188	-8.8936e-05	0.239999	0.000941948	-0.147395	-0.000261903		17.6907	30103.8
-0.0243855	-8.28906e-05	0.248532	0.000938642	-0.138623	-0.000258524		17.6993	29946.2
-0.0158523	-7.95051e-05	0.257065	0.000934067	-0.129851	-0.000254406		17.7078	29842.8
-0.00731897	-7.9451e-05	0.265599	0.000928288	-0.121079	-0.000250753		17.7163	29763.2
0.00121432	-8.15101e-05	0.274132	0.000921396	-0.112307	-0.00024495		17.7249	29686.5
0.00974761	-7.1892e-05	0.282665	0.000913515	-0.103535	-0.000243644		17.7334	29598.1
0.0182809	-5.85879e-05	0.291198	0.000904782	-0.0947626	-0.000241887		17.7419	29505.1
0.0268142	-4.61833e-05	0.299732	0.000895349	-0.0859906	-0.000237452		17.7505	29425.3
0.0353475	-3.80837e-05	0.308265	0.000885362	-0.0772186	-0.000233097		17.759	29340.2
0.0438808	-3.43666e-05	0.316798	0.000874963	-0.0684466	-0.000225294		17.7675	29246.8
0.0524141	-3.328e-05	0.325332	0.00086428	-0.0596746	-0.000220759		17.7761	29149.3
0.0609473	-2.89588e-05	0.333865	0.000853432	-0.0509026	-0.000220975		17.7846	29070
0.0694806	-2.08071e-05	0.342398	0.000842528	-0.0421306	-0.000217389		17.7931	29020.6
0.0780139	-6.61402e-06	0.350932	0.000831669	-0.0333586	-0.000214705		17.8017	28986.4
0.0865472	1.17425e-05	0.359465	0.000820946	-0.0245866	-0.000213839		17.8102	28952.5
0.0950805	2.31795e-05	0.367998	0.000810435	-0.0158146	-0.000212974		17.8187	28908
0.103614	2.66236e-05	0.376531	0.000800194	-0.00704261	-0.000212731		17.8273	28860
0.112147	3.83463e-05	0.385065	0.000790255	0.00172939	-0.000213489		17.8358	28814.5
0.12068	5.29289e-05	0.393598	0.000780627	0.0105014	-0.000214247		17.8443	28769.8
0.129214	6.67092e-05	0.402131	0.000771297	0.0192734	-0.000215521		17.8529	28719.4
0.137747	7.9407e-05	0.410665	0.000762234	0.0280454	-0.000217213		17.8614	28668.6
0.14628	9.5718e-05	0.419198	0.000753399	0.0368174	-0.000220707		17.8699	28627.3
0.154814	0.00011606	0.427731	0.000744752	0.0455894	-0.000223642		17.8785	28607.8
0.163347	0.000134388	0.436264	0.000736256	0.0543614	-0.000227189		17.887	28598.9
0.17188	0.000149933	0.444798	0.000727882	0.0631334	-0.000229995		17.8955	28584.6
0.180413	0.000159216	0.453331	0.000719612	0.0719054	-0.000235964		17.9041	28567.2
0.188947	0.00015233	0.461864	0.00071144	0.0806774	-0.000243484		17.9126	28544.3
0.19748	0.00014642	0.470398	0.00070337	0.0894494	-0.000249315		17.9211	28521.3
0.206013	0.000137366	0.478931	0.000695408	0.0982214	-0.000252121		17.9297	28500.2
0.214547	0.000124276	0.487464	0.00068756	0.106993	-0.000253759		17.9382	28498.2
0.22308	0.000108015	0.495997	0.000679817	0.115765	-0.000257087		17.9467	28491.9
0.231613	0.000114842	0.504531	0.000672156	0.124537	-0.000260766		17.9553	28471.7
0.240146	0.000122533	0.513064	0.000664533	0.133309	-0.000263903		17.9638	28457.2
0.24868	0.000126751	0.521597	0.000656883	0.142081	-0.00026528		17.9723	28446.8
0.257213	0.000124577	0.530131	0.000649128	0.150853	-0.000267352		17.9809	28438.4
0.265746	0.000123757	0.538664	0.000641183	0.159625	-0.000272554		17.9894	28439
0.27428	0.000122081	0.547197	0.000632966	0.168397	-0.000275717		17.9979	28433.9
0.282813	0.000119046	0.55573	0.000624411	0.177169	-0.000278093		18.0065	28424.3
0.291346	0.000112252	0.564264	0.000615477	0.185941	-0.00027838		18.015	28418.2
0.299879	0.000101637	0.572797	0.000606147	0.194713	-0.000272138		18.0235	28421.6
0.308413	8.7217e-05	0.58133	0.000596428	0.203485	-0.000270988		18.0321	28434.2
0.316946	6.93277e-05	0.589864	0.000586342	0.212257	-0.000269838		18.0406	28452.4
0.325479	4.29982e-05	0.598397	0.000575916	0.221029	-0.00026685		18.0491	28479.3
0.334013	2.82826e-05	0.60693	0.000565167	0.229801	-0.000259582		18.0577	28494.5
0.342546	3.16266e-05	0.615463	0.000554101	0.238573	-0.000252474		18.0662	28493.2
0.351079	4.29011e-05	0.623997	0.000542705	0.247345	-0.000251399		18.0747	28498.4
0.359612	5.2776e-05	0.63253	0.000530954	0.256117	-0.000251771		18.0833	28508.2
0.368146	6.01901e-05	0.641063	0.000518819	0.264889	-0.000246372		18.0918	28522.9
0.376679	7.41535e-05	0.649597	0.000506276	0.273661	-0.000239745		18.1003	28536.1
0.385212	8.82913e-05	0.65813	0.000493323	0.282433	-0.000234377		18.1089	28562.9
0.393746	9.94184e-05	0.666663	0.000479986	0.291205	-0.000229854		18.1174	28595
0.402279	0.000107514	0.675196	0.000466335	0.299977	-0.00022619		18.1259	28632.7
0.410812	9.55227e-05	0.68373	0.000452483	0.308749	-0.000223977		18.1345	28664.6
0.419345	8.44248e-05	0.692263	0.000438586	0.317521	-0.000220111		18.143	28699.9
0.427879	7.24292e-05	0.700796	0.00042483	0.326293	-0.000213525		18.1515	28711
0.436412	5.86657e-05	0.70933	0.000411417	0.335065	-0.000209824		18.1601	28713.7
0.444945	4.1564e-05	0.717863	0.000398539	0.343837	-0.000208385		18.1686	28746.1
0.453479	2.11729e-05	0.726396	0.000386356	0.352609	-0.000206305		18.1771	28781
0.462012	1.40361e-05	0.734929	0.000374982	0.361381	-0.000201952		18.1857	28816
0.470545	1.44653e-05	0.743463	0.000364468	0.370153	-0.000194154		18.1942	28842.8
0.479078	1.41143e-05	0.751996	0.000354805	0.378925	-0.000188568		18.2027	28882.4
0.487612	1.19647e-05	0.760529	0.000345936	0.387697	-0.000185053		18.2113	28933
0.496145	4.34535e-06	0.769063	0.000337769	0.396469	-0.00018098		18.2198	28979.3
0.504678	-1.7757e-05	0.777596	0.000330201	0.405241	-0.000173578		18.2283	29004.9
0.513212	-3.29407e-05	0.786129	0.00032313	0.414013	-0.00016644		18.2369	29037.5
0.521745	-3.79101e-05	0.794663	0.000316462	0.422785	-0.00016366		18.2454	29069.6
0.530278	-3.3694e-05	0.803196	0.000310121	0.431557	-0.000163205		18.2539	29088.2
0.538812	-1.79027e-05	0.811729	0.00030404	0.440329	-0.000159572		18.2625	29111.8
0.547345	-2.94655e-06	0.820262	0.000298155	0.449101	-0.000152831		18.271	29142.1
0.555878	9.20363e-06	0.828796	0.000292402	0.457873	-0.000148165		18.2795	29178.1
0.564411	1.66514e-05	0.837329	0.00028671	0.466645	-0.000146648		18.2881	29239.6
0.572945	7.752e-06	0.845862	0.000281004	0.475417	-0.000144092		18.2966	29324.1
0.581478	-8.73843e-06	0.854396	0.000275207	0.484189	-0.000139065		18.3051	29400.4
0.590011	-2.14052e-05	0.862929	0.000269259	0.492961	-0.00013544		18.3137	29458.3
0.598545	-3.09036e-05	0.871462	0.000263121	0.501733	-0.000132299		18.3222	29480.1
0.607078	-3.78817e-05	0.879995	0.000256791	0.510505	-0.000128649		18.3307	29478.8
0.615611	-4.61786e-05	0.888529	0.000250307	0.519277	-0.000128056		18.3393	29491.3
0.624144	-5.6279e-05	0.897062	0.000243741	0.528049	-0.000128014		18.3478	29521.4
0.632678	-7.19231e-05	0.905595	0.00023715	0.536821	-0.000122652		18.3563	29536.8
0.641211	-9.0398e-05	0.914129	0.000230668	0.545593	-0.000115511		18.3649	29553.6
0.649744	-0.000110918	0.922662	0.000224359	0.554365	-0.000110352		18.3734	29608.6
0.658278	-0.000139383	0.931195	0.000218243	0.563137	-0.000106516		18.3819	29671.8
0.666811	-0.000158783	0.939728	0.000212289	0.571909	-0.000103821		18.3905	29736.2
0.675344	-0.000163424	0.948262	0.000206417	0.580681	-9.87118e-05		18.399	29786.2
0.683877	-0.000164182	0.956795	0.000200507	0.589453	-8.98857e-05		18.4075	29830.4
0.692411	-0.00016242	0.965328	0.000194438	0.598225	-8.52672e-05		18.4161	29865.4
0.700944	-0.000157199	0.973862	0.000188095	0.606997	-8.17267e-05		18.4246	29885.5
0.709477	-0.000133326	0.982395	0.000181385	0.615769	-7.67959e-05		18.4331	29919.9
0.718011	-0.000105873	0.990928	0.00017424	0.624541	-7.26389e-05		18.4417	29982.3
0.726544	-7.79765e-05	0.999461	0.000166614	0.633313	-6.75499e-05		18.4502	30047.3
0.735077	-5.7622e-05	1.00799	0.000158472	0.642085	-6.18894e-05		18.4587	30088.6
0.74361	-4.54015e-05	1.01653	0.000149784	0.650857	-5.71232e-05		18.4673	30172.4
0.752144	-4.55802e-05	1.02506	0.000140532	0.659629	-5.43725e-05		18.4758	30251.9
0.760677	-4.1492e-05	1.03359	0.000130718	0.668401	-4.93607e-05		18.4843	30313.7
0.76921	-3.40407e-05	1.04213	0.00012038	0.677173	-4.19405e-05		18.4929	30362.1
0.777744	-3.77413e-05	1.05066	0.000109609	0.685945	-4.13674e-05		18.5014	30374.2
0.786277	-5.37958e-05	1.05919	9.8555e-05	0.694717	-4.07942e-05		18.5099	30400.6
0.79481	-6.15652e-05	1.06773	8.74181e-05	0.703489	-4.06301e-05		18.5185	30415.3
0.803343	-5.77372e-05	1.07626	7.64372e-05	0.712261	-3.56835e-05		18.527	30444
0.811877	-5.10856e-05	1.08479	6.58601e-05	0.721033	-2.83461e-05		18.5355	30479.9
0.82041	-4.63341e-05	1.09333	5.59134e-05	0.729805	-2.47239e-05		18.5441	30509.9
0.828943	-4.38047e-05	1.10186	4.67753e-05	0.738577	-2.34238e-05		18.5526	30540.7
0.837477	-4.20799e-05	1.11039	3.85601e-05	0.747349	-2.23652e-05		18.5611	30584.9
0.84601	-4.0867e-05	1.11893	3.13072e-05	0.756121	-1.89247e-05		18.5697	30624.4
0.854543	-4.15299e-05	1.12746	2.49841e-05	0.764893	-1.48436e-05		18.5782	30631
0.863076	-2.36791e-05	1.13599	1.94924e-05	0.773665	-1.51437e-05		18.5867	30607.7
0.87161	-5.92653e-07	1.14453	1.46757e-05	0.782437	-1.58178e-05
0.880143	1.66481e-05	1.15306	1.0336e-05	0.791209	-1.6492e-05
0.888676	2.72747e-05	1.16159	6.24649e-06	0.799981	-1.44803e-05
0.89721	3.0879e-05	1.17013	2.16498e-06	0.808753	-1.2683e-05
0.905743	3.32259e-05	1.17866	-2.15181e-06	0.817525	-1.21648e-05
0.914276	3.31868e-05	1.18719	-6.93226e-06	0.826297	-1.16467e-05
0.922809	3.06214e-05	1.19573	-1.23767e-05	0.835069	-1.096e-05
0.931343	2.17786e-05	1.20426	-1.86462e-05	0.843841	-7.75158e-06
0.939876	1.07349e-05	1.21279	-2.58564e-05	0.852613	-4.56455e-06
0.948409	-1.5568e-06	1.22133	-3.40729e-05	0.861385	-5.15699e-06
0.956943	-1.71656e-05	1.22986	-4.33094e-05	0.870157	-5.41278e-06
0.965476	-3.18068e-05	1.23839	-5.35298e-05	0.878929	-5.66858e-06
0.974009	-4.01289e-05	1.24693	-6.46474e-05	0.887701	-4.9385e-06
0.982543	-4.47662e-05	1.25546	-7.65264e-05	0.896473	2.10192e-08
0.991076	-4.65923e-05	1.26399	-8.89865e-05	0.905245	3.12886e-06
0.999609	-3.81624e-05	1.27253	-0.000101814	0.914017	5.25716e-06
1.00814	-2.57455e-05	1.28106	-0.000114778	0.922789	7.66055e-06
1.01668	-1.59553e-05	1.28959	-0.000127658	0.931561	1.17211e-05
1.02521	-9.4011e-06	1.29813	-0.000140258	0.940333	1.62429e-05
1.03374	-1.86607e-05	1.30666	-0.000152438	0.949105	1.644e-05
1.04228	-3.08701e-05	1.31519	-0.000164125	0.957877	1.58766e-05
1.05081	-4.33799e-05	1.32373	-0.000175316	0.966649	1.53131e-05
1.05934	-6.19006e-05	1.33226	-0.000186071	0.975421	1.68502e-05
1.06788	-7.49614e-05	1.34079	-0.000196486	0.984193	2.13241e-05
1.07641	-7.73313e-05	1.34933	-0.000206673	0.992965	2.34596e-05
1.08494	-7.50477e-05	1.35786	-0.000216736	1.00174	2.34838e-05
1.09348	-7.91348e-05	1.36639	-0.000226747	1.01051	2.3003e-05
1.10201	-9.06004e-05	1.37493	-0.000236738	1.01928	2.77751e-05
1.11054	-9.77997e-05	1.38346	-0.000246695	1.02805	2.77373e-05
1.11908	-0.000100034	1.39199	-0.000256574	1.03683	2.72759e-05
1.12761	-0.00010226	1.40053	-0.000266307	1.0456	2.68145e-05
1.13614	-0.000105225	1.40906	-0.000275816	1.05437	2.78001e-05
1.14467	-0.000112578	1.41759	-0.000285032	1.06314	2.92941e-05
1.15321	-0.000107282	1.42613	-0.000293888	1.07191	3.07359e-05
1.16174	-9.74443e-05	1.43466	-0.000302341	1.08069	3.04423e-05
1.17027	-8.75991e-05	1.44319	-0.000310372	1.08946	3.12293e-05
1.17881	-8.74398e-05	1.45173	-0.000317989	1.09823	3.08535e-05
1.18734	-9.7562e-05	1.46026	-0.000325225	1.107	3.04778e-05
1.19587	-0.000108194	1.46879	-0.00033214	1.11577	3.32538e-05
1.20441	-0.000116204	1.47733	-0.000338797	1.12455	3.22265e-05
1.21294	-0.000122997	1.48586	-0.000345269	1.13332	3.11992e-05
1.22147	-0.000128943	1.49439	-0.000351617	1.14209	2.95964e-05
1.23001	-0.000129804	1.50293	-0.000357892	1.15086	3.00466e-05
1.23854	-0.000131557	1.51146	-0.000364127	1.15963	2.95181e-05
1.24707	-0.000135183	1.51999	-0.00037034	1.16841	2.88476e-05
1.25561	-0.000133836	1.52853	-0.000376538	1.17718	2.81771e-05
1.26414	-0.000120745	1.53706	-0.000382721	1.18595	2.95696e-05
1.27267	-0.000107969	1.54559	-0.000388897	1.19472	2.87996e-05
1.28121	-9.75547e-05	1.55413	-0.000395079	1.20349	2.80297e-05
1.28974	-9.19698e-05	1.56266	-0.000401291	1.21227	2.67446e-05
1.29827	-9.75012e-05	1.57119	-0.000407567	1.22104	2.24358e-05
1.30681	-9.14439e-05	1.57973	-0.000413938	1.22981	1.97579e-05
1.31534	-7.98618e-05	1.58826	-0.000420432	1.23858	1.89726e-05
1.32387	-7.2215e-05	1.59679	-0.000427064	1.24735	2.09378e-05
1.33241	-6.93743e-05	1.60532	-0.000433834	1.25613	2.04188e-05
1.34094	-8.23482e-05	1.61386	-0.000440723	1.2649	1.98999e-05
1.34947	-9.32032e-05	1.62239	-0.000447701	1.27367	1.98853e-05
1.35801	-0.000101307	1.63092	-0.000454729	1.28244	2.17719e-05
1.36654	-0.00010735	1.63946	-0.000461769	1.29121	2.07935e-05
1.37507	-0.000104739	1.64799	-0.00046879	1.29999	1.98151e-05
1.38361	-9.64217e-05	1.65652	-0.000475774	1.30876	1.74556e-05
1.39214	-8.65462e-05	1.66506	-0.000482719	1.31753	1.3929e-05
1.40067	-7.57926e-05	1.67359	-0.000489634	1.3263	1.49437e-05
1.40921	-6.12047e-05	1.68212	-0.000496536	1.33507	1.4086e-05
1.41774	-3.94174e-05	1.69066	-0.000503447	1.34385	1.32282e-05
1.42627	-1.5072e-05	1.69919	-0.000510384	1.35262	1.14423e-05
1.43481	7.58927e-06	1.70772	-0.000517359	1.36139	8.249e-06
1.44334	2.23733e-05	1.71626	-0.000524384	1.37016	8.13531e-06
1.45187	2.90872e-05	1.72479	-0.000531464	1.37893	7.11474e-06
1.46041	3.95326e-05	1.73332	-0.000538603	1.38771	6.09416e-06
1.46894	5.01991e-05	1.74186	-0.000545801	1.39648	7.28523e-07
1.47747	5.1396e-05	1.75039	-0.000553056	1.40525	-5.27911e-06
1.48601	4.25878e-05	1.75892	-0.000560356	1.41402	-8.50008e-06
1.49454	2.50963e-05	1.76746	-0.000567675	1.42279	-8.61866e-06
1.50307	1.28537e-05	1.77599	-0.00057497	1.43157	-9.30916e-06
1.51161	8.38223e-06	1.78452	-0.000582185	1.44034	-1.14941e-05
1.52014	8.42459e-06	1.79306	-0.000589255	1.44911	-1.3679e-05
1.52867	8.96339e-06	1.80159	-0.000596115	1.45788	-1.58382e-05
1.53721	9.40753e-06	1.81012	-0.000602717	1.46665	-1.66574e-05
1.54574	1.1849e-05	1.81866	-0.000609028	1.47543	-1.74766e-05
1.55427	1.32371e-05	1.82719	-0.000615036	1.4842	-2.15321e-05
1.56281	1.31205e-05	1.83572	-0.000620744	1.49297	-2.38138e-05
1.57134	8.26094e-06	1.84426	-0.000626165	1.50174	-2.3978e-05
1.57987	4.05449e-06	1.85279	-0.000631306	1.51051	-2.2394e-05
1.58841	7.60087e-07	1.86132	-0.000636174	1.51929	-2.24931e-05
1.59694	-3.28945e-06	1.86986	-0.000640766	1.52806	-2.25922e-05
1.60547	-8.26793e-06	1.87839	-0.000645084	1.53683	-2.0366e-05
1.61401	-1.55434e-05	1.88692	-0.000649135	1.5456	-2.02446e-05
1.62254	-2.80871e-05	1.89546	-0.000652951	1.55437	-2.08715e-05
1.63107	-2.98919e-05	1.90399	-0.000656592	1.56315	-2.21589e-05
1.63961	-2.39526e-05	1.91252	-0.000660155	1.57192	-2.34463e-05
1.64814	-1.27273e-05	1.92106	-0.000663773	1.58069	-2.78697e-05
1.65667	3.07316e-06	1.92959	-0.00066761	1.58946	-2.73303e-05
1.66521	1.61213e-05	1.93812	-0.000671859	1.59823	-2.80395e-05
1.67374	2.55135e-05	1.94666	-0.000676726	1.60701	-2.89432e-05
1.68227	2.29133e-05	1.95519	-0.000682425	1.61578	-2.98468e-05
1.69081	2.07646e-05	1.96372	-0.000689152	1.62455	-3.23079e-05
1.69934	2.79398e-05	1.97226	-0.000697065	1.63332	-3.37211e-05
1.70787	3.78279e-05	1.98079	-0.000706274	1.64209	-3.49815e-05
1.71641	4.89581e-05	1.98932	-0.000716802	1.65087	-3.6242e-05
1.72494	6.15736e-05	1.99786	-0.000728583	1.65964	-3.80964e-05
1.73347	7.59663e-05	2.00639	-0.000741451	1.66841	-4.13316e-05
1.74201	9.2005e-05	2.01492	-0.000755152	1.67718	-4.06879e-05
1.75054	0.000106172	2.02346	-0.000769365	1.68595	-3.94236e-05
1.75907	0.000118081	2.03199	-0.00078374	1.69473	-3.92497e-05
1.76761	0.000126369	2.04052	-0.000797936	1.7035	-3.90757e-05
1.77614	0.000138239	2.04906	-0.000811669	1.71227	-3.95159e-05
1.78467	0.000151374	2.05759	-0.000824744	1.72104	-3.88997e-05
1.7932	0.000177023	2.06612	-0.000837073	1.72981	-3.92138e-05
1.80174	0.0002096	2.07466	-0.000848682	1.73859	-4.15863e-05
1.81027	0.000236217	2.08319	-0.000859697	1.74736	-4.39588e-05
1.8188	0.000255568	2.09172	-0.000870308	1.75613	-4.4798e-05
1.82734	0.000251355	2.10026	-0.000880729	1.7649	-4.53135e-05
1.83587	0.000245168	2.10879	-0.000891164	1.77367	-4.60205e-05
1.8444	0.000249075	2.11732	-0.00090177	1.78245	-4.68234e-05
1.85294	0.00025603	2.12586	-0.000912633	1.79122	-4.76262e-05
1.86147	0.000261718	2.13439	-0.000923759	1.79999	-5.03768e-05
1.87	0.0002658	2.14292	-0.000935087	1.80876	-4.88641e-05
1.87854	0.000267851	2.15146	-0.000946509	1.81753	-4.95827e-05
1.88707	0.000267987	2.15999	-0.000957893	1.82631	-5.07597e-05
1.8956	0.000270405	2.16852	-0.000969113	1.83508	-5.19366e-05
1.90414	0.000270511	2.17706	-0.000980068	1.84385	-5.47421e-05
1.91267	0.000267668	2.18559	-0.000990696	1.85262	-5.36664e-05
1.9212	0.000260217	2.19412	-0.00100097	1.86139	-5.17883e-05
1.92974	0.000258933	2.20266	-0.00101092	1.87017	-5.12676e-05
1.93827	0.000262743	2.21119	-0.00102057	1.87894	-5.11513e-05
1.9468	0.000267889	2.21972	-0.00102999	1.88771	-4.90869e-05
1.95534	0.000272692	2.22825	-0.00103924	1.89648	-4.69048e-05
1.96387	0.000277	2.23679	-0.0010484	1.90525	-4.71257e-05
1.9724	0.000268101	2.24532	-0.00105751	1.91403	-4.76937e-05
1.98094	0.000258239	2.25385	-0.00106665	1.9228	-4.84479e-05
1.98947	0.000248062	2.26239	-0.00107584	1.93157	-4.9202e-05
1.998	0.000237299	2.27092	-0.00108512	1.94034	-4.74728e-05
2.00654	0.000224158	2.27945	-0.00109447	1.94911	-4.44548e-05
2.01507	0.000211645	2.28799	-0.00110386	1.95789	-4.08949e-05
2.0236	0.000200234	2.29652	-0.00111326	1.96666	-4.15031e-05
2.03214	0.000188508	2.30505	-0.00112258	1.97543	-4.21114e-05
2.04067	0.000176813	2.31359	-0.00113176	1.9842	-4.12785e-05
2.0492	0.000165232	2.32212	-0.00114076	1.99297	-4.05961e-05
2.05774	0.00013736	2.33065	-0.00114952	2.00175	-4.10597e-05
2.06627	0.000112588	2.33919	-0.00115803	2.01052	-4.18865e-05
2.0748	9.23359e-05	2.34772	-0.00116631	2.01929	-4.27133e-05
2.08334	7.46679e-05	2.35625	-0.00117439	2.02806	-4.37394e-05
2.09187	5.91069e-05	2.36479	-0.00118233	2.03683	-4.43896e-05
2.1004	5.11466e-05	2.37332	-0.0011902	2.04561	-4.19107e-05
2.10894	4.26124e-05	2.38185	-0.00119806	2.05438	-4.23474e-05
2.11747	3.2104e-05	2.39039	-0.00120596	2.06315	-4.27842e-05
2.126	1.70637e-05	2.39892	-0.0012139	2.07192	-4.28216e-05
2.13454	1.85899e-06	2.40745	-0.00122185	2.08069	-4.35509e-05
2.14307	-1.2728e-05	2.41599	-0.00122971	2.08947	-4.42803e-05
2.1516	-2.98343e-05	2.42452	-0.00123736	2.09824	-4.40504e-05
2.16014	-3.76357e-05	2.43305	-0.00124468	2.10701	-4.42701e-05
2.16867	-4.45834e-05	2.44159	-0.00125156	2.11578	-4.20584e-05
2.1772	-5.24409e-05	2.45012	-0.00125792	2.12455	-3.76679e-05
2.18574	-6.60828e-05	2.45865	-0.0012638	2.13333	-3.52405e-05
2.19427	-7.73965e-05	2.46719	-0.00126929	2.1421	-3.43255e-05
2.2028	-8.51643e-05	2.47572	-0.00127458	2.15087	-3.42256e-05
2.21134	-8.63854e-05	2.48425	-0.00127991	2.15964	-3.17138e-05
2.21987	-8.28179e-05	2.49279	-0.00128556	2.16841	-2.91437e-05
2.2284	-7.77473e-05	2.50132	-0.00129176	2.17719	-2.90694e-05
2.23694	-7.17675e-05	2.50985	-0.00129871	2.18596	-2.92074e-05
2.24547	-6.57509e-05	2.51839	-0.00130651	2.19473	-2.93453e-05
2.254	-6.15674e-05	2.52692	-0.00131518	2.2035	-2.91268e-05
2.26254	-5.93308e-05	2.53545	-0.00132463	2.21227	-2.42928e-05
2.27107	-7.69252e-05	2.54399	-0.0013347	2.22105	-2.39352e-05
2.2796	-9.35249e-05	2.55252	-0.0013452	2.22982	-2.35776e-05
2.28814	-0.000107514	2.56105	-0.00135595	2.23859	-2.3223e-05
2.29667	-0.000119531	2.56959	-0.00136675	2.24736	-2.11672e-05
2.3052	-0.00012695	2.57812	-0.00137749	2.25613	-2.08194e-05
2.31374	-0.000130974	2.58665	-0.00138806	2.26491	-2.13641e-05
2.32227	-0.000134057	2.59519	-0.0013984	2.27368	-2.13537e-05
2.3308	-0.000136626	2.60372	-0.00140847	2.28245	-2.17879e-05
2.33934	-0.000140147	2.61225	-0.00141825	2.29122	-2.04315e-05
2.34787	-0.000144765	2.62079	-0.00142772	2.29999	-1.88833e-05
2.3564	-0.000155018	2.62932	-0.00143686	2.30877	-1.95766e-05
2.36494	-0.00017177	2.63785	-0.00144569	2.31754	-1.95833e-05
2.37347	-0.000178921	2.64639	-0.00145423	2.32631	-2.0205e-05
2.382	-0.000180725	2.65492	-0.00146256	2.33508	-2.08268e-05
2.39054	-0.00018497	2.66345	-0.00147077	2.34385	-2.11834e-05
2.39907	-0.000192471	2.67199	-0.00147897	2.35263	-2.21183e-05
2.4076	-0.000196264	2.68052	-0.00148726	2.3614	-2.30532e-05
2.41614	-0.000197943	2.68905	-0.00149571	2.37017	-2.59687e-05
2.42467	-0.000199323	2.69759	-0.00150433	2.37894	-2.76284e-05
2.4332	-0.000200643	2.70612	-0.00151311	2.38771	-2.69994e-05
2.44173	-0.000195032	2.71465	-0.00152195	2.39649	-2.64896e-05
2.45027	-0.000166471	2.72319	-0.00153075	2.40526	-2.62579e-05
2.4588	-0.000134065	2.73172	-0.00153938	2.41403	-2.57624e-05
2.46733	-0.00010544	2.74025	-0.00154774	2.4228	-2.49935e-05
2.47587	-8.08684e-05	2.74879	-0.00155577	2.43157	-2.35144e-05
2.4844	-6.37574e-05	2.75732	-0.00156346	2.44035	-2.10335e-05
2.49293	-5.09575e-05	2.76585	-0.00157085	2.44912	-2.08888e-05
2.50147	-4.1486e-05	2.77439	-0.00157799	2.45789	-2.07441e-05
2.51	-3.8466e-05	2.78292	-0.00158497	2.46666	-1.92475e-05
2.51853	-2.57927e-05	2.79145	-0.00159186	2.47543	-1.40042e-05
2.52707	-1.68573e-06	2.79999	-0.0015987	2.48421	-9.19503e-06
2.5356	1.88103e-05	2.80852	-0.0016055	2.49298	-6.88459e-06
2.54413	3.36587e-05	2.81705	-0.00161225	2.50175	-4.73144e-06
2.55267	3.77572e-05	2.82559	-0.00161892	2.51052	-1.88695e-06
2.5612	9.53351e-06	2.83412	-0.00162547	2.51929	-2.34553e-06
2.56973	-1.95059e-05	2.84265	-0.00163188	2.52807	-3.02628e-06
2.57827	-2.97781e-05	2.85119	-0.00163816	2.53684	-5.94271e-06
2.5868	-3.16278e-05	2.85972	-0.00164437	2.54561	-8.85914e-06
2.59533	-2.78281e-05	2.86825	-0.00165057	2.55438	-9.22185e-06
2.60387	-2.23544e-05	2.87678	-0.00165687	2.56315	-8.8248e-06
2.6124	-1.89083e-05	2.88532	-0.00166334	2.57193	-9.2417e-06
2.62093	-1.77889e-05	2.89385	-0.00167005	2.5807	-9.65859e-06
2.62947	-2.40048e-05	2.90238	-0.00167702	2.58947	-9.48986e-06
2.638	-3.25155e-05	2.91092	-0.00168422	2.59824	-9.54979e-06
2.64653	-4.21672e-05	2.91945	-0.00169158	2.60701	-8.76314e-06
2.65507	-6.18657e-05	2.92798	-0.00169901	2.61579	-7.55849e-06
2.6636	-7.03079e-05	2.93652	-0.00170641	2.62456	-7.35149e-06
2.67213	-6.85972e-05	2.94505	-0.00171369	2.63333	-7.80494e-06
2.68067	-5.90119e-05	2.95358	-0.0017208	2.6421	-7.54652e-06
2.6892	-4.7677e-05	2.96212	-0.00172773	2.65087	-6.05483e-06
2.69773	-3.56791e-05	2.97065	-0.00173448	2.65965	-5.67474e-06
2.70627	-2.11195e-05	2.97918	-0.0017411	2.66842	-4.17532e-06
2.7148	-9.72439e-06	2.98772	-0.00174765	2.67719	-3.78263e-06
2.72333	-2.17665e-06	2.99625	-0.0017542	2.68596	-2.9355e-06
2.73187	-2.96134e-06	3.00478	-0.00176082	2.69473	-2.71053e-06
2.7404	-5.58782e-06	3.01332	-0.00176754	2.70351	-2.48555e-06
2.74893	-6.71975e-06	3.02185	-0.00177441	2.71228	-3.16036e-06
2.75747	-7.30222e-06	3.03038	-0.00178144	2.72105	-3.83517e-06
2.766	-9.25568e-06	3.03892	-0.00178866	2.72982	-2.80354e-06
2.77453	-1.27228e-05	3.04745	-0.00179608	2.73859	-2.90341e-06
2.78307	-1.63775e-05	3.05598	-0.00180377	2.74737	-3.00329e-06
2.7916	-1.99971e-05	3.06452	-0.00181178	2.75614	-3.09512e-06
2.80013	-3.10518e-05	3.07305	-0.0018202	2.76491	-3.51257e-06
2.80867	-3.80417e-05	3.08158	-0.00182912	2.77368	-3.93003e-06
2.8172	-3.55636e-05	3.09012	-0.00183864	2.78245	-2.65468e-06
2.82573	-2.93229e-05	3.09865	-0.00184879	2.79123	-2.39716e-06
2.83427	-2.25321e-05	3.10718	-0.00185957	2.8	-2.85458e-06
2.8428	-2.32437e-05	3.11572	-0.0018709	2.80877	-2.21385e-06
2.85133	-3.20066e-05	3.12425	-0.00188262	2.81754	-2.6388e-06
2.85987	-5.30781e-05	3.13278	-0.00189457	2.82631	-1.86471e-06
2.8684	-7.25867e-05	3.14132	-0.00190653	2.83509	-3.37995e-07
2.87693	-7.97718e-05	3.14985	-0.00191831	2.84386	1.20367e-06
2.88547	-8.07116e-05	3.15838	-0.00192977	2.85263	2.55926e-06
2.894	-7.71599e-05	3.16692	-0.00194083	2.8614	3.52593e-06
2.90253	-6.15532e-05	3.17545	-0.00195149	2.87017	3.59471e-06
2.91107	-3.51016e-05	3.18398	-0.00196178	2.87895	3.66349e-06
2.9196	-7.84886e-06	3.19252	-0.00197181	2.88772	3.37347e-06
2.92813	1.76238e-05	3.20105	-0.00198172	2.89649	3.21739e-06
2.93667	3.71778e-05	3.20958	-0.00199161	2.90526	2.89715e-06
2.9452	5.07143e-05	3.21812	-0.00200162	2.91403	3.3365e-06
2.95373	5.89099e-05	3.22665	-0.0020118	2.92281	6.64509e-06
2.96227	5.45273e-05	3.23518	-0.00202217	2.93158	6.21304e-06
2.9708	3.13086e-05	3.24372	-0.00203269	2.94035	5.78099e-06
2.97933	2.28419e-05	3.25225	-0.00204326	2.94912	5.19499e-06
2.98787	1.99175e-05	3.26078	-0.00205376	2.95789	4.14537e-06
2.9964	1.96155e-05	3.26932	-0.00206405	2.96667	3.09575e-06
3.00493	2.67567e-05	3.27785	-0.002074	2.97544	1.13436e-06
3.01347	3.73698e-05	3.28638	-0.00208351	2.98421	-1.74448e-06
3.022	4.50902e-05	3.29492	-0.00209255	2.99298	-6.21559e-07
3.03053	4.92941e-05	3.30345	-0.00210113	3.00175	1.29443e-07
3.03907	4.19044e-05	3.31198	-0.00210935	3.01053	-1.50179e-08
3.0476	3.38391e-05	3.32052	-0.00211733	3.0193	-1.59479e-07
3.05613	4.18034e-05	3.32905	-0.00212524	3.02807	3.42093e-07
3.06466	5.20565e-05	3.33758	-0.00213326	3.03684	-2.52853e-08
3.0732	6.15275e-05	3.34612	-0.00214153	3.04561	-1.81331e-06
3.08173	7.01076e-05	3.35465	-0.00215012	3.05439	-3.60134e-06
3.09026	7.32735e-05	3.36318	-0.00215907	3.06316	-1.77531e-06
3.0988	7.07951e-05	3.37172	-0.00216832	3.07193	-1.75265e-06
3.10733	5.86671e-05	3.38025	-0.00217778	3.0807	-1.73e-06
3.11586	4.1618e-05	3.38878	-0.00218727	3.08947	-7.70895e-07
3.1244	3.22853e-05	3.39732	-0.00219662	3.09825	-3.83852e-07
3.13293	2.6137e-05	3.40585	-0.00220563	3.10702	-8.11988e-08
3.14146	1.77675e-05	3.41438	-0.00221412	3.11579	1.33566e-07
3.15	6.7132e-06	3.42292	-0.00222191	3.12456	2.60925e-06
3.15853	1.94768e-06	3.43145	-0.00222891	3.13333	5.64223e-06
3.16706	4.31955e-06	3.43998	-0.00223504	3.14211	5.98904e-06
3.1756	8.37309e-06	3.44852	-0.00224031	3.15088	7.52597e-06
3.18413	1.05057e-05	3.45705	-0.00224477	3.15965	8.34172e-06
3.19266	1.04636e-05	3.46558	-0.00224855	3.16842	1.11996e-05
3.2012	-6.97062e-06	3.47412	-0.00225184	3.17719	1.62872e-05
3.20973	-1.89298e-05	3.48265	-0.00225484	3.18597	1.92255e-05
3.21826	-2.03132e-05	3.49118	-0.00225777	3.19474	2.32204e-05
3.2268	-1.8454e-05	3.49972	-0.00226083	3.20351	2.6287e-05
3.23533	-1.62762e-05	3.50825	-0.0022642	3.21228	2.93514e-05
3.24386	-1.47866e-05	3.51678	-0.00226804	3.22105	2.94368e-05
3.2524	-1.40514e-05	3.52531	-0.00227246	3.22983	2.90802e-05
3.26093	-1.46608e-05	3.53385	-0.00227754	3.2386	2.87237e-05
3.26946	-8.56772e-06	3.54238	-0.00228334	3.24737	2.89863e-05
3.278	5.17246e-07	3.55091	-0.00228987	3.25614	3.14886e-05
3.28653	5.37438e-06	3.55945	-0.00229713	3.26491	3.51062e-05
3.29506	5.37938e-06	3.56798	-0.00230509	3.27369	3.47167e-05
3.3036	9.92728e-06	3.57651	-0.00231366	3.28246	3.40286e-05
3.31213	2.12891e-05	3.58505	-0.00232276	3.29123	3.75514e-05
3.32066	3.49429e-05	3.59358	-0.00233228	3.3	3.74315e-05
3.3292	4.73328e-05	3.60211	-0.0023421	3.30877	3.652e-05
3.33773	5.81346e-05	3.61065	-0.00235212	3.31755	3.56085e-05
3.34626	6.43542e-05	3.61918	-0.00236226	3.32632	3.44949e-05
3.3548	6.59248e-05	3.62771	-0.00237247	3.33509	3.37421e-05
3.36333	6.80036e-05	3.63625	-0.00238272	3.34386	3.59299e-05
3.37186	7.58045e-05	3.64478	-0.00239301	3.35263	3.72544e-05
3.3804	9.08882e-05	3.65331	-0.00240333	3.36141	3.86086e-05
3.38893	0.000105552	3.66185	-0.00241371	3.37018	3.91285e-05
3.39746	0.000118578	3.67038	-0.00242415	3.37895	3.84814e-05
3.406	0.000123653	3.67891	-0.00243469	3.38772	4.09066e-05
3.41453	0.000118236	3.68745	-0.00244533	3.39649	4.02391e-05
3.42306	0.00010532	3.69598	-0.00245609	3.40527	3.91031e-05
3.4316	9.117e-05	3.70451	-0.00246701	3.41404	3.79671e-05
3.44013	7.68035e-05	3.71305	-0.00247813	3.42281	3.48222e-05
3.44866	6.49632e-05	3.72158	-0.00248948	3.43158	3.55381e-05
3.4572	6.49289e-05	3.73011	-0.00250111	3.44035	3.81815e-05
3.46573	6.88977e-05	3.73865	-0.00251306	3.44913	3.78394e-05
3.47426	7.33601e-05	3.74718	-0.00252535	3.4579	3.71096e-05
3.4828	7.71374e-05	3.75571	-0.00253796	3.46667	3.63797e-05
3.49133	8.0151e-05	3.76425	-0.00255083	3.47544	3.55687e-05
3.49986	7.98674e-05	3.77278	-0.00256387	3.48421	3.47578e-05
3.5084	7.78986e-05	3.78131	-0.00257695	3.49299	3.3037e-05
3.51693	8.54039e-05	3.78985	-0.00258992	3.50176	3.08403e-05
3.52546	9.76246e-05	3.79838	-0.00260262	3.51053	2.95206e-05
3.534	0.000108808	3.80691	-0.0026149	3.5193	3.0893e-05
3.54253	0.000118315	3.81545	-0.00262662	3.52807	3.05847e-05
3.55106	0.000121651	3.82398	-0.00263762	3.53685	3.02765e-05
3.5596	0.000135314	3.83251	-0.00264778	3.54562	3.14369e-05
3.56813	0.000154167	3.84105	-0.00265695	3.55439	3.32721e-05
3.57666	0.00016733	3.84958	-0.00266503	3.56316	3.43182e-05
3.5852	0.000173802	3.85811	-0.00267192	3.57193	3.32886e-05
3.59373	0.000154122	3.86665	-0.00267759	3.58071	3.22589e-05
3.60226	0.000128812	3.87518	-0.00268208	3.58948	3.09294e-05
3.6108	0.000116686	3.88371	-0.00268553	3.59825	2.96099e-05
3.61933	0.000114319	3.89225	-0.00268814	3.60702	2.08341e-05
3.62786	0.000112938	3.90078	-0.00269018	3.61579	2.27941e-05
3.6364	0.000111219	3.90931	-0.00269195	3.62457	2.71189e-05
3.64493	0.000107411	3.91785	-0.00269375	3.63334	3.14436e-05
3.65346	0.000101979	3.92638	-0.00269584	3.64211	3.2796e-05
3.662	0.000109884	3.93491	-0.00269843	3.65088	3.50358e-05
3.67053	0.000121877	3.94345	-0.00270167	3.65965	3.43371e-05
3.67906	0.000132289	3.95198	-0.0027056	3.66843	3.34312e-05
3.6876	0.000140689	3.96051	-0.00271022	3.6772	3.25253e-05
3.69613	0.000138021	3.96905	-0.00271546	3.68597	3.13764e-05
3.70466	0.000130993	3.97758	-0.0027212	3.69474	3.18987e-05
3.71319	0.000121307	3.98611	-0.00272733	3.70351	3.24319e-05
3.72173	0.000105442	3.99465	-0.00273371	3.71229	3.20776e-05
3.73026	9.67707e-05	4.00318	-0.00274024	3.72106	3.17233e-05
3.73879	9.33394e-05	4.01171	-0.00274683	3.72983	3.32376e-05
3.74733	9.39743e-05	4.02025	-0.00275344	3.7386	3.24448e-05
3.75586	9.57247e-05	4.02878	-0.0027601	3.74737	3.16519e-05
3.76439	9.77511e-05	4.03731	-0.00276684	3.75615	3.02693e-05
3.77293	9.74911e-05	4.04585	-0.00277374	3.76492	2.67503e-05
3.78146	9.47539e-05	4.05438	-0.00278085	3.77369	2.47365e-05
3.78999	9.84636e-05	4.06291	-0.00278825	3.78246	2.4417e-05
3.79853	0.000102299	4.07145	-0.00279595	3.79123	2.35626e-05
3.80706	0.000105	4.07998	-0.00280395	3.80001	2.27081e-05
3.81559	0.000105723	4.08851	-0.0028122	3.80878	2.25531e-05
3.82413	0.000104422	4.09705	-0.00282062	3.81755	2.29456e-05
3.83266	0.000106649	4.10558	-0.00282913	3.82632	2.16488e-05
3.84119	0.00010529	4.11411	-0.00283761	3.83509	2.0352e-05
3.84973	9.93806e-05	4.12265	-0.00284596	3.84387	1.81927e-05
3.85826	9.0062e-05	4.13118	-0.00285407	3.85264	1.42974e-05
3.86679	8.10557e-05	4.13971	-0.00286184	3.86141	1.49105e-05
3.87533	7.28988e-05	4.14824	-0.0028692	3.87018	1.42792e-05
3.88386	6.68527e-05	4.15678	-0.00287608	3.87895	1.34675e-05
3.89239	6.55304e-05	4.16531	-0.00288244	3.88773	1.26559e-05
3.90093	6.88886e-05	4.17384	-0.00288823	3.8965	1.07849e-05
3.90946	7.80954e-05	4.18238	-0.00289345	3.90527	9.45752e-06
3.91799	8.51786e-05	4.19091	-0.00289806	3.91404	8.13015e-06
3.92653	8.90291e-05	4.19944	-0.00290208	3.92281	5.27519e-06
3.93506	9.90679e-05	4.20798	-0.00290554	3.93159	1.77931e-06
3.94359	0.000110158	4.21651	-0.00290851	3.94036	5.95738e-07
3.95213	0.000119826	4.22504	-0.00291109	3.94913	-3.7956e-06
3.96066	0.000127993	4.23358	-0.00291342	3.9579	-5.75968e-06
3.96919	0.000137496	4.24211	-0.00291567	3.96667	-3.87921e-06
3.97773	0.000148211	4.25064	-0.00291803	3.97545	-3.7899e-06
3.98626	0.00015489	4.25918	-0.00292069	3.98422	-3.7006e-06
3.99479	0.000157082	4.26771	-0.00292381	3.99299	-4.20983e-06
4.00333	0.000147391	4.27624	-0.00292753	4.00176	-1.72819e-06
4.01186	0.000142284	4.28478	-0.00293196	4.01053	-1.16254e-06
4.02039	0.000140673	4.29331	-0.00293711	4.01931	-2.36343e-06
4.02893	0.000141577	4.30184	-0.00294297	4.02808	-3.56431e-06
4.03746	0.000148548	4.31038	-0.00294947	4.03685	-5.32156e-06
4.04599	0.000156108	4.31891	-0.00295649	4.04562	-2.79958e-06
4.05453	0.000173447	4.32744	-0.00296388	4.05439	-2.02096e-06
4.06306	0.000207253	4.33598	-0.00297149	4.06317	-1.24233e-06
4.07159	0.000245061	4.34451	-0.00297916	4.07194	-9.00313e-07
4.08013	0.000281157	4.35304	-0.00298675	4.08071	-1.52547e-06
4.08866	0.000309339	4.36158	-0.00299416	4.08948	-3.15329e-06
4.09719	0.00032942	4.37011	-0.00300131	4.09825	-4.78112e-06
4.10573	0.000326175	4.37864	-0.00300816	4.10703	-7.41161e-06
4.11426	0.000325195	4.38718	-0.00301468	4.1158	-9.9155e-06
4.12279	0.000327862	4.39571	-0.0030209	4.12457	-9.47737e-06
4.13133	0.000333285	4.40424	-0.00302687	4.13334	-7.79356e-06
4.13986	0.000339195	4.41278	-0.00303264	4.14211	-7.59258e-06
4.14839	0.000345191	4.42131	-0.00303832	4.15089	-7.42838e-06
4.15693	0.000369803	4.42984	-0.00304398	4.15966	-5.95642e-06
4.16546	0.000393242	4.43838	-0.00304971	4.16843	-2.03609e-06
4.17399	0.00041195	4.44691	-0.00305558	4.1772	3.56167e-06
4.18253	0.000421956	4.45544	-0.00306163	4.18597	3.182e-06
4.19106	0.0004086	4.46398	-0.0030679	4.19475	2.34795e-06
4.19959	0.000404839	4.47251	-0.00307439	4.20352	1.51389e-06
4.20813	0.000406237	4.48104	-0.0030811	4.21229	5.10744e-07
4.21666	0.000406202	4.48958	-0.00308802	4.22106	5.13524e-06
4.22519	0.000404109	4.49811	-0.00309514	4.22983	5.15498e-06
4.23373	0.000401686	4.50664	-0.00310244	4.23861	5.17473e-06
4.24226	0.000399229	4.51518	-0.0031099	4.24738	5.28134e-06
4.25079	0.000396221	4.52371	-0.00311748	4.25615	6.399e-06
4.25933	0.000398772	4.53224	-0.00312515	4.26492	1.17697e-05
4.26786	0.000395969	4.54078	-0.00313288	4.27369	1.293e-05
4.27639	0.000386385	4.54931	-0.00314061	4.28247	1.40904e-05
4.28493	0.000375679	4.55784	-0.00314833	4.29124	1.38068e-05
4.29346	0.000367796	4.56638	-0.00315602	4.30001	1.35895e-05
4.30199	0.000367023	4.57491	-0.00316366	4.30878	1.81321e-05
4.31053	0.000375703	4.58344	-0.00317127	4.31755	1.98289e-05
4.31906	0.000382111	4.59198	-0.00317882	4.32633	2.15257e-05
4.32759	0.000384542	4.60051	-0.0031863	4.3351	2.13359e-05
4.33612	0.000379977	4.60904	-0.00319367	4.34387	2.47085e-05
4.34466	0.000374334	4.61758	-0.00320087	4.35264	3.03122e-05
4.35319	0.000371135	4.62611	-0.00320787	4.36141	2.94955e-05
4.36172	0.000365089	4.63464	-0.00321461	4.37019	2.86789e-05
4.37026	0.000355547	4.64318	-0.00322108	4.37896	2.77248e-05
4.37879	0.000351536	4.65171	-0.00322728	4.38773	2.67474e-05
4.38732	0.000374644	4.66024	-0.00323329	4.3965	2.76028e-05
4.39586	0.000395255	4.66878	-0.0032392	4.40527	3.17602e-05
4.40439	0.000408329	4.67731	-0.00324514	4.41405	3.19907e-05
4.41292	0.000408276	4.68584	-0.00325124	4.42282	3.22212e-05
4.42146	0.000406538	4.69438	-0.00325764	4.43159	3.40455e-05
4.42999	0.000419736	4.70291	-0.00326441	4.44036	4.0193e-05
4.43852	0.000438154	4.71144	-0.00327161	4.44913	4.08869e-05
4.44706	0.00045336	4.71998	-0.00327921	4.45791	4.06511e-05
4.45559	0.000464637	4.72851	-0.00328717	4.46668	4.04154e-05
4.46412	0.000470326	4.73704	-0.00329539	4.47545	4.00086e-05
4.47266	0.000471571	4.74558	-0.00330375	4.48422	4.57931e-05
4.48119	0.000468997	4.75411	-0.00331213	4.49299	5.00358e-05
4.48972	0.000457005	4.76264	-0.00332043	4.50177	4.95668e-05
4.49826	0.000442779	4.77118	-0.00332857	4.51054	5.05351e-05
4.50679	0.000427336	4.77971	-0.00333651	4.51931	5.43277e-05
4.51532	0.000420076	4.78824	-0.00334424	4.52808	5.89405e-05
4.52386	0.000420687	4.79677	-0.00335179	4.53685	5.85371e-05
4.53239	0.000428153	4.80531	-0.00335925	4.54563	5.79116e-05
4.54092	0.000441455	4.81384	-0.00336673	4.5544	6.00941e-05
4.54946	0.000475579	4.82237	-0.00337435	4.56317	6.1348e-05
4.55799	0.000512197	4.83091	-0.00338227	4.57194	6.19206e-05
4.56652	0.000547755	4.83944	-0.00339063	4.58071	6.27961e-05
4.57506	0.000585121	4.84797	-0.00339953	4.58949	6.5836e-05
4.58359	0.000619031	4.85651	-0.00340907	4.59826	6.66471e-05
4.59212	0.000648881	4.86504	-0.00341927	4.60703	6.83057e-05
4.60066	0.000664557	4.87357	-0.00343013	4.6158	7.17284e-05
4.60919	0.000660946	4.88211	-0.00344157	4.62457	7.44805e-05
4.61772	0.000658691	4.89064	-0.00345349	4.63335	7.46111e-05
4.62626	0.000665723	4.89917	-0.00346573	4.64212	7.47416e-05
4.63479	0.000674109	4.90771	-0.00347812	4.65089	7.43301e-05
4.64332	0.000679527	4.91624	-0.00349047	4.65966	8.06037e-05
4.65186	0.000681796	4.92477	-0.00350262	4.66843	8.5935e-05
4.66039	0.000683654	4.93331	-0.00351444	4.67721	8.70731e-05
4.66892	0.000685389	4.94184	-0.00352585	4.68598	8.73623e-05
4.67746	0.000685976	4.95037	-0.00353682	4.69475	8.8305e-05
4.68599	0.000685356	4.95891	-0.00354738	4.70352	9.40749e-05
4.69452	0.000664581	4.96744	-0.00355758	4.71229	9.6945e-05
4.70306	0.000646775	4.97597	-0.00356754	4.72107	9.72756e-05
4.71159	0.000639901	4.98451	-0.00357737	4.72984	9.78776e-05
4.72012	0.000640494	4.99304	-0.00358719	4.73861	9.858e-05
4.72866	0.000639588	5.00157	-0.00359712	4.74738	0.000102639
4.73719	0.000636007	5.01011	-0.00360725	4.75615	0.000105208
4.74572	0.000633852	5.01864	-0.00361763	4.76493	0.000108319
4.75426	0.000636638	5.02717	-0.00362828	4.7737	0.000110681
4.76279	0.000643444	5.03571	-0.0036392	4.78247	0.000110044
4.77132	0.000651537	5.04424	-0.00365032	4.79124	0.000114787
4.77986	0.000657608	5.05277	-0.00366158	4.80001	0.000116089
4.78839	0.000661362	5.06131	-0.00367287	4.80879	0.000116207
4.79692	0.000660242	5.06984	-0.00368411	4.81756	0.000115208
4.80546	0.000650517	5.07837	-0.00369521	4.82633	0.00011421
4.81399	0.000662839	5.08691	-0.00370608	4.8351	0.000117297
4.82252	0.000679952	5.09544	-0.00371667	4.84387	0.000120757
4.83106	0.00069094	5.10397	-0.00372696	4.85265	0.000121178
4.83959	0.000695246	5.11251	-0.00373691	4.86142	0.000120724
4.84812	0.000686699	5.12104	-0.0037465	4.87019	0.000121606
4.85666	0.000680587	5.12957	-0.00375573	4.87896	0.000127143
4.86519	0.000681288	5.13811	-0.00376457	4.88773	0.000126758
4.87372	0.000682337	5.14664	-0.00377296	4.89651	0.000125772
4.88226	0.000682631	5.15517	-0.00378089	4.90528	0.000124787
4.89079	0.000682552	5.16371	-0.00378829	4.91405	0.00012356
4.89932	0.000677202	5.17224	-0.00379513	4.92282	0.000127678
4.90786	0.000666773	5.18077	-0.00380141	4.93159	0.000133323
4.91639	0.000662413	5.18931	-0.00380714	4.94037	0.000135494
4.92492	0.000679571	5.19784	-0.00381237	4.94914	0.000134835
4.93346	0.000699343	5.20637	-0.00381717	4.95791	0.000137012
4.94199	0.000715342	5.21491	-0.00382168	4.96668	0.000142617
4.95052	0.000727484	5.22344	-0.00382606	4.97545	0.000143696
4.95906	0.000729981	5.23197	-0.00383049	4.98423	0.00014343
4.96759	0.000729753	5.24051	-0.00383519	4.993	0.000142607
4.97612	0.000733649	5.24904	-0.00384039	5.00177	0.000141784
4.98465	0.000738252	5.25757	-0.0038463	5.01054	0.000144108
4.99319	0.000738773	5.26611	-0.00385313	5.01931	0.000148261
5.00172	0.000734946	5.27464	-0.003861	5.02809	0.000148412
5.01025	0.000740282	5.28317	-0.00387	5.03686	0.000148564
5.01879	0.000775661	5.29171	-0.00388014	5.04563	0.000148834
5.02732	0.000816881	5.30024	-0.00389132	5.0544	0.000153103
5.03585	0.00085029	5.30877	-0.00390342	5.06317	0.00015281
5.04439	0.00087518	5.31731	-0.00391625	5.07195	0.000152121
5.05292	0.000887472	5.32584	-0.0039296	5.08072	0.000151433
5.06145	0.000902254	5.33437	-0.00394328	5.08949	0.000152205
5.06999	0.000916986	5.34291	-0.00395714	5.09826	0.000155494
5.07852	0.000930834	5.35144	-0.00397106	5.10703	0.000158634
5.08705	0.000948213	5.35997	-0.00398498	5.11581	0.000159646
5.09559	0.000962052	5.36851	-0.00399887	5.12458	0.000160307
5.10412	0.000971415	5.37704	-0.00401271	5.13335	0.000162006
5.11265	0.000974362	5.38557	-0.00402646	5.14212	0.000166693
5.12119	0.000964647	5.39411	-0.00404008	5.15089	0.000167463
5.12972	0.000942474	5.40264	-0.00405346	5.15967	0.000167035
5.13825	0.000930035	5.41117	-0.00406651	5.16844	0.000166608
5.14679	0.000933529	5.4197	-0.0040791	5.17721	0.000169218
5.15532	0.000938361	5.42824	-0.00409115	5.18598	0.000173042
5.16385	0.000942025	5.43677	-0.00410262	5.19475	0.000175838
5.17239	0.000940875	5.4453	-0.00411351	5.20352	0.000177748
5.18092	0.000945498	5.45384	-0.00412388	5.2123	0.000178796
5.18945	0.000953217	5.46237	-0.00413383	5.22107	0.000178415
5.19799	0.000961042	5.4709	-0.00414345	5.22984	0.000182077
5.20652	0.000964732	5.47944	-0.00415282	5.23861	0.000182322
5.21505	0.000964043	5.48797	-0.00416198	5.24738	0.000182568
5.22359	0.00095367	5.4965	-0.00417094	5.25616	0.000182364
5.23212	0.000933635	5.50504	-0.00417966	5.26493	0.000183638
5.24065	0.000923631	5.51357	-0.00418812	5.2737	0.000185748
5.24919	0.000918004	5.5221	-0.0041963	5.28247	0.000189648
5.25772	0.000901402	5.53064	-0.00420419	5.29124	0.000190348
5.26625	0.000872626	5.53917	-0.00421186	5.30002	0.000190453
5.27479	0.000860797	5.5477	-0.00421939	5.30879	0.000190718
5.28332	0.00085395	5.55624	-0.00422688	5.31756	0.000190229
5.29185	0.000844349	5.56477	-0.00423445	5.32633	0.000189356
5.30039	0.000831484	5.5733	-0.00424221	5.3351	0.000188484
5.30892	0.000813653	5.58184	-0.00425023	5.34388	0.000184532
5.31745	0.000786566	5.59037	-0.00425857	5.35265	0.000181923
5.32599	0.000761096	5.5989	-0.00426725	5.36142	0.00018361
5.33452	0.000760989	5.60744	-0.00427623	5.37019	0.000183005
5.34305	0.000763807	5.61597	-0.00428544	5.37896	0.000182228
5.35159	0.000765118	5.6245	-0.0042948	5.38774	0.000181451
5.36012	0.00075916	5.63304	-0.00430418	5.39651	0.000183963
5.36865	0.000751656	5.64157	-0.00431348	5.40528	0.000189104
5.37719	0.000750369	5.6501	-0.00432264	5.41405	0.0001883
5.38572	0.000749188	5.65864	-0.0043316	5.42282	0.000187497
5.39425	0.000746952	5.66717	-0.00434036	5.4316	0.000186158
5.40279	0.000745543	5.6757	-0.00434896	5.44037	0.000184862
5.41132	0.000747731	5.68424	-0.00435748	5.44914	0.000189401
5.41985	0.000750402	5.69277	-0.00436601	5.45791	0.000193066
5.42839	0.00075295	5.7013	-0.00437465	5.46668	0.000192929
5.43692	0.000759285	5.70984	-0.00438345	5.47546	0.000193157
5.44545	0.000760388	5.71837	-0.0043925	5.48423	0.000195296
5.45399	0.00075519	5.7269	-0.00440182	5.493	0.000197297
5.46252	0.000748239	5.73544	-0.00441142	5.50177	0.00019778
5.47105	0.000757158	5.74397	-0.00442127	5.51054	0.000196878
5.47959	0.000768545	5.7525	-0.00443134	5.51932	0.000195977
5.48812	0.000772142	5.76104	-0.00444157	5.52809	0.000197116
5.49665	0.000767468	5.76957	-0.00445192	5.53686	0.000200724
5.50519	0.000753504	5.7781	-0.00446233	5.54563	0.000202071
5.51372	0.000730892	5.78664	-0.00447275	5.5544	0.000201613
5.52225	0.000690823	5.79517	-0.00448314	5.56318	0.000201156
5.53079	0.000667381	5.8037	-0.00449347	5.57195	0.000201927
5.53932	0.000659646	5.81224	-0.00450371	5.58072	0.000203468
5.54785	0.000665077	5.82077	-0.00451385	5.58949	0.000203659
5.55639	0.0006822	5.8293	-0.00452388	5.59826	0.000202738
5.56492	0.000702312	5.83784	-0.0045338	5.60704	0.000201818
5.57345	0.000728177	5.84637	-0.00454361	5.61581	0.000200428
5.58199	0.000759951	5.8549	-0.00455331	5.62458	0.000200866
5.59052	0.000783688	5.86344	-0.00456293	5.63335	0.000205014
5.59905	0.000797896	5.87197	-0.00457245	5.64212	0.000206947
5.60758	0.00078631	5.8805	-0.00458186	5.6509	0.000207397
5.61612	0.000771764	5.88904	-0.00459111	5.65967	0.000210742
5.62465	0.00075861	5.89757	-0.00460016	5.66844	0.000213626
5.63318	0.000737795	5.9061	-0.00460894	5.67721	0.000215618
5.64172	0.000723783	5.91464	-0.00461739	5.68598	0.000218593
5.65025	0.000724464	5.92317	-0.00462549	5.69476	0.000220193
5.65878	0.000732847	5.9317	-0.00463318	5.70353	0.000221908
5.66732	0.000743611	5.94024	-0.00464045	5.7123	0.000225715
5.67585	0.000754218	5.94877	-0.0046473	5.72107	0.000229742
5.68438	0.000747818	5.9573	-0.0046537	5.72984	0.000232864
5.69292	0.000723318	5.96584	-0.00465961	5.73862	0.00023235
5.70145	0.000706669	5.97437	-0.00466499	5.74739	0.000235688
5.70998	0.000713702	5.9829	-0.00466979	5.75616	0.000241137
5.71852	0.000743235	5.99144	-0.00467397	5.76493	0.000243364
5.72705	0.000767464	5.99997	-0.00467753	5.7737	0.000243729
5.73558	0.000782537	6.0085	-0.00468054	5.78248	0.000244093
5.74412	0.000793325	6.01704	-0.00468313	5.79125	0.000245171
5.75265	0.000796281	6.02557	-0.0046855	5.80002	0.000248037
5.76118	0.000791413	6.0341	-0.00468791	5.80879	0.000251206
5.76972	0.000773436	6.04264	-0.00469064	5.81756	0.000252462
5.77825	0.000757532	6.05117	-0.00469396	5.82634	0.000253717
5.78678	0.000775676	6.0597	-0.00469807	5.83511	0.000253356
5.79532	0.000792973	6.06823	-0.0047031	5.84388	0.000257022
5.80385	0.000803142	6.07677	-0.00470907	5.85265	0.000259184
5.81238	0.000788462	6.0853	-0.00471593	5.86142	0.000258978
5.82092	0.000771394	6.09383	-0.00472351	5.8702	0.000258772
5.82945	0.000755953	6.10237	-0.00473161	5.87897	0.000258899
5.83798	0.000741925	6.1109	-0.00474	5.88774	0.000261605
5.84652	0.000720062	6.11943	-0.00474845	5.89651	0.000264233
5.85505	0.000695312	6.12797	-0.00475677	5.90528	0.000265437
5.86358	0.000668964	6.1365	-0.0047648	5.91406	0.00026713
5.87212	0.000652259	6.14503	-0.00477246	5.92283	0.000269152
5.88065	0.000701185	6.15357	-0.00477973	5.9316	0.000270876
5.88918	0.000755477	6.1621	-0.00478663	5.94037	0.000271509
5.89772	0.000803578	6.17063	-0.00479321	5.94914	0.00027108
5.90625	0.000843735	6.17917	-0.00479959	5.95792	0.000270238
5.91478	0.000828653	6.1877	-0.00480586	5.96669	0.000269396
5.92332	0.000810083	6.19623	-0.00481214	5.97546	0.000271769
5.93185	0.000815001	6.20477	-0.00481851	5.98423	0.000276958
5.94038	0.000824725	6.2133	-0.00482501	5.993	0.000276741
5.94892	0.000829164	6.22183	-0.00483163	6.00178	0.000276523
5.95745	0.000827782	6.23037	-0.00483834	6.01055	0.000279102
5.96598	0.000824247	6.2389	-0.00484504	6.01932	0.00028046
5.97452	0.000819323	6.24743	-0.00485163	6.02809	0.000280557
5.98305	0.000806205	6.25597	-0.00485805	6.03686	0.000279339
5.99158	0.000794814	6.2645	-0.00486426	6.04564	0.000278121
6.00012	0.00078537	6.27303	-0.00487029	6.05441	0.00027685
6.00865	0.000772622	6.28157	-0.00487623	6.06318	0.000279619
6.01718	0.000756083	6.2901	-0.00488222	6.07195	0.00027982
6.02572	0.000756696	6.29863	-0.00488844	6.08072	0.00028002
6.03425	0.000765778	6.30717	-0.00489507	6.0895	0.000279639
6.04278	0.000766815	6.3157	-0.00490224	6.09827	0.000278914
6.05132	0.000758251	6.32423	-0.00491003	6.10704	0.000279061
6.05985	0.000757201	6.33277	-0.00491845	6.11581	0.0002789
6.06838	0.000759939	6.3413	-0.00492741	6.12458	0.000278632
6.07692	0.00075563	6.34983	-0.00493676	6.13336	0.000277986
6.08545	0.000743372	6.35837	-0.00494628	6.14213	0.00027734
6.09398	0.00072999	6.3669	-0.00495576	6.1509	0.000278225
6.10252	0.000723453	6.37543	-0.00496496	6.15967	0.000280655
6.11105	0.00072423	6.38397	-0.00497372	6.16844	0.000280686
6.11958	0.000726219	6.3925	-0.00498194	6.17722	0.000279999
6.12812	0.00072837	6.40103	-0.00498956	6.18599	0.000279226
6.13665	0.000743802	6.40957	-0.00499664	6.19476	0.000278452
6.14518	0.000775234	6.4181	-0.00500328	6.20353	0.000277592
6.15372	0.000798546	6.42663	-0.00500963	6.2123	0.00027532
6.16225	0.000810617	6.43517	-0.00501587	6.22108	0.000274508
6.17078	0.000800138	6.4437	-0.00502219	6.22985	0.000271836
6.17932	0.000780867	6.45223	-0.00502873	6.23862	0.000271815
6.18785	0.00075711	6.46077	-0.00503564	6.24739	0.000273257
6.19638	0.000745424	6.4693	-0.005043	6.25616	0.000273544
6.20492	0.000753466	6.47783	-0.00505086	6.26494	0.000273832
6.21345	0.000771425	6.48637	-0.0050592	6.27371	0.000272842
6.22198	0.000796726	6.4949	-0.005068	6.28248	0.000271851
6.23052	0.000839815	6.50343	-0.00507719	6.29125	0.000270173
6.23905	0.000887406	6.51197	-0.00508672	6.30002	0.000267487
6.24758	0.00092833	6.5205	-0.00509654	6.3088	0.000262293
6.25611	0.000961822	6.52903	-0.00510663	6.31757	0.000259056
6.26465	0.0009558	6.53757	-0.00511701	6.32634	0.000258001
6.27318	0.000911115	6.5461	-0.00512772	6.33511	0.000256945
6.28171	0.000852075	6.55463	-0.00513883	6.34388	0.000255529
6.29025	0.000818344	6.56317	-0.00515038	6.35266	0.000252998
6.29878	0.000813779	6.5717	-0.00516241	6.36143	0.000251806
6.30731	0.00081462	6.58023	-0.00517491	6.3702	0.000248926
6.31585	0.000841333	6.58877	-0.00518781	6.37897	0.00024304
6.32438	0.000877633	6.5973	-0.00520101	6.38774	0.000239575
6.33291	0.00089175	6.60583	-0.00521436	6.39652	0.000236617
6.34145	0.000881205	6.61437	-0.00522769	6.40529	0.000231491
6.34998	0.000860894	6.6229	-0.00524084	6.41406	0.000228637
6.35851	0.000856107	6.63143	-0.00525368	6.42283	0.000227001
6.36705	0.000856383	6.63997	-0.00526609	6.4316	0.000223703
6.37558	0.000842007	6.6485	-0.00527801	6.44038	0.000219794
6.38411	0.000811589	6.65703	-0.00528942	6.44915	0.000217084
6.39265	0.000796637	6.66557	-0.00530033	6.45792	0.000215478
6.40118	0.000792386	6.6741	-0.00531078	6.46669	0.000211282
6.40971	0.000824534	6.68263	-0.00532086	6.47546	0.000207145
6.41825	0.000864922	6.69116	-0.00533064	6.48424	0.000202289
6.42678	0.000903152	6.6997	-0.00534024	6.49301	0.000196518
6.43531	0.000907517	6.70823	-0.00534976	6.50178	0.000193973
6.44385	0.000876151	6.71676	-0.00535933	6.51055	0.000191431
6.45238	0.000838012	6.7253	-0.00536909	6.51932	0.000188393
6.46091	0.000832006	6.73383	-0.00537918	6.5281	0.000185745
6.46945	0.000827612	6.74236	-0.00538974	6.53687	0.000181439
6.47798	0.00081893	6.7509	-0.00540088	6.54564	0.000175783
6.48651	0.000798354	6.75943	-0.0054127	6.55441	0.000170935
6.49505	0.000784023	6.76796	-0.00542525	6.56318	0.000166798
6.50358	0.000802405	6.7765	-0.00543856	6.57196	0.000161478
6.51211	0.00083079	6.78503	-0.00545258	6.58073	0.000157935
6.52065	0.000850422	6.79356	-0.00546725	6.5895	0.000154821
6.52918	0.000859857	6.8021	-0.00548248	6.59827	0.000149612
6.53771	0.000853256	6.81063	-0.00549812	6.60704	0.000146748
6.54625	0.000888627	6.81916	-0.00551405	6.61582	0.000144609
6.55478	0.000932153	6.8277	-0.00553009	6.62459	0.000141694
6.56331	0.000973101	6.83623	-0.00554608	6.63336	0.000137466
6.57185	0.00100707	6.84476	-0.00556185	6.64213	0.000130721
6.58038	0.00103408	6.8533	-0.00557724	6.6509	0.000124595
6.58891	0.00105069	6.86183	-0.00559208	6.65968	0.000118868
6.59745	0.00104709	6.87036	-0.00560625	6.66845	0.000114791
6.60598	0.00104368	6.8789	-0.00561962	6.67722	0.000111509
6.61451	0.00103923	6.88743	-0.00563209	6.68599	0.000107799
6.62305	0.00103305	6.89596	-0.00564357	6.69476	0.000105237
6.63158	0.00102676	6.9045	-0.00565398	6.70354	0.00010219
6.64011	0.00102883	6.91303	-0.00566325	6.71231	9.83181e-05
6.64865	0.00104278	6.92156	-0.00567135	6.72108	9.20924e-05
6.65718	0.0010616	6.9301	-0.0056782	6.72985	8.47195e-05
6.66571	0.00106179	6.93863	-0.00568379	6.73862	8.06325e-05
6.67425	0.00104148	6.94716	-0.00568811	6.7474	7.52619e-05
6.68278	0.00100423	6.9557	-0.00569119	6.75617	6.94673e-05
6.69131	0.00100336	6.96423	-0.0056931	6.76494	6.50299e-05
6.69985	0.00100647	6.97276	-0.00569396	6.77371	6.13165e-05
6.70838	0.00100657	6.9813	-0.00569393	6.78248	6.00581e-05
6.71691	0.000994659	6.98983	-0.0056932	6.79126	5.77598e-05
6.72545	0.000981666	6.99836	-0.00569196	6.80003	5.60327e-05
6.73398	0.000972716	7.0069	-0.00569042	6.8088	5.34863e-05
6.74251	0.00096646	7.01543	-0.00568874	6.81757	4.7665e-05
6.75105	0.000962356	7.02396	-0.00568707	6.82634	4.47543e-05
6.75958	0.000952092	7.0325	-0.00568551	6.83512	4.09641e-05
6.76811	0.000934894	7.04103	-0.00568413	6.84389	3.53956e-05
6.77665	0.00089691	7.04956	-0.00568296	6.85266	3.36757e-05
6.78518	0.00084854	7.0581	-0.00568202	6.86143	3.12569e-05
6.79371	0.000819047	7.06663	-0.00568133	6.8702	2.78346e-05
6.80225	0.000814135	7.07516	-0.00568091	6.87898	2.44433e-05
6.81078	0.000813971	7.0837	-0.00568079	6.88775	1.9838e-05
6.81931	0.000807756	7.09223	-0.00568106	6.89652	1.56551e-05
6.82785	0.000794881	7.10076	-0.00568179	6.90529	1.283e-05
6.83638	0.000777968	7.1093	-0.0056831	6.91406	9.52728e-06
6.84491	0.000752019	7.11783	-0.00568511	6.92284	6.54045e-06
6.85345	0.000757058	7.12636	-0.00568794	6.93161	4.33826e-06
6.86198	0.000788116	7.1349	-0.00569167	6.94038	3.82523e-06
6.87051	0.000828956	7.14343	-0.00569637	6.94915	4.97231e-06
6.87904	0.000844611	7.15196	-0.00570208	6.95792	5.19686e-06
6.88758	0.000832182	7.1605	-0.00570876	6.9667	4.90591e-06
6.89611	0.000806964	7.16903	-0.00571639	6.97547	6.69355e-06
6.90464	0.000769685	7.17756	-0.00572488	6.98424	6.81742e-06
6.91318	0.000719912	7.1861	-0.00573414	6.99301	6.07832e-06
6.92171	0.000704814	7.19463	-0.00574407	7.00178	5.30335e-06
6.93024	0.000737311	7.20316	-0.00575459	7.01056	4.52838e-06
6.93878	0.000772393	7.2117	-0.00576561	7.01933	4.66733e-06
6.94731	0.000802532	7.22023	-0.00577706	7.0281	4.39942e-06
6.95584	0.000820955	7.22876	-0.00578887	7.03687	3.52495e-06
6.96438	0.000808994	7.2373	-0.00580098	7.04564	2.65048e-06
6.97291	0.000778698	7.24583	-0.00581331	7.05442	1.17714e-06
6.98144	0.000749641	7.25436	-0.00582575	7.06319	-4.34307e-07
6.98998	0.000737739	7.2629	-0.00583818	7.07196	-1.23493e-06
6.99851	0.000743493	7.27143	-0.00585046	7.08073	-2.03556e-06
7.00704	0.00075756	7.27996	-0.00586245	7.0895	-5.30491e-06
7.01558	0.000783732	7.2885	-0.00587399	7.09828	-7.2731e-06
7.02411	0.000812743	7.29703	-0.00588497	7.10705	-9.60994e-06
7.03264	0.000830469	7.30556	-0.00589527	7.11582	-9.7973e-06
7.04118	0.000835954	7.3141	-0.00590484	7.12459	-1.03976e-05
7.04971	0.000850291	7.32263	-0.00591365	7.13336	-1.15431e-05
7.05824	0.000869383	7.33116	-0.00592169	7.14214	-1.26887e-05
7.06678	0.000891572	7.33969	-0.00592898	7.15091	-1.20453e-05
7.07531	0.000923194	7.34823	-0.00593554	7.15968	-9.24001e-06
7.08384	0.000953478	7.35676	-0.00594142	7.16845	-9.7829e-06
7.09238	0.000974948	7.36529	-0.00594663	7.17722	-1.06225e-05
7.10091	0.000987551	7.37383	-0.00595122	7.186	-1.14622e-05
7.10944	0.000986531	7.38236	-0.00595525	7.19477	-1.07174e-05
7.11798	0.000965776	7.39089	-0.0059588	7.20354	-8.61776e-06
7.12651	0.000945943	7.39943	-0.00596196	7.21231	-9.45151e-06
7.13504	0.000929016	7.40796	-0.0059649	7.22108	-1.02853e-05
7.14358	0.000904625	7.41649	-0.00596775	7.22986	-1.13858e-05
7.15211	0.000871843	7.42503	-0.0059707	7.23863	-1.13038e-05
7.16064	0.000858018	7.43356	-0.00597392	7.2474	-1.17834e-05
7.16918	0.000848737	7.44209	-0.00597756	7.25617	-1.44635e-05
7.17771	0.000840551	7.45063	-0.00598176	7.26494	-1.71437e-05
7.18624	0.00083768	7.45916	-0.00598659	7.27372	-1.90908e-05
7.19478	0.000833772	7.46769	-0.00599207	7.28249	-2.04913e-05
7.20331	0.000827795	7.47623	-0.00599818	7.29126	-2.18918e-05
7.21184	0.000806151	7.48476	-0.00600482	7.30003	-2.29373e-05
7.22038	0.000792402	7.49329	-0.00601185	7.3088	-2.39828e-05
7.22891	0.00078996	7.50183	-0.00601913	7.31758	-2.5441e-05
7.23744	0.000802256	7.51036	-0.00602649	7.32635	-2.64468e-05
7.24598	0.000823523	7.51889	-0.00603379	7.33512	-2.74527e-05
7.25451	0.000844194	7.52743	-0.00604091	7.34389	-2.88832e-05
7.26304	0.000862979	7.53596	-0.00604778	7.35266	-3.46965e-05
7.27158	0.00088069	7.54449	-0.00605435	7.36144	-3.84045e-05
7.28011	0.000883918	7.55303	-0.00606062	7.37021	-3.92892e-05
7.28864	0.00087183	7.56156	-0.0060666	7.37898	-3.95833e-05
7.29718	0.000821822	7.57009	-0.00607232	7.38775	-4.03812e-05
7.30571	0.000785281	7.57863	-0.00607781	7.39652	-4.11791e-05
7.31424	0.000761716	7.58716	-0.00608313	7.4053	-4.22255e-05
7.32278	0.000742471	7.59569	-0.00608833	7.41407	-4.38383e-05
7.33131	0.000724212	7.60423	-0.00609346	7.42284	-4.54512e-05
7.33984	0.000706512	7.61276	-0.00609857	7.43161	-4.83446e-05
7.34838	0.000688618	7.62129	-0.0061037	7.44038	-5.36855e-05
7.35691	0.000667082	7.62983	-0.00610891	7.44916	-5.78023e-05
7.36544	0.000649457	7.63836	-0.00611421	7.45793	-6.05255e-05
7.37398	0.000632294	7.64689	-0.00611965	7.4667	-6.15086e-05
7.38251	0.000614761	7.65543	-0.00612522	7.47547	-6.24917e-05
7.39104	0.000590759	7.66396	-0.00613094	7.48424	-6.53189e-05
7.39958	0.000556869	7.67249	-0.0061368	7.49302	-6.76227e-05
7.40811	0.000525288	7.68103	-0.00614277	7.50179	-6.91769e-05
7.41664	0.000511588	7.68956	-0.00614883	7.51056	-7.07311e-05
7.42518	0.000511365	7.69809	-0.00615496	7.51933	-7.62567e-05
7.43371	0.000522339	7.70663	-0.00616116	7.5281	-8.22637e-05
7.44224	0.000534484	7.71516	-0.00616745	7.53688	-8.6818e-05
7.45078	0.000535705	7.72369	-0.00617388	7.54565	-8.79671e-05
7.45931	0.000525335	7.73223	-0.00618052	7.55442	-8.91162e-05
7.46784	0.000490591	7.74076	-0.00618746	7.56319	-9.11914e-05
7.47638	0.000458388	7.74929	-0.00619479	7.57196	-9.43184e-05
7.48491	0.000433133	7.75783	-0.00620263	7.58074	-9.85095e-05
7.49344	0.000419913	7.76636	-0.00621104	7.58951	-0.000100255
7.50198	0.000413675	7.77489	-0.00622011	7.59828	-0.000102351
7.51051	0.000412819	7.78343	-0.00622988	7.60705	-0.000104447
7.51904	0.000422695	7.79196	-0.00624034	7.61582	-0.00011153
7.52757	0.000445638	7.80049	-0.00625147	7.6246	-0.000117239
7.53611	0.000472865	7.80903	-0.00626318	7.63337	-0.0001197
7.54464	0.000493367	7.81756	-0.00627531	7.64214	-0.000122162
7.55317	0.000506246	7.82609	-0.00628766	7.65091	-0.00012636
7.56171	0.000473595	7.83463	-0.0063	7.65968	-0.000129086
7.57024	0.000443756	7.84316	-0.00631209	7.66846	-0.000132959
7.57877	0.000430531	7.85169	-0.0063237	7.67723	-0.000135166
7.58731	0.00042577	7.86023	-0.00633468	7.686	-0.000136891
7.59584	0.000421476	7.86876	-0.00634492	7.69477	-0.000144444
7.60437	0.000416579	7.87729	-0.00635439	7.70354	-0.000150175
7.61291	0.000405317	7.88583	-0.00636312	7.71232	-0.000156576
7.62144	0.000385981	7.89436	-0.0063712	7.72109	-0.000162747
7.62997	0.000410397	7.90289	-0.00637872	7.72986	-0.000164643
7.63851	0.000444912	7.91143	-0.00638583	7.73863	-0.00016922
7.64704	0.000481835	7.91996	-0.00639267	7.7474	-0.000175695
7.65557	0.000511402	7.92849	-0.00639938	7.75618	-0.000179933
7.66411	0.000532723	7.93703	-0.00640614	7.76495	-0.000181021
7.67264	0.000539172	7.94556	-0.0064131	7.77372	-0.000184059
7.68117	0.000545615	7.95409	-0.00642045	7.78249	-0.00019206
7.68971	0.000543859	7.96262	-0.00642833	7.79126	-0.000200219
7.69824	0.000532891	7.97116	-0.00643688	7.80004	-0.00020598
7.70677	0.000500062	7.97969	-0.00644619	7.80881	-0.000210286
7.71531	0.000458289	7.98822	-0.00645634	7.81758	-0.000213418
7.72384	0.000404694	7.99676	-0.00646735	7.82635	-0.000218364
7.73237	0.00034328	8.00529	-0.00647919	7.83512	-0.000226114
7.74091	0.000308029	8.01382	-0.00649182	7.8439	-0.000231575
7.74944	0.00028891	8.02236	-0.00650515	7.85267	-0.00023428
7.75797	0.000268997	8.03089	-0.00651906	7.86144	-0.000237452
7.76651	0.000246108	8.03942	-0.00653343	7.87021	-0.000243028
7.77504	0.000230408	8.04796	-0.0065481	7.87898	-0.000250759
7.78357	0.000233185	8.05649	-0.00656287	7.88776	-0.000256586
7.79211	0.00025429	8.06502	-0.00657757	7.89653	-0.000260041
7.80064	0.000269933	8.07356	-0.00659198	7.9053	-0.000264929
7.80917	0.000276857	8.08209	-0.00660589	7.91407	-0.000269625
7.81771	0.00026618	8.09062	-0.00661909	7.92284	-0.000276765
7.82624	0.000256982	8.09916	-0.0066314	7.93162	-0.000283814
7.83477	0.000253873	8.10769	-0.00664263	7.94039	-0.000284593
7.84331	0.000252434	8.11622	-0.00665267	7.94916	-0.000286698
7.85184	0.000250234	8.12476	-0.00666145	7.95793	-0.000294653
7.86037	0.000247075	8.13329	-0.00666897	7.9667	-0.000303093
7.86891	0.000224331	8.14182	-0.00667529	7.97548	-0.000307383
7.87744	0.000207966	8.15036	-0.00668059	7.98425	-0.000310372
7.88597	0.000192594	8.15889	-0.00668506	7.99302	-0.000313237
7.89451	0.000176427	8.16742	-0.00668897	8.00179	-0.000315253
7.90304	0.000141224	8.17596	-0.00669262	8.01056	-0.000319413
7.91157	0.000119256	8.18449	-0.00669628	8.01934	-0.000324108
7.92011	0.000110548	8.19302	-0.00670021	8.02811	-0.000325151
7.92864	0.000100207	8.20156	-0.00670461	8.03688	-0.000326194
7.93717	8.61861e-05	8.21009	-0.00670965	8.04565	-0.000333007
7.94571	7.05451e-05	8.21862	-0.00671544	8.05442	-0.00033966
7.95424	6.77364e-05	8.22716	-0.00672205	8.0632	-0.000345925
7.96277	7.88553e-05	8.23569	-0.00672952	8.07197	-0.000349956
7.97131	0.000111284	8.24422	-0.00673787	8.08074	-0.000353799
7.97984	0.000146752	8.25276	-0.0067471	8.08951	-0.000360488
7.98837	0.000176746	8.26129	-0.00675718	8.09828	-0.000368554
7.99691	0.000200944	8.26982	-0.00676807	8.10706	-0.000375206
8.00544	0.000232147	8.27836	-0.00677966	8.11583	-0.000377908
8.01397	0.000261713	8.28689	-0.00679183	8.1246	-0.000380383
8.02251	0.00028806	8.29542	-0.00680442	8.13337	-0.000387372
8.03104	0.000297709	8.30396	-0.00681721	8.14214	-0.00039408
8.03957	0.000280823	8.31249	-0.00683002	8.15092	-0.000402835
8.04811	0.000257945	8.32102	-0.00684265	8.15969	-0.000409055
8.05664	0.00024059	8.32956	-0.00685496	8.16846	-0.000411384
8.06517	0.000242344	8.33809	-0.00686682	8.17723	-0.000413713
8.07371	0.000252345	8.34662	-0.00687815	8.186	-0.000420598
8.08224	0.000267781	8.35516	-0.00688888	8.19478	-0.000423225
8.09077	0.000275395	8.36369	-0.00689898	8.20355	-0.00042443
8.09931	0.000273793	8.37222	-0.00690841	8.21232	-0.000429706
8.10784	0.000248261	8.38076	-0.00691715	8.22109	-0.000433113
8.11637	0.000233473	8.38929	-0.00692521	8.22986	-0.000437421
8.12491	0.000240039	8.39782	-0.00693261	8.23864	-0.000444772
8.13344	0.000250455	8.40636	-0.00693944	8.24741	-0.000445033
8.14197	0.000261479	8.41489	-0.00694578	8.25618	-0.000445741
8.1505	0.000272019	8.42342	-0.00695179	8.26495	-0.00044676
8.15904	0.000293113	8.43196	-0.00695763	8.27372	-0.00044778
8.16757	0.000316344	8.44049	-0.00696346	8.2825	-0.000449531
8.1761	0.000335248	8.44902	-0.00696945	8.29127	-0.000450955
8.18464	0.000349474	8.45756	-0.00697572	8.30004	-0.000453511
8.19317	0.000346409	8.46609	-0.00698235	8.30881	-0.000456067
8.2017	0.000345427	8.47462	-0.00698941	8.31758	-0.000461813
8.21024	0.000338834	8.48316	-0.00699691	8.32636	-0.000466186
8.21877	0.000325281	8.49169	-0.00700481	8.33513	-0.000467441
8.2273	0.000304435	8.50022	-0.00701306	8.3439	-0.000468503
8.23584	0.000275908	8.50876	-0.00702158	8.35267	-0.000469566
8.24437	0.000262302	8.51729	-0.00703028	8.36144	-0.000471176
8.2529	0.000259963	8.52582	-0.00703906	8.37022	-0.000475498
8.26144	0.000257758	8.53436	-0.00704782	8.37899	-0.000476863
8.26997	0.000254106	8.54289	-0.00705646	8.38776	-0.000478229
8.2785	0.00024574	8.55142	-0.00706492	8.39653	-0.000481044
8.28704	0.000227237	8.55996	-0.00707316	8.4053	-0.000485851
8.29557	0.000234646	8.56849	-0.00708114	8.41408	-0.000493465
8.3041	0.000273523	8.57702	-0.00708887	8.42285	-0.000495952
8.31264	0.000319665	8.58556	-0.00709637	8.43162	-0.000496958
8.32117	0.000368594	8.59409	-0.00710368	8.44039	-0.000504141
8.3297	0.000414304	8.60262	-0.00711083	8.44916	-0.000510041
8.33824	0.000445832	8.61115	-0.00711784	8.45794	-0.000514456
8.34677	0.00046288	8.61969	-0.00712472	8.46671	-0.000517221
8.3553	0.000472412	8.62822	-0.00713147	8.47548	-0.000520271
8.36384	0.000476158	8.63675	-0.00713809	8.48425	-0.000527148
8.37237	0.000452133	8.64529	-0.00714455	8.49302	-0.000534262
8.3809	0.000458698	8.65382	-0.00715087	8.5018	-0.000540947
8.38944	0.00055826	8.66235	-0.00715703	8.51057	-0.000543215
8.39797	0.000645251	8.67089	-0.00716306	8.51934	-0.000545042
8.4065	0.00070259	8.67942	-0.00716897	8.52811	-0.00054687
8.41504	0.000713478	8.68795	-0.00717477	8.53688	-0.000549803
8.42357	0.000733611	8.69649	-0.00718047	8.54566	-0.00055272
8.4321	0.000860654	8.70502	-0.00718608	8.55443	-0.000554199
8.44064	0.000996229	8.71355	-0.00719161	8.5632	-0.000555677
8.44917	0.00111631	8.72209	-0.00719707	8.57197	-0.000558557
8.4577	0.00122163	8.73062	-0.00720248	8.58074	-0.000562736
8.46624	0.00131178	8.73915	-0.00720788	8.58952	-0.000566872
8.47477	0.00139297	8.74769	-0.00721335	8.59829	-0.00056778
8.4833	0.00154182	8.75622	-0.00721899	8.60706	-0.000567404
8.49184	0.00171853	8.76475	-0.00722494	8.61583	-0.000567989
8.50037	0.00187909	8.77329	-0.00723134	8.6246	-0.000570214
8.5089	0.00201944	8.78182	-0.00723835	8.63338	-0.000572439
8.51744	0.00213556	8.79035	-0.00724608	8.64215	-0.00057319
8.52597	0.0022298	8.79889	-0.00725463	8.65092	-0.000574624
8.5345	0.00235316	8.80742	-0.00726398	8.65969	-0.000576057
8.54304	0.00264275	8.81595	-0.00727411	8.66846	-0.000578307
8.55157	0.00294676	8.82449	-0.00728489	8.67724	-0.00058427
8.5601	0.00323623	8.83302	-0.00729616	8.68601	-0.00058575
8.56864	0.00360343	8.84155	-0.00730775	8.69478	-0.000585194
8.57717	0.0040871	8.85009	-0.00731948	8.70355	-0.000585336
8.5857	0.00454094	8.85862	-0.00733119	8.71232	-0.000586181
8.59424	0.00494373	8.86715	-0.00734275	8.7211	-0.000587026
8.60277	0.00527614	8.87569	-0.00735407	8.72987	-0.000588403
8.6113	0.00571414	8.88422	-0.0073651	8.73864	-0.000589571
8.61984	0.00624671	8.89275	-0.00737582	8.74741	-0.000590739
8.62837	0.00675831	8.90129	-0.00738621	8.75618	-0.000593837
8.6369	0.00723367	8.90982	-0.00739631	8.76496	-0.000598008
8.64544	0.00785435	8.91835	-0.00740612	8.77373	-0.000601017
8.65397	0.00866085	8.92689	-0.00741567	8.7825	-0.000601774
8.6625	0.00965398	8.93542	-0.00742501	8.79127	-0.00060253
8.67104	0.0109341	8.94395	-0.00743417	8.80004	-0.000604331
8.67957	0.012157	8.95249	-0.00744322	8.80882	-0.000607904
8.6881	0.0134111	8.96102	-0.00745221	8.81759	-0.0006087
8.69664	0.0148883	8.96955	-0.0074612	8.82636	-0.000609497
8.70517	0.0163471	8.97809	-0.0074702	8.83513	-0.000615317
8.7137	0.0179069	8.98662	-0.00747925	8.8439	-0.000622777
8.72224	0.0195721	8.99515	-0.00748833	8.85268	-0.000627908
8.73077	0.021482	9.00369	-0.00749743	8.86145	-0.00063004
8.7393	0.0235507	9.01222	-0.00750651	8.87022	-0.000631553
8.74784	0.0258291	9.02075	-0.00751557	8.87899	-0.000633067
8.75637	0.0279915	9.02929	-0.00752459	8.88776	-0.000635962
8.7649	0.0303732	9.03782	-0.00753358	8.89654	-0.000639697
8.77344	0.0330798	9.04635	-0.00754258	8.90531	-0.000642251
8.78197	0.0359568	9.05489	-0.00755161	8.91408	-0.000643102
8.7905	0.039055	9.06342	-0.00756066	8.92285	-0.000643953
8.79903	0.042545	9.07195	-0.0075697	8.93162	-0.000647139
8.80757	0.0461316	9.08049	-0.00757862	8.9404	-0.000652331
8.8161	0.0499413	9.08902	-0.00758721	8.94917	-0.000657025
8.82463	0.0539251	9.09755	-0.00759508	8.95794	-0.000657129
8.83317	0.0581455	9.10609	-0.00760162	8.96671	-0.000658537
8.8417	0.0630637	9.11462	-0.00760577	8.97548	-0.000659945
8.85023	0.0681653	9.12315	-0.00760578	8.98426	-0.000663781
8.85877	0.0733867	9.13169	-0.00759876	8.99303	-0.000663958
8.8673	0.0788238	9.14022	-0.00758017	9.0018	-0.000663978
8.87583	0.0843377	9.14875	-0.00754315	9.01057	-0.000665061
8.88437	0.0901238	9.15729	-0.00747807	9.01934	-0.000666143
8.8929	0.0965161	9.16582	-0.00737227	9.02812	-0.000667569
8.90143	0.103518	9.17435	-0.00721034	9.03689	-0.000667492
8.90997	0.111251	9.18289	-0.00697518	9.04566	-0.00066406
8.9185	0.118913	9.19142	-0.0066497	9.05443	-0.000663121
8.92703	0.126581	9.19995	-0.00621914	9.0632	-0.000663026
8.93557	0.13529	9.20849	-0.00567352	9.07198	-0.000662931
8.9441	0.144864	9.21702	-0.00500971	9.08075	-0.000661435
8.95263	0.153927	9.22555	-0.00423259	9.08952	-0.000660125
8.96117	0.163791	9.23408	-0.00335499	9.09829	-0.000659972
8.9697	0.175151	9.24262	-0.00239637	9.10706	-0.000660269
8.97823	0.187297	9.25115	-0.00138041	9.11584	-0.000660566
8.98677	0.199058	9.25968	-0.000332269	9.12461	-0.000659042
8.9953	0.210987	9.26822	0.000724155	9.13338	-0.000655449
9.00383	0.223312	9.27675	0.0017682	9.14215	-0.000655359
9.01237	0.236225	9.28528	0.00278363	9.15092	-0.000655721
9.0209	0.249608	9.29382	0.00375892	9.1597	-0.000656084
9.02943	0.26408	9.30235	0.00468687	9.16847	-0.000654229
9.03797	0.279017	9.31088	0.00556385	9.17724	-0.000651328
9.0465	0.293636	9.31942	0.00638886	9.18601	-0.000650501
9.05503	0.307868	9.32795	0.00716266	9.19478	-0.000648377
9.06357	0.323	9.33648	0.00788709	9.20356	-0.000645828
9.0721	0.338516	9.34502	0.00856456	9.21233	-0.00064501
9.08063	0.354475	9.35355	0.00919773	9.2211	-0.000641056
9.08917	0.372096	9.36208	0.00978929	9.22987	-0.000635594
9.0977	0.389747	9.37062	0.0103419	9.23864	-0.000633384
9.10623	0.406891	9.37915	0.0108581	9.24742	-0.000630857
9.11477	0.424074	9.38768	0.0113403	9.25619	-0.000624825
9.1233	0.442611	9.39622	0.0117908	9.26496	-0.000619211
9.13183	0.461189	9.40475	0.0122116	9.27373	-0.00061722
9.14037	0.479268	9.41328	0.0126048	9.2825	-0.000616671
9.1489	0.497524	9.42182	0.0129722	9.29128	-0.000617165
9.15743	0.51673	9.43035	0.0133153	9.30005	-0.000614567
9.16597	0.536356	9.43888	0.0136358	9.30882	-0.000604371
9.1745	0.556153	9.44742	0.0139349	9.31759	-0.000598325
9.18303	0.575659	9.45595	0.0142141	9.32636	-0.000597352
9.19157	0.594349	9.46448	0.0144744	9.33514	-0.000593729
9.2001	0.613855	9.47302	0.0147172	9.34391	-0.000587813
9.20863	0.632922	9.48155	0.0149435	9.35268	-0.000579251
9.21717	0.652807	9.49008	0.0151544	9.36145	-0.000574887
9.2257	0.672576	9.49862	0.0153508	9.37022	-0.000573431
9.23423	0.692158	9.50715	0.0155338	9.379	-0.000570166
9.24277	0.711153	9.51568	0.0157042	9.38777	-0.00056555
9.2513	0.729658	9.52422	0.015863	9.39654	-0.00055837
9.25983	0.748142	9.53275	0.0160109	9.40531	-0.000553145
9.26837	0.766132	9.54128	0.0161488	9.41408	-0.000552026
9.2769	0.783214	9.54982	0.0162775	9.42286	-0.000549569
9.28543	0.800232	9.55835	0.0163975	9.43163	-0.000542801
9.29397	0.816382	9.56688	0.0165094	9.4404	-0.000536794
9.3025	0.831318	9.57542	0.0166139	9.44917	-0.000533351
9.31103	0.845961	9.58395	0.0167113	9.45794	-0.000529715
9.31957	0.861258	9.59248	0.0168021	9.46672	-0.000527556
9.3281	0.875323	9.60102	0.0168865	9.47549	-0.000523884
9.33663	0.887947	9.60955	0.0169649	9.48426	-0.000517311
9.34517	0.899641	9.61808	0.0170374	9.49303	-0.000512407
9.3537	0.911154	9.62662	0.0171045	9.5018	-0.000509648
9.36223	0.921819	9.63515	0.0171662	9.51058	-0.000504786
9.37077	0.931585	9.64368	0.0172231	9.51935	-0.000498252
9.3793	0.940499	9.65222	0.0172755	9.52812	-0.00049246
9.38783	0.948975	9.66075	0.0173238	9.53689	-0.000486099
9.39637	0.95682	9.66928	0.0173684	9.54566	-0.000481416
9.4049	0.963896	9.67782	0.0174098	9.55444	-0.000477868
9.41343	0.97024	9.68635	0.0174484	9.56321	-0.000470609
9.42196	0.975871	9.69488	0.0174845	9.57198	-0.000462881
9.4305	0.980855	9.70342	0.0175184	9.58075	-0.000455132
9.43903	0.985327	9.71195	0.0175503	9.58952	-0.000446801
9.44756	0.989326	9.72048	0.0175801	9.5983	-0.00044039
9.4561	0.992896	9.72902	0.0176081	9.60707	-0.000431434
9.46463	0.995766	9.73755	0.0176342	9.61584	-0.000422368
9.47316	0.997844	9.74608	0.0176585	9.62461	-0.000416546
9.4817	0.99899	9.75462	0.0176809	9.63338	-0.000411286
9.49023	0.999609	9.76315	0.0177016	9.64216	-0.000405317
9.49876	1	9.77168	0.0177207	9.65093	-0.000395732
9.5073	0.999798	9.78022	0.0177381	9.6597	-0.000385659
9.51583	0.999111	9.78875	0.0177542	9.66847	-0.000374958
9.52436	0.997854	9.79728	0.017769	9.67724	-0.000363223
9.5329	0.996205	9.80582	0.0177826	9.68602	-0.00035354
9.54143	0.994249	9.81435	0.0177951	9.69479	-0.000345374
9.54996	0.991529	9.82288	0.0178067	9.70356	-0.000337215
9.5585	0.988321	9.83142	0.0178174	9.71233	-0.0003268
9.56703	0.984754	9.83995	0.0178273	9.7211	-0.000316539
9.57556	0.981015	9.84848	0.0178364	9.72988	-0.000307478
9.5841	0.976616	9.85702	0.0178447	9.73865	-0.000299323
9.59263	0.972016	9.86555	0.0178522	9.74742	-0.000289595
9.60116	0.967688	9.87408	0.0178589	9.75619	-0.000277122
9.6097	0.962804	9.88261	0.0178648	9.76496	-0.000265367
9.61823	0.957471	9.89115	0.0178697	9.77374	-0.00025623
9.62676	0.951859	9.89968	0.0178736	9.78251	-0.000245983
9.6353	0.946295	9.90821	0.0178763	9.79128	-0.000232199
9.64383	0.940401	9.91675	0.0178776	9.80005	-0.000218927
9.65236	0.934055	9.92528	0.0178774	9.80882	-0.000210399
9.6609	0.927672	9.93381	0.0178756	9.8176	-0.00020384
9.66943	0.921354	9.94235	0.0178721	9.82637	-0.000195084
9.67796	0.914532	9.95088	0.017867	9.83514	-0.00018342
9.6865	0.907194	9.95941	0.0178603	9.84391	-0.000171074
9.69503	0.900044	9.96795	0.0178523	9.85268	-0.000160249
9.70356	0.892795	9.97648	0.0178431	9.86146	-0.000145677
9.7121	0.885638	9.98501	0.017833	9.87023	-0.000130437
9.72063	0.878451	9.99355	0.0178222	9.879	-0.000120308
9.72916	0.871301	10.0021	0.017811	9.88777	-0.000109992
9.7377	0.864128	10.0106	0.0177996	9.89654	-9.86721e-05
9.74623	0.856448	10.0191	0.0177881	9.90532	-8.91255e-05
9.75476	0.848522	10.0277	0.0177766	9.91409	-7.74182e-05
9.7633	0.840555	10.0362	0.0177654	9.92286	-6.25527e-05
9.77183	0.832592	10.0447	0.0177544	9.93163	-4.7885e-05
9.78036	0.82442	10.0533	0.0177437	9.9404	-3.42537e-05
9.7889	0.815974	10.0618	0.0177334	9.94918	-1.87596e-05
9.79743	0.807619	10.0703	0.0177236	9.95795	-2.19879e-06
9.80596	0.799341	10.0789	0.0177144	9.96672	1.28593e-05
9.8145	0.79119	10.0874	0.0177057	9.97549	3.08791e-05
9.82303	0.783102	10.0959	0.0176976	9.98426	4.74416e-05
9.83156	0.774877	10.1045	0.01769	9.99304	6.2378e-05
9.8401	0.766685	10.113	0.0176828	10.0018	7.9821e-05
9.84863	0.758615	10.1215	0.0176761	10.0106	0.000100337
9.85716	0.750614	10.1301	0.0176697	10.0194	0.000121745
9.8657	0.742346	10.1386	0.0176636	10.0281	0.000141274
9.87423	0.734285	10.1471	0.0176577	10.0369	0.000162371
9.88276	0.726068	10.1557	0.0176519	10.0457	0.0001869
9.8913	0.717751	10.1642	0.0176462	10.0544	0.000210085
9.89983	0.709604	10.1727	0.0176405	10.0632	0.000232889
9.90836	0.701834	10.1813	0.0176346	10.072	0.000255702
9.9169	0.694078	10.1898	0.0176288	10.0808	0.000276371
9.92543	0.686234	10.1983	0.0176227	10.0895	0.000298998
9.93396	0.67853	10.2069	0.0176165	10.0983	0.000323459
9.9425	0.670898	10.2154	0.0176102	10.1071	0.000346725
9.95103	0.663338	10.2239	0.0176039	10.1158	0.0003683
9.95956	0.655806	10.2325	0.017598	10.1246	0.000392008
9.9681	0.648343	10.241	0.0175926	10.1334	0.000418051
9.97663	0.640871	10.2495	0.0175876	10.1422	0.000441773
9.98516	0.633772	10.2581	0.0175831	10.1509	0.000463096
9.9937	0.626732	10.2666	0.017579	10.1597	0.000484843
10.0022	0.619582	10.2751	0.0175752	10.1685	0.000502377
10.0108	0.61267	10.2837	0.0175715	10.1772	0.000520516
10.0193	0.605928	10.2922	0.0175676	10.186	0.000540423
10.0278	0.599394	10.3007	0.0175635	10.1948	0.000557116
10.0364	0.592844	10.3093	0.0175589	10.2036	0.000571799
10.0449	0.586485	10.3178	0.0175537	10.2123	0.00058459
10.0534	0.580223	10.3263	0.0175478	10.2211	0.000596696
10.062	0.574064	10.3349	0.0175411	10.2299	0.000609624
10.0705	0.567928	10.3434	0.0175336	10.2387	0.000620393
10.079	0.56209	10.3519	0.0175252	10.2474	0.000624538
10.0876	0.555928	10.3605	0.017516	10.2562	0.000628684
10.0961	0.549649	10.369	0.0175059	10.265	0.000632279
10.1046	0.543269	10.3775	0.0174952	10.2737	0.00063289
10.1132	0.536903	10.3861	0.0174838	10.2825	0.000631838
10.1217	0.530541	10.3946	0.0174717	10.2913	0.000630786
10.1302	0.52408	10.4031	0.0174588	10.3001	0.000628383
10.1388	0.517525	10.4117	0.0174448	10.3088	0.000624346
10.1473	0.510773	10.4202	0.017429	10.3176	0.000615682
10.1558	0.504175	10.4287	0.0174101	10.3264	0.000603402
10.1644	0.497416	10.4373	0.0173861	10.3351	0.000590122
10.1729	0.490385	10.4458	0.0173539	10.3439	0.000575753
10.1814	0.483029	10.4543	0.0173095	10.3527	0.000561956
10.19	0.475544	10.4629	0.0172481	10.3615	0.000546506
10.1985	0.46811	10.4714	0.017164	10.3702	0.000529126
10.207	0.460289	10.4799	0.0170515	10.379	0.00051282
10.2156	0.452497	10.4885	0.0169053	10.3878	0.000491154
10.2241	0.444742	10.497	0.016721	10.3965	0.000467578
10.2326	0.43673	10.5055	0.0164954	10.4053	0.00044451
10.2412	0.428744	10.5141	0.0162266	10.4141	0.000420088
10.2497	0.420603	10.5226	0.015914	10.4229	0.000395622
10.2582	0.412332	10.5311	0.0155578	10.4316	0.000368422
10.2668	0.404047	10.5397	0.0151587	10.4404	0.000343979
10.2753	0.395693	10.5482	0.0147181	10.4492	0.000321167
10.2838	0.387266	10.5567	0.0142376	10.458	0.000298617
10.2924	0.378842	10.5653	0.0137196	10.4667	0.00027691
10.3009	0.370273	10.5738	0.0131664	10.4755	0.000255396
10.3094	0.361694	10.5823	0.0125808	10.4843	0.00023558
10.318	0.353168	10.5909	0.011965	10.493	0.000212976
10.3265	0.344918	10.5994	0.0113208	10.5018	0.000187235
10.335	0.336581	10.6079	0.0106497	10.5106	0.000166206
10.3436	0.328065	10.6165	0.00995374	10.5194	0.000147166
10.3521	0.319654	10.625	0.00923657	10.5281	0.000130146
10.3606	0.311448	10.6335	0.00850442	10.5369	0.000117297
10.3692	0.3035	10.6421	0.00776674	10.5457	0.000103954
10.3777	0.295572	10.6506	0.00703576	10.5544	8.76303e-05
10.3862	0.287717	10.6591	0.00632528	10.5632	7.20883e-05
10.3948	0.280064	10.6677	0.00564857	10.572	6.00627e-05
10.4033	0.272514	10.6762	0.00501628	10.5808	4.63083e-05
10.4118	0.264993	10.6847	0.00443475	10.5895	3.02268e-05
10.4204	0.257674	10.6933	0.00390519	10.5983	1.71463e-05
10.4289	0.250323	10.7018	0.00342398	10.6071	5.01235e-06
10.4374	0.243397	10.7103	0.00298389	10.6158	-4.81033e-06
10.446	0.236697	10.7189	0.00257582	10.6246	-1.13758e-05
10.4545	0.230139	10.7274	0.0021906	10.6334	-2.04962e-05
10.463	0.223821	10.7359	0.00182025	10.6422	-2.92707e-05
10.4716	0.217581	10.7445	0.00145871	10.6509	-3.67806e-05
10.4801	0.211271	10.753	0.00110177	10.6597	-4.33864e-05
10.4886	0.205041	10.7615	0.00074665	10.6685	-5.07263e-05
10.4972	0.19911	10.7701	0.000391417	10.6773	-6.05119e-05
10.5057	0.19352	10.7786	3.46073e-05	10.686	-6.68966e-05
10.5142	0.188191	10.7871	-0.00032475	10.6948	-7.10002e-05
10.5228	0.183074	10.7957	-0.000686733	10.7036	-7.4672e-05
10.5313	0.178027	10.8042	-0.00104972	10.7123	-7.71818e-05
10.5398	0.173121	10.8127	-0.00140941	10.7211	-7.74273e-05
10.5484	0.168535	10.8213	-0.00175806	10.7299	-7.78751e-05
10.5569	0.164163	10.8298	-0.00208396	10.7387	-7.8426e-05
10.5654	0.159858	10.8383	-0.0023716	10.7474	-7.6045e-05
10.574	0.155651	10.8469	-0.00260241	10.7562	-7.4715e-05
10.5825	0.151447	10.8554	-0.00275621	10.765	-7.25369e-05
10.591	0.147348	10.8639	-0.00281326	10.7737	-6.85001e-05
10.5996	0.143422	10.8725	-0.00275685	10.7825	-6.653e-05
10.6081	0.139675	10.881	-0.0025759	10.7913	-6.02095e-05
10.6166	0.136188	10.8895	-0.00226728	10.8001	-5.00869e-05
10.6252	0.132801	10.8981	-0.00183734	10.8088	-4.15703e-05
10.6337	0.129474	10.9066	-0.00130233	10.8176	-3.33348e-05
10.6422	0.126325	10.9151	-0.000687302	10.8264	-2.35916e-05
10.6508	0.123388	10.9237	-2.38856e-05	10.8351	-1.17466e-05
10.6593	0.120569	10.9322	0.000653041	10.8439	-3.9639e-06
10.6678	0.117867	10.9407	0.00130906	10.8527	2.50743e-06
10.6764	0.115251	10.9493	0.00191387	10.8615	1.03437e-05
10.6849	0.112759	10.9578	0.00244439	10.8702	1.87947e-05
10.6934	0.110178	10.9663	0.0028867	10.879	2.91526e-05
10.702	0.107588	10.9749	0.00323663	10.8878	3.86793e-05
10.7105	0.105211	10.9834	0.00349871	10.8966	5.04967e-05
10.719	0.102984	10.9919	0.00368375	10.9053	6.47898e-05
10.7276	0.100878	11.0005	0.00380554	10.9141	7.50609e-05
10.7361	0.0988074	11.009	0.00387716	10.9229	8.49722e-05
10.7446	0.0968744	11.0175	0.00390785	10.9316	9.49164e-05
10.7532	0.0950655	11.0261	0.00390121	10.9404	0.000104887
10.7617	0.0933643	11.0346	0.00385503	10.9492	0.000115344
10.7702	0.0916796	11.0431	0.00376253	10.958	0.000125975
10.7788	0.090046	11.0517	0.00361476	10.9667	0.000138313
10.7873	0.0884857	11.0602	0.00340344	10.9755	0.000151428
10.7958	0.0869946	11.0687	0.00312366	10.9843	0.000165142
10.8044	0.0855519	11.0773	0.00277569	10.993	0.000180751
10.8129	0.0841875	11.0858	0.00236568	11.0018	0.000195025
10.8214	0.0828209	11.0943	0.00190509	11.0106	0.000210437
10.83	0.0815611	11.1029	0.00140925	11.0194	0.000225809
10.8385	0.0802894	11.1114	0.000895012	11.0281	0.000236244
10.847	0.0790467	11.1199	0.000378522	11.0369	0.000249162
10.8556	0.0779255	11.1285	-0.000126867	11.0457	0.00026476
10.8641	0.0769248	11.137	-0.000611899	11.0544	0.000277693
10.8726	0.0760313	11.1455	-0.00107189	11.0632	0.000289341
10.8812	0.0752331	11.1541	-0.00150629	11.072	0.000302107
10.8897	0.0745096	11.1626	-0.00191767	11.0808	0.000313796
10.8982	0.0738512	11.1711	-0.0023102	11.0895	0.000326477
10.9068	0.0732419	11.1797	-0.00268822	11.0983	0.000338051
10.9153	0.0724638	11.1882	-0.00305509	11.1071	0.000347457
10.9238	0.0716377	11.1967	-0.00341254	11.1159	0.000356297
10.9324	0.0708783	11.2053	-0.00376071	11.1246	0.000365218
10.9409	0.0701794	11.2138	-0.00409847	11.1334	0.000373726
10.9494	0.0695483	11.2223	-0.00442412	11.1422	0.000382912
10.958	0.0689805	11.2309	-0.00473598	11.1509	0.000392289
10.9665	0.0684617	11.2394	-0.0050329	11.1597	0.000399418
10.975	0.06798	11.2479	-0.00531446	11.1685	0.00040642
10.9836	0.0675306	11.2565	-0.00558092	11.1773	0.000412622
10.9921	0.0670087	11.265	-0.00583309	11.186	0.000419822
11.0006	0.0665194	11.2735	-0.00607199	11.1948	0.00042498
11.0092	0.0660696	11.2821	-0.00629863	11.2036	0.00042657
11.0177	0.0655898	11.2906	-0.00651385	11.2123	0.000427871
11.0262	0.0651427	11.2991	-0.00671831	11.2211	0.000429857
11.0348	0.0647372	11.3077	-0.00691247	11.2299	0.000433581
11.0433	0.064331	11.3162	-0.00709671	11.2387	0.000438285
11.0518	0.0638562	11.3247	-0.00727141	11.2474	0.000441193
11.0604	0.0633808	11.3333	-0.00743698	11.2562	0.000441972
11.0689	0.0629405	11.3418	-0.00759388	11.265	0.000443338
11.0774	0.0625373	11.3503	-0.0077426	11.2737	0.000447724
11.086	0.062104	11.3589	-0.0078836	11.2825	0.000447993
11.0945	0.0616496	11.3674	-0.0080173	11.2913	0.000447207
11.103	0.0612418	11.3759	-0.00814401	11.3001	0.000446421
11.1116	0.0608567	11.3845	-0.00826395	11.3088	0.000444695
11.1201	0.0604865	11.393	-0.00837727	11.3176	0.000444389
11.1286	0.0599987	11.4015	-0.00848411	11.3264	0.000443488
11.1372	0.0594983	11.4101	-0.0085846	11.3352	0.000442588
11.1457	0.0590432	11.4186	-0.00867893	11.3439	0.000440414
11.1542	0.058635	11.4271	-0.00876735	11.3527	0.000439504
11.1628	0.0581797	11.4357	-0.0088502	11.3615	0.000438595
11.1713	0.0576977	11.4442	-0.00892786	11.3702	0.000435419
11.1798	0.0572327	11.4527	-0.00900076	11.379	0.00042907
11.1884	0.056789	11.4613	-0.00906932	11.3878	0.000424995
11.1969	0.056339	11.4698	-0.00913394	11.3966	0.000422382
11.2054	0.0558172	11.4783	-0.00919499	11.4053	0.000419457
11.214	0.0553305	11.4869	-0.00925279	11.4141	0.000418285
11.2225	0.0548947	11.4954	-0.00930755	11.4229	0.000417113
11.231	0.0543591	11.5039	-0.00935935	11.4316	0.000412268
11.2396	0.0537579	11.5125	-0.00940871	11.4404	0.000410471
11.2481	0.0531818	11.521	-0.00945572	11.4492	0.000407593
11.2566	0.0526477	11.5295	-0.0095005	11.458	0.000404714
11.2652	0.0521524	11.5381	-0.00954305	11.4667	0.000400029
11.2737	0.0516228	11.5466	-0.00958344	11.4755	0.000395403
11.2822	0.0510671	11.5551	-0.00962161	11.4843	0.00039363
11.2908	0.050439	11.5637	-0.00965755	11.493	0.000393586
11.2993	0.0498147	11.5722	-0.00969168	11.5018	0.000393006
11.3078	0.0492194	11.5807	-0.00972401	11.5106	0.000392289
11.3164	0.0486752	11.5893	-0.00975472	11.5194	0.000391573
11.3249	0.0481417	11.5978	-0.00978414	11.5281	0.000391105
11.3334	0.0476108	11.6063	-0.00981231	11.5369	0.000390074
11.342	0.0469363	11.6149	-0.00983943	11.5457	0.000389043
11.3505	0.0462356	11.6234	-0.00986553	11.5545	0.000385936
11.359	0.0455643	11.6319	-0.00989064	11.5632	0.000382537
11.3676	0.0448945	11.6405	-0.00991499	11.572	0.000380637
11.3761	0.0442364	11.649	-0.00993845	11.5808	0.000379797
11.3846	0.0435688	11.6575	-0.00996084	11.5895	0.000378957
11.3932	0.042915	11.6661	-0.00998188	11.5983	0.000376413
11.4017	0.0422308	11.6746	-0.0100015	11.6071	0.000374387
11.4102	0.0415874	11.6831	-0.0100189	11.6159	0.000373538
11.4188	0.0409987	11.6917	-0.0100337	11.6246	0.000372688
11.4273	0.0404597	11.7002	-0.010045	11.6334	0.00037152
11.4358	0.03994	11.7087	-0.010052	11.6422	0.000368939
11.4444	0.0394076	11.7173	-0.010054	11.6509	0.000367863
11.4529	0.0388335	11.7258	-0.0100503	11.6597	0.000367588
11.4614	0.038198	11.7343	-0.0100405	11.6685	0.000367706
11.47	0.0375758	11.7429	-0.0100249	11.6773	0.000367188
11.4785	0.036999	11.7514	-0.0100041	11.686	0.000366401
11.487	0.0364665	11.7599	-0.00997956	11.6948	0.000365614
11.4956	0.0359307	11.7685	-0.00995372	11.7036	0.000366351
11.5041	0.0353966	11.777	-0.00992888	11.7123	0.000366165
11.5126	0.0349087	11.7855	-0.00990732	11.7211	0.000363433
11.5212	0.0344694	11.7941	-0.00989103	11.7299	0.000360701
11.5297	0.0340508	11.8026	-0.00988119	11.7387	0.000355471
11.5382	0.033603	11.8111	-0.00987827	11.7474	0.000352378
11.5468	0.0331112	11.8197	-0.00988179	11.7562	0.000351713
11.5553	0.0325915	11.8282	-0.00989057	11.765	0.000350585
11.5638	0.0321006	11.8367	-0.009903	11.7738	0.000349457
11.5724	0.0316722	11.8453	-0.00991717	11.7825	0.000348241
11.5809	0.0312554	11.8538	-0.00993096	11.7913	0.000346891
11.5894	0.0308402	11.8623	-0.00994194	11.8001	0.000345541
11.598	0.0303698	11.8709	-0.0099471	11.8088	0.000343362
11.6065	0.0298817	11.8794	-0.00994236	11.8176	0.000338259
11.615	0.0293848	11.8879	-0.00992172	11.8264	0.000333785
11.6236	0.0288946	11.8965	-0.00987664	11.8352	0.000332303
11.6321	0.0284536	11.905	-0.00979593	11.8439	0.00033378
11.6406	0.0280433	11.9135	-0.00966587	11.8527	0.000333541
11.6492	0.0276568	11.9221	-0.00947087	11.8615	0.000333303
11.6577	0.027313	11.9306	-0.00919488	11.8702	0.000335542
11.6662	0.0269953	11.9391	-0.00882323	11.879	0.000335832
11.6748	0.0266983	11.9477	-0.00834478	11.8878	0.000336082
11.6833	0.0263991	11.9562	-0.00775397	11.8966	0.000335028
11.6918	0.0260129	11.9647	-0.00705203	11.9053	0.000333973
11.7004	0.0256736	11.9733	-0.0062472	11.9141	0.000329877
11.7089	0.0253711	11.9818	-0.00535476	11.9229	0.000330616
11.7174	0.0250964	11.9903	-0.00439521	11.9316	0.000335616
11.726	0.0248413	11.9989	-0.00339075	11.9404	0.00033809
11.7345	0.0245279	12.0074	-0.00236422	11.9492	0.000337425
11.743	0.0241642	12.0159	-0.00133673	11.958	0.00033826
11.7516	0.0238223	12.0245	-0.000326251	11.9667	0.000339449
11.7601	0.0234944	12.033	0.000653567	11.9755	0.00034093
11.7686	0.0231762	12.0415	0.00159303	11.9843	0.000340337
11.7772	0.0228372	12.0501	0.0024862	11.9931	0.000339346
11.7857	0.0225136	12.0586	0.00333013	12.0018	0.000338355
11.7942	0.0222171	12.0671	0.00412414	12.0106	0.000336408
11.8028	0.021946	12.0757	0.00486922	12.0194	0.000338535
11.8113	0.0216647	12.0842	0.00556688	12.0281	0.000337964
11.8198	0.0213986	12.0927	0.00621938	12.0369	0.000337394
11.8284	0.0211615	12.1013	0.0068292	12.0457	0.000337277
11.8369	0.0209497	12.1098	0.00739885	12.0545	0.000339779
11.8454	0.0207601	12.1183	0.00793082	12.0632	0.000338842
11.854	0.0205934	12.1269	0.0084275	12.072	0.000337904
11.8625	0.0204451	12.1354	0.00889115	12.0808	0.00033571
11.871	0.0203056	12.1439	0.00932401	12.0895	0.000334158
11.8796	0.0201728	12.1525	0.0097283	12.0983	0.000334366
11.8881	0.0200262	12.161	0.010106	12.1071	0.000335819
11.8966	0.0198289	12.1695	0.0104592	12.1159	0.000335141
11.9052	0.019667	12.1781	0.0107895	12.1246	0.000334258
11.9137	0.019538	12.1866	0.0110984	12.1334	0.000333375
11.9222	0.0194272	12.1951	0.0113874	12.1422	0.000333302
11.9308	0.0193151	12.2037	0.0116577	12.1509	0.000334497
11.9393	0.0191991	12.2122	0.0119104	12.1597	0.00033442
11.9478	0.019099	12.2207	0.0121467	12.1685	0.000333928
11.9564	0.0189947	12.2293	0.0123673	12.1773	0.000333436
11.9649	0.018883	12.2378	0.0125732	12.186	0.000333133
11.9734	0.0187705	12.2463	0.0127655	12.1948	0.000336087
11.982	0.0186343	12.2549	0.0129448	12.2036	0.000339514
11.9905	0.018519	12.2634	0.0131123	12.2124	0.000341407
11.999	0.0184187	12.2719	0.0132686	12.2211	0.000343595
12.0076	0.0183477	12.2805	0.0134146	12.2299	0.00034849
12.0161	0.0183291	12.289	0.013551	12.2387	0.000354413
12.0246	0.0183322	12.2975	0.0136785	12.2474	0.000354981
12.0332	0.018331	12.3061	0.0137977	12.2562	0.00035505
12.0417	0.0183229	12.3146	0.0139092	12.265	0.000359232
12.0502	0.0182782	12.3231	0.0140133	12.2738	0.0003636
12.0588	0.0181974	12.3317	0.0141106	12.2825	0.000368071
12.0673	0.0181527	12.3402	0.0142014	12.2913	0.000375474
12.0758	0.0181237	12.3487	0.0142861	12.3001	0.000382658
12.0844	0.0180793	12.3573	0.0143649	12.3088	0.000386258
12.0929	0.0180168	12.3658	0.0144381	12.3176	0.000393342
12.1014	0.0180073	12.3743	0.0145061	12.3264	0.000403139
12.11	0.0180127	12.3829	0.014569	12.3352	0.000408681
12.1185	0.0180207	12.3914	0.0146271	12.3439	0.000411904
12.127	0.0180304	12.3999	0.0146807	12.3527	0.000416033
12.1356	0.0180737	12.4085	0.0147299	12.3615	0.00042114
12.1441	0.0181223	12.417	0.0147751	12.3702	0.000427721
12.1526	0.0181981	12.4255	0.0148164	12.379	0.000431032
12.1612	0.0182837	12.4341	0.0148542	12.3878	0.000434779
12.1697	0.0183747	12.4426	0.0148887	12.3966	0.000439493
12.1782	0.0184897	12.4511	0.0149202	12.4053	0.000441342
12.1868	0.0185905	12.4597	0.0149488	12.4141	0.000448539
12.1953	0.0186716	12.4682	0.0149748	12.4229	0.000452699
12.2038	0.0187269	12.4767	0.0149983	12.4317	0.000451993
12.2124	0.0187574	12.4853	0.0150195	12.4404	0.000451474
12.2209	0.0188433	12.4938	0.0150386	12.4492	0.000452695
12.2294	0.0189327	12.5023	0.0150557	12.458	0.000458285
12.238	0.0190093	12.5109	0.015071	12.4667	0.000461308
12.2465	0.0190735	12.5194	0.0150846	12.4755	0.000461599
12.255	0.0191206	12.5279	0.0150968	12.4843	0.00046191
12.2636	0.019168	12.5365	0.0151077	12.4931	0.000465296
12.2721	0.0192334	12.545	0.0151174	12.5018	0.000471083
12.2806	0.0193043	12.5535	0.0151262	12.5106	0.000475969
12.2891	0.019372	12.5621	0.015134	12.5194	0.000476922
12.2977	0.0194329	12.5706	0.0151411	12.5281	0.000477001
12.3062	0.0194872	12.5791	0.0151475	12.5369	0.000477079
12.3147	0.019534	12.5877	0.0151534	12.5457	0.0004845
12.3233	0.0196016	12.5962	0.0151586	12.5545	0.000493045
12.3318	0.0196757	12.6047	0.0151634	12.5632	0.000497251
12.3403	0.0197412	12.6133	0.0151677	12.572	0.000501566
12.3489	0.0197973	12.6218	0.0151716	12.5808	0.000508974
12.3574	0.0198715	12.6303	0.015175	12.5895	0.000516744
12.3659	0.0199684	12.6389	0.0151781	12.5983	0.000522591
12.3745	0.0200693	12.6474	0.0151808	12.6071	0.000527134
12.383	0.0201616	12.6559	0.015183	12.6159	0.000530034
12.3915	0.0202372	12.6645	0.0151847	12.6246	0.000533833
12.4001	0.0202965	12.673	0.0151857	12.6334	0.000540332
12.4086	0.0202661	12.6815	0.0151861	12.6422	0.000547361
12.4171	0.0202413	12.6901	0.0151857	12.651	0.000553927
12.4257	0.0202412	12.6986	0.0151845	12.6597	0.000557578
12.4342	0.0202634	12.7071	0.0151823	12.6685	0.000561904
12.4427	0.0203078	12.7157	0.0151793	12.6773	0.000570278
12.4513	0.0203514	12.7242	0.0151753	12.686	0.000575313
12.4598	0.020382	12.7327	0.0151704	12.6948	0.00057702
12.4683	0.0203995	12.7413	0.0151646	12.7036	0.000579337
12.4769	0.0204163	12.7498	0.015158	12.7124	0.000583631
12.4854	0.0204295	12.7583	0.0151507	12.7211	0.000591255
12.4939	0.0204386	12.7669	0.0151427	12.7299	0.000596758
12.5025	0.0204471	12.7754	0.0151342	12.7387	0.00059888
12.511	0.0204496	12.7839	0.0151255	12.7474	0.0006023
12.5195	0.0204456	12.7925	0.0151167	12.7562	0.000606582
12.5281	0.0204327	12.801	0.0151078	12.765	0.000609504
12.5366	0.0204837	12.8095	0.0150992	12.7738	0.000610306
12.5451	0.020545	12.8181	0.0150908	12.7825	0.000610337
12.5537	0.0206054	12.8266	0.0150827	12.7913	0.000610368
12.5622	0.0206732	12.8351	0.015075	12.8001	0.000610999
12.5707	0.0207766	12.8437	0.0150677	12.8088	0.000615106
12.5793	0.0208881	12.8522	0.0150609	12.8176	0.000618402
12.5878	0.0209601	12.8607	0.0150545	12.8264	0.000620003
12.5963	0.0209896	12.8693	0.0150485	12.8352	0.000621657
12.6049	0.020984	12.8778	0.015043	12.8439	0.000623414
12.6134	0.0209698	12.8863	0.0150378	12.8527	0.000625769
12.6219	0.0209518	12.8949	0.0150331	12.8615	0.000627872
12.6305	0.0208847	12.9034	0.0150285	12.8703	0.000632438
12.639	0.0208148	12.9119	0.015024	12.879	0.000635068
12.6475	0.0207509	12.9205	0.0150193	12.8878	0.000636124
12.6561	0.0206883	12.929	0.0150145	12.8966	0.000641745
12.6646	0.0206344	12.9375	0.0150092	12.9053	0.000648788
12.6731	0.0205871	12.9461	0.0150031	12.9141	0.000653865
12.6817	0.0205452	12.9546	0.0149964	12.9229	0.000658432
12.6902	0.0204992	12.9631	0.0149892	12.9317	0.000663874
12.6987	0.0204481	12.9717	0.0149814	12.9404	0.000671024
12.7073	0.0203692	12.9802	0.014973	12.9492	0.000676119
12.7158	0.0202593	12.9887	0.0149644	12.958	0.000679606
12.7243	0.0201736	12.9973	0.0149553	12.9667	0.000684144
12.7329	0.0201051	13.0058	0.0149459	12.9755	0.000688405
12.7414	0.0200754	13.0143	0.0149361	12.9843	0.000695428
12.7499	0.0200749	13.0229	0.014926	12.9931	0.000702801
12.7585	0.0200866	13.0314	0.0149154	13.0018	0.000706736
12.767	0.0200909	13.0399	0.0149044	13.0106	0.000709587
12.7755	0.0200856	13.0485	0.014893	13.0194	0.000714778
12.7841	0.0200556	13.057	0.0148813	13.0281	0.000721451
12.7926	0.0200135	13.0655	0.0148696	13.0369	0.000727147
12.8011	0.0199726	13.0741	0.0148579	13.0457	0.000729181
12.8097	0.0199124	13.0826	0.0148466	13.0545	0.000730577
12.8182	0.0198592	13.0911	0.0148358	13.0632	0.000734707
12.8267	0.0198316	13.0997	0.0148256	13.072	0.000741426
12.8353	0.0198261	13.1082	0.0148164	13.0808	0.000751051
12.8438	0.0198125	13.1167	0.014808	13.0896	0.000758511
12.8523	0.019787	13.1253	0.0148006	13.0983	0.000765675
12.8609	0.0197387	13.1338	0.0147939	13.1071	0.0007734
12.8694	0.0196736	13.1423	0.0147877	13.1159	0.00078181
12.8779	0.0196172	13.1509	0.0147819	13.1246	0.000788414
12.8865	0.0196065	13.1594	0.014776	13.1334	0.000792728
12.895	0.0196108	13.1679	0.01477	13.1422	0.000797131
12.9035	0.019611	13.1765	0.0147634	13.151	0.000801994
12.9121	0.0196053	13.185	0.0147563	13.1597	0.000810447
12.9206	0.0195647	13.1935	0.0147484	13.1685	0.000818822
12.9291	0.019524	13.2021	0.0147397	13.1773	0.000823389
12.9377	0.0194897	13.2106	0.0147302	13.186	0.000825414
12.9462	0.0194567	13.2191	0.01472	13.1948	0.000830607
12.9547	0.0194242	13.2277	0.0147092	13.2036	0.000835703
12.9633	0.0193832	13.2362	0.0146978	13.2124	0.000838729
12.9718	0.0193432	13.2447	0.0146858	13.2211	0.000844149
12.9803	0.0193126	13.2533	0.0146734	13.2299	0.000847356
12.9889	0.0193283	13.2618	0.0146605	13.2387	0.000849296
12.9974	0.0193553	13.2703	0.0146473	13.2474	0.000856297
13.0059	0.0193781	13.2789	0.0146337	13.2562	0.000862922
13.0145	0.0193958	13.2874	0.0146201	13.265	0.000867258
13.023	0.0193744	13.2959	0.0146064	13.2738	0.000871118
13.0315	0.0193757	13.3045	0.014593	13.2825	0.000875026
13.0401	0.0194099	13.313	0.0145799	13.2913	0.000882452
13.0486	0.0194452	13.3215	0.0145675	13.3001	0.000887706
13.0571	0.0194764	13.3301	0.0145557	13.3089	0.000889668
13.0657	0.0194981	13.3386	0.0145448	13.3176	0.000891922
13.0742	0.0195307	13.3471	0.0145347	13.3264	0.000893047
13.0827	0.0195686	13.3557	0.0145255	13.3352	0.000898457
13.0913	0.0196149	13.3642	0.014517	13.3439	0.000905539
13.0998	0.0196598	13.3727	0.0145092	13.3527	0.000908553
13.1083	0.019702	13.3813	0.014502	13.3615	0.000912407
13.1169	0.0197367	13.3898	0.0144952	13.3703	0.000918485
13.1254	0.0197639	13.3983	0.0144887	13.379	0.00092443
13.1339	0.0197778	13.4069	0.0144824	13.3878	0.000927552
13.1425	0.0198155	13.4154	0.0144762	13.3966	0.000930597
13.151	0.0198808	13.4239	0.01447	13.4053	0.000934457
13.1595	0.0199379	13.4325	0.0144638	13.4141	0.00093839
13.1681	0.019982	13.441	0.0144575	13.4229	0.000941923
13.1766	0.0200025	13.4495	0.014451	13.4317	0.000945701
13.1851	0.0199691	13.4581	0.0144442	13.4404	0.000951534
13.1937	0.0199327	13.4666	0.0144372	13.4492	0.000956705
13.2022	0.0199011	13.4751	0.0144299	13.458	0.000962866
13.2107	0.0198726	13.4837	0.0144222	13.4667	0.000969561
13.2193	0.0198467	13.4922	0.0144142	13.4755	0.000973017
13.2278	0.0198124	13.5007	0.014406	13.4843	0.000979421
13.2363	0.0198291	13.5093	0.0143974	13.4931	0.000985761
13.2449	0.019861	13.5178	0.0143886	13.5018	0.000990005
13.2534	0.0198994	13.5263	0.0143798	13.5106	0.000997522
13.2619	0.0199632	13.5349	0.0143709	13.5194	0.00100619
13.2705	0.0200271	13.5434	0.0143621	13.5282	0.00101604
13.279	0.0200688	13.5519	0.0143534	13.5369	0.00102624
13.2875	0.0200876	13.5605	0.014345	13.5457	0.00103663
13.2961	0.0200682	13.569	0.0143369	13.5545	0.00104952
13.3046	0.020042	13.5775	0.0143291	13.5632	0.00106183
13.3131	0.0200217	13.5861	0.0143214	13.572	0.00107082
13.3217	0.0200002	13.5946	0.014314	13.5808	0.00107939
13.3302	0.0199763	13.6031	0.0143068	13.5896	0.00108751
13.3387	0.0199456	13.6117	0.0142997	13.5983	0.00110158
13.3473	0.019907	13.6202	0.0142926	13.6071	0.00111717
13.3558	0.0198864	13.6287	0.0142854	13.6159	0.00112814
13.3643	0.0198979	13.6373	0.0142781	13.6246	0.00113908
13.3729	0.0199148	13.6458	0.0142704	13.6334	0.00115401
13.3814	0.0199262	13.6543	0.0142624	13.6422	0.0011722
13.3899	0.0199316	13.6629	0.0142538	13.651	0.00118767
13.3985	0.0199258	13.6714	0.0142447	13.6597	0.00120244
13.407	0.0199018	13.6799	0.014235	13.6685	0.00121863
13.4155	0.0198678	13.6885	0.0142248	13.6773	0.00123591
13.4241	0.0198643	13.697	0.0142141	13.686	0.00125644
13.4326	0.0198801	13.7055	0.0142032	13.6948	0.00127708
13.4411	0.0199106	13.7141	0.0141921	13.7036	0.0012962
13.4497	0.0199389	13.7226	0.0141809	13.7124	0.0013159
13.4582	0.0199624	13.7311	0.0141699	13.7211	0.00133818
13.4667	0.0199721	13.7397	0.0141592	13.7299	0.00136053
13.4753	0.019969	13.7482	0.0141486	13.7387	0.00138097
13.4838	0.0199695	13.7567	0.0141384	13.7475	0.00139953
13.4923	0.0199698	13.7653	0.0141285	13.7562	0.00142063
13.5009	0.0199689	13.7738	0.0141189	13.765	0.0014444
13.5094	0.0199586	13.7823	0.0141096	13.7738	0.00146788
13.5179	0.0199225	13.7909	0.0141006	13.7825	0.00149059
13.5265	0.0199183	13.7994	0.0140919	13.7913	0.0015129
13.535	0.0199476	13.8079	0.0140835	13.8001	0.00153851
13.5435	0.0199884	13.8165	0.0140755	13.8089	0.00156339
13.5521	0.0200228	13.825	0.0140679	13.8176	0.00158832
13.5606	0.0200493	13.8335	0.0140606	13.8264	0.0016121
13.5691	0.0200531	13.8421	0.0140537	13.8352	0.00163338
13.5777	0.0200629	13.8506	0.0140471	13.8439	0.00165609
13.5862	0.0201118	13.8591	0.0140407	13.8527	0.00168162
13.5947	0.0201689	13.8677	0.0140346	13.8615	0.00170847
13.6033	0.0202277	13.8762	0.0140287	13.8703	0.00173478
13.6118	0.0203027	13.8847	0.0140232	13.879	0.00176165
13.6203	0.0203868	13.8933	0.0140187	13.8878	0.00178965
13.6289	0.0204646	13.9018	0.0140161	13.8966	0.00182006
13.6374	0.0205367	13.9103	0.0140175	13.9053	0.00185153
13.6459	0.0206015	13.9189	0.0140265	13.9141	0.00187842
13.6545	0.0206591	13.9274	0.0140486	13.9229	0.00190637
13.663	0.0207296	13.9359	0.014092	13.9317	0.00193653
13.6715	0.0208027	13.9445	0.0141676	13.9404	0.00196654
13.6801	0.0209356	13.953	0.0142895	13.9492	0.00199614
13.6886	0.0210738	13.9615	0.0144737	13.958	0.00202537
13.6971	0.0212159	13.9701	0.0147368	13.9668	0.0020544
13.7057	0.0213508	13.9786	0.0150944	13.9755	0.00208414
13.7142	0.021477	13.9871	0.0155581	13.9843	0.00211497
13.7227	0.0216107	13.9957	0.0161338	13.9931	0.00214602
13.7313	0.0217349	14.0042	0.0168201	14.0018	0.00217688
13.7398	0.021845	14.0127	0.0176077	14.0106	0.00220535
13.7483	0.0219424	14.0213	0.0184807	14.0194	0.00223335
13.7569	0.022056	14.0298	0.0194178	14.0282	0.00225942
13.7654	0.0221687	14.0383	0.0203959	14.0369	0.00228836
13.7739	0.0222794	14.0469	0.0213919	14.0457	0.00231879
13.7825	0.0223802	14.0554	0.0223848	14.0545	0.00234708
13.791	0.0224652	14.0639	0.0233579	14.0632	0.00237737
13.7995	0.0225351	14.0725	0.0242983	14.072	0.00240864
13.8081	0.0225861	14.081	0.0251976	14.0808	0.00243711
13.8166	0.0226404	14.0895	0.026051	14.0896	0.0024631
13.8251	0.0227187	14.0981	0.0268563	14.0983	0.00248952
13.8337	0.0228065	14.1066	0.0276135	14.1071	0.00251466
13.8422	0.0229001	14.1151	0.0283236	14.1159	0.00254013
13.8507	0.0230092	14.1237	0.0289887	14.1246	0.00256736
13.8593	0.023132	14.1322	0.0296109	14.1334	0.00259339
13.8678	0.0232562	14.1407	0.0301926	14.1422	0.00261634
13.8763	0.0233745	14.1493	0.0307363	14.151	0.00264012
13.8849	0.0234779	14.1578	0.0312442	14.1597	0.00266688
13.8934	0.0235664	14.1663	0.0317186	14.1685	0.0026932
13.9019	0.0236577	14.1749	0.0321615	14.1773	0.00271809
13.9105	0.0237542	14.1834	0.032575	14.1861	0.00274132
13.919	0.0238517	14.1919	0.0329609	14.1948	0.00276457
13.9275	0.0239606	14.2005	0.0333212	14.2036	0.00279003
13.9361	0.0240818	14.209	0.0336574	14.2124	0.00281738
13.9446	0.0242132	14.2175	0.0339712	14.2211	0.00284195
13.9531	0.0243508	14.2261	0.0342641	14.2299	0.00286366
13.9617	0.024485	14.2346	0.0345374	14.2387	0.00288641
13.9702	0.0246148	14.2431	0.0347924	14.2475	0.00291184
13.9787	0.0247366	14.2517	0.0350304	14.2562	0.0029375
13.9873	0.0248427	14.2602	0.0352525	14.265	0.00295998
13.9958	0.0249334	14.2687	0.0354596	14.2738	0.0029795
14.0043	0.0249992	14.2773	0.0356528	14.2825	0.00299969
14.0129	0.0250582	14.2858	0.035833	14.2913	0.00302264
14.0214	0.0250964	14.2943	0.0360009	14.3001	0.00304436
14.0299	0.0251128	14.3029	0.0361572	14.3089	0.00306362
14.0385	0.0250865	14.3114	0.0363027	14.3176	0.00308159
14.047	0.0250593	14.3199	0.036438	14.3264	0.00310099
14.0555	0.0250592	14.3285	0.0365638	14.3352	0.00312479
14.0641	0.0250726	14.337	0.0366807	14.3439	0.00314653
14.0726	0.0250873	14.3455	0.0367892	14.3527	0.00316307
14.0811	0.0251016	14.3541	0.0368902	14.3615	0.00317976
14.0897	0.025125	14.3626	0.036984	14.3703	0.00319801
14.0982	0.0251671	14.3711	0.0370714	14.379	0.00321871
14.1067	0.0252163	14.3797	0.0371528	14.3878	0.00323898
14.1153	0.0252599	14.3882	0.0372288	14.3966	0.00325688
14.1238	0.0252968	14.3967	0.0372997	14.4054	0.00327353
14.1323	0.0253258	14.4053	0.0373661	14.4141	0.00329121
14.1409	0.0253784	14.4138	0.0374281	14.4229	0.00331211
14.1494	0.0254331	14.4223	0.0374861	14.4317	0.00333157
14.1579	0.0254854	14.4309	0.0375403	14.4404	0.00334704
14.1665	0.025544	14.4394	0.0375911	14.4492	0.00336177
14.175	0.0256029	14.4479	0.0376387	14.458	0.0033765
14.1835	0.0256612	14.4565	0.0376833	14.4668	0.00339238
14.1921	0.0257457	14.465	0.0377251	14.4755	0.00341224
14.2006	0.0258367	14.4735	0.0377643	14.4843	0.00343135
14.2091	0.0259219	14.4821	0.0378012	14.4931	0.00344714
14.2177	0.0259908	14.4906	0.0378357	14.5018	0.00346275
14.2262	0.0260436	14.4991	0.0378679	14.5106	0.0034831
14.2347	0.0260773	14.5077	0.037898	14.5194	0.0035055
14.2433	0.0261249	14.5162	0.0379259	14.5282	0.00352495
14.2518	0.0261801	14.5247	0.0379516	14.5369	0.00354266
14.2603	0.0262331	14.5333	0.0379751	14.5457	0.00356114
14.2689	0.0262814	14.5418	0.0379962	14.5545	0.00358237
14.2774	0.0263245	14.5503	0.0380151	14.5632	0.0036051
14.2859	0.0263628	14.5589	0.0380316	14.572	0.00362915
14.2945	0.0264024	14.5674	0.0380458	14.5808	0.00364952
14.303	0.0264398	14.5759	0.0380579	14.5896	0.00367165
14.3115	0.0264746	14.5845	0.038068	14.5983	0.00370054
14.3201	0.0265015	14.593	0.0380765	14.6071	0.00373156
14.3286	0.0265205	14.6015	0.0380836	14.6159	0.00376065
14.3371	0.0265251	14.6101	0.0380897	14.6247	0.00378829
14.3457	0.02655	14.6186	0.0380951	14.6334	0.00381695
14.3542	0.0266086	14.6271	0.0381003	14.6422	0.00384785
14.3627	0.0266799	14.6357	0.0381054	14.651	0.00388349
14.3713	0.0267363	14.6442	0.0381107	14.6597	0.00391827
14.3798	0.0267753	14.6527	0.0381161	14.6685	0.00395104
14.3883	0.0267989	14.6613	0.0381219	14.6773	0.00398913
14.3969	0.0268085	14.6698	0.0381278	14.6861	0.00403126
14.4054	0.0268044	14.6783	0.0381338	14.6948	0.00407367
14.4139	0.0268215	14.6869	0.0381396	14.7036	0.00411808
14.4225	0.0268533	14.6954	0.0381452	14.7124	0.00416324
14.431	0.026885	14.7039	0.0381502	14.7211	0.00421092
14.4395	0.026909	14.7125	0.0381547	14.7299	0.00425996
14.4481	0.0269251	14.721	0.0381584	14.7387	0.00431218
14.4566	0.0269236	14.7295	0.0381614	14.7475	0.00437021
14.4651	0.0269397	14.7381	0.0381637	14.7562	0.00442629
14.4737	0.0269776	14.7466	0.0381654	14.765	0.00448293
14.4822	0.0270193	14.7551	0.0381666	14.7738	0.00454932
14.4907	0.0270592	14.7637	0.0381675	14.7825	0.00462003
14.4993	0.0270813	14.7722	0.0381686	14.7913	0.00469115
14.5078	0.0270845	14.7807	0.0381702	14.8001	0.00476546
14.5163	0.0270966	14.7893	0.0381733	14.8089	0.00484148
14.5249	0.0271231	14.7978	0.0381793	14.8176	0.00491764
14.5334	0.0271548	14.8063	0.0381907	14.8264	0.00499944
14.5419	0.0271865	14.8149	0.0382116	14.8352	0.00508872
14.5505	0.0272176	14.8234	0.038248	14.844	0.00518017
14.559	0.0272563	14.8319	0.038309	14.8527	0.00527575
14.5675	0.0273182	14.8405	0.0384065	14.8615	0.00537718
14.5761	0.0273831	14.849	0.0385552	14.8703	0.00548655
14.5846	0.0274457	14.8575	0.038772	14.879	0.00560081
14.5931	0.0275025	14.8661	0.0390738	14.8878	0.00571715
14.6017	0.0275514	14.8746	0.0394758	14.8966	0.00583333
14.6102	0.0275928	14.8831	0.0399885	14.9054	0.00594934
14.6187	0.0276075	14.8917	0.040616	14.9141	0.00607403
14.6273	0.0275778	14.9002	0.0413542	14.9229	0.00620261
14.6358	0.0275607	14.9087	0.0421911	14.9317	0.00633383
14.6443	0.0275522	14.9173	0.043108	14.9404	0.00647224
14.6529	0.0275492	14.9258	0.044082	14.9492	0.00661557
14.6614	0.027572	14.9343	0.0450884	14.958	0.0067661
14.6699	0.0276347	14.9429	0.0461039	14.9668	0.00692182
14.6785	0.0277051	14.9514	0.0471082	14.9755	0.00707928
14.687	0.0278014	14.9599	0.0480857	14.9843	0.00723545
14.6955	0.0278986	14.9685	0.0490249	14.9931	0.00739015
14.7041	0.0279921	14.977	0.049919	15.0018	0.00754944
14.7126	0.0280818	14.9855	0.0507644	15.0106	0.00771552
14.7211	0.0281748	14.9941	0.0515597	15.0194	0.00788459
14.7297	0.0282904	15.0026	0.0523063	15.0282	0.00805708
14.7382	0.0284079	15.0111	0.0530058	15.0369	0.00823755
14.7467	0.0285177	15.0197	0.0536606	15.0457	0.00842644
14.7553	0.0286176	15.0282	0.0542735	15.0545	0.00861799
14.7638	0.0287075	15.0367	0.0548473	15.0633	0.00880822
14.7723	0.0287869	15.0453	0.0553849	15.072	0.00899916
14.7809	0.028857	15.0538	0.0558899	15.0808	0.00918642
14.7894	0.0289414	15.0623	0.0563665	15.0896	0.00937308
14.7979	0.0290863	15.0709	0.0568203	15.0983	0.00956669
14.8065	0.0292672	15.0794	0.0572587	15.1071	0.00976174
14.815	0.0294618	15.0879	0.0576918	15.1159	0.00995787
14.8235	0.029641	15.0965	0.0581324	15.1247	0.0101588
14.8321	0.0298018	15.105	0.0585961	15.1334	0.010364
14.8406	0.0299803	15.1135	0.059101	15.1422	0.0105682
14.8491	0.0301929	15.1221	0.0596655	15.151	0.0107689
14.8577	0.0304027	15.1306	0.0603068	15.1597	0.0109642
14.8662	0.0306051	15.1391	0.0610383	15.1685	0.0111523
14.8747	0.0308204	15.1477	0.061867	15.1773	0.011338
14.8833	0.0310762	15.1562	0.0627926	15.1861	0.0115241
14.8918	0.0313336	15.1647	0.0638065	15.1948	0.0117098
14.9003	0.0316385	15.1733	0.0648928	15.2036	0.0118969
14.9089	0.0319367	15.1818	0.0660307	15.2124	0.0120822
14.9174	0.032244	15.1903	0.0671968	15.2211	0.0122666
14.9259	0.0325746	15.1989	0.068368	15.2299	0.012451
14.9345	0.0328974	15.2074	0.0695238	15.2387	0.0126306
14.943	0.0332036	15.2159	0.0706476	15.2475	0.0127995
14.9515	0.033516	15.2245	0.0717275	15.2562	0.0129564
14.9601	0.0338334	15.233	0.0727555	15.265	0.0131097
14.9686	0.0341387	15.2415	0.0737277	15.2738	0.0132623
14.9771	0.0344774	15.2501	0.0746428	15.2826	0.0134101
14.9857	0.0348112	15.2586	0.0755015	15.2913	0.0135513
14.9942	0.0351331	15.2671	0.0763056	15.3001	0.013686
15.0027	0.035465	15.2757	0.0770578	15.3089	0.0138192
15.0113	0.0358152	15.2842	0.0777611	15.3176	0.0139472
15.0198	0.0362047	15.2927	0.0784185	15.3264	0.0140638
15.0283	0.0365976	15.3013	0.079033	15.3352	0.0141716
15.0369	0.0369728	15.3098	0.0796076	15.344	0.0142683
15.0454	0.0373958	15.3183	0.080145	15.3527	0.0143612
15.0539	0.0378884	15.3269	0.0806479	15.3615	0.014449
15.0625	0.0383707	15.3354	0.0811186	15.3703	0.014529
15.071	0.0388461	15.3439	0.0815593	15.379	0.0146034
15.0795	0.0392939	15.3525	0.0819719	15.3878	0.014672
15.0881	0.0397125	15.361	0.0823582	15.3966	0.0147338
15.0966	0.0400929	15.3695	0.0827198	15.4054	0.0147883
15.1051	0.0404818	15.3781	0.0830582	15.4141	0.0148366
15.1137	0.0409193	15.3866	0.0833746	15.4229	0.014875
15.1222	0.0413768	15.3951	0.0836702	15.4317	0.0149049
15.1307	0.041856	15.4037	0.0839461	15.4404	0.0149299
15.1393	0.0423642	15.4122	0.0842034	15.4492	0.0149475
15.1478	0.0428397	15.4207	0.0844431	15.458	0.0149601
15.1563	0.0432753	15.4293	0.0846663	15.4668	0.0149601
15.1649	0.0436732	15.4378	0.0848738	15.4755	0.0149589
15.1734	0.0441009	15.4463	0.0850666	15.4843	0.0149577
15.1819	0.0445613	15.4549	0.0852457	15.4931	0.0149421
15.1905	0.0450289	15.4634	0.0854118	15.5019	0.0149223
15.199	0.045467	15.4719	0.0855658	15.5106	0.0148964
15.2075	0.0458669	15.4805	0.0857085	15.5194	0.0148683
15.2161	0.0462435	15.489	0.0858407	15.5282	0.0148383
15.2246	0.0466023	15.4975	0.0859631	15.5369	0.0148021
15.2331	0.0469383	15.5061	0.0860765	15.5457	0.0147589
15.2417	0.0472922	15.5146	0.0861816	15.5545	0.0147126
15.2502	0.0476837	15.5231	0.0862789	15.5633	0.0146658
15.2587	0.0480514	15.5317	0.0863692	15.572	0.0146116
15.2673	0.0483823	15.5402	0.0864528	15.5808	0.0145523
15.2758	0.0486786	15.5487	0.0865303	15.5896	0.0144945
15.2843	0.048944	15.5573	0.0866021	15.5983	0.0144338
15.2929	0.049243	15.5658	0.0866682	15.6071	0.014374
15.3014	0.049532	15.5743	0.0867285	15.6159	0.0143175
15.3099	0.049803	15.5829	0.0867823	15.6247	0.014257
15.3185	0.0500524	15.5914	0.0868282	15.6334	0.0141939
15.327	0.0502864	15.5999	0.0868633	15.6422	0.0141295
15.3355	0.0505011	15.6085	0.0868831	15.651	0.0140666
15.3441	0.0506947	15.617	0.0868807	15.6597	0.0140019
15.3526	0.0508689	15.6255	0.0868465	15.6685	0.0139341
15.3611	0.0510309	15.6341	0.086768	15.6773	0.0138682
15.3697	0.0511791	15.6426	0.0866309	15.6861	0.0138017
15.3782	0.0513122	15.6511	0.0864195	15.6948	0.013739
15.3867	0.0514227	15.6597	0.0861191	15.7036	0.0136833
15.3953	0.0515113	15.6682	0.0857179	15.7124	0.0136258
15.4038	0.0515716	15.6767	0.085209	15.7212	0.0135687
15.4123	0.0515772	15.6853	0.0845916	15.7299	0.0135136
15.4209	0.0515848	15.6938	0.0838722	15.7387	0.0134612
15.4294	0.0515983	15.7023	0.0830632	15.7475	0.0134099
15.4379	0.0516075	15.7109	0.082182	15.7562	0.0133559
15.4465	0.0516111	15.7194	0.0812491	15.765	0.0133058
15.455	0.0516069	15.7279	0.0802851	15.7738	0.0132604
15.4635	0.0515797	15.7365	0.0793099	15.7826	0.0132217
15.4721	0.0515225	15.745	0.0783409	15.7913	0.0131862
15.4806	0.0514629	15.7535	0.077392	15.8001	0.0131542
15.4891	0.0514057	15.7621	0.076474	15.8089	0.0131247
15.4977	0.0513461	15.7706	0.0755943	15.8176	0.0130946
15.5062	0.0512678	15.7791	0.0747574	15.8264	0.0130708
15.5147	0.0511737	15.7877	0.0739654	15.8352	0.0130487
15.5233	0.0510446	15.7962	0.073219	15.844	0.0130239
15.5318	0.0508568	15.8047	0.0725172	15.8527	0.013004
15.5403	0.0506509	15.8133	0.0718584	15.8615	0.0129884
15.5489	0.0504648	15.8218	0.0712405	15.8703	0.0129749
15.5574	0.0502938	15.8303	0.0706612	15.879	0.0129679
15.5659	0.0501349	15.8389	0.070118	15.8878	0.012963
15.5745	0.0499469	15.8474	0.0696087	15.8966	0.0129598
15.583	0.0497319	15.8559	0.0691308	15.9054	0.0129594
15.5915	0.0495224	15.8645	0.0686825	15.9141	0.0129613
15.6001	0.0493229	15.873	0.0682617	15.9229	0.0129644
15.6086	0.0490476	15.8815	0.0678663	15.9317	0.0129698
15.6171	0.0487447	15.8901	0.0674949	15.9405	0.0129796
15.6257	0.0484486	15.8986	0.0671462	15.9492	0.0129916
15.6342	0.0481766	15.9071	0.0668189	15.958	0.0130064
15.6427	0.0479286	15.9156	0.066512	15.9668	0.0130243
15.6513	0.0476608	15.9242	0.0662242	15.9755	0.0130461
15.6598	0.0474019	15.9327	0.0659546	15.9843	0.0130678
15.6683	0.0471568	15.9412	0.065702	15.9931	0.0130881
15.6769	0.0469107	15.9498	0.0654656	16.0019	0.0131127
15.6854	0.0466699	15.9583	0.0652442	16.0106	0.0131391
15.6939	0.0463815	15.9668	0.065037	16.0194	0.0131638
15.7025	0.0460615	15.9754	0.064843	16.0282	0.0131914
15.711	0.0457614	15.9839	0.0646613	16.0369	0.0132207
15.7195	0.045487	15.9924	0.0644913	16.0457	0.0132501
15.7281	0.0451803	16.001	0.0643321	16.0545	0.0132831
15.7366	0.044883	16.0095	0.0641831	16.0633	0.0133177
15.7451	0.0445983	16.018	0.0640436	16.072	0.0133538
15.7537	0.0443244	16.0266	0.0639131	16.0808	0.0133903
15.7622	0.0440149	16.0351	0.0637908	16.0896	0.0134268
15.7707	0.0436743	16.0436	0.0636762	16.0983	0.0134668
15.7793	0.0433566	16.0522	0.0635688	16.1071	0.0135083
15.7878	0.0430678	16.0607	0.0634679	16.1159	0.0135522
15.7963	0.0428008	16.0692	0.063373	16.1247	0.0135924
15.8049	0.0425418	16.0778	0.0632835	16.1334	0.0136308
15.8134	0.0422882	16.0863	0.0631991	16.1422	0.0136753
15.8219	0.0420165	16.0948	0.0631193	16.151	0.0137189
15.8305	0.0417286	16.1034	0.0630438	16.1598	0.0137648
15.839	0.0414388	16.1119	0.0629723	16.1685	0.0138137
15.8475	0.0411341	16.1204	0.0629047	16.1773	0.0138636
15.8561	0.0408257	16.129	0.0628408	16.1861	0.0139151
15.8646	0.0405065	16.1375	0.0627803	16.1948	0.0139642
15.8731	0.0401967	16.146	0.0627233	16.2036	0.0140128
15.8817	0.0399156	16.1546	0.0626701	16.2124	0.014064
15.8902	0.0396633	16.1631	0.062621	16.2212	0.0141166
15.8987	0.0394211	16.1716	0.0625771	16.2299	0.0141694
15.9073	0.0391828	16.1802	0.0625396	16.2387	0.0142236
15.9158	0.0389624	16.1887	0.062511	16.2475	0.0142785
15.9243	0.0387345	16.1972	0.062495	16.2562	0.014334
15.9329	0.0385096	16.2058	0.062497	16.265	0.014393
15.9414	0.0382898	16.2143	0.0625245	16.2738	0.0144537
15.9499	0.0380765	16.2228	0.0625868	16.2826	0.0145146
15.9585	0.0378739	16.2314	0.0626952	16.2913	0.0145767
15.967	0.0376588	16.2399	0.0628619	16.3001	0.0146397
15.9755	0.0374553	16.2484	0.0630995	16.3089	0.0147033
15.9841	0.0372692	16.257	0.0634193	16.3176	0.0147666
15.9926	0.0370992	16.2655	0.0638305	16.3264	0.014829
16.0011	0.0369345	16.274	0.0643383	16.3352	0.0148933
16.0097	0.0367798	16.2826	0.0649435	16.344	0.0149641
16.0182	0.0366204	16.2911	0.0656416	16.3527	0.0150374
16.0267	0.0364502	16.2996	0.0664231	16.3615	0.0151122
16.0353	0.036231	16.3082	0.0672741	16.3703	0.0151872
16.0438	0.0360232	16.3167	0.0681775	16.3791	0.0152616
16.0523	0.0358364	16.3252	0.0691145	16.3878	0.0153376
16.0609	0.0356648	16.3338	0.0700663	16.3966	0.0154119
16.0694	0.0355097	16.3423	0.0710158	16.4054	0.0154127
16.0779	0.0353701	16.3508	0.0719482	16.4141	0.0154135
16.0865	0.035242	16.3594	0.0728522	16.4229	0.0154503
16.095	0.0351047	16.3679	0.0737196	16.4317	0.0155104
16.1035	0.0349631	16.3764	0.0745453	16.4405	0.0155954
16.1121	0.0348428	16.385	0.0753267	16.4492	0.0156821
16.1206	0.0347363	16.3935	0.0760632	16.458	0.0157695
16.1291	0.0346404	16.402	0.0767553	16.4668	0.0158571
16.1377	0.0345531	16.4106	0.0774046	16.4755	0.0159441
16.1462	0.0344489	16.4191	0.0780128	16.4843	0.0160322
16.1547	0.0343494	16.4276	0.0785822	16.4931	0.0161209
16.1633	0.0342591	16.4362	0.0791147	16.5019	0.0162107
16.1718	0.0341772	16.4447	0.0796124	16.5106	0.0163039
16.1803	0.0340922	16.4532	0.0800773	16.5194	0.0163998
16.1889	0.0340111	16.4618	0.0805113	16.5282	0.0165014
16.1974	0.0339233	16.4703	0.0809163	16.5369	0.016604
16.2059	0.0338207	16.4788	0.0812939	16.5457	0.016705
16.2145	0.0337463	16.4874	0.0816458	16.5545	0.0168076
16.223	0.0336845	16.4959	0.0819738	16.5633	0.0169073
16.2315	0.0336238	16.5044	0.0822793	16.572	0.0170075
16.2401	0.0335629	16.513	0.0825639	16.5808	0.0171114
16.2486	0.0334882	16.5215	0.0828291	16.5896	0.0172151
16.2571	0.0334526	16.53	0.083076	16.5984	0.0173188
16.2657	0.0334433	16.5386	0.0833061	16.6071	0.0174273
16.2742	0.0334385	16.5471	0.0835204	16.6159	0.0175376
16.2827	0.0334348	16.5556	0.0837202	16.6247	0.017649
16.2913	0.0334318	16.5642	0.0839064	16.6334	0.0177616
16.2998	0.0334388	16.5727	0.0840801	16.6422	0.0178746
16.3083	0.0334609	16.5812	0.0842423	16.651	0.0179854
16.3169	0.0334815	16.5898	0.0843939	16.6598	0.0180952
16.3254	0.033498	16.5983	0.0845359	16.6685	0.0182083
16.3339	0.0335051	16.6068	0.0846693	16.6773	0.0183201
16.3425	0.0335069	16.6154	0.0847956	16.6861	0.0184328
16.351	0.0335036	16.6239	0.0849166	16.6948	0.018548
16.3595	0.0335007	16.6324	0.0850349	16.7036	0.0186676
16.3681	0.0335105	16.641	0.0851545	16.7124	0.0187928
16.3766	0.0335273	16.6495	0.085281	16.7212	0.0189177
16.3851	0.0335493	16.658	0.0854222	16.7299	0.0190417
16.3937	0.0335819	16.6666	0.0855884	16.7387	0.0191645
16.4022	0.0336251	16.6751	0.0857922	16.7475	0.0192848
16.4107	0.0336722	16.6836	0.0860474	16.7562	0.0194076
16.4193	0.0337167	16.6922	0.086368	16.765	0.0195349
16.4278	0.0337562	16.7007	0.0867676	16.7738	0.0196668
16.4363	0.0337907	16.7092	0.0872566	16.7826	0.0198023
16.4449	0.0338052	16.7178	0.0878413	16.7913	0.01994
16.4534	0.0338274	16.7263	0.0885223	16.8001	0.0200816
16.4619	0.0338748	16.7348	0.0892946	16.8089	0.0202252
16.4705	0.033934	16.7434	0.0901475	16.8177	0.0203676
16.479	0.0340017	16.7519	0.0910659	16.8264	0.0205102
16.4875	0.0340729	16.7604	0.0920321	16.8352	0.0206515
16.4961	0.0341501	16.769	0.0930269	16.844	0.0207969
16.5046	0.0342171	16.7775	0.0940316	16.8527	0.0209495
16.5131	0.0342723	16.786	0.0950298	16.8615	0.0211047
16.5217	0.0343332	16.7946	0.0960075	16.8703	0.0212635
16.5302	0.0343909	16.8031	0.0969547	16.8791	0.0214302
16.5387	0.0344438	16.8116	0.0978651	16.8878	0.0216051
16.5473	0.0345185	16.8202	0.0987365	16.8966	0.0217824
16.5558	0.0346209	16.8287	0.0995707	16.9054	0.0219631
16.5643	0.0347425	16.8372	0.100374	16.9141	0.0221445
16.5729	0.0348653	16.8458	0.101155	16.9229	0.0223261
16.5814	0.0349865	16.8543	0.101929	16.9317	0.0225116
16.5899	0.0350992	16.8628	0.102712	16.9405	0.0227049
16.5985	0.035199	16.8714	0.103523	16.9492	0.0229081
16.607	0.0352868	16.8799	0.104381	16.958	0.0231203
16.6155	0.0353601	16.8884	0.105304	16.9668	0.0233411
16.6241	0.0354288	16.897	0.106304	16.9755	0.0235723
16.6326	0.0355156	16.9055	0.107389	16.9843	0.0238131
16.6411	0.0356094	16.914	0.10856	16.9931	0.0240578
16.6497	0.0357073	16.9226	0.109811	17.0019	0.0243038
16.6582	0.0358159	16.9311	0.111133	17.0106	0.0245511
16.6667	0.0360024	16.9396	0.112517	17.0194	0.0248092
16.6753	0.0361873	16.9482	0.113953	17.0282	0.02508
16.6838	0.036354	16.9567	0.115436	17.037	0.025363
16.6923	0.0365038	16.9652	0.116967	17.0457	0.0256595
16.7009	0.0366499	16.9738	0.11855	17.0545	0.0259678
16.7094	0.0368031	16.9823	0.120192	17.0633	0.0262939
16.7179	0.0369545	16.9908	0.121901	17.072	0.026636
16.7265	0.0370981	16.9994	0.123684	17.0808	0.0269893
16.735	0.0372336	17.0079	0.125544	17.0896	0.0273477
16.7435	0.0373759	17.0164	0.127482	17.0984	0.0277067
16.7521	0.0375308	17.025	0.129497	17.1071	0.0280832
16.7606	0.0377189	17.0335	0.131586	17.1159	0.0284858
16.7691	0.0378988	17.042	0.133747	17.1247	0.0289107
[truncated: 2,104 more rows]
