# Supplementary material for: Multivalency, autoinhibition, and protein disorder in the regulation of interactions of dynein intermediate chain with dynactin and the nuclear distribution protein
Source: eLife journal article supplement (doi:10.7554/elife.80217), 2022-11-23
Supplement: fig3-data1 [file Figure 3-source data 1.xlsx]

## Sheet: Helix Prediction
Thanks for using AGADIR
http://agadir.crg.es
Copyright @1997-2002, Lacroix E., Munoz V., Petukhov M. & Serrano, L.
pH 7
Temperature 298
Ionic Strength
Nterm free
Cterm free
Peptide 1 MQARREELLAKKARLAEIKRQRELRAQQAAGRSITPSELVSPTPSRANSRREIESLIDSILSSSAGANSPRRGSRPNSVISTGELSTDNASEITATTTGQLPSQPQPLSTVPLQTVYECPPSPVKEIISYSKGVQTTEEWTPRKSRGVGDSDDEDLGAAASPSKRLSRRERDREEELREKIRKEIEEELKATKELVADGVLKQSGAQNFPVRALTAEELDAVTKSVEFMDFIDRSTKVIEKALDQEYDILTDYTLQVHDV
res	aa	Hel
-0.082299
1	M	0
2	Q	0.1
3	A	0.3
4	R	2.1
5	R	10.9
6	E	14.9
7	E	16.4
8	L	20.4
9	L	25.4
10	A	27.6
11	K	27.9
12	K	26.5
13	A	25.9
14	R	25.1
15	L	26.1
16	A	26.2
17	E	24.8
18	I	25.7
19	K	22.7
20	R	19.4
21	Q	12
22	R	11.6
23	E	10.6
24	L	8.1
25	R	6.9
26	A	6.7
27	Q	4.7
28	Q	3.9
29	A	3.8
30	A	3.1
31	G	1.2
32	R	0.1
33	S	0
34	I	0
35	T	0
36	P	0.2
37	S	0.2
38	E	0.2
39	L	0.2
40	V	0.2
41	S	0
42	P	0
43	T	0
44	P	0.4
45	S	0.4
46	R	0.5
47	A	0.5
48	N	0.3
49	S	0.1
50	R	0.6
51	R	0.6
52	E	0.6
53	I	0.6
54	E	0.5
55	S	0.3
56	L	0.3
57	I	0.3
58	D	0.2
59	S	0.3
60	I	0.3
61	L	0.3
62	S	0.2
63	S	0
64	S	0
65	A	0
66	G	0
67	A	0
68	N	0
69	S	0
70	P	0.2
71	R	0.2
72	R	0.2
73	G	0.2
74	S	0
75	R	0
76	P	0
77	N	0
78	S	0
79	V	0
80	I	0
81	S	0
82	T	0
83	G	0
84	E	0
85	L	0
86	S	0
87	T	0.1
88	D	0.1
89	N	0.1
90	A	0.1
91	S	0
92	E	0
93	I	0
94	T	0
95	A	0
96	T	0
97	T	0
98	T	0
99	G	0
100	Q	0
101	L	0
102	P	0
103	S	0
104	Q	0
105	P	0
106	Q	0
107	P	0
108	L	0
109	S	0
110	T	0
111	V	0
112	P	0
113	L	0.1
114	Q	0.1
115	T	0.1
116	V	0.1
117	Y	0.1
118	E	0.1
119	C	0
120	P	0
121	P	0
122	S	0
123	P	0.2
124	V	0.2
125	K	0.2
126	E	0.2
127	I	0.2
128	I	0.2
129	S	0.2
130	Y	0
131	S	0
132	K	0
133	G	0
134	V	0
135	Q	0
136	T	0
137	T	0
138	E	0
139	E	0
140	W	0
141	T	0
142	P	0.1
143	R	0.1
144	K	0.1
145	S	0.1
146	R	0
147	G	0
148	V	0
149	G	0
150	D	0
151	S	0
152	D	0
153	D	0.1
154	E	0.7
155	D	0.8
156	L	1.8
157	G	1.8
158	A	1.5
159	A	1.3
160	A	1.3
161	S	0
162	P	0.4
163	S	0.5
164	K	0.5
165	R	0.6
166	L	0.4
167	S	0.3
168	R	17.8
169	R	18.1
170	E	19.3
171	R	20.5
172	D	21.5
173	R	60.3
174	E	68.7
175	E	70.1
176	E	71.7
177	L	75.2
178	R	74.9
179	E	73.4
180	K	71
181	I	70.9
182	R	66.7
183	K	60.2
184	E	53.9
185	I	53.9
186	E	53.2
187	E	50.7
188	E	42
189	L	40.3
190	K	31.4
191	A	13.6
192	T	13
193	K	7.4
194	E	4.3
195	L	2.3
196	V	2.1
197	A	1.4
198	D	0.9
199	G	0.4
200	V	0.7
201	L	0.6
202	K	0.6
203	Q	0.3
204	S	0.1
205	G	0
206	A	0
207	Q	0
208	N	0
209	F	0
210	P	0
211	V	0
212	R	0
213	A	0
214	L	0
215	T	0
216	A	2
217	E	2
218	E	2
219	L	2
220	D	1.5
221	A	4.2
222	V	4.1
223	T	4.1
224	K	3.7
225	S	1.4
226	V	1.4
227	E	0.5
228	F	0.2
229	M	0
230	D	0
231	F	0.2
232	I	0.2
233	D	0.2
234	R	0.6
235	S	0.4
236	T	0.5
237	K	0.5
238	V	0.5
239	I	0.5
240	E	0.3
241	K	0.1
242	A	0.1
243	L	0.1
244	D	0.1
245	Q	0
246	E	0
247	Y	0
248	D	0
249	I	0.3
250	L	0.3
251	T	0.3
252	D	0.3
253	Y	0.1
254	T	0.1
255	L	0.1
256	Q	0
257	V	0
258	H	0
259	D	0
260	V	0
Percentage helix 6.72

## Sheet: CD
IC260 CD														IC88 CD												IC100-260 CD												IC160-240 CD
Wavelength	5	10	15	20	25	30	35	40	45	50	60	70		Wavelength	5	10	15	20	25	30	35	40	45	50		Wavelength	5	10	15	20	25	30	35	40	45	50		Wavelength	5	10	15	20	25	30	35	40	45
250	0	0	0	0	0	0	0	0	0	0	0	0		260	-0.118338	-0.147724	-0.120525	-0.183118	-0.206431	-0.143061	-0.16665	-0.221989	-0.227585	-0.26842		250	0	0	0	0	0	0	0	0	0	0		250	0	0	0	0	0	0	0	0	0
249.5	-0.0148458	-0.0118038	-0.0150065	-0.0253423	0.0157615	0.0102788	-0.0220112	0.0192146	0.0145462	0.00731154	-0.0234962	-0.045325		259.5	-0.116179	-0.140356	-0.117036	-0.179432	-0.197169	-0.162685	-0.174059	-0.209278	-0.241555	-0.267991		249	-0.0283435	-0.0487534	-0.0621851	-0.0717665	-0.0366764	-0.0649248	-0.0483683	-0.0655	-0.0658112	-0.0894075		249	-0.097995	-0.0874075	-0.0806763	-0.076	-0.0158537	-0.0355525	-0.08938	-0.0172463	0.0456375
249	-0.0234481	-0.0405838	0.019665	-0.0629919	0.0176435	0.0225819	-0.0416577	0.0206958	0.00484961	-0.0110808	-0.00318846	-0.0908858		259	-0.124098	-0.132747	-0.111157	-0.171691	-0.19386	-0.171257	-0.210844	-0.207524	-0.232722	-0.285919		248	-0.0639615	-0.0964634	-0.131177	-0.133107	-0.0765714	-0.132561	-0.0930671	-0.129106	-0.134349	-0.169248		248	-0.186134	-0.176846	-0.181657	-0.158878	-0.0472687	-0.0754688	-0.183583	-0.0635225	0.0399875
248.5	-0.0593173	-0.0651835	0.0318638	-0.103322	0.0162023	0.00232308	-0.0550212	-0.00112231	-0.00535538	-0.00095	-0.0149192	-0.0959512		258.5	-0.118069	-0.100317	-0.140268	-0.155754	-0.224248	-0.198292	-0.207694	-0.224044	-0.253713	-0.287223		247	-0.107923	-0.147896	-0.204904	-0.184364	-0.122524	-0.199614	-0.131545	-0.194307	-0.20287	-0.236218		247	-0.266229	-0.276729	-0.294552	-0.249014	-0.103582	-0.131559	-0.289112	-0.14039	-0.0434112
248	-0.102317	-0.0675035	0.0481112	-0.0902546	0.0281512	-0.0318469	-0.0926973	-0.0305108	-0.0268485	-0.0354615	-0.028	-0.0565858		258	-0.132396	-0.0976081	-0.13997	-0.150369	-0.200983	-0.208012	-0.207376	-0.220807	-0.271451	-0.276294		246	-0.157732	-0.213105	-0.277366	-0.236727	-0.178388	-0.264317	-0.167725	-0.266446	-0.269035	-0.295547		246	-0.351184	-0.393242	-0.397373	-0.351134	-0.19634	-0.222724	-0.414197	-0.244066	-0.190392
247.5	-0.139616	-0.0401742	0.0383712	-0.0612662	0.0213881	-0.106094	-0.0873665	-0.0963246	-0.0497738	-0.0745769	-0.0256192	-0.0885704		257.5	-0.142904	-0.103779	-0.171834	-0.154657	-0.199825	-0.198868	-0.228669	-0.230204	-0.2668	-0.304374		245	-0.216315	-0.298687	-0.352214	-0.304171	-0.248784	-0.335273	-0.21297	-0.34965	-0.338147	-0.360932		245	-0.454207	-0.523513	-0.491155	-0.483349	-0.342704	-0.365965	-0.565699	-0.391941	-0.361955
247	-0.153254	-0.0480365	-0.0409038	-0.0513669	-0.0304277	-0.170461	-0.110643	-0.145628	-0.0713546	-0.07725	-0.08265	-0.0613619		257	-0.132714	-0.109577	-0.184054	-0.141041	-0.1838	-0.222806	-0.245067	-0.25665	-0.283049	-0.328186		244	-0.295488	-0.399783	-0.4454	-0.396789	-0.335749	-0.424043	-0.278907	-0.447563	-0.419439	-0.44805		244	-0.585006	-0.666095	-0.609611	-0.660981	-0.549314	-0.567209	-0.748499	-0.600979	-0.53693
246.5	-0.153473	-0.0397369	-0.0835804	-0.0783619	-0.0841835	-0.183822	-0.136228	-0.192928	-0.11682	-0.0906962	-0.107	-0.135636		256.5	-0.151696	-0.125781	-0.185756	-0.166779	-0.191894	-0.255852	-0.262636	-0.283721	-0.30147	-0.324136		243	-0.408006	-0.507714	-0.569773	-0.519678	-0.438724	-0.532192	-0.372038	-0.560396	-0.517855	-0.560889		243	-0.757306	-0.833708	-0.791424	-0.879319	-0.802764	-0.819846	-0.969261	-0.855266	-0.731468
246	-0.170816	-0.0930004	-0.127037	-0.134337	-0.112576	-0.232968	-0.137897	-0.200678	-0.157439	-0.127265	-0.14035	-0.141863		256	-0.163616	-0.163525	-0.220488	-0.167619	-0.217063	-0.257593	-0.263557	-0.283149	-0.303129	-0.316152		242	-0.557708	-0.628553	-0.720667	-0.67364	-0.559979	-0.654943	-0.493684	-0.683197	-0.63352	-0.688454		242	-0.986756	-1.05067	-1.04699	-1.12801	-1.08643	-1.10927	-1.23399	-1.12172	-0.970005
245.5	-0.204984	-0.134668	-0.117894	-0.176898	-0.104407	-0.257303	-0.167463	-0.185059	-0.163812	-0.201973	-0.151773	-0.162636		255.5	-0.174296	-0.173312	-0.240305	-0.194107	-0.223966	-0.26824	-0.258357	-0.309447	-0.311015	-0.345059		241	-0.740509	-0.784627	-0.884251	-0.854622	-0.706047	-0.795124	-0.640771	-0.813048	-0.767601	-0.820007		241	-1.27644	-1.34048	-1.35841	-1.41257	-1.39884	-1.41985	-1.53879	-1.39468	-1.2553
245	-0.238165	-0.16486	-0.140048	-0.191841	-0.10793	-0.283038	-0.217074	-0.226609	-0.212412	-0.272965	-0.155531	-0.197724		255	-0.183069	-0.19016	-0.252808	-0.213203	-0.234561	-0.270399	-0.282668	-0.326789	-0.308517	-0.361635		240	-0.954348	-0.993087	-1.06025	-1.05609	-0.881439	-0.963726	-0.810007	-0.955166	-0.926153	-0.957653		240	-1.62184	-1.71513	-1.71344	-1.74979	-1.75074	-1.74757	-1.872	-1.70347	-1.57858
244.5	-0.274011	-0.230745	-0.212806	-0.216418	-0.136295	-0.339326	-0.282705	-0.265759	-0.283978	-0.279065	-0.173815	-0.245955		254.5	-0.18453	-0.212626	-0.287195	-0.214481	-0.284908	-0.27483	-0.272644	-0.349012	-0.343591	-0.382117		239	-1.20386	-1.25273	-1.26874	-1.27652	-1.08556	-1.16636	-1.0051	-1.119	-1.11708	-1.11166		239	-2.03684	-2.17276	-2.12834	-2.15648	-2.15421	-2.11277	-2.23164	-2.0739	-1.94224
244	-0.339745	-0.250533	-0.275783	-0.226852	-0.252268	-0.355099	-0.35059	-0.316459	-0.350982	-0.298646	-0.230596	-0.29594		254	-0.195468	-0.221245	-0.277965	-0.219093	-0.291408	-0.308179	-0.283818	-0.362046	-0.367799	-0.360583		238	-1.49469	-1.5543	-1.53231	-1.52476	-1.31847	-1.39814	-1.23498	-1.31328	-1.3416	-1.29267		238	-2.55507	-2.70706	-2.6297	-2.65243	-2.61988	-2.55268	-2.63571	-2.50374	-2.35874
243.5	-0.406568	-0.31041	-0.363717	-0.279148	-0.282445	-0.373915	-0.41144	-0.33784	-0.434916	-0.304981	-0.296173	-0.35752		253.5	-0.225314	-0.230298	-0.296561	-0.231759	-0.323549	-0.316021	-0.279479	-0.364901	-0.378309	-0.361917		237	-1.8288	-1.89249	-1.85886	-1.81573	-1.58597	-1.65422	-1.50199	-1.54615	-1.58918	-1.51076		237	-3.19743	-3.32027	-3.22629	-3.25689	-3.15906	-3.08988	-3.11144	-2.98424	-2.83567
243	-0.491084	-0.387541	-0.450033	-0.344291	-0.348583	-0.411145	-0.471178	-0.413698	-0.469082	-0.363058	-0.360212	-0.422728		253	-0.24243	-0.230262	-0.320715	-0.239782	-0.328666	-0.342684	-0.290518	-0.367527	-0.407679	-0.391412		236	-2.20917	-2.2661	-2.24308	-2.1598	-1.89558	-1.93802	-1.79709	-1.82231	-1.84483	-1.77074		236	-3.95652	-4.02332	-3.91121	-3.96954	-3.78249	-3.71245	-3.6765	-3.52402	-3.37153
242.5	-0.533857	-0.440645	-0.51256	-0.422464	-0.372037	-0.474934	-0.504517	-0.494255	-0.544251	-0.438688	-0.4213	-0.418036		252.5	-0.248013	-0.219538	-0.332507	-0.276062	-0.327398	-0.373942	-0.332617	-0.399221	-0.428392	-0.436353		235	-2.64346	-2.67562	-2.67558	-2.55632	-2.24828	-2.25538	-2.10883	-2.13615	-2.1031	-2.06299		235	-4.81606	-4.82221	-4.68061	-4.76579	-4.4909	-4.39307	-4.32956	-4.13467	-3.96328
242	-0.590768	-0.508325	-0.590121	-0.499522	-0.467922	-0.569265	-0.561005	-0.602963	-0.612535	-0.533469	-0.492812	-0.426728		252	-0.26025	-0.24384	-0.360791	-0.305565	-0.358788	-0.388951	-0.36867	-0.423886	-0.445102	-0.455098		234	-3.1361	-3.12355	-3.14629	-2.99585	-2.63538	-2.60604	-2.43307	-2.47181	-2.37192	-2.36632		234	-5.76668	-5.70783	-5.53481	-5.61729	-5.26485	-5.11813	-5.0544	-4.80805	-4.60662
241.5	-0.633215	-0.583452	-0.651087	-0.609941	-0.604572	-0.675242	-0.636313	-0.715655	-0.679093	-0.630792	-0.585873	-0.439424		251.5	-0.304826	-0.270131	-0.363739	-0.342116	-0.384105	-0.420955	-0.385958	-0.451115	-0.453893	-0.492072		233	-3.6789	-3.61255	-3.64409	-3.46481	-3.0432	-2.98384	-2.77117	-2.8125	-2.66102	-2.66403		233	-6.79891	-6.66202	-6.46586	-6.50647	-6.07235	-5.88357	-5.83091	-5.52458	-5.28459
241	-0.690615	-0.654825	-0.67806	-0.740564	-0.719364	-0.812757	-0.74137	-0.798328	-0.775755	-0.742792	-0.719954	-0.58032		251	-0.314344	-0.28893	-0.392005	-0.385113	-0.395495	-0.469292	-0.422374	-0.456206	-0.494071	-0.531161		232	-4.25324	-4.13964	-4.15776	-3.94893	-3.461	-3.38156	-3.12302	-3.15069	-2.97057	-2.95358		232	-7.89206	-7.67043	-7.45439	-7.41923	-6.89276	-6.675	-6.63967	-6.26982	-5.97255
240.5	-0.777757	-0.75461	-0.808313	-0.840106	-0.830818	-0.918307	-0.87552	-0.901313	-0.896728	-0.866269	-0.849942	-0.711532		250.5	-0.320093	-0.31175	-0.415699	-0.408708	-0.419531	-0.48652	-0.444618	-0.478777	-0.527908	-0.595795		231	-4.83917	-4.69129	-4.67831	-4.43899	-3.88326	-3.79179	-3.48576	-3.48908	-3.29277	-3.24107		231	-9.01107	-8.72036	-8.47536	-8.33896	-7.72651	-7.47731	-7.45505	-7.02917	-6.66333
240	-0.897284	-0.828098	-0.886094	-0.993341	-0.948868	-1.07288	-1.0175	-0.986967	-0.984655	-0.983188	-0.950004	-0.837663		250	-0.33534	-0.349589	-0.433456	-0.429111	-0.442252	-0.473277	-0.500947	-0.531777	-0.566887	-0.655635		230	-5.4215	-5.24534	-5.19857	-4.93421	-4.3051	-4.2054	-3.85503	-3.82824	-3.6185	-3.53252		230	-10.1161	-9.78548	-9.49909	-9.24979	-8.57871	-8.29393	-8.24336	-7.77835	-7.36411
239.5	-1.03692	-0.995525	-1.01739	-1.14957	-1.06429	-1.20511	-1.15554	-1.1071	-1.13294	-1.11823	-1.06357	-0.848643		249.5	-0.345047	-0.366099	-0.460583	-0.444917	-0.492878	-0.488081	-0.537868	-0.561726	-0.594346	-0.716805		229	-5.98918	-5.77765	-5.70826	-5.43348	-4.71987	-4.61102	-4.22109	-4.15728	-3.93829	-3.82999		229	-11.1853	-10.8237	-10.4891	-10.1305	-9.44004	-9.12336	-8.98056	-8.48968	-8.05868
239	-1.18134	-1.15253	-1.15078	-1.29916	-1.18324	-1.33473	-1.29032	-1.26191	-1.28043	-1.26057	-1.17123	-0.890328		249	-0.388069	-0.434577	-0.4901	-0.465084	-0.534581	-0.520226	-0.567056	-0.564296	-0.634807	-0.752891		228	-6.52918	-6.26934	-6.19247	-5.92309	-5.11981	-4.99465	-4.56801	-4.46443	-4.24336	-4.12811		228	-12.2201	-11.794	-11.4092	-10.9518	-10.2821	-9.92451	-9.66665	-9.14222	-8.70145
238.5	-1.35597	-1.35858	-1.30392	-1.4369	-1.35443	-1.52191	-1.42908	-1.42609	-1.46185	-1.41033	-1.31382	-0.858428		248.5	-0.418413	-0.479574	-0.531003	-0.470471	-0.55869	-0.557435	-0.590201	-0.586461	-0.679946	-0.784196		227	-7.02359	-6.71369	-6.63987	-6.37706	-5.4937	-5.34078	-4.88327	-4.75029	-4.52772	-4.41126		227	-13.2079	-12.6708	-12.2373	-11.6973	-11.0638	-10.639	-10.3077	-9.72392	-9.25979
238	-1.5251	-1.52509	-1.55483	-1.59376	-1.48813	-1.65661	-1.58441	-1.58842	-1.61069	-1.5546	-1.4516	-0.892651		248	-0.444833	-0.493126	-0.552157	-0.511558	-0.613497	-0.568974	-0.640052	-0.626997	-0.72032	-0.815415		226	-7.45688	-7.11667	-7.04713	-6.77079	-5.82727	-5.63867	-5.16408	-5.01914	-4.78345	-4.66081		226	-14.0931	-13.4423	-12.9678	-12.3736	-11.7473	-11.2389	-10.8883	-10.2301	-9.73953
237.5	-1.72045	-1.70854	-1.75196	-1.74209	-1.71572	-1.87625	-1.7926	-1.75398	-1.78463	-1.73061	-1.62916	-1.01638		247.5	-0.489822	-0.545903	-0.573225	-0.553992	-0.680377	-0.586089	-0.707529	-0.683199	-0.734782	-0.840566		225	-7.82347	-7.48127	-7.40887	-7.09526	-6.11125	-5.88911	-5.41086	-5.26243	-4.9988	-4.872		225	-14.8114	-14.103	-13.5926	-12.9788	-12.316	-11.7284	-11.3732	-10.6645	-10.1656
237	-1.91931	-1.91041	-1.96954	-1.94588	-1.94503	-2.06824	-2.01155	-1.93978	-1.97975	-1.95167	-1.82746	-1.11764		247	-0.549687	-0.580036	-0.629058	-0.628964	-0.762874	-0.654363	-0.758922	-0.729852	-0.76295	-0.89057		224	-8.12384	-7.79506	-7.70912	-7.35899	-6.34615	-6.10265	-5.62162	-5.46288	-5.17224	-5.0593		224	-15.3443	-14.6425	-14.0906	-13.4828	-12.7731	-12.1182	-11.7342	-11.0418	-10.5544
236.5	-2.10059	-2.13087	-2.18916	-2.15418	-2.20034	-2.31386	-2.26128	-2.15782	-2.19082	-2.21333	-1.9866	-1.29381		246.5	-0.592946	-0.629684	-0.690952	-0.708418	-0.810277	-0.710103	-0.784776	-0.78838	-0.813671	-0.942253		223	-8.36067	-8.04394	-7.93241	-7.57421	-6.53783	-6.28855	-5.79547	-5.61474	-5.32187	-5.23785		223	-15.7184	-15.0395	-14.4434	-13.8596	-13.1165	-12.4209	-11.9756	-11.3783	-10.902
236	-2.32798	-2.41592	-2.39228	-2.42469	-2.48538	-2.56444	-2.49835	-2.42026	-2.41792	-2.42219	-2.1683	-1.40752		246	-0.648868	-0.683697	-0.746089	-0.792763	-0.84022	-0.755829	-0.853494	-0.878009	-0.866685	-0.990877		222	-8.53937	-8.23313	-8.08111	-7.74539	-6.69367	-6.44551	-5.9357	-5.73092	-5.46864	-5.40152		222	-15.9624	-15.2842	-14.6579	-14.1185	-13.3345	-12.6577	-12.1405	-11.6692	-11.1895
235.5	-2.55739	-2.67253	-2.69762	-2.71319	-2.71117	-2.8095	-2.71505	-2.67189	-2.62661	-2.65285	-2.37119	-1.41266		245.5	-0.703074	-0.719508	-0.80893	-0.859073	-0.888776	-0.827583	-0.894903	-0.976066	-0.939314	-1.06727		221	-8.6675	-8.38096	-8.17645	-7.87806	-6.82404	-6.56638	-6.05054	-5.82966	-5.61445	-5.52861		221	-16.089	-15.4097	-14.7665	-14.2897	-13.4356	-12.8467	-12.284	-11.8846	-11.3996
235	-2.8755	-2.94916	-3.00673	-2.99236	-2.97876	-3.04946	-2.95935	-2.95723	-2.91516	-2.85387	-2.59369	-1.54425		245	-0.787971	-0.779234	-0.896361	-0.938957	-0.96522	-0.927802	-0.972051	-1.05573	-1.02268	-1.13186		220	-8.75384	-8.49891	-8.24403	-7.98675	-6.93845	-6.64979	-6.15526	-5.92333	-5.74467	-5.61064		220	-16.1165	-15.4748	-14.8086	-14.398	-13.4659	-12.9939	-12.4369	-12.0026	-11.531
234.5	-3.18637	-3.17819	-3.30823	-3.23238	-3.20762	-3.30284	-3.21155	-3.21751	-3.19374	-3.13326	-2.84849	-1.66887		244.5	-0.86168	-0.907053	-0.999853	-1.02775	-1.02874	-1.02584	-1.05328	-1.13273	-1.11732	-1.21996		219	-8.81235	-8.59077	-8.30322	-8.08309	-7.03994	-6.70383	-6.26365	-6.01986	-5.84961	-5.66639		219	-16.0863	-15.5152	-14.818	-14.4575	-13.4826	-13.1017	-12.5951	-12.0401	-11.5969
234	-3.51556	-3.47191	-3.63484	-3.50855	-3.49503	-3.62408	-3.49524	-3.54082	-3.50015	-3.43575	-3.0857	-1.74936		244	-0.930214	-1.00485	-1.08551	-1.12804	-1.09937	-1.10703	-1.1245	-1.25111	-1.24159	-1.31982		218	-8.86365	-8.66605	-8.36893	-8.16483	-7.12752	-6.74507	-6.3752	-6.12389	-5.93905	-5.72353		218	-16.0521	-15.5345	-14.8269	-14.4858	-13.5254	-13.1823	-12.7402	-12.0507	-11.6257
233.5	-3.86541	-3.79794	-3.88508	-3.83398	-3.80769	-3.95623	-3.74163	-3.80771	-3.75856	-3.7292	-3.32341	-1.86413		243.5	-1.01713	-1.10251	-1.17808	-1.23839	-1.19435	-1.22546	-1.2136	-1.3607	-1.36308	-1.39842		217	-8.93198	-8.74443	-8.45825	-8.23315	-7.20733	-6.79998	-6.47998	-6.23551	-6.03328	-5.79908		217	-16.0538	-15.544	-14.8681	-14.5112	-13.6163	-13.2608	-12.868	-12.1017	-11.6634
233	-4.1998	-4.15883	-4.19896	-4.20498	-4.1235	-4.28773	-4.05548	-4.07309	-4.02483	-4.05481	-3.57122	-1.97479		243	-1.11154	-1.20726	-1.26924	-1.33224	-1.29981	-1.37291	-1.34081	-1.46823	-1.49709	-1.49961		216	-9.04129	-8.85114	-8.589	-8.31421	-7.29882	-6.89638	-6.58011	-6.35768	-6.14502	-5.90638		216	-16.1064	-15.584	-14.9585	-14.5701	-13.7706	-13.3732	-13.0054	-12.2443	-11.7549
232.5	-4.54284	-4.51652	-4.52854	-4.58394	-4.47285	-4.59708	-4.38452	-4.3884	-4.33949	-4.33743	-3.79976	-2.18056		242.5	-1.24313	-1.30764	-1.37119	-1.45117	-1.45301	-1.52828	-1.46176	-1.57605	-1.6138	-1.59162		215	-9.20924	-9.00779	-8.77316	-8.44917	-7.43255	-7.04818	-6.69657	-6.50364	-6.28036	-6.06607		215	-16.2216	-15.7107	-15.0974	-14.709	-14.002	-13.5683	-13.1972	-12.4966	-11.9307
232	-4.90891	-4.85506	-4.85965	-4.94894	-4.80054	-4.91485	-4.73202	-4.70582	-4.68999	-4.64147	-4.02957	-2.44427		242	-1.36687	-1.42309	-1.5295	-1.58267	-1.60346	-1.66931	-1.62606	-1.70426	-1.73471	-1.75426		214	-9.44371	-9.22798	-9.02117	-8.66309	-7.63659	-7.25743	-6.8575	-6.6901	-6.45645	-6.29427		214	-16.4309	-15.9722	-15.3045	-14.9808	-14.3211	-13.8957	-13.4876	-12.8567	-12.228
231.5	-5.27076	-5.20444	-5.25415	-5.29094	-5.14485	-5.26192	-5.11779	-5.02763	-5.05033	-4.89458	-4.25368	-2.55667		241.5	-1.50734	-1.56564	-1.65288	-1.74805	-1.73835	-1.81679	-1.78017	-1.86909	-1.87049	-1.92945		213	-9.75353	-9.52506	-9.34956	-8.95886	-7.91932	-7.53091	-7.09023	-6.92482	-6.70266	-6.58495		213	-16.7851	-16.3903	-15.6478	-15.4182	-14.7411	-14.3798	-13.9196	-13.3267	-12.6942
231	-5.61018	-5.59202	-5.62969	-5.61483	-5.48635	-5.59031	-5.45894	-5.37144	-5.3561	-5.19862	-4.51226	-2.67395		241	-1.68789	-1.71368	-1.7902	-1.91239	-1.92193	-2.00596	-1.94738	-2.05069	-2.03322	-2.09504		212	-10.1604	-9.91878	-9.77583	-9.34116	-8.26938	-7.87843	-7.41744	-7.20718	-7.03564	-6.91508		212	-17.3313	-16.9594	-16.2051	-16.0161	-15.2851	-15.0167	-14.528	-13.9156	-13.3412
230.5	-5.97776	-6.02209	-6.02531	-5.94256	-5.88916	-5.93442	-5.8054	-5.6799	-5.67206	-5.499	-4.78976	-2.70679		240.5	-1.85756	-1.89567	-1.99138	-2.08034	-2.10484	-2.21146	-2.1362	-2.2189	-2.21661	-2.26547		211	-10.6848	-10.4205	-10.3032	-9.82271	-8.67435	-8.29166	-7.84079	-7.53644	-7.4393	-7.26731		211	-18.0796	-17.6663	-16.9893	-16.7535	-15.9813	-15.7904	-15.3111	-14.6361	-14.1232
230	-6.40372	-6.39209	-6.37334	-6.31379	-6.25043	-6.30196	-6.14413	-5.99363	-5.95222	-5.81362	-5.00334	-2.80167		240	-2.07217	-2.10148	-2.22293	-2.26014	-2.27662	-2.38704	-2.34375	-2.43334	-2.39787	-2.45643		210	-11.3117	-11.0102	-10.9067	-10.3904	-9.1259	-8.74042	-8.32017	-7.91296	-7.87092	-7.64166		210	-18.979	-18.4934	-17.9164	-17.6061	-16.8349	-16.6692	-16.221	-15.4943	-14.9877
229.5	-6.79695	-6.79721	-6.67831	-6.67548	-6.59335	-6.64481	-6.46182	-6.30628	-6.2851	-6.13212	-5.19638	-2.95011		239.5	-2.3229	-2.34067	-2.4721	-2.50616	-2.50415	-2.61111	-2.56312	-2.64999	-2.61263	-2.66947		209	-11.9786	-11.6347	-11.5273	-10.9796	-9.59913	-9.18451	-8.78396	-8.32588	-8.28073	-8.03874		209	-19.9193	-19.3897	-18.8501	-18.5132	-17.7931	-17.5853	-17.1895	-16.4603	-15.9109
229	-7.17615	-7.14456	-7.05977	-7.04406	-6.90158	-6.97308	-6.79944	-6.61894	-6.5506	-6.41685	-5.41568	-3.10472		239	-2.56332	-2.63065	-2.71731	-2.77995	-2.75457	-2.82424	-2.82014	-2.90243	-2.85912	-2.91162		208	-12.5961	-12.2232	-12.0845	-11.5005	-10.0395	-9.57992	-9.17265	-8.73526	-8.62632	-8.43563		208	-20.7663	-20.2419	-19.6706	-19.362	-18.7406	-18.4524	-18.14	-17.4469	-16.8525
228.5	-7.49995	-7.49421	-7.40261	-7.37152	-7.22358	-7.27692	-7.11555	-6.9294	-6.8711	-6.7202	-5.62565	-3.2165		238.5	-2.87454	-2.92043	-2.92484	-3.05398	-3.04652	-3.0904	-3.10406	-3.16492	-3.14964	-3.10561		207	-13.0796	-12.7036	-12.5086	-11.8874	-10.381	-9.88153	-9.46315	-9.07625	-8.88483	-8.78545		207	-21.3961	-20.8918	-20.2914	-20.0317	-19.5378	-19.1902	-18.9725	-18.3369	-17.7184
228	-7.84299	-7.82902	-7.70619	-7.6326	-7.53677	-7.51619	-7.37371	-7.25144	-7.15075	-6.99385	-5.86053	-3.23448		238	-3.17268	-3.23935	-3.2216	-3.34259	-3.36117	-3.36452	-3.41215	-3.4115	-3.43149	-3.34212		206	-13.3737	-13.0106	-12.7627	-12.1168	-10.577	-10.0558	-9.64719	-9.29371	-9.05427	-9.04098		206	-21.6985	-21.1965	-20.6364	-20.4393	-20.0743	-19.7109	-19.5801	-19.0246	-18.3976
227.5	-8.19376	-8.12202	-7.99154	-7.9251	-7.81889	-7.73838	-7.64386	-7.52224	-7.43887	-7.236	-6.07622	-3.28862		237.5	-3.53526	-3.5686	-3.59648	-3.64728	-3.6699	-3.67738	-3.7273	-3.67812	-3.70376	-3.6033		205	-13.4597	-13.0891	-12.8306	-12.1883	-10.6062	-10.0917	-9.70098	-9.36843	-9.13204	-9.17458		205	-21.5716	-21.0913	-20.6473	-20.5285	-20.2851	-19.9187	-19.9067	-19.4364	-18.8286
227	-8.4818	-8.42017	-8.25008	-8.19702	-8.10943	-7.98231	-7.89252	-7.81159	-7.69541	-7.42016	-6.26838	-3.36806		237	-3.94022	-3.94341	-3.98861	-4.02519	-4.0333	-4.0028	-4.06478	-4.00289	-4.0092	-3.88346		204	-13.3294	-12.9026	-12.6904	-12.0936	-10.4488	-9.98607	-9.58762	-9.29818	-9.09669	-9.17681		204	-20.9398	-20.5828	-20.2996	-20.2333	-20.1218	-19.7489	-19.9479	-19.5306	-19.0025
226.5	-8.75741	-8.64409	-8.53231	-8.45548	-8.35408	-8.26165	-8.07098	-8.05228	-7.90422	-7.61335	-6.51776	-3.6034		236.5	-4.34244	-4.36078	-4.40198	-4.46797	-4.43943	-4.39291	-4.44072	-4.32923	-4.31652	-4.22492		203	-12.9437	-12.4397	-12.3069	-11.788	-10.0741	-9.70737	-9.27787	-9.06215	-8.91384	-9.03476		203	-19.7618	-19.666	-19.5624	-19.4771	-19.5188	-19.1833	-19.6676	-19.2679	-18.8936
226	-8.96449	-8.86894	-8.81746	-8.69464	-8.622	-8.52746	-8.29198	-8.25401	-8.08375	-7.83539	-6.69949	-3.64663		236	-4.80513	-4.83775	-4.85244	-4.89019	-4.84424	-4.7651	-4.83039	-4.68892	-4.65721	-4.55405		202	-12.2294	-11.7044	-11.6371	-11.1891	-9.46094	-9.19278	-8.75961	-8.62427	-8.54899	-8.7139		202	-18.0026	-18.2537	-18.3395	-18.197	-18.399	-18.199	-18.9519	-18.5668	-18.4037
225.5	-9.18395	-9.07544	-8.99992	-8.90006	-8.8522	-8.69892	-8.4269	-8.37421	-8.24902	-8.06089	-6.87722	-3.69505		235.5	-5.29871	-5.33025	-5.33059	-5.32382	-5.28266	-5.17257	-5.2054	-5.06168	-4.98741	-4.88079		201	-11.1299	-10.6906	-10.6324	-10.2184	-8.60758	-8.40135	-8.02917	-7.96358	-7.96794	-8.17278		201	-15.6185	-16.1999	-16.479	-16.346	-16.7038	-16.7269	-17.6625	-17.3106	-17.3917
225	-9.40911	-9.24698	-9.21127	-9.09702	-9.05512	-8.87038	-8.6379	-8.48324	-8.42079	-8.27408	-6.98749	-3.65521		235	-5.81768	-5.85623	-5.88284	-5.81917	-5.74766	-5.63741	-5.61854	-5.46798	-5.37645	-5.23973		200	-9.65284	-9.37108	-9.25701	-8.85557	-7.51578	-7.35451	-7.0834	-7.07936	-7.14253	-7.40129		200	-12.5934	-13.4027	-13.8593	-13.8921	-14.4118	-14.6758	-15.7159	-15.4354	-15.7701
224.5	-9.5958	-9.42583	-9.38157	-9.27968	-9.1695	-9.06361	-8.81271	-8.59844	-8.5456	-8.42373	-7.0718	-3.69924		234.5	-6.37093	-6.42235	-6.45459	-6.3314	-6.25354	-6.14578	-6.05868	-5.8859	-5.7925	-5.61681		199	-7.85893	-7.7317	-7.52291	-7.15464	-6.19187	-6.10669	-5.92824	-5.97607	-6.07825	-6.43352		199	-8.97246	-9.89736	-10.4866	-10.843	-11.5373	-12.0119	-13.1134	-13.0032	-13.5771
224	-9.78476	-9.55444	-9.54842	-9.43752	-9.26831	-9.19223	-8.89652	-8.72467	-8.69118	-8.50958	-7.19099	-3.72374		234	-6.97712	-7.02435	-7.00328	-6.89201	-6.80571	-6.64099	-6.54507	-6.33503	-6.23751	-5.99799		198	-5.80475	-5.82012	-5.50415	-5.22459	-4.68167	-4.69639	-4.58589	-4.68212	-4.84731	-5.30833		198	-4.82909	-5.862	-6.52079	-7.24421	-8.12196	-8.82226	-9.93596	-10.1658	-10.9805
223.5	-9.90441	-9.7439	-9.68323	-9.56529	-9.32239	-9.33731	-8.96525	-8.84017	-8.74206	-8.58339	-7.29465	-3.77517		233.5	-7.6565	-7.64483	-7.58184	-7.46925	-7.36177	-7.17076	-7.02809	-6.78944	-6.66265	-6.43049		197	-3.51391	-3.73634	-3.32165	-3.20258	-3.08261	-3.14355	-3.08114	-3.28399	-3.58341	-4.02429		197	-0.21154	-1.52818	-2.18756	-3.14743	-4.24033	-5.28201	-6.32291	-7.05859	-8.23126
223	-9.95584	-9.88917	-9.75046	-9.67144	-9.41085	-9.36085	-9.05259	-8.9749	-8.75599	-8.62127	-7.39672	-3.86763		233	-8.36221	-8.31036	-8.22095	-8.07701	-7.96061	-7.70908	-7.4849	-7.28048	-7.07821	-6.83641		196	-1.01585	-1.57314	-1.0977	-1.20715	-1.49477	-1.47762	-1.43758	-1.89439	-2.40802	-2.56355		196	4.83156	2.92485	2.3337	1.36622	-0.00772	-1.55682	-2.43626	-3.75509	-5.55892
222.5	-10.0251	-9.97871	-9.80946	-9.72875	-9.48073	-9.44696	-9.13686	-9.0389	-8.78279	-8.66604	-7.42649	-3.91244		232.5	-9.0704	-8.96493	-8.85843	-8.69633	-8.5468	-8.28219	-8.02257	-7.75143	-7.52603	-7.25883		195	1.6083	0.617135	1.1084	0.728464	0.0495565	0.250586	0.294798	-0.557489	-1.3343	-0.971702		195	10.1507	7.40859	6.93425	6.12832	4.4164	2.2448	1.57555	-0.329104	-3.02283
222	-10.0163	-9.97744	-9.8275	-9.78091	-9.59493	-9.49877	-9.22713	-9.09547	-8.85937	-8.70923	-7.45095	-4.03167		232	-9.79962	-9.68563	-9.55372	-9.34794	-9.15375	-8.85671	-8.58425	-8.26044	-8.0018	-7.68128
221.5	-10.038	-9.97798	-9.88911	-9.85398	-9.64204	-9.53923	-9.24252	-9.08324	-8.92675	-8.79104	-7.4828	-3.9962		231.5	-10.5436	-10.3866	-10.2662	-10.0239	-9.81352	-9.44447	-9.14112	-8.76842	-8.44545	-8.08439
221	-10.0413	-9.97129	-9.86265	-9.85187	-9.67958	-9.61973	-9.2119	-9.0814	-9.00733	-8.81773	-7.48668	-4.08105		231	-11.3441	-11.0917	-10.9513	-10.688	-10.4433	-10.0093	-9.70685	-9.29787	-8.89108	-8.5205
220.5	-10.0912	-9.94436	-9.8855	-9.86829	-9.69343	-9.63488	-9.20932	-9.13517	-8.98445	-8.81243	-7.43792	-4.11809		230.5	-12.1035	-11.8123	-11.6606	-11.3497	-11.0498	-10.6048	-10.2272	-9.79741	-9.33552	-8.94315
220	-10.1184	-9.89575	-9.862	-9.80729	-9.7035	-9.68515	-9.23548	-9.1764	-8.96183	-8.75854	-7.47245	-4.01617		230	-12.8457	-12.5671	-12.3664	-11.9866	-11.6411	-11.2004	-10.7619	-10.303	-9.81248	-9.32591
219.5	-10.1325	-9.83767	-9.90969	-9.76683	-9.69346	-9.65765	-9.24636	-9.1694	-8.96218	-8.78112	-7.55045	-3.98205		229.5	-13.581	-13.2781	-13.0475	-12.5923	-12.2419	-11.7323	-11.3011	-10.8216	-10.2996	-9.72642
219	-10.0567	-9.82198	-9.91092	-9.76918	-9.61923	-9.61561	-9.33602	-9.15197	-8.96095	-8.79662	-7.63249	-3.96317		229	-14.2912	-14.0138	-13.747	-13.2169	-12.879	-12.2611	-11.8041	-11.309	-10.7504	-10.1353
218.5	-10.0432	-9.85359	-9.90461	-9.79218	-9.57731	-9.5465	-9.35317	-9.10055	-9.05387	-8.77739	-7.69857	-4.02867		228.5	-15.0285	-14.7221	-14.394	-13.8433	-13.464	-12.8125	-12.2893	-11.7454	-11.1565	-10.5437
218	-10.0353	-9.91609	-9.77931	-9.83025	-9.5795	-9.58173	-9.31909	-9.08486	-9.07687	-8.73189	-7.62915	-4.17286		228	-15.7433	-15.4319	-15.0104	-14.4366	-13.9992	-13.3356	-12.7318	-12.1784	-11.5854	-10.9343
217.5	-10.0311	-9.89252	-9.73377	-9.83129	-9.52862	-9.61423	-9.30521	-9.11497	-9.05475	-8.77354	-7.62299	-4.3519		227.5	-16.4127	-16.1176	-15.6565	-15.0204	-14.5435	-13.8094	-13.1427	-12.6167	-11.9805	-11.3131
217	-10.0108	-9.89656	-9.67738	-9.84591	-9.54104	-9.59846	-9.29459	-9.11521	-9.03122	-8.83539	-7.62145	-4.44517		227	-17.0574	-16.7556	-16.2414	-15.5785	-15.0825	-14.2661	-13.5869	-13.0259	-12.3585	-11.6407
216.5	-9.96161	-9.83706	-9.75092	-9.80768	-9.52577	-9.52877	-9.2809	-9.10682	-9.06449	-8.93785	-7.60595	-4.39332		226.5	-17.6392	-17.3442	-16.7416	-16.0959	-15.6011	-14.6928	-14.0144	-13.4144	-12.676	-11.928
216	-9.97157	-9.81183	-9.7645	-9.78429	-9.61373	-9.45538	-9.26909	-9.05478	-9.06379	-8.98566	-7.64145	-4.35894		226	-18.1925	-17.8875	-17.2313	-16.6164	-16.0419	-15.138	-14.4095	-13.7465	-12.9977	-12.1927
215.5	-9.95215	-9.84567	-9.79704	-9.76087	-9.6842	-9.44069	-9.26717	-9.00559	-9.08441	-8.98412	-7.67592	-4.35859		225.5	-18.722	-18.372	-17.6776	-17.0493	-16.4455	-15.5465	-14.7386	-14.0965	-13.3119	-12.4392
215	-9.92426	-9.83398	-9.79319	-9.74314	-9.70219	-9.51588	-9.31463	-9.0224	-9.06149	-9.02847	-7.70284	-4.57428		225	-19.1626	-18.8032	-18.1099	-17.4081	-16.808	-15.9035	-15.0741	-14.3853	-13.6004	-12.6775
214.5	-9.97257	-9.88436	-9.80442	-9.74118	-9.69543	-9.55635	-9.36029	-9.06005	-9.04868	-8.94958	-7.82372	-4.59109		224.5	-19.5441	-19.2045	-18.4687	-17.7561	-17.1367	-16.2067	-15.3839	-14.6137	-13.8576	-12.8808
214	-9.9893	-9.94917	-9.81438	-9.8171	-9.66208	-9.71673	-9.39859	-9.2034	-9.10972	-9.00289	-7.85403	-4.55551		224	-19.8795	-19.5016	-18.7742	-18.0444	-17.4251	-16.4817	-15.674	-14.7997	-14.1051	-13.089
213.5	-10.1083	-10.0059	-9.93846	-9.90444	-9.77493	-9.83027	-9.49898	-9.38505	-9.18956	-9.0137	-7.89015	-4.57955		223.5	-20.1792	-19.7599	-19.04	-18.2922	-17.6557	-16.6998	-15.8781	-14.9587	-14.2651	-13.2613
213	-10.2838	-10.0444	-10.0576	-10.0683	-9.95123	-9.95796	-9.68113	-9.55328	-9.23895	-9.11466	-7.95618	-4.63274		223	-20.4293	-20.0185	-19.3011	-18.5264	-17.8338	-16.8978	-16.0143	-15.1048	-14.436	-13.4331
212.5	-10.3931	-10.1149	-10.2135	-10.1452	-10.1655	-10.0753	-9.82075	-9.73651	-9.40799	-9.319	-8.11126	-4.79717		222.5	-20.644	-20.2034	-19.4747	-18.7079	-18.0156	-17.034	-16.1391	-15.2347	-14.5594	-13.5945
212	-10.5553	-10.23	-10.3725	-10.2947	-10.3474	-10.1238	-10.0566	-9.95013	-9.48929	-9.61604	-8.4073	-4.89067		222	-20.8115	-20.3086	-19.6208	-18.8451	-18.1556	-17.1278	-16.2868	-15.3295	-14.6648	-13.7175
211.5	-10.7155	-10.4796	-10.5546	-10.479	-10.542	-10.2764	-10.2476	-10.0986	-9.67687	-9.82885	-8.60384	-5.00255		221.5	-20.9003	-20.3896	-19.7076	-18.9663	-18.2798	-17.1869	-16.3626	-15.403	-14.7278	-13.761
211	-10.9359	-10.778	-10.8351	-10.73	-10.611	-10.4759	-10.4325	-10.2638	-9.84956	-10.0064	-8.79484	-5.26963		221	-20.9424	-20.3939	-19.7562	-19.0218	-18.3541	-17.2212	-16.4352	-15.4741	-14.7144	-13.8112
210.5	-11.2413	-11.084	-11.1153	-11.0306	-10.8178	-10.7973	-10.6882	-10.4907	-10.1539	-10.1275	-8.93168	-5.36255		220.5	-20.9628	-20.3852	-19.7933	-19.0776	-18.383	-17.2653	-16.4123	-15.5011	-14.7086	-13.8144
210	-11.4445	-11.3575	-11.3513	-11.2778	-11.0754	-11.1281	-10.9112	-10.821	-10.4815	-10.3172	-9.20515	-5.62297		220	-20.9105	-20.352	-19.8043	-19.0741	-18.3868	-17.277	-16.4287	-15.5335	-14.73	-13.8333
209.5	-11.7147	-11.6369	-11.6217	-11.5909	-11.3565	-11.4409	-11.1367	-11.1817	-10.7856	-10.6727	-9.45738	-5.88209		219.5	-20.8915	-20.2731	-19.7657	-19.0316	-18.3483	-17.2467	-16.4505	-15.52	-14.7517	-13.827
209	-11.9587	-11.9176	-11.8568	-11.9194	-11.692	-11.6493	-11.3867	-11.3005	-11.0986	-10.871	-9.73311	-6.18547		219	-20.8138	-20.231	-19.7296	-18.9525	-18.2512	-17.2068	-16.4573	-15.4877	-14.757	-13.796
208.5	-12.2122	-12.2645	-12.0963	-12.092	-11.924	-11.8213	-11.6442	-11.4709	-11.3382	-11.1118	-9.86861	-6.63667		218.5	-20.749	-20.1751	-19.6576	-18.9246	-18.1365	-17.207	-16.4102	-15.5099	-14.7549	-13.7823
208	-12.4618	-12.4978	-12.3755	-12.2922	-12.109	-12.0091	-11.8464	-11.5558	-11.5113	-11.2493	-10.0015	-6.93236		218	-20.6371	-20.0889	-19.6086	-18.8683	-17.9862	-17.1312	-16.3592	-15.5415	-14.7606	-13.7942
207.5	-12.4768	-12.5801	-12.4022	-12.2989	-12.2338	-12.1725	-11.9729	-11.7142	-11.5723	-11.407	-10.0647	-7.23063		217.5	-20.5139	-20.0061	-19.5762	-18.7844	-17.8813	-17.0448	-16.2885	-15.5783	-14.7597	-13.8227
207	-12.4893	-12.5221	-12.3931	-12.3678	-12.1979	-12.2141	-11.9299	-11.8445	-11.6109	-11.4545	-10.2223	-7.44597		217	-20.4288	-19.9592	-19.4729	-18.7275	-17.7906	-16.9679	-16.2907	-15.5644	-14.7527	-13.8339
206.5	-12.3879	-12.4121	-12.2704	-12.3229	-12.1118	-12.2047	-11.8006	-11.7599	-11.5571	-11.3852	-10.3644	-7.62928		216.5	-20.3727	-19.9187	-19.3955	-18.6401	-17.7299	-16.9018	-16.3119	-15.5578	-14.7906	-13.8634
206	-12.4038	-12.2542	-12.141	-12.2415	-11.9457	-12.0947	-11.6651	-11.5126	-11.466	-11.2804	-10.3741	-7.74694		216	-20.2451	-19.8917	-19.3758	-18.569	-17.7087	-16.8626	-16.2906	-15.5139	-14.8133	-13.8626
205.5	-12.3162	-11.9817	-11.9594	-12.0594	-11.7422	-11.8907	-11.421	-11.2469	-11.129	-11.0421	-10.308	-7.97251		215.5	-20.1773	-19.8599	-19.342	-18.569	-17.7462	-16.8564	-16.3047	-15.5585	-14.8274	-13.8777
205	-12.0536	-11.7914	-11.7257	-11.6842	-11.4591	-11.5391	-11.1288	-10.8835	-10.7963	-10.8308	-10.0495	-8.23009		215	-20.1151	-19.8468	-19.3135	-18.5617	-17.8529	-16.831	-16.3958	-15.5853	-14.8689	-13.9192
204.5	-11.6111	-11.4209	-11.335	-11.1914	-11.0928	-11.218	-10.7966	-10.6114	-10.4393	-10.5935	-9.89415	-8.2534		214.5	-20.1603	-19.8643	-19.3195	-18.5728	-17.9392	-16.8869	-16.424	-15.6533	-14.9329	-13.975
204	-11.1038	-10.9569	-10.8334	-10.7113	-10.7418	-10.8132	-10.4134	-10.2501	-10.1777	-10.3855	-9.63161	-8.15847		214	-20.2087	-19.9256	-19.3736	-18.6691	-18.1046	-17.0489	-16.5295	-15.7876	-15.0931	-14.0514
203.5	-10.6068	-10.5761	-10.2367	-10.1853	-10.2909	-10.3218	-9.88175	-9.77751	-9.86756	-10.1682	-9.43615	-8.2979		213.5	-20.2876	-19.9966	-19.4945	-18.8466	-18.2958	-17.2027	-16.6735	-15.9846	-15.2743	-14.2098
203	-10.123	-10.0237	-9.69084	-9.67614	-9.82246	-9.77123	-9.38317	-9.09082	-9.30175	-9.71635	-9.09222	-8.23936		213	-20.4665	-20.1503	-19.689	-19.0448	-18.4987	-17.4779	-16.9002	-16.2545	-15.4733	-14.3985
202.5	-9.46968	-9.37848	-9.11238	-9.10691	-9.07289	-9.02515	-8.61167	-8.52371	-8.53472	-9.04154	-8.49326	-8.71778		212.5	-20.737	-20.3538	-19.9226	-19.293	-18.7943	-17.7995	-17.2113	-16.5938	-15.7267	-14.6992
202	-8.86815	-8.69759	-8.49061	-8.35856	-8.36258	-8.11581	-7.95194	-7.88263	-7.76045	-8.15504	-7.91553	-8.47947		212	-21.0582	-20.6296	-20.2484	-19.6016	-19.0934	-18.192	-17.508	-16.9139	-16.0583	-15.0574
201.5	-8.10499	-7.78106	-7.79165	-7.74214	-7.50227	-7.33919	-7.14748	-7.06786	-6.89087	-7.08404	-7.38034			211.5	-21.5081	-21.0708	-20.681	-20.0369	-19.424	-18.6432	-17.8495	-17.316	-16.4396	-15.4514
201	-7.25715	-6.82398	-6.68596	-6.78325	-6.67212	-6.46454	-6.22198	-6.18636	-6.15229	-6.01473	-6.87318			211	-22.0295	-21.5482	-21.1257	-20.5553	-19.8971	-19.1306	-18.3232	-17.7298	-16.8783	-15.9573
200.5	-6.18772	-5.79448	-5.47088	-5.69764	-5.82054	-5.36258	-5.57079	-4.74582	-5.14614	-4.69127	-6.37811			210.5	-22.6234	-22.0991	-21.6986	-21.0664	-20.3462	-19.6105	-18.8562	-18.2791	-17.308	-16.5057
200	-4.92199	-4.54283	-4.31992	-4.74468	-4.60927	-3.98731	-4.4874	-3.89251	-4.01545	-3.76539	-5.53726			210	-23.2363	-22.7294	-22.2962	-21.6455	-20.9129	-20.2589	-19.4222	-18.8016	-17.83	-17.0125
199.5	-3.50034	-3.41186	-3.3307	-3.32826	-3.38639	-2.95706	-3.50482	-2.77227	-2.63473	-2.89395	-4.66426			209.5	-23.8299	-23.3335	-22.9041	-22.2557	-21.5633	-20.8211	-20.0428	-19.4041	-18.4138	-17.6225
199	-2.20714	-2.1636	-2.29306	-2.09171	-1.77851	-1.60431	-2.26229	-1.57346	-1.25269	-2.06614	-3.56722			209	-24.46	-23.9503	-23.5624	-22.9134	-22.2294	-21.4182	-20.6002	-20.0048	-19.0584	-18.2616
198.5	-0.752126	-1.01571	-1.02148	-0.321845	-0.310714	-0.442476	-0.69924	-0.215705	-0.0925469	-0.351108	-2.35803			208.5	-25.0876	-24.5722	-24.2153	-23.5785	-22.9759	-22.0284	-21.2853	-20.6342	-19.7059	-18.876
198	0.608255	0.657175	0.702648	1.19574	1.17423	0.850382	0.92183	1.39751	1.07888	1.2792	-0.884808			208	-25.6868	-25.2203	-24.8527	-24.1964	-23.6238	-22.617	-21.9596	-21.3214	-20.3478	-19.5495
197.5	2.461	2.56439	2.4393	2.55156										207.5	-26.2606	-25.921	-25.4511	-24.6634	-24.1985	-23.1474	-22.5797	-21.8772	-21.0618	-20.0214
197	4.25266	4.27994	4.06744	3.95981										207	-26.7264	-26.4262	-25.9281	-25.2424	-24.7278	-23.5716	-23.1694	-22.4321	-21.635	-20.5478
196.5	5.61293	5.69241	5.40827	5.35644										206.5	-27.1062	-26.8704	-26.3466	-25.6307	-25.262	-23.9105	-23.6736	-22.9901	-22.0826	-21.1373
196	7.38151	6.66656	6.80789	6.79406										206	-27.3709	-27.1443	-26.6675	-25.9672	-25.5687	-24.2673	-24.1405	-23.3242	-22.4421	-21.642
														205.5	-27.547	-27.2704	-26.8421	-26.0903	-25.7166	-24.3747	-24.5724	-23.6531	-22.7869	-22.1381
														205	-27.4405	-27.2599	-26.8004	-26.2094	-25.7437	-24.4336	-24.7512	-23.9809	-23.1545	-22.5692
														204.5	-27.2978	-27.0907	-26.6445	-26.0719	-25.6838	-24.5005	-24.7101	-24.0785	-23.4252	-22.8334
														204	-26.9904	-26.7074	-26.4223	-25.8697	-25.5113	-24.4585	-24.6873	-24.1141	-23.4365	-23.0934
														203.5	-26.6277	-26.2345	-25.898	-25.5042	-25.2309	-24.4553	-24.3849	-23.9487	-23.2633	-23.2115
														203	-26.0259	-25.4506	-25.299	-25.2309	-24.6355	-24.2136	-24.0938	-23.6998	-23.1987	-23.2123
														202.5	-25.2689	-24.7122	-24.674	-24.6103	-24.1921	-23.7099	-23.494	-23.3537	-23.0145	-22.8488
														202	-24.5037	-23.7765	-23.7564	-23.6679	-23.4721	-23.1304	-22.8511	-22.8297	-22.6156	-22.5216
														201.5	-23.5038	-22.7372	-22.771	-22.6911	-22.4875	-22.483	-22.0962	-22.0165	-21.8902	-22.0723
														201	-22.2743	-21.49	-21.3939	-21.695	-21.3591	-21.4228	-21.4801	-21.3948	-21.1395	-21.3901
														200.5	-20.5762	-19.9715	-19.9805	-20.3776	-19.9885	-20.2599	-20.2606	-20.4849	-20.4119	-20.6188
														200	-18.5599	-18.169	-18.7022	-18.7439	-18.3411	-18.5611	-19.0894	-19.1496	-19.1998	-19.4777
														199.5	-16.8745	-16.3909	-16.9548	-16.8069	-16.503	-17.0381	-17.7578	-17.5115	-17.9315	-18.1785
														199	-14.5033	-14.0654	-14.5737	-14.5735	-14.5345	-15.1514	-16.5361	-15.8428	-16.4815	-16.6689
														198.5	-12.1737	-11.5117	-12.3911	-12.6288	-12.0067	-13.0362	-14.7653	-14.3212	-15.1283	-14.9935
														198	-9.53416	-8.58739	-9.59708	-10.57	-9.70136	-10.6658	-12.5547	-12.2612	-13.8388	-12.8971
														197.5	-6.79632	-5.67004	-7.0556	-8.06185	-7.25969	-8.45269	-9.97155	-10.1463	-12.2303	-11.3651
														197	-3.73919	-2.6437	-4.12015	-5.63408	-5.15459	-6.13941	-7.85567	-8.01165	-10.1728	-9.43123
														196.5	-0.792256	0.29521	-0.558632	-2.64515	-3.31489	-3.54977	-5.38271	-5.60616	-8.47077	-7.93104
														196	2.62576	3.69038	2.24629	0.426359	-1.05421	-1.03109	-2.83087	-3.65385	-6.68271	-6.82503
														195.5	5.56198	5.92661	5.40913	3.32293	1.68779	0.656726	-0.793471	-2.32955	-4.65662	-5.40286
														195	9.2681	7.90154	7.70218	6.67868	3.89035	3.25182	1.48563	-0.1871	-2.80695	-3.709
