# Supplementary material for: Multivalency, autoinhibition, and protein disorder in the regulation of interactions of dynein intermediate chain with dynactin and the nuclear distribution protein
Source: eLife journal article supplement (doi:10.7554/elife.80217), 2022-11-23
Supplement: fig3-figsupp1-data1 [file Figure 3- figure supplement 1-source data 1.xlsx]

## Sheet: Helix Prediction
Thanks for using AGADIR
http://agadir.crg.es
Copyright @1997-2002, Lacroix E., Munoz V., Petukhov M. & Serrano, L.
pH 7.5
Temperature 298
Ionic Strength
Nterm free
Cterm free
Human				Dros.				Rat				Yeast				C. elegans				Zebrafish				Shark				Octopus				CT
res	aa	Hel		res	aa	Hel		res	aa	Hel		res	aa	Hel		res	aa	Hel		res	aa	Hel		res	aa	Hel		res	aa	Hel		res	aa	Hel
0		0		0	M	0		0	M	0		1	M	0		0	M	0		0	M	0		0	M	0		0	M	0		1	M	0
1	M	0		1		0		1		0		1		0		1		0		1		0		1		0		1		0		2	Q	0.1
2	S	0		2	D	2.1		2	S	0.1		2	E	2.6		2	S	0.3		2	A	0.2		2	S	0.2		2	S	0.3		3	A	0.3
3	D	1.2		3	R	32.7		3	D	2.8		3	R	7.3		3	E	14.3		3	D	0.4		3	D	20.2		3	D	9.4		4	R	2.1
4	K	4.5		4	K	40.5		4	K	9.7		4	L	11.1		4	L	22.6		4	R	10.8		4	K	23.7		4	R	48		5	R	10.9
5	S	8		5	A	43.3		5	S	17.1		5	K	13.6		5	R	24.5		5	S	13.8		5	D	23.9		5	K	54.7		6	E	14.9
6	D	13.9		6	E	44.8		6	E	27		6	Q	14.4		6	K	30.4		6	D	18.6		6	K	41.2		6	A	57.1		7	E	16.4
7	L	56.1		7	L	46.7		7	L	40.6		7	L	17.1		7	L	31		7	L	57.9		7	S	44.5		7	E	58.3		8	L	20.4
8	K	62.9		8	E	49.6		8	K	49.6		8	E	23.1		8	E	31.8		8	K	64.2		8	E	53		8	L	59.7		9	L	25.4
9	A	65.7		9	R	55.7		9	A	53.3		9	E	33.3		9	L	33.8		9	A	66.9		9	L	64.5		9	E	61.3		10	A	27.6
10	E	67.3		10	K	54.2		10	E	55.4		10	K	36.6		10	E	34.4		10	E	68.3		10	K	70.8		10	R	66.3		11	K	27.9
11	L	68.5		11	K	52.2		11	L	57		11	R	37		11	R	33		11	L	69.4		11	A	73.5		11	K	65		12	K	26.5
12	E	70.1		12	A	51.2		12	E	59.1		12	R	37.2		12	K	30.6		12	E	70.8		12	E	75		12	K	63.1		13	A	25.9
13	R	71.9		13	K	49.7		13	R	61.5		13	Q	33.9		13	K	27.2		13	R	71.7		13	L	76.1		13	A	62.1		14	R	25.1
14	K	71.5		14	L	49.7		14	K	61.1		14	L	33	aa	14	Q	23.3		14	K	70.8		14	E	77.6		14	R	61.5		15	L	26.1
15	K	70.7		15	A	49.5		15	K	60.3		15	K	32.8		15	K	21.7		15	K	69.4		15	R	78.8		15	L	63.1		16	A	26.2
16	Q	69.8		16	A	48.1		16	Q	59.2		16	E	32	M	16	L	21.6		16	Q	67.6		16	K	78.1		16	E	63.1		17	E	24.8
17	R	69.5		17	L	47.1		17	R	58.9		17	L	30.9	S	17	A	21.6		17	R	67		17	K	77		17	Q	61.5		18	I	25.7
18	L	70.2		18	R	48.2		18	L	59.7		18	R	29.6	D	18	E	19.6		18	L	67.4		18	Q	75.8		18	M	58.8		19	K	22.7
19	A	70.7		19	E	47.2		19	A	60.4		19	E	27.2	K	19	L	17		19	A	67.7		19	R	75.4		19	R	58.2		20	R	19.4
20	Q	70.3		20	E	45.3		20	Q	59.6		20	R	19.3	S	20	K	13.7		20	Q	66.1		20	L	76		20	K	56.1		21	Q	12
21	I	70.7		21	K	45.1		21	I	60.2		21	R	13.7	D	21	S	11.1		21	I	66.5		21	A	76.5		21	E	48.1		22	R	11.6
22	R	72.8		22	D	45.2		22	R	62.8		22	K	10.1	L	22	Q	11.2		22	R	68.1		22	Q	76.3		22	R	46.3		23	E	10.6
23	E	75.9		23	R	45.2		23	E	66.6		23	Q	6	K	23	R	10		23	E	70.6		23	I	76.8		23	Q	42.8		24	L	8.1
24	E	79.2		24	R	42.1		24	E	70.1		24	A	4.6	A	24	K	9.8		24	E	71		24	R	79.1		24	E	41.9		25	R	6.9
25	K	82.8		25	R	40.2		25	K	74.6		25	S	2.8	E	25	R	10.1		25	K	73.8		25	E	82.7		25	K	41.7		26	A	6.7
26	K	82.9		26	R	36.6		26	K	74.6		26	L	2.1	L	26	E	10.5		26	K	73.5		26	E	87.3		26	E	41.1		27	Q	4.7
27	R	83.2		27	E	32.1		27	R	74.9		27	F	0	E	27	E	10.5		27	R	73.7		27	K	91.1		27	Q	34.8		28	Q	3.9
28	K	83.2		28	K	30.6		28	K	74.9		28	P	0	R	28	D	10.8		28	K	73.5		28	K	91.3		28	R	30.7		29	A	3.8
29	E	84.2		29	E	27.3		29	E	75.7		29	G	0	K	29	A	13.6		29	E	74.1		29	R	91.6		29	R	25.9		30	A	3.1
30	E	84.4		30	I	27.4		30	E	75.7		30	S	0.1	K	30	R	13.5		30	E	73.8		30	K	91.7		30	K	13.3		31	G	1.2
31	E	85		31	K	25.2		31	E	75.5		31	E	0.1	Q	31	V	13.4		31	E	72.7		31	E	92.6		31	L	7.8		32	R	0.1
32	R	84.4		32	D	24.4		32	R	73.3		32	T	0.1	R	32	Q	11.7		32	R	68.8		32	E	93		32	K	4.6		33	S	0
33	K	81.3		33	M	25.2		33	K	68		33	M	0.1	L	33	N	10.7		33	K	61.6		33	E	93.8		33	D	2.9		34	I	0
34	K	79.1		34	E	24.4		34	K	64.4		34	G	0	A	34	L	8.6		34	K	56.6		34	R	93.8		34	N	2.2		35	T	0
35	K	76.5		35	E	23.5		35	K	59.9		35	H	0	Q	35	L	7.1		35	K	50.4		35	K	92.2		35	E	1.7		36	P	0.2
36	E	74.5		36	A	22.4		36	E	56.6		36	H	0	I	36	R	2.6		36	E	45.8		36	R	91.2		36	E	0.4		37	S	0.2
37	A	72.8		37	A	20.7		37	T	56.5		37	P	0	R	37	S	0		37	S	40.2		37	K	88.1		37	V	0.4		38	E	0.2
38	D	65.6		38	G	3.7		38	D	52.1		38	T	0.1	E	38	T	0		38	E	32.3		38	E	85.9		38	K	0.1		39	L	0.2
39	M	52		39	R	0.5		39	Q	13.8		39	E	0.4	E	39	N	0		39	M	20.8		39	A	84		39	P	0.1		40	V	0.2
40	Q	37.4		40	I	0.4		40	K	9.2		40	V	0.4	K	40	E	0		40	L	14.8		40	D	70.9		40	G	0		41	S	0
41	Q	22.9		41	G	0.3		41	K	5.8		41	H	0.4	K	41	N	0		41	Q	7.4		41	Q	26.7		41	K	0		42	P	0
42	K	12.1		42	G	0.1		42	E	4.3		42	A	0.4	R	42	G	0		42	R	0		42	K	17.9		42	P	0		43	T	0
43	K	6		43	G	0		43	A	3.3		43	K	0.2	K	43	T	0		43	P	0		43	K	8.3		43	P	0		44	P	0.4
44	E	0		44	A	0		44	A	1.7		44	A	0.1	E	44	T	0		44	E	0		44	E	3.7		44	Q	0		45	S	0.4
45	P	0		45	G	0		45	V	1.4		45	T	0.1	E	45	Q	0		45	N	0		45	V	3.3		45	D	0		46	R	0.5
46	V	0		46	I	0.1		46	S	0		46	M	0	E	46	N	0		46	V	0		46	V	3		46	L	0.5		47	A	0.5
47	Q	0.1		47	D	0.1		47	V	0.4		47	V	0	R	47	G	0		47	T	0		47	Q	1.7		47	R	0.7		48	N	0.3
48	D	0.1		48	K	0.2		48	Q	0.7		48	S	0	K	48	T	0		48	E	0.5		48	N	0.9		48	A	0.8		49	S	0.1
49	D	1.4		49	D	0.2		49	E	0.8		49	V	0	K	49	S	0		49	D	0.7		49	E	4.4		49	E	0.9		50	R	0.6
50	S	6.1		50	Q	2.3		50	E	1.2		50	S	0	K	50	R	0.3		50	S	10.4		50	E	5.3		50	T	0.9		51	R	0.6
51	D	64.7		51	R	2.3		51	S	1.7		51	V	0.1	E	51	Q	0.3		51	D	71		51	L	7.2		51	D	2		52	E	0.6
52	L	71.9		52	K	2.3		52	D	80.6		52	Q	0.1	A	52	T	0.3		52	L	78.5		52	D	12.6		52	A	2.7		53	I	0.6
53	D	73.2		53	D	2.4		53	L	87		53	T	0.1	D	53	L	0.3		53	D	79.8		53	I	30.1		53	L	2.8		54	E	0.5
54	R	77		54	L	3		54	E	88		54	D	0.2	M	54	S	0.1		54	R	83.8		54	E	32.5		54	L	2.8		55	S	0.3
55	K	73.7		55	D	2.9		55	K	89.1		55	M	0.3	Q	55	S	1.1		55	K	80.4		55	K	34.3		55	Q	2.2		56	L	0.3
56	R	73		56	E	3.3		56	K	88		56	E	0.3	Q	56	N	1.8		56	R	79.7		56	K	33.6		56	D	1.4		57	I	0.3
57	R	71.8		57	M	3		57	R	87.7		57	E	0.4	K	57	E	8.6		57	R	78.4		57	R	33		57	L	1.3		58	D	0.2
58	E	67.4		58	L	2.9		58	R	87.3		58	G	0.2	K	58	V	10		58	E	73.6		58	R	32.4		58	G	0.1		59	S	0.3
59	T	67.2		59	S	2.4		59	E	84.6		59	S	0.2	E	59	E	11.1		59	T	73.4		59	E	30.8		59	I	0		60	I	0.3
60	E	64.9		60	S	1.2		60	A	83.4		60	K	0.2	P	60	D	12.2		60	E	70.8		60	A	30.3		60	P	0		61	L	0.3
61	A	59.6		61	L	1		61	E	78		61	I	0.2	V	61	I	13.6		61	A	65.1		61	D	27.9		61	P	0		62	S	0.2
62	L	55.1		62	G	0		62	A	71.2		62	Q	0.1	Q	62	L	13.6		62	L	60.3		62	A	26.4		62	N	0		63	S	0
63	L	48.8		63	V	0		63	L	61.3		63	E	0	D	63	R	13.4		63	L	53.4		63	L	23.4		63	E	0		64	S	0
64	Q	30.2		64	A	0		64	L	51.1		64	P	0.2	D	64	Q	7.3		64	Q	33.1		64	L	20.1		64	N	0		65	A	0
65	S	17.4		65	P	0		65	Q	29.9		65	Q	0.3	S	65	V	7.1		65	S	19		65	Q	13.3		65	S	0.1		66	G	0
66	I	17.2		66	V	0		66	S	15		66	S	0.4	D	66	G	0.3		66	I	18.8		66	S	6.8		66	G	0.1		67	A	0
67	G	0.5		67	S	0		67	M	9.4		67	A	1.4	L	67	I	0.3		67	G	0.6		67	M	4.3		67	R	0.1		68	N	0
68	I	0.3		68	E	0.2		68	G	1.7		68	Y	1.4	D	68	S	0		68	I	0.4		68	G	0		68	S	0.1		69	S	0
69	S	0		69	V	0.2		69	L	0		69	L	1.4	R	69	T	0		69	S	0		69	I	0		69	G	0.1		70	P	0.2
70	P	0		70	L	0.2		70	T	0		70	R	1.1	K	70	E	0		70	P	0		70	T	0		70	S	0		71	R	0.2
71	E	0		71	S	0.2		71	T	0		71	R	0.6	R	71	P	0		71	E	0		71	S	0		71	I	0		72	R	0.2
72	P	0		72	S	0.1		72	D	0		72	K	0.3	R	72	T	0		72	P	0		72	E	0		72	S	0		73	G	0.2
73	P	0		73	L	0.1		73	S	0		73	E	0.1	E	73	V	0		73	P	0		73	P	0		73	P	0		74	S	0
74	L	0		74	S	0		74	P	0		74	V	0.1	T	74	R	0		74	L	0		74	S	0		74	T	0		75	R	0
75	V	0		75	S	0		75	I	0		75	I	0	E	75	E	0		75	V	0		75	I	0		75	V	0		76	P	0
76	P	0		76	V	0		76	V	0		76	T	0.1	A	76	E	0		76	P	0		76	V	0		76	Q	0		77	N	0
77	T	0		77	N	0		77	P	0		77	Y	0	L	77	S	0		77	T	0		77	P	0		77	D	0		78	S	0
78	P	0		78	S	0.1		78	P	0		78	D	0	L	78	P	0		78	P	0		78	P	0		78	T	0		79	V	0
79	M	0		79	M	0.1		79	P	0		79	K	0	Q	79	A	0		79	M	0		79	T	0		79	E	0		80	I	0
80	S	0		80	T	0.1		80	M	0		80	G	0	S	80	P	0		80	S	0		80	S	0		80	Q	0		81	S	0
81	P	0		81	S	0.1		81	S	0		81	I	0.1	I	81	P	0		81	P	0		81	P	0		81	T	0		82	T	0
82	S	0		82	D	0		82	P	0		82	Q	0.1	G	82	P	0		82	S	0		82	S	0		82	N	0		83	G	0
83	S	0		83	N	0		83	S	0		83	T	0.1	I	83	G	0		83	S	0		83	S	0		83	V	0		84	E	0
84	K	0		84	S	0		84	S	0		84	D	0.1	S	84	S	0		84	Q	0		84	K	0		84	V	0		85	L	0
85	S	0		85	N	0		85	K	0		85	Q	0.3	P	85	H	0		85	S	0		85	S	0		85	I	0		86	S	0
86	V	0		86	T	0		86	S	0		86	I	0.4	E	86	S	0		86	V	0		86	V	0		86	S	0		87	T	0.1
87	S	0		87	Q	0		87	V	0		87	E	0.5	P	87	D	0		87	S	0		87	S	0		87	G	0		88	D	0.1
88	T	0		88	T	0		88	S	0		88	E	0.9	P	88	N	0		88	P	0		88	T	0		88	G	0		89	N	0.1
89	P	0		89	P	0.2		89	T	0		89	E	1	L	89	H	0		89	P	0		89	P	0.1		89	S	0		90	A	0.1
90	S	0		90	D	0.2		90	P	0		90	Q	1.5	V	90	V	0		90	S	0		90	S	0.1		90	T	0		91	S	0
91	E	0		91	A	0.6		91	S	0		91	L	1.5	P	91	D	0		91	E	0		91	E	0.1		91	R	0		92	E	0
92	A	0		92	S	0.6		92	E	0		92	Q	1.3	T	92	P	0.2		92	T	0		92	A	0.1		92	P	0		93	I	0
93	G	0		93	L	1.9		93	A	0		93	E	1.3	P	93	S	0.2		93	G	0		93	G	0		93	K	0		94	T	0
94	S	0		94	Q	1.9		94	G	0		94	N	0.8	M	94	A	0.2		94	S	0		94	S	0		94	V	0		95	A	0
95	Q	0		95	A	1.9		95	S	0		95	E	0.6	S	95	S	0.2		95	Q	0		95	Q	0.1		95	K	0		96	T	0
96	D	0		96	T	1.9		96	Q	0		96	N	0.2	P	96	H	0		96	E	0		96	D	0.1		96	L	0		97	T	0
97	S	0		97	V	1.9		97	D	0		97	H	0	S	97	P	0		97	S	0		97	S	0.1		97	S	0		98	T	0
98	G	0		98	N	0.7		98	S	0		98	T	0	S	98	R	0		98	I	0		98	A	0.1		98	I	0		99	G	0
99	D	0		99	G	0.5		99	G	0		99	T	0	K	99	I	0		99	D	0		99	D	0		99	C	0		100	Q	0
100	L	0		100	Q	0		100	D	0		100	T	0.1	S	100	S	0		100	G	0.1		100	G	0		100	K	0		101	L	0
101	G	0		101	S	0		101	G	0		101	D	0.1	V	101	N	0		101	G	0.1		101	T	0.1		101	V	0		102	P	0
102	P	0.3		102	G	0		102	A	0		102	A	0.2	S	102	L	0		102	T	0.1		102	L	1.1		102	S	0		103	S	0
103	L	0.3		103	G	0		103	V	0		103	V	0.2	T	103	L	0		103	V	0.1		103	G	1.1		103	E	0.2		104	Q	0
104	T	0.3		104	K	0		104	G	0		104	A	0.2	P	104	S	0		104	E	0.1		104	A	1.6		104	T	0.2		105	P	0
105	R	0.3		105	K	0		105	S	0		105	I	0.2	S	105	V	0.1		105	R	0.1		105	R	1.5		105	T	0.2		106	Q	0
106	T	0.3		106	Q	0		106	R	0		106	E	0	E	106	D	0		106	T	0.1		106	R	1.5		106	I	0.2		107	P	0
107	L	0.2		107	P	0		107	R	0		107	T	0.1	A	107	L	0.1		107	L	0.1		107	A	1.1		107	A	0		108	L	0
108	Q	0.1		108	L	0		108	G	0		108	T	0.2	G	108	E	0		108	Q	0		108	V	1		108	P	0		109	S	0
109	W	0		109	N	0		109	P	0		109	A	1	S	109	F	0		109	W	0		109	K	0.7		109	K	0		110	T	0
110	D	0		110	L	0		110	I	0		110	A	1	Q	110	S	0		110	D	0		110	L	0.6		110	E	0		111	V	0
111	T	0		111	S	0		111	K	0		111	D	1	D	111	S	0		111	T	0		111	G	0.2		111	N	0		112	P	0
112	D	0		112	V	0.1		112	L	0		112	E	1.1	S	112	V	0.2		112	D	0		112	M	0.2		112	V	0		113	L	0.1
113	P	0.1		113	Y	0.1		113	G	0		113	N	0.7	G	113	Q	0.2		113	P	0.9		113	A	0.2		113	S	0		114	Q	0.1
114	S	0.1		114	N	0		114	M	0		114	N	1.3	D	114	T	0.2		114	S	1		114	K	0.2		114	Y	0		115	T	0.1
115	V	0.1		115	V	0.1		115	A	0		115	K	1.5	L	115	A	0.2		115	A	1.1		115	I	0.2		115	S	0		116	V	0.1
116	L	0.1		116	Q	0		116	K	0		116	D	1.4	G	116	C	0.1		116	L	1.2		116	M	0.1		116	K	0		117	Y	0.1
117	Q	0.1		117	A	0		117	I	0		117	K	1.7	P	117	T	0.1		117	Q	1.1		117	Q	0		117	E	0		118	E	0.1
118	L	0		118	T	0		118	T	0		118	A	1.6	L	118	D	0.1		118	L	1.1		118	V	0		118	T	0		119	C	0
119	Q	0		119	N	0		119	Q	0		119	E	1.2	T	119	N	0		119	L	1		119	D	0		119	Q	0		120	P	0
120	S	0		120	I	0		120	V	0		120	N	1	R	120	K	0.3		120	A	1		120	F	0		120	T	0		121	P	0
121	D	0.2		121	P	0		121	D	0		121	D	0.8	T	121	D	0.3		121	D	0.2		121	P	0		121	T	0		122	S	0
122	S	0.5		122	P	0		122	F	0		122	Q	0.3	L	122	S	0.4		122	S	0		122	P	0		122	S	0		123	P	0.2
123	E	6.5		123	K	0		123	P	0		123	P	0.4	Q	123	A	0.5		123	V	0		123	R	0		123	V	0		124	V	0.2
124	L	6.7		124	E	0		124	P	0		124	R	0.5	W	124	I	0.5		124	H	0		124	E	0		124	E	0		125	K	0.2
125	G	6.6		125	T	0		125	R	0		125	L	0.7	D	125	Y	0.3		125	G	0		125	I	0		125	T	0		126	E	0.2
126	R	6.5		126	L	0.1		126	E	0		126	E	0.6	T	126	S	0.2		126	C	0.1		126	V	0		126	G	0		127	I	0.2
127	R	6		127	V	0.1		127	I	0		127	L	0.6	D	127	K	0		127	R	0.2		127	T	0		127	D	0.1		128	I	0.2
128	L	5.9		128	Y	0.1		128	V	0		128	A	0.5	P	128	G	0		128	M	0.2		128	Y	0		128	R	0.1		129	S	0.2
129	H	3.4		129	T	0.1		129	T	0		129	K	0	S	129	T	0		129	Q	0.2		129	T	0		129	E	0.1		130	Y	0
130	K	2.1		130	K	0		130	Y	0		130	P	0	V	130	Q	0		130	R	0.2		130	K	0		130	G	0.1		131	S	0
131	L	1.6		131	Q	0		131	T	0		131	F	0	L	131	T	0		131	L	0.2		131	E	0		131	S	0		132	K	0
132	G	0.3		132	T	0		132	K	0		132	L	0	Q	132	D	0.1		132	G	0.1		132	T	0		132	S	0		133	G	0
133	V	0.2		133	Q	0		133	E	0		133	V	0.1	L	133	D	0.3		133	A	0		133	Q	0		133	P	0		134	V	0
134	S	0		134	T	0		134	T	0		134	E	0.6	Q	134	E	0.7		134	S	0		134	T	0		134	R	0		135	Q	0
135	K	0		135	T	0		135	Q	0		135	E	0.9	S	135	R	0.7		135	K	0		135	P	0.2		135	F	0		136	T	0
136	V	0		136	S	0		136	T	0		136	A	1.3	D	136	I	0.7		136	I	0		136	V	0.2		136	D	0		137	T	0
137	T	0		137	T	0		137	P	0.1		137	A	1.4	S	137	S	0.5		137	V	0		137	A	0.2		137	S	0		138	E	0
138	Q	0		138	G	0		138	V	0.1		138	A	1.3	E	138	V	0.5		138	Q	0		138	A	0.2		138	S	0		139	E	0
139	V	0		139	G	0		139	T	0.1		139	T	1.2	L	139	G	0.1		139	I	0		139	Q	0		139	R	0		140	W	0
140	D	0		140	G	0		140	A	0.1		140	L	1	G	140	E	0.1		140	D	0		140	T	0		140	I	0		141	T	0
141	F	0		141	N	0		141	Q	0		141	S	0.5	R	141	F	0		141	F	0		141	T	0		141	G	0		142	P	0.1
142	L	0		142	G	0		142	P	0		142	N	0.3	R	142	S	0		142	M	0		142	E	0		142	S	0		143	R	0.1
143	P	0		143	D	0		143	K	0		143	A	0.3	L	143	L	0		143	P	0		143	E	0		143	P	0.1		144	K	0.1
144	R	0		144	V	0		144	E	0		144	S	0.2	H	144	G	0		144	K	0		144	E	0		144	K	0.1		145	S	0.1
145	E	0		145	L	0		145	D	0		145	F	0.3	K	145	S	0		145	E	0		145	N	0		145	F	0.1		146	R	0
146	V	0		146	S	0		146	E	0		146	A	0.2	L	146	Q	0		146	L	0		146	E	0		146	V	0.1		147	G	0
147	V	0		147	C	0		147	E	0		147	R	0.2	G	147	E	0		147	V	0		147	E	0		147	Y	0		148	V	0
148	S	0		148	H	0		148	E	0		148	L	0.2	V	148	F	0		148	T	0		148	Q	0		148	P	0		149	G	0
149	Y	0		149	S	0		149	E	0		149	E	0.2	S	149	D	0		149	Y	0		149	E	0.1		149	N	0		150	D	0
150	S	0		150	S	0		150	D	0		150	T	0.2	K	150	Y	0		150	S	0		150	E	0.1		150	L	0		151	S	0
151	K	0		151	P	0		151	D	0		151	E	0.4	V	151	D	0		151	K	0		151	I	0.1		151	E	0		152	D	0
152	E	0		152	L	0		152	V	0		152	V	0.4	T	152	D	0.1		152	E	0		152	A	0.1		152	W	0		153	D	0.1
153	T	0		153	S	0		153	A	0		153	S	0.3	Q	153	D	0.1		153	T	0		153	A	0		153	D	0		154	E	0.7
154	Q	0		154	G	0.1		154	A	0		154	A	0.4	V	154	M	0.1		154	Q	0		154	P	0		154	D	0		155	D	0.8
155	T	0		155	Y	0.4		155	P	0		155	S	0.1	D	155	I	0.1		155	T	0		155	K	0		155	E	0		156	L	1.8
156	P	0		156	M	0.4		156	K	0		156	G	0.1	F	156	M	0		156	P	0		156	A	0		156	F	0		157	G	1.8
157	L	0		157	E	0.4		157	P	0		157	Q	0	L	157	P	0		157	V	0		157	A	0		157	A	0		158	A	1.5
158	A	0		158	D	0.4		158	P	0		158	Q	0	P	158	M	0		158	A	0		158	V	0		158	E	0		159	A	1.3
159	T	0		159	W	0.4		159	V	0		159	A	0	R	159	D	0		159	S	0		159	E	0		159	D	0		160	A	1.3
160	H	0		160	W	0.4		160	E	0		160	P	0	E	160	H	0		160	N	0		160	P	0.1		160	D	0		161	S	0
161	Q	0		161	R	0		161	P	0		161	S	0	V	161	G	0		161	Q	0		161	E	0.3		161	D	0		162	P	0.4
162	S	0		162	P	0		162	E	0.3		162	N	0	V	162	Q	0		162	P	0		162	Q	0.4		162	T	0.1		163	S	0.5
163	E	0		163	R	0		163	E	0.4		163	M	0.2	S	163	F	0		163	E	0		163	E	0.4		163	D	0.1		164	K	0.5
164	E	0		164	K	0		164	E	0.5		164	Q	0.4	Y	164	R	0		164	E	0		164	K	0.4		164	S	0.1		165	R	0.6
165	D	0		165	A	0		165	K	0.5		165	Q	0.5	S	165	G	0		165	E	0		165	L	0.3		165	V	0.3		166	L	0.4
166	E	0		166	H	0		166	I	0.5		166	D	0.5	K	166	R	0		166	D	0		166	V	0.3		166	E	0.2		167	S	0.3
167	E	0		167	A	0		167	L	0.4		167	K	0.7	E	167	A	0		167	D	0.1		167	Q	0		167	A	0.2		168	R	17.8
168	D	0		168	T	0		168	K	0.3		168	D	0.7	T	168	H	0		168	E	0.3		168	K	0		168	S	0.1		169	R	18.1
169	E	0.2		169	D	0.1		169	K	0		169	N	0.5	Q	169	S	0		169	E	0.3		169	E	0		169	S	0		170	E	19.3
170	E	0.2		170	Y	0.8		170	D	0		170	L	0.5	T	170	H	0		170	L	0.3		170	E	0		170	E	0		171	R	20.5
171	M	0.2		171	Y	1.1		171	E	0		171	M	0.4	P	171	D	0		171	S	0.3		171	D	0.1		171	T	0		172	D	21.5
172	V	0.2		172	D	1.2		172	E	0		172	Q	0.2	L	172	Q	0		172	V	0		172	K	1.6		172	T	0		173	R	60.3
173	E	0.2		173	E	2.4		173	N	0		173	W	0.2	A	173	D	0		173	P	0		173	E	1.9		173	P	0.2		174	E	68.7
174	S	0.1		174	Y	2.4		174	D	0		174	N	0.1	T	174	S	0		174	K	0		174	G	1.9		174	A	0.2		175	E	70.1
175	K	0		175	N	2		175	S	0		175	M	0.1	H	175	P	0		175	S	0		175	A	2		175	H	0.2		176	E	71.7
176	V	0		176	L	2		176	K	0		176	V	0.1	Q	176	L	0		176	E	0		176	A	1.9		176	Q	0.2		177	L	75.2
177	G	0		177	N	0		177	A	0		177	S	0.1	S	177	P	0.2		177	P	0		177	R	1.9		177	H	0		178	R	74.9
178	Q	0		178	P	0		178	P	0		178	E	0.1	E	178	Y	0.4		178	A	0		178	E	0.8		178	K	0		179	E	73.4
179	D	0		179	G	0		179	P	0		179	N	0.1	E	179	N	1.4		179	S	0		179	L	0.4		179	M	0		180	K	71
180	S	0		180	L	0		180	H	0		180	L	0.1	D	180	E	17.8		180	Q	0.1		180	S	0.2		180	P	0		181	I	70.9
181	E	0.2		181	E	0		181	E	0		181	Q	0.1	E	181	E	19.7		181	Q	0.1		181	E	9.4		181	H	0		182	R	66.7
182	L	0.2		182	W	0		182	L	0		182	S	0	E	182	I	21.7		182	L	0.1		182	E	9.3		182	V	0		183	K	60.2
183	E	0.2		183	E	0		183	T	0		183	E	0	D	183	A	22		183	E	0.1		183	E	9.3		183	E	0		184	E	53.9
184	N	0.2		184	D	0		184	E	2.7		184	T	0	E	184	K	21.6		184	E	0.1		184	K	9.3		184	M	0		185	I	53.9
185	Q	0.8		185	E	0		185	E	2.7		185	D	0.1	E	185	L	20.3		185	E	0		185	L	7.5		185	V	0		186	E	53.2
186	D	0.7		186	F	0		186	E	2.7		186	C	0.1	M	186	L	18.6		186	K	0		186	Q	2.5		186	Q	0		187	E	50.7
187	K	0.7		187	T	0		187	K	2.7		187	D	0.2	V	187	G	14.7		187	T	0		187	I	2.3		187	P	0		188	E	42
188	K	0.7		188	D	0.1		188	Q	1.7		188	C	0.4	E	188	Q	0.2		188	Q	0.1		188	I	2.2		188	A	0		189	L	40.3
189	Q	0.5		189	D	0.1		189	Q	0.7		189	I	0.5	S	189	T	0.1		189	E	0.1		189	H	0.8		189	K	0		190	K	31.4
190	E	0.2		190	E	1.3		190	I	0.6		190	A	0.5	K	190	K	0.1		190	V	0.1		190	S	0.2		190	T	0		191	A	13.6
191	V	0.1		191	E	1.5		191	L	0.4		191	Q	0.3	V	191	Q	0		191	E	0		191	D	0		191	Q	1.1		192	T	13
192	K	0.1		192	S	1.5		192	H	0.2		192	E	0.2	G	192	G	0		192	E	0		192	E	0.1		192	Q	1.1		193	K	7.4
193	E	0		193	S	1.7		193	S	0.1		193	Y	0	Q	193	D	0		193	V	0		193	F	0.1		193	E	1.1		194	E	4.3
194	A	0		194	L	2.4		194	E	0		194	D	0	D	194	K	0		194	H	0		194	A	0.1		194	I	1.1		195	L	2.3
195	P	0		195	Q	2.1		195	E	0		195	P	0.1	S	195	G	0		195	P	0		195	I	0.1		195	E	1.1		196	V	2.1
196	P	0		196	N	1.8		196	F	0		196	G	0.1	E	196	L	0		196	R	0		196	F	0.1		196	Q	1		197	A	1.4
197	R	0		197	L	1.7		197	L	0		197	K	0.5	L	197	T	0.1		197	E	0		197	F	0.1		197	E	0.6		198	D	0.9
198	E	0		198	G	1.4		198	S	0		198	G	0.5	E	198	R	0.7		198	L	0		198	D	0		198	S	0.3		199	G	0.4
199	L	0		199	N	0.1		199	F	0		199	V	0.8	N	199	Q	0.7		199	T	0		199	H	0.3		199	K	6.2		200	V	0.7
200	T	0		200	G	0		200	F	0		200	L	0.9	Q	200	E	0.7		200	N	0.4		200	S	0.4		200	V	6.2		201	L	0.6
201	E	2.6		201	F	0		201	D	0		201	V	0.9	D	201	T	0.7		201	E	0.4		201	T	1.2		201	E	6.2		202	K	0.6
202	E	2.6		202	T	0		202	H	0		202	V	1	K	202	E	3.3		202	E	0.4		202	R	1.6		202	K	6.2		203	Q	0.3
203	E	2.6		203	S	0		203	S	0		203	V	1	K	203	E	3		203	K	0.4		203	I	1.9		203	W	5.6		204	S	0.1
204	K	2.6		204	K	0		204	T	0.1		204	Y	0.8	Q	204	K	2.9		204	E	0.3		204	I	2		204	I	5.6		205	G	0
205	Q	1.6		205	L	0		205	R	0.1		205	L	0.8	E	205	K	2.7		205	Q	0		205	E	2.3		205	K	5.3		206	A	0
206	Q	0.6		206	P	0		206	I	0.1		206	R	0.4	V	206	T	2.6		206	I	0		206	R	2.8		206	E	3.6		207	Q	0
207	I	0.6		207	P	0		207	V	0.1		207	L	0	K	207	Q	0.7		207	V	0		207	A	2.9		207	L	2.1		208	N	0
208	L	0.3		208	G	0		208	E	0.1		208	P	0	E	208	T	0.7		208	H	0		208	L	2.9		208	S	1.1		209	F	0
209	H	0.2		209	Y	0.1		209	R	0.1		209	P	0.2	A	209	V	0.7		209	S	0		209	A	2.9		209	D	9.6		210	P	0
210	S	0.1		210	L	0.1		210	A	0.1		210	A	0.2	P	210	Q	0.1		210	E	0		210	E	1.5		210	D	10.1		211	V	0
211	E	0.1		211	T	0.1		211	L	0.1		211	D	0.3	P	211	I	0.1		211	D	0		211	H	0.4		211	E	11.6		212	R	0
212	E	0.1		212	H	0.1		212	S	0.1		212	L	0.3	R	212	V	0		212	F	0		212	K	0		212	K	11.7		213	A	0
213	F	0.1		213	G	0		213	E	0.1		213	Q	0.2	E	213	P	0		213	L	0.1		213	D	0		213	K	9.5		214	L	0
214	L	0.1		214	L	0		214	Q	0		214	Y	0.1	L	214	P	0		214	F	0		214	L	0		214	Q	5.3		215	T	0
215	I	0.1		215	P	0		215	I	0		215	A	0.1	T	215	L	0		215	F	0		215	F	0		215	I	5.2		216	A	2
216	F	0		216	T	0		216	N	0		216	S	0.1	E	216	S	0		216	F	0		216	F	0		216	M	1.8		217	E	2
217	F	0		217	V	0		217	I	0		217	S	0.3	E	217	D	17.2		217	D	0		217	D	0		217	S	0.7		218	E	2
218	D	0		218	K	0		218	F	0		218	E	0.6	E	218	E	19.3		218	R	0		218	Y	0		218	S	2.3		219	L	2
219	R	0.1		219	D	0		219	F	0		219	A	0.6	K	219	E	19.7		219	S	0		219	S	0		219	E	3		220	D	1.5
220	T	0.1		220	V	0		220	D	0		220	A	0.6	Q	220	K	19.8		220	I	0.1		220	G	0.4		220	D	3.1		221	A	4.2
221	I	0.2		221	A	0		221	Y	0		221	W	0.5	Q	221	Y	18.7		221	R	0.1		221	K	0.5		221	F	4.3		222	V	4.1
222	R	0.2		222	P	0		222	S	0		222	S	0.1	I	222	R	17.6		222	V	0.1		222	D	0.5		222	Q	4.2		223	T	4.1
223	V	0.2		223	A	0		223	G	0.2		223	V	0.2	L	223	L	12		223	V	0.1		223	L	0.5		223	N	3.9		224	K	3.7
224	I	0.2		224	I	0		224	R	0.2		224	V	0.2	H	224	T	11.7		224	E	0.1		224	E	0.4		224	F	3.6		225	S	1.4
225	E	0.2		225	T	0		225	D	0.2		225	N	0.1	S	225	L	8.6		225	R	0.2		225	E	0.2		225	F	3		226	V	1.4
226	R	0.2		226	P	3.8		226	L	0.2		226	V	0.1	E	226	D	0		226	V	0.2		226	K	0		226	N	1		227	E	0.5
227	A	0.2		227	L	3.8		227	E	0.2		227	V	0.1	E	227	P	0.4		227	L	0.2		227	E	0.2		227	R	0.8		228	F	0.2
228	L	0.2		228	E	3.8		228	D	0.1		228	K	0.1	F	228	E	0.4		228	A	0.2		228	G	0.2		228	S	0.3		229	M	0
229	A	0.2		229	I	3.9		229	K	0.1		229	C	0.1	L	229	F	0.4		229	E	0		229	E	0.3		229	S	0.4		230	D	0
230	E	0.1		230	K	2.1		230	E	0.2		230	D	0.1	I	230	L	0.4		230	D	0		230	L	0.3		230	R	0.5		231	F	0.2
231	D	0		231	K	1.4		231	G	0.2		231	N	0.1	F	231	D	0.3		231	K	0		231	Q	0.3		231	L	0.7		232	I	0.2
232	S	0		232	E	0.9		232	E	0.3		232	A	0.4	F	232	S	0.4		232	D	0		232	G	0.2		232	V	0.7		233	D	0.2
233	D	0		233	T	0.9		233	I	0.4		233	S	0.4	D	233	F	0.4		233	I	0		233	G	0		233	E	0.5		234	R	0.6
234	I	0		234	E	2.7		234	Q	0.4		234	G	0.3	R	234	N	0.3		234	F	0		234	T	0.1		234	R	0.6		235	S	0.4
235	F	0		235	V	2.6		235	A	0.4		235	R	0.3	T	235	R	0.3		235	F	0		235	K	0.1		235	V	0.6		236	T	0.5
236	F	0		236	K	2.4		236	G	0.3		236	N	0.1	I	236	S	0.2		236	D	0		236	L	0.1		236	L	0.6		237	K	0.5
237	D	0		237	K	2.2		237	A	0.2		237	G	0.2	R	237	C	0.1		237	Y	0		237	S	0.1		237	A	0.6		238	V	0.5
238	Y	0		238	E	0.8		238	K	0.1		238	L	0.1	V	238	K	0		238	S	0		238	L	0.1		238	E	0.1		239	I	0.5
239	S	0		239	V	0.8		239	L	0.1		239	L	0.2	I	239	V	0		239	G	0.3		239	N	0		239	N	0		240	E	0.3
240	G	0.3		240	N	0.4		240	S	0.1		240	I	0.2	E	240	I	0		240	R	0.3		240	R	0		240	E	0		241	K	0.1
241	R	0.4		241	E	0.5		241	L	0.1		241	D	0.2	R	241	S	0		241	D	0.3		241	S	0		241	T	0		242	A	0.1
242	E	0.4		242	L	0.3		242	N	0		242	M	0.8	A	242	R	0.2		242	M	0.3		242	F	0.1		242	D	0		243	L	0.1
243	L	0.4		243	S	0.4		243	R	0		243	V	0.8	L	243	A	0.2		243	E	0.2		243	F	0.1		243	M	0.1		244	D	0.1
244	E	0.4		244	E	4.5		244	Q	0		244	E	0.8	A	244	L	0.2		244	D	0.1		244	D	0.1		244	Y	0.1		245	Q	0
245	E	0.2		245	E	4.5		245	F	0		245	F	0.7	E	245	N	0.2		245	K	0		245	E	0.5		245	I	0.1		246	E	0
246	K	0		246	Q	4.6		246	F	0		246	R	0.3	D	246	E	0.2		246	E	0.1		246	R	0.5		246	D	0.1		247	Y	0
247	D	0		247	K	4.6		247	D	0		247	G	0.1	S	247	E	0.1		247	G	0.1		247	W	0.5		247	Y	0.1		248	D	0
248	G	0		248	Q	3.3		248	E	0.2		248	T	0.1	D	248	I	0.1		248	D	0.1		248	S	0.4		248	V	0.1		249	I	0.3
249	D	0		249	M	2		249	R	0.2		249	R	0.1	I	249	D	0.1		249	L	0.2		249	K	0.2		249	G	0		250	L	0.3
250	V	0.1		250	I	2		250	W	0.2		250	I	0.1	F	250	I	0.2		250	Q	0.2		250	H	0.1		250	S	0		251	T	0.3
251	Q	0.1		251	I	2		251	S	0.2		251	M	0.1	F	251	C	0.2		251	A	0.2		251	R	0		251	D	0.1		252	D	0.3
252	A	0.1		252	L	1.6		252	K	0.1		252	T	0.2	D	252	I	0.2		252	G	0.1		252	V	0		252	K	0.1		253	Y	0.1
253	G	0.1		253	S	0.6		253	H	0		253	A	1.3	Y	253	N	0.2		253	S	0		253	V	0		253	E	0.1		254	T	0.1
254	A	0.1		254	E	0.1		254	R	0		254	T	1.3	S	254	Y	0		254	N	0		254	T	0		254	G	0.1		255	L	0.1
255	N	0		255	N	0.1		255	V	0		255	I	1.8	G	255	T	0		255	L	0		255	C	0		255	K	0		256	Q	0
256	L	0		256	F	0.1		256	V	0		256	L	1.8	R	256	K	0		256	S	0		256	M	0		256	D	0		257	V	0
257	S	0		257	Q	0		257	S	0		257	R	1.5	E	257	D	0		257	F	0		257	D	0		257	D	0.1		258	H	0
258	F	0		258	R	0		258	C	0		258	R	0.9	L	258	P	0.1		258	N	0		258	W	0		258	D	1.2		259	D	0
259	N	0		259	F	0		259	L	0		259	Y	0.1	E	259	Y	0.1		259	R	0		259	S	0		259	Q	4.3		260	V	0
260	R	0		260	V	0		260	D	0		260	H	0	E	260	E	0.1		260	H	0		260	P	0		260	F	4.4
												261	P	0	K	261	K	0.1		261	F	0		261	Q	0		261	A	4.7
												262	E	0	D	262	A	0.1		262	Y	0		262	Y	0		262	G	4.7
												263	S	0	G	263	I	0.1		263	D	0		263	P	0		263	D	4.4
												264	N	0.6	D	264	A	0.1		264	E	0		264	E	0.1		264	R	5.5
												265	V	3.2	V	265	S	0.1		265	H	0		265	L	0.1		265	L	5.5
												266	I	3.3	Q	266	D	0.4		266	W	0		266	L	0.1		266	K	5.2
												267	S	3.4	A	267	D	0.8		267	S	0		267	V	0.1		267	L	4.2
												268	I	3.8	G	268	L	1.8		268	K	0		268	A	0		268	N	1.5
												269	L	3.9	A	269	L	1.9		269	H	0		269	S	0		269	R	0.8
												270	L	3.9	N	270	H	1.8		270	R	0		270	Y	0		270	Y	0.2
												271	A	3.2	L	271	L	1.9		271	V	0		271	N	0		271	F	0.1
												272	T	3.2	S	272	A	1.6		272	V	0		272	N	0		272	F	0.1
												273	L	7.4	F	273	Q	0.5		273	T	0		273	K	0		273	D	0.1
												274	T	8	N	274	V	0.5		274	S	0		274	E	0		274	E	0.7
												275	G	9.7	R	275	Y	0.3		275	L	0		275	D	0		275	R	0.8
												276	K	13.9		276	Q	0.3		276	D	0		276	A	0		276	W	0.8
												277	I	14.6		277	D	0.1		277	W	0		277	P	0		277	S	0.7
												278	I	15.1		278	E	0.2		278	S	0		278	H	0		278	K	0.4
												279	L	17.9		279	T	0.3		279	P	0		279	E	0		279	H	0.1
												280	Y	19.4		280	W	1.2		280	Q	0		280	P	0		280	R	0
												281	E	20.5		281	T	1.2		281	Y	0		281	D	0		281	T	0
												282	L	21.8		282	A	1.2		282	P	0		282	G	0		282	I	0
												283	R	21.3		283	K	1		283	E	0		283	V	0.5		283	T	0
												284	L	20.8		284	R	0.5		284	L	0		284	A	0.6		284	S	0.1
												285	K	18.1		285	L	0		285	L	0		285	L	0.6		285	L	0.1
												286	Q	8.6		286	V	0		286	V	0		286	V	0.7		286	D	0.1
												287	K	1.4		287	T	0		287	A	0		287	W	0.7		287	W	0.3
												288	K	0						288	S	0		288	N	0.7		288	S	0.2
												289	P	0						289	Y	0		289	M	0.8		289	T	0.2
												290	E	0						290	N	0		290	K	0.8		290	Q	0.2
												291	T	0						291	T	0		291	F	0.7		291	H	0
												292	P	0.2						292	N	0		292	K	0.2		292	P	0
												293	V	0.2						293	E	0		293	K	0		293	E	0
												294	V	0.2						294	D	0		294	P	0		294	L	0
												295	Y	0.2						295	A	0		295	T	0		295	L	0
												296	V	0.2						296	P	0		296	P	0		296	V	0
												297	V	0.3						297	H	0		297	E	0		297	A	0
												298	Q	0.2						298	E	0		298	Y	0		298	S	0
												299	R	0.1						299	P	0		299	I	0		299	Y	0
												300	N	0.1						300	D	0		300	F	0		300	N	0
												301	M	0.1						301	G	0
												302	V	0.1						302	V	0
												303	A	0.1						303	V	0
												304	R	0.1						304	L	0
												305	H	0.1
												306	Y	0
												307	F	0
												308	Q	0
												309	H	0
												310	P	0
												311	V	0
												312	V	0
												313	A	0
												314	V	0
												315	I	0
												316	E	0
												317	T	0
												318	S	0
												319	S	0
												320	V	0.1
												321	Q	0.1
												322	D	0.1
												323	Q	0.1
												324	E	0.1
												325	R	0
												326	V	0
												327	L	0
												328	V	0
