# Supplementary material for: Multivalency, autoinhibition, and protein disorder in the regulation of interactions of dynein intermediate chain with dynactin and the nuclear distribution protein
Source: eLife journal article supplement (doi:10.7554/elife.80217), 2022-11-23
Supplement: fig3-figsupp2-data1 [file Figure 3- figure supplement 2- source data 1.xlsx]

## Sheet: SV-AUC
	IC100-260	IC100-260 + IC88	IC260
0	0.00587	0.00829	0.00514
0.152	2.37	5.17	0.549
0.303	0.00888	0.283	0.00203
0.455	2.46e-05	0.00634	6.97e-08
0.606	5.92e-07	1.5e-05	2e-13
0.758	4.82e-07	1.08e-08	1.19e-14
0.909	1.1e-05	4.11e-11	5.21e-14
1.06	0.00141	1.01e-11	4.49e-14
1.21	0.124	2.79e-10	5.3e-14
1.36	1.63	1.83e-07	7.59e-15
1.52	2.18	0.000224	1.78e-14
1.67	0.571	0.0593	8.08e-11
1.82	0.0905	1.23	7.55e-06
1.97	0.0224	2.34	0.0466
2.12	0.0129	0.918	4.1
2.27	0.0152	0.183	2.44
2.42	0.0254	0.0354	0.0108
2.58	0.0421	0.00958	8.01e-07
2.73	0.0562	0.00407	3.49e-12
2.88	0.0583	0.00276	2.5e-14
3.03	0.0504	0.00275	2.03e-14
3.18	0.04	0.00371	1.06e-14
3.33	0.0317	0.0058	2.72e-14
3.48	0.0264	0.00956	1e-14
3.64	0.0233	0.0151	8.83e-15
3.79	0.0216	0.0215	1.72e-14
3.94	0.0204	0.0271	6.99e-15
4.09	0.0192	0.0299	7.64e-15
4.24	0.0175	0.0293	1.8e-14
4.39	0.0153	0.0262	6.26e-14
4.55	0.013	0.0219	3.02e-14
4.7	0.011	0.0176	1.57e-14
4.85	0.00951	0.0139	9.07e-15
5	0.00848	0.0112	6.32e-14
5.15	0.00787	0.00926	3.07e-14
5.3	0.00757	0.00795	2.41e-14
5.45	0.00742	0.00717	1.61e-14
5.61	0.0073	0.0067	1.26e-14
5.76	0.00712	0.00647	1.08e-14
5.91	0.00682	0.00639	1.11e-14
6.06	0.00639	0.00637	1.01e-14
6.21	0.00587	0.00635	9.86e-15
6.36	0.00531	0.00627	1.01e-14
6.52	0.00479	0.0061	1.2e-13
6.67	0.00433	0.00584	1.97e-12
6.82	0.00396	0.00552	2.51e-11
6.97	0.00367	0.00518	2.53e-10
7.12	0.00344	0.00483	2.06e-09
7.27	0.00326	0.00452	1.38e-08
7.42	0.00311	0.00425	7.64e-08
7.58	0.00296	0.00405	3.58e-07
7.73	0.00281	0.00389	1.43e-06
7.88	0.00264	0.00379	4.97e-06
8.03	0.00245	0.00372	1.5e-05
8.18	0.00224	0.00367	3.96e-05
8.33	0.00201	0.00364	9.31e-05
8.48	0.00179	0.0036	0.000195
8.64	0.00157	0.00356	0.000368
8.79	0.00137	0.00349	0.00063
8.94	0.0012	0.00341	0.000986
9.09	0.00107	0.00331	0.00142
9.24	0.000966	0.00319	0.00191
9.39	0.000898	0.00307	0.00239
9.55	0.000861	0.00295	0.00283
9.7	0.000854	0.00282	0.00316
9.85	0.000876	0.0027	0.0034
10	0.000925	0.00257	0.0035
10.2	0.001	0.00245	0.00348
10.3	0.0011	0.00232	0.00337
10.5	0.00121	0.00219	0.00318
10.6	0.00133	0.00206	0.00295
10.8	0.00145	0.00192	0.0027
10.9	0.00156	0.00178	0.00245
11.1	0.00163	0.00164	0.00222
11.2	0.00168	0.00151	0.00201
11.4	0.0017	0.00139	0.00183
11.5	0.00168	0.00128	0.00168
11.7	0.00165	0.00119	0.00156
11.8	0.0016	0.00111	0.00146
12	0.00155	0.00105	0.00141
12.1	0.00152	0.00101	0.00136
12.3	0.00149	0.000984	0.00135
12.4	0.00148	0.00098	0.00136
12.6	0.0015	0.000999	0.0014
12.7	0.00154	0.00104	0.00146
12.9	0.00161	0.00111	0.00156
13	0.00172	0.00122	0.00169
13.2	0.00188	0.00137	0.00188
13.3	0.00212	0.00158	0.00211
13.5	0.00246	0.00189	0.00244
13.6	0.00295	0.00233	0.00288
13.8	0.00367	0.00298	0.00345
13.9	0.00475	0.00395	0.00425
14.1	0.00641	0.00546	0.0053
14.2	0.00902	0.00787	0.00683
14.4	0.0132	0.0119	0.00896
14.5	0.0203	0.0187	0.0119
14.7	0.0324	0.031	0.0164
14.8	0.0538	0.0536	0.0229
15	0.186	0.195	0.0647

## Sheet: SEC-MALS
time	MW		IC100-260 + IC88
19.7264	38.4816	time (min)	RI
19.7349	38.2485	15.1226	-0.0036116
19.7435	37.835	15.1314	-0.00350996
19.752	37.4288	15.1402	-0.00337382
19.7605	36.9414	15.149	-0.00323124
19.7691	36.3767	15.1577	-0.00323337
19.7776	35.8667	15.1665	-0.00324424
19.7861	35.4955	15.1753	-0.00327387
19.7947	35.207	15.184	-0.0033035
19.8032	35.0354	15.1928	-0.00329895
19.8117	34.8645	15.2016	-0.00320265
19.8203	34.6972	15.2104	-0.00312304
19.8288	34.5206	15.2191	-0.00309599
19.8373	34.2943	15.2279	-0.00304449
19.8459	34.0089	15.2367	-0.0029254
19.8544	33.772	15.2455	-0.00274168
19.8629	33.5715	15.2542	-0.00264233
19.8715	33.3775	15.263	-0.00266321
19.88	33.1047	15.2718	-0.00268408
19.8885	32.7653	15.2805	-0.0027355
19.8971	32.3877	15.2893	-0.0027613
19.9056	31.9054	15.2981	-0.00264519
19.9141	31.4645	15.3069	-0.00252966
19.9227	31.209	15.3156	-0.00248197
19.9312	31.1332	15.3244	-0.00243054
19.9397	31.1495	15.3332	-0.00233131
19.9482	31.1643	15.3419	-0.00213712
19.9568	31.1205	15.3507	-0.00210765
19.9653	30.9821	15.3595	-0.00207818
19.9738	30.7232	15.3683	-0.0020614
19.9824	30.5234	15.377	-0.00204462
19.9909	30.343	15.3858	-0.00202172
19.9994	30.09	15.3946	-0.00189462
20.008	29.8155	15.4033	-0.00183058
20.0165	29.5519	15.4121	-0.00178189
20.025	29.3131	15.4209	-0.00174559
20.0336	29.1327	15.4297	-0.00166163
20.0421	28.9877	15.4384	-0.00146474
20.0506	28.8565	15.4472	-0.00130923
20.0592	28.7732	15.456	-0.00123406
20.0677	28.8722	15.4648	-0.00124833
20.0762	29.0247	15.4735	-0.0012626
20.0848	29.1232	15.4823	-0.00124713
20.0933	29.1025	15.4911	-0.00125755
20.1018	29.0475	15.4998	-0.00124693
20.1104	29.0125	15.5086	-0.0011062
20.1189	28.9792	15.5174	-0.00100166
20.1274	28.948	15.5262	-0.000990435
20.136	28.8765	15.5349	-0.000895278
20.1445	28.8066	15.5437	-0.000708051
20.153	28.7411	15.5525	-0.00056364
20.1616	28.6627	15.5612	-0.0005495
20.1701	28.6184	15.57	-0.00055891
20.1786	28.6273	15.5788	-0.000574149
20.1872	28.6384	15.5876	-0.000589388
20.1957	28.6587	15.5963	-0.000540487
20.2042	28.6858	15.6051	-0.00038728
20.2128	28.6998	15.6139	-0.00031601
20.2213	28.6929	15.6226	-0.00031218
20.2298	28.6784	15.6314	-0.000205951
20.2384	28.6294	15.6402	-5.77e-05
20.2469	28.5598	15.649	6.99e-05
20.2554	28.5814	15.6577	0.000123097
20.264	28.672	15.6665	0.000136139
20.2725	28.7421	15.6753	0.000131223
20.281	28.7413	15.6841	0.000126308
20.2896	28.718	15.6928	0.000224925
20.2981	28.5603	15.7016	0.00035896
20.3066	28.3434	15.7104	0.000460869
20.3152	28.2558	15.7191	0.000578243
20.3237	28.2913	15.7279	0.000680013
20.3322	28.4107	15.7367	0.000852502
20.3408	28.5466	15.7455	0.00099894
20.3493	28.669	15.7542	0.00110824
20.3578	28.7862	15.763	0.00116221
20.3664	28.9162	15.7718	0.001159
20.3749	29.0681	15.7805	0.00120319
20.3834	29.2338	15.7893	0.00125576
20.392	29.3778	15.7981	0.00137623
20.4005	29.5075	15.8069	0.0014978
20.409	29.5552	15.8156	0.0015868
20.4176	29.5621	15.8244	0.00167745
20.4261	29.5107	15.8332	0.00180562
20.4346	29.3288	15.8419	0.00196011
20.4432	29.1565	15.8507	0.00211021
20.4517	29.0252	15.8595	0.00217594
20.4602	28.9004	15.8683	0.00219654
20.4688	28.7636	15.877	0.00219692
20.4773	28.6519	15.8858	0.0021973
20.4858	28.5887	15.8946	0.00229219
20.4944	28.5903	15.9034	0.00242052
20.5029	28.6354	15.9121	0.00253435
20.5114	28.7502	15.9209	0.00265943
20.52	28.9267	15.9297	0.00276615
20.5285	29.1216	15.9384	0.0029118
20.537	29.2683	15.9472	0.00309738
20.5456	29.4066	15.956	0.00322326
20.5541	29.5657	15.9648	0.00333342
20.5626	29.7609	15.9735	0.00334994
20.5712	29.9492	15.9823	0.00336646
20.5797	30.122	15.9911	0.00335337
20.5882	30.3132	15.9998	0.00346393
20.5968	30.4993	16.0086	0.00359409
20.6053	30.6267	16.0174	0.003675
20.6138	30.6208	16.0262	0.00372252
20.6224	30.5039	16.0349	0.00380161
20.6309	30.4987	16.0437	0.00398696
20.6394	30.6381	16.0525	0.0041203
20.648	30.7823	16.0612	0.00417719
20.6565	30.929	16.07	0.00417525
20.665	31.1063	16.0788	0.00417332
20.6736	31.3128	16.0876	0.00416529
20.6821	31.4588	16.0963	0.00429855
		16.1051	0.00442975
		16.1139	0.00451916
		16.1227	0.00455936
		16.1314	0.00457632
		16.1402	0.00472687
		16.149	0.00484389
		16.1577	0.00485652
		16.1665	0.00484219
		16.1753	0.00480624
		16.1841	0.0047703
		16.1928	0.00481903
		16.2016	0.00495175
		16.2104	0.00503081
		16.2191	0.00508731
		16.2279	0.0051083
		16.2367	0.00516068
		16.2455	0.0052962
		16.2542	0.00533337
		16.263	0.00531085
		16.2718	0.00528832
		16.2805	0.00524393
		16.2893	0.00510068
		16.2981	0.00515349
		16.3069	0.00525055
		16.3156	0.00523909
		16.3244	0.00522764
		16.3332	0.00526532
		16.342	0.00538245
		16.3507	0.00544906
		16.3595	0.00540405
		16.3683	0.00535904
		16.377	0.00527636
		16.3858	0.00510778
		16.3946	0.00510665
		16.4034	0.00517117
		16.4121	0.00516372
		16.4209	0.00515093
		16.4297	0.00513813
		16.4384	0.0052095
		16.4472	0.00524782
		16.456	0.00525782
		16.4648	0.00520952
		16.4735	0.00516123
		16.4823	0.00502591
		16.4911	0.00492334
		16.4998	0.00489947
		16.5086	0.00486668
		16.5174	0.0048339
		16.5262	0.00475467
		16.5349	0.00478117
		16.5437	0.00482213
		16.5525	0.00482529
		16.5613	0.00476567
		16.57	0.00470605
		16.5788	0.00458214
		16.5876	0.00445569
		16.5963	0.00445768
		16.6051	0.0045003
		16.6139	0.00447842
		16.6227	0.00445655
		16.6314	0.00442475
		16.6402	0.0044719
		16.649	0.00449218
		16.6577	0.00445708
		16.6665	0.00442199
		16.6753	0.00436619
		16.6841	0.00419742
		16.6928	0.00414062
		16.7016	0.00416249
		16.7104	0.00416142
		16.7191	0.00414866
		16.7279	0.00413589
		16.7367	0.00413357
		16.7455	0.00413926
		16.7542	0.00412987
		16.763	0.00408563
		16.7718	0.00404139
		16.7806	0.0039623
		16.7893	0.00381229
		16.7981	0.00380109
		16.8069	0.00382867
		16.8156	0.00383403
		16.8244	0.0038394
		16.8332	0.00387031
		16.842	0.00396236
		16.8507	0.0039847
		16.8595	0.00396946
		16.8683	0.00394764
		16.877	0.00392583
		16.8858	0.00377774
		16.8946	0.00370406
		16.9034	0.00376999
		16.9121	0.00380956
		16.9209	0.00381457
		16.9297	0.00382362
		16.9384	0.00387347
		16.9472	0.00398353
		16.956	0.00399681
		16.9648	0.00397937
		16.9735	0.00396193
		16.9823	0.00381576
		16.9911	0.00382499
		16.9999	0.003826
		17.0086	0.00382701
		17.0174	0.00394422
		17.0262	0.00396908
		17.0349	0.00399393
		17.0437	0.00409062
		17.0525	0.00421618
		17.0613	0.00419926
		17.07	0.00418234
		17.0788	0.00412676
		17.0876	0.00399423
		17.0963	0.00402535
		17.1051	0.0041362
		17.1139	0.00416885
		17.1227	0.00416456
		17.1314	0.00419852
		17.1402	0.00428535
		17.149	0.00440898
		17.1577	0.00447665
		17.1665	0.00444496
		17.1753	0.00441326
		17.1841	0.00433202
		17.1928	0.00433582
		17.2016	0.00442664
		17.2104	0.0045279
		17.2192	0.00459091
		17.2279	0.00460572
		17.2367	0.00470841
		17.2455	0.00492409
		17.2542	0.00498339
		17.263	0.00497603
		17.2718	0.00496115
		17.2806	0.0049367
		17.2893	0.00491225
		17.2981	0.00507122
		17.3069	0.00516078
		17.3156	0.00521972
		17.3244	0.00526789
		17.3332	0.00536813
		17.342	0.00555273
		17.3507	0.00564666
		17.3595	0.00566007
		17.3683	0.0056542
		17.377	0.00560002
		17.3858	0.00554584
		17.3946	0.00555773
		17.4034	0.00563578
		17.4121	0.00570905
		17.4209	0.00582906
		17.4297	0.00585463
		17.4385	0.00594779
		17.4472	0.00608648
		17.456	0.00614836
		17.4648	0.00614093
		17.4735	0.00611998
		17.4823	0.00609903
		17.4911	0.00609985
		17.4999	0.0062044
		17.5086	0.00633089
		17.5174	0.00639439
		17.5262	0.00646124
		17.5349	0.0065779
		17.5437	0.00671981
		17.5525	0.00689691
		17.5613	0.00688397
		17.57	0.00685625
		17.5788	0.00682853
		17.5876	0.00677887
		17.5963	0.00693917
		17.6051	0.00708578
		17.6139	0.00716442
		17.6227	0.00722087
		17.6314	0.00724116
		17.6402	0.00737704
		17.649	0.00755554
		17.6578	0.00758608
		17.6665	0.00759247
		17.6753	0.00753209
		17.6841	0.00747171
		17.6928	0.00747908
		17.7016	0.00761534
		17.7104	0.00769872
		17.7192	0.00776666
		17.7279	0.00776921
		17.7367	0.0078447
		17.7455	0.00800932
		17.7542	0.00815871
		17.763	0.00814243
		17.7718	0.00812615
		17.7806	0.0081008
		17.7893	0.00800234
		17.7981	0.00803933
		17.8069	0.0082124
		17.8156	0.00822548
		17.8244	0.00823856
		17.8332	0.00822562
		17.842	0.00837276
		17.8507	0.00850899
		17.8595	0.0085112
		17.8683	0.00848966
		17.8771	0.00846813
		17.8858	0.00829646
		17.8946	0.00832063
		17.9034	0.0084657
		17.9121	0.00856642
		17.9209	0.00858641
		17.9297	0.0085977
		17.9385	0.00868132
		17.9472	0.0088008
		17.956	0.0087972
		17.9648	0.00876362
		17.9735	0.00873005
		17.9823	0.00859766
		17.9911	0.00855442
		17.9999	0.00855793
		18.0086	0.00854996
		18.0174	0.00854199
		18.0262	0.00852706
		18.0349	0.00854606
		18.0437	0.0085992
		18.0525	0.00859687
		18.0613	0.00856608
		18.07	0.00853529
		18.0788	0.00840628
		18.0876	0.00827031
		18.0964	0.00818473
		18.1051	0.00817824
		18.1139	0.0081511
		18.1227	0.00812395
		18.1314	0.00803892
		18.1402	0.00804526
		18.149	0.00802632
		18.1578	0.00800738
		18.1665	0.00796932
		18.1753	0.00780301
		18.1841	0.00753688
		18.1928	0.00746286
		18.2016	0.0074052
		18.2104	0.00728734
		18.2192	0.00718221
		18.2279	0.00708001
		18.2367	0.00705197
		18.2455	0.00703248
		18.2542	0.00701298
		18.263	0.00692725
		18.2718	0.00679131
		18.2806	0.00654538
		18.2893	0.00640381
		18.2981	0.00629557
		18.3069	0.00621774
		18.3157	0.00612933
		18.3244	0.00604091
		18.3332	0.00595816
		18.342	0.00593473
		18.3507	0.0059113
		18.3595	0.00586627
		18.3683	0.00574507
		18.3771	0.00560084
		18.3858	0.00537608
		18.3946	0.00517341
		18.4034	0.00512879
		18.4121	0.00508559
		18.4209	0.00497834
		18.4297	0.00485216
		18.4385	0.00477361
		18.4472	0.00475213
		18.456	0.00470278
		18.4648	0.00465344
		18.4735	0.00446314
		18.4823	0.00429701
		18.4911	0.00411737
		18.4999	0.0040322
		18.5086	0.00398525
		18.5174	0.00393683
		18.5262	0.00384639
		18.535	0.00376531
		18.5437	0.00380431
		18.5525	0.00381507
		18.5613	0.00377792
		18.57	0.00374078
		18.5788	0.00363117
		18.5876	0.00345854
		18.5964	0.00339656
		18.6051	0.00341706
		18.6139	0.00341642
		18.6227	0.00340268
		18.6314	0.00338895
		18.6402	0.00342335
		18.649	0.0035323
		18.6578	0.00357659
		18.6665	0.00351497
		18.6753	0.00345334
		18.6841	0.00332701
		18.6928	0.00325329
		18.7016	0.00339093
		18.7104	0.00341225
		18.7192	0.00343356
		18.7279	0.00345311
		18.7367	0.00353321
		18.7455	0.00368255
		18.7543	0.00386654
		18.763	0.00387544
		18.7718	0.00386657
		18.7806	0.00383855
		18.7893	0.00381052
		18.7981	0.00390729
		18.8069	0.00399373
		18.8157	0.00410012
		18.8244	0.00424267
		18.8332	0.00430174
		18.842	0.00450212
		18.8507	0.00477754
		18.8595	0.00495696
		18.8683	0.00509018
		18.8771	0.00516337
		18.8858	0.00520078
		18.8946	0.00532333
		18.9034	0.00559743
		18.9121	0.00586656
		18.9209	0.00603929
		18.9297	0.00628174
		18.9385	0.00663354
		18.9472	0.00700731
		18.956	0.00732648
		18.9648	0.00763918
		18.9736	0.00786146
		18.9823	0.00797523
		18.9911	0.00818431
		18.9999	0.00859266
		19.0086	0.00904053
		19.0174	0.00946142
		19.0262	0.00993701
		19.035	0.0103687
		19.0437	0.0108896
		19.0525	0.0115616
		19.0613	0.0121276
		19.07	0.0126158
		19.0788	0.0131573
		19.0876	0.0136507
		19.0964	0.0142281
		19.1051	0.0150036
		19.1139	0.0158804
		19.1227	0.016746
		19.1314	0.0175823
		19.1402	0.0186264
		19.149	0.0198095
		19.1578	0.020935
		19.1665	0.0220746
		19.1753	0.0232151
		19.1841	0.024347
		19.1929	0.0256026
		19.2016	0.0270635
		19.2104	0.0286484
		19.2192	0.0303403
		19.2279	0.0321351
		19.2367	0.0340576
		19.2455	0.0361462
		19.2543	0.038438
		19.263	0.0408346
		19.2718	0.043157
		19.2806	0.0454743
		19.2893	0.0478804
		19.2981	0.0505294
		19.3069	0.0535321
		19.3157	0.056731
		19.3244	0.0600174
		19.3332	0.0633728
		19.342	0.067055
		19.3507	0.0712338
		19.3595	0.0761077
		19.3683	0.0815567
		19.3771	0.0867794
		19.3858	0.091355
		19.3946	0.0958628
		19.4034	0.100896
		19.4122	0.107212
		19.4209	0.113921
		19.4297	0.120666
		19.4385	0.127741
		19.4472	0.13489
		19.456	0.142136
		19.4648	0.149046
		19.4736	0.15596
		19.4823	0.162912
		19.4911	0.169891
		19.4999	0.177281
		19.5086	0.185367
		19.5174	0.193784
		19.5262	0.202321
		19.535	0.211009
		19.5437	0.220225
		19.5525	0.230175
		19.5613	0.240226
		19.57	0.250023
		19.5788	0.259834
		19.5876	0.270253
		19.5964	0.281263
		19.6051	0.29231
		19.6139	0.30339
		19.6227	0.314531
		19.6315	0.325703
		19.6402	0.3373
		19.649	0.349612
		19.6578	0.362136
		19.6665	0.374366
		19.6753	0.386441
		19.6841	0.398209
		19.6929	0.40971
		19.7016	0.421839
		19.7104	0.434684
		19.7192	0.447596
		19.7279	0.460557
		19.7367	0.473562
		19.7455	0.486987
		19.7543	0.500979
		19.763	0.51471
		19.7718	0.527883
		19.7806	0.540644
		19.7893	0.552948
		19.7981	0.565432
		19.8069	0.578566
		19.8157	0.5919
		19.8244	0.605108
		19.8332	0.618092
		19.842	0.631179
		19.8508	0.644859
		19.8595	0.658493
		19.8683	0.671338
		19.8771	0.68446
		19.8858	0.697193
		19.8946	0.708846
		19.9034	0.720792
		19.9122	0.734563
		19.9209	0.750433
		19.9297	0.76441
		19.9385	0.775791
		19.9472	0.787478
		19.956	0.799251
		19.9648	0.810315
		19.9736	0.820744
		19.9823	0.830613
		19.9911	0.83982
		19.9999	0.84916
		20.0086	0.85886
		20.0174	0.868288
		20.0262	0.87737
		20.035	0.885974
		20.0437	0.894445
		20.0525	0.903055
		20.0613	0.911264
		20.0701	0.918723
		20.0788	0.925553
		20.0876	0.931829
		20.0964	0.937804
		20.1051	0.94387
		20.1139	0.949754
		20.1227	0.955216
		20.1315	0.960367
		20.1402	0.965319
		20.149	0.970093
		20.1578	0.974435
		20.1665	0.978257
		20.1753	0.981667
		20.1841	0.984816
		20.1929	0.987746
		20.2016	0.990958
		20.2104	0.993791
		20.2192	0.995607
		20.2279	0.997151
		20.2367	0.998416
		20.2455	0.999371
		20.2543	1
		20.263	0.999924
		20.2718	0.999848
		20.2806	0.999621
		20.2894	0.998866
		20.2981	0.998034
		20.3069	0.996877
		20.3157	0.995448
		20.3244	0.993542
		20.3332	0.990684
		20.342	0.988389
		20.3508	0.985603
		20.3595	0.981912
		20.3683	0.978842
		20.3771	0.975545
		20.3858	0.972106
		20.3946	0.968568
		20.4034	0.964781
		20.4122	0.960751
		20.4209	0.956421
		20.4297	0.951862
		20.4385	0.947235
		20.4472	0.942286
		20.456	0.936972
		20.4648	0.931586
		20.4736	0.926212
		20.4823	0.920821
		20.4911	0.915459
		20.4999	0.909956
		20.5087	0.904102
		20.5174	0.898024
		20.5262	0.891897
		20.535	0.885727
		20.5437	0.879345
		20.5525	0.872648
		20.5613	0.865872
		20.5701	0.859203
		20.5788	0.852551
		20.5876	0.846123
		20.5964	0.839767
		20.6051	0.83307
		20.6139	0.826151
		20.6227	0.819227
		20.6315	0.812265
		20.6402	0.805353
		20.649	0.798328
		20.6578	0.790937
		20.6665	0.783701
		20.6753	0.776773
		20.6841	0.769936
		20.6929	0.763384
		20.7016	0.756804
		20.7104	0.747537
		20.7192	0.736655
		20.728	0.728222
		20.7367	0.721523
		20.7455	0.714718
		20.7543	0.707663
		20.763	0.70077
		20.7718	0.694086
		20.7806	0.686752
		20.7894	0.679561
		20.7981	0.673363
		20.8069	0.66713
		20.8157	0.660818
		20.8244	0.654605
		20.8332	0.64852
		20.842	0.642492
		20.8508	0.636377
		20.8595	0.630213
		20.8683	0.624267
		20.8771	0.618647
		20.8858	0.613241
		20.8946	0.608089
		20.9034	0.60285
		20.9122	0.597532
		20.9209	0.592324
		20.9297	0.587191
		20.9385	0.582272
		20.9473	0.577338
		20.956	0.572305
		20.9648	0.567457
		20.9736	0.5628
		20.9823	0.558297
		20.9911	0.554078
		20.9999	0.550023
		21.0087	0.545812
		21.0174	0.541634
		21.0262	0.537592
		21.035	0.533629
		21.0437	0.529836
		21.0525	0.526004
		21.0613	0.522161
		21.0701	0.518524
		21.0788	0.514976
		21.0876	0.511644
		21.0964	0.508546
		21.1051	0.505391
		21.1139	0.50215
		21.1227	0.499033
		21.1315	0.495979
		21.1402	0.49298
		21.149	0.490043
		21.1578	0.487045
		21.1666	0.484161
		21.1753	0.481401
		21.1841	0.478682
		21.1929	0.476089
		21.2016	0.473655
		21.2104	0.471218
		21.2192	0.468714
		21.228	0.466207
		21.2367	0.463789
		21.2455	0.461439
		21.2543	0.459073
		21.263	0.456698
		21.2718	0.454385
		21.2806	0.452105
		21.2894	0.4499
		21.2981	0.447814
		21.3069	0.445702
		21.3157	0.44355
		21.3244	0.441406
		21.3332	0.439302
		21.342	0.437201
		21.3508	0.43505
		21.3595	0.432916
		21.3683	0.430788
		21.3771	0.428664
		21.3859	0.426545
		21.3946	0.424541
		21.4034	0.422587
		21.4122	0.420532
		21.4209	0.418384
		21.4297	0.416239
		21.4385	0.414138
		21.4473	0.412045
		21.456	0.409936
		21.4648	0.407791
		21.4736	0.405612
		21.4823	0.403343
		21.4911	0.401215
		21.4999	0.399192
		21.5087	0.397035
		21.5174	0.394742
		21.5262	0.392495
		21.535	0.390275
		21.5437	0.388088
		21.5525	0.385873
		21.5613	0.383478
		21.5701	0.381118
		21.5788	0.378811
		21.5876	0.376497
		21.5964	0.374254
		21.6052	0.372023
		21.6139	0.369674
		21.6227	0.367296
		21.6315	0.364961
		21.6402	0.362592
		21.649	0.360215
		21.6578	0.35775
		21.6666	0.355245
		21.6753	0.35277
		21.6841	0.350228
		21.6929	0.34785
		21.7016	0.345556
		21.7104	0.343136
		21.7192	0.340614
		21.728	0.338052
		21.7367	0.335611
		21.7455	0.333207
		21.7543	0.330617
		21.763	0.327983
		21.7718	0.325492
		21.7806	0.322917
		21.7894	0.320363
		21.7981	0.317959
		21.8069	0.315512
		21.8157	0.312961
		21.8245	0.31049
		21.8332	0.308017
		21.842	0.305487
		21.8508	0.302974
		21.8595	0.300429
		21.8683	0.297848
		21.8771	0.295268
		21.8859	0.292824
		21.8946	0.290481
		21.9034	0.288109
		21.9122	0.285721
		21.9209	0.283307
		21.9297	0.280872
		21.9385	0.278513
		21.9473	0.276223
		21.956	0.273816
		21.9648	0.270284
		21.9736	0.266868
		21.9823	0.264519
		21.9911	0.261965
		21.9999	0.259579
		22.0087	0.257422
		22.0174	0.255157
		22.0262	0.252907
		22.035	0.250699
		22.0438	0.248562
		22.0525	0.246441
		22.0613	0.244267
		22.0701	0.242154
		22.0788	0.240069
		22.0876	0.237978
		22.0964	0.236007
		22.1052	0.234088
		22.1139	0.232181
		22.1227	0.230303
		22.1315	0.228352
		22.1402	0.226436
		22.149	0.224714
		22.1578	0.222944
		22.1666	0.221088
		22.1753	0.219253
		22.1841	0.21744
		22.1929	0.215748
		22.2016	0.214153
		22.2104	0.212657
		22.2192	0.211097
		22.228	0.209469
		22.2367	0.20798
		22.2455	0.206482
		22.2543	0.204992
		22.2631	0.203588
		22.2718	0.202124
		22.2806	0.200665
		22.2894	0.199252
		22.2981	0.197983
		22.3069	0.19679
		22.3157	0.195546
		22.3245	0.194342
		22.3332	0.193183
		22.342	0.192049
		22.3508	0.190936
		22.3595	0.189911
		22.3683	0.188855
		22.3771	0.187759
		22.3859	0.186648
		22.3946	0.185701
		22.4034	0.184849
		22.4122	0.183948
		22.4209	0.183133
		22.4297	0.182278
		22.4385	0.181458
		22.4473	0.180773
		22.456	0.180095
		22.4648	0.179336
		22.4736	0.178616
		22.4824	0.177892
		22.4911	0.177162
		22.4999	0.176581
		22.5087	0.175998
		22.5174	0.175422
		22.5262	0.174927
		22.535	0.174463
		22.5438	0.174023
		22.5525	0.173639
		22.5613	0.173282
		22.5701	0.172844
		22.5788	0.172342
		22.5876	0.17187
		22.5964	0.171512
		22.6052	0.171185
		22.6139	0.170898
		22.6227	0.170622
		22.6315	0.170295
		22.6402	0.170059
		22.649	0.169889
		22.6578	0.169749
		22.6666	0.169585
		22.6753	0.16941
		22.6841	0.169192
		22.6929	0.168899
		22.7017	0.168733
		22.7104	0.168671
		22.7192	0.168579
		22.728	0.168477
		22.7367	0.168383
		22.7455	0.168363
		22.7543	0.168344
		22.7631	0.168291
		22.7718	0.168258
		22.7806	0.168226
		22.7894	0.168075
		22.7981	0.167992
		22.8069	0.168038
		22.8157	0.168026
		22.8245	0.168091
		22.8332	0.168171
		22.842	0.168235
		22.8508	0.168341
		22.8595	0.168416
		22.8683	0.168458
		22.8771	0.168489
		22.8859	0.168487
		22.8946	0.16848
		22.9034	0.168531
		22.9122	0.168612
		22.921	0.168714
		22.9297	0.168852
		22.9385	0.168944
		22.9473	0.169112
		22.956	0.169379
		22.9648	0.169541
		22.9736	0.169573
		22.9824	0.169611
		22.9911	0.169634
		22.9999	0.169758
		23.0087	0.170043
		23.0174	0.170181
		23.0262	0.17025
		23.035	0.170468
		23.0438	0.170727
		23.0525	0.170987
		23.0613	0.171257
		23.0701	0.171503
		23.0788	0.171674
		23.0876	0.171768
		23.0964	0.171953
		23.1052	0.172246
		23.1139	0.172504
		23.1227	0.172719
		23.1315	0.172993
		23.1403	0.173314
		23.149	0.173686
		23.1578	0.174045
		23.1666	0.174415
		23.1753	0.174736
		23.1841	0.174963
		23.1929	0.175119
		23.2017	0.175297
		23.2104	0.175736
		23.2192	0.17627
		23.228	0.176663
		23.2367	0.176999
		23.2455	0.177489
		23.2543	0.178119
		23.2631	0.17864
		23.2718	0.179137
		23.2806	0.179664
		23.2894	0.180021
		23.2981	0.180457
		23.3069	0.181085
		23.3157	0.181688
		23.3245	0.182324
		23.3332	0.182988
		23.342	0.183661
		23.3508	0.184446
		23.3596	0.185269
		23.3683	0.185959
		23.3771	0.186651
		23.3859	0.187338
		23.3946	0.187944
		23.4034	0.18872
		23.4122	0.189549
		23.421	0.190375
		23.4297	0.191207
		23.4385	0.191969
		23.4473	0.192963
		23.456	0.194045
		23.4648	0.195026
		23.4736	0.19599
		23.4824	0.196848
		23.4911	0.197601
		23.4999	0.198461
		23.5087	0.199531
		23.5174	0.20059
		23.5262	0.201629
		23.535	0.202688
		23.5438	0.203727
		23.5525	0.204892
		23.5613	0.206135
		23.5701	0.207243
		23.5789	0.208232
		23.5876	0.209172
		23.5964	0.210105
		23.6052	0.21116
		23.6139	0.212357
		23.6227	0.213565
		23.6315	0.214755
		23.6403	0.215925
		23.649	0.217174
		23.6578	0.218465
		23.6666	0.219663
		23.6753	0.220838
		23.6841	0.222009
		23.6929	0.223016
		23.7017	0.223974
		23.7104	0.225163
		23.7192	0.226429
		23.728	0.227643
		23.7367	0.228834
		23.7455	0.230095
		23.7543	0.231426
		23.7631	0.232642
		23.7718	0.233784
		23.7806	0.234914
		23.7894	0.235933
		23.7982	0.236927
		23.8069	0.238059
		23.8157	0.239227
		23.8245	0.240326
		23.8332	0.241391
		23.842	0.242476
		23.8508	0.243614
		23.8596	0.244779
		23.8683	0.24586
		23.8771	0.246893
		23.8859	0.247794
		23.8946	0.24858
		23.9034	0.249514
		23.9122	0.250517
		23.921	0.251551
		23.9297	0.25252
		23.9385	0.253417
		23.9473	0.254503
		23.956	0.255638
		23.9648	0.256648
		23.9736	0.257613
		23.9824	0.258485
		23.9911	0.259229
		23.9999	0.259976
		24.0087	0.260893
		24.0175	0.261881
		24.0262	0.263838
		24.035	0.26604
		24.0438	0.267295
		24.0525	0.268333
		24.0613	0.269282
		24.0701	0.270265
		24.0789	0.271169
		24.0876	0.271857
		24.0964	0.27261
		24.1052	0.273511
		24.1139	0.274444
		24.1227	0.275379
		24.1315	0.2763
		24.1403	0.277244
		24.149	0.278259
		24.1578	0.279398
		24.1666	0.280468
		24.1753	0.28143
		24.1841	0.282386
		24.1929	0.283283
		24.2017	0.284247
		24.2104	0.285365
		24.2192	0.286527
		24.228	0.287702
		24.2368	0.288864
		24.2455	0.290086
		24.2543	0.291439
		24.2631	0.292792
		24.2718	0.294133
		24.2806	0.295405
		24.2894	0.296545
		24.2982	0.297745
		24.3069	0.299137
		24.3157	0.300659
		24.3245	0.302191
		24.3332	0.30369
		24.342	0.305245
		24.3508	0.306915
		24.3596	0.308629
		24.3683	0.310353
		24.3771	0.312079
		24.3859	0.313611
		24.3946	0.315098
		24.4034	0.31677
		24.4122	0.318511
		24.421	0.320391
		24.4297	0.322322
		24.4385	0.324149
		24.4473	0.326063
		24.4561	0.328105
		24.4648	0.33015
		24.4736	0.332105
		24.4824	0.334036
		24.4911	0.335892
		24.4999	0.337711
		24.5087	0.339706
		24.5175	0.341826
		24.5262	0.343854
		24.535	0.345839
		24.5438	0.347914
		24.5525	0.350048
		24.5613	0.352204
		24.5701	0.354259
		24.5789	0.356198
		24.5876	0.358014
		24.5964	0.359808
		24.6052	0.361733
		24.6139	0.363684
		24.6227	0.365675
		24.6315	0.367632
		24.6403	0.369471
		24.649	0.371384
		24.6578	0.373376
		24.6666	0.375278
		24.6754	0.377066
		24.6841	0.378714
		24.6929	0.38021
		24.7017	0.381775
		24.7104	0.383413
		24.7192	0.385036
		24.728	0.386608
		24.7368	0.388006
		24.7455	0.389435
		24.7543	0.390998
		24.7631	0.392471
		24.7718	0.39376
		24.7806	0.394959
		24.7894	0.396046
		24.7982	0.397025
		24.8069	0.398061
		24.8157	0.399119
		24.8245	0.400098
		24.8332	0.401029
		24.842	0.401893
		24.8508	0.402758
		24.8596	0.403617
		24.8683	0.404288
		24.8771	0.40482
		24.8859	0.405248
		24.8947	0.405603
		24.9034	0.405974
		24.9122	0.406328
		24.921	0.406659
		24.9297	0.406923
		24.9385	0.406992
		24.9473	0.407043
		24.9561	0.407063
		24.9648	0.407035
		24.9736	0.407006
		24.9824	0.406754
		24.9911	0.406358
		24.9999	0.406006
		25.0087	0.405652
		25.0175	0.405189
		25.0262	0.404657
		25.035	0.404061
		25.0438	0.403461
		25.0525	0.402868
		25.0613	0.40209
		25.0701	0.401218
		25.0789	0.400355
		25.0876	0.399345
		25.0964	0.398333
		25.1052	0.397404
		25.114	0.39633
		25.1227	0.395175
		25.1315	0.394017
		25.1403	0.39283
		25.149	0.391639
		25.1578	0.390309
		25.1666	0.388887
		25.1754	0.387483
		25.1841	0.386059
		25.1929	0.38452
		25.2017	0.383016
		25.2104	0.381532
		25.2192	0.380062
		25.228	0.378513
		25.2368	0.376791
		25.2455	0.375174
		25.2543	0.373599
		25.2631	0.371889
		25.2718	0.370141
		25.2806	0.368366
		25.2894	0.366552
		25.2982	0.364816
		25.3069	0.363164
		25.3157	0.361484
		25.3245	0.359695
		25.3333	0.357871
		25.342	0.356168
		25.3508	0.354423
		25.3596	0.35265
		25.3683	0.350921
		25.3771	0.349107
		25.3859	0.347247
		25.3947	0.345468
		25.4034	0.343778
		25.4122	0.342079
		25.421	0.340375
		25.4297	0.338618
		25.4385	0.336908
		25.4473	0.335328
		25.4561	0.333747
		25.4648	0.332036
		25.4736	0.330367
		25.4824	0.328771
		25.4911	0.327194
		25.4999	0.325741
		25.5087	0.324281
		25.5175	0.322863
		25.5262	0.321449
		25.535	0.320001
		25.5438	0.318718
		25.5526	0.317465
		25.5613	0.31615
		25.5701	0.314894
		25.5789	0.313771
		25.5876	0.312585
		25.5964	0.311365
		25.6052	0.310359
		25.614	0.309411
		25.6227	0.30848
		25.6315	0.307564
		25.6403	0.306692
		25.649	0.305935
		25.6578	0.30518
		25.6666	0.304461
		25.6754	0.303785
		25.6841	0.303024
		25.6929	0.302301
		25.7017	0.301777
		25.7104	0.301372
		25.7192	0.301027
		25.728	0.300651
		25.7368	0.30027
		25.7455	0.300027
		25.7543	0.299897
		25.7631	0.299764
		25.7719	0.299592
		25.7806	0.299524
		25.7894	0.299463
		25.7982	0.299391
		25.8069	0.299472
		25.8157	0.299697
		25.8245	0.299955
		25.8333	0.30023
		25.842	0.300538
		25.8508	0.300917
		25.8596	0.301423
		25.8683	0.301952
		25.8771	0.302477
		25.8859	0.302931
		25.8947	0.303392
		25.9034	0.303992
		25.9122	0.304707
		25.921	0.305428
		25.9297	0.30618
		25.9385	0.306987
		25.9473	0.307792
		25.9561	0.308757
		25.9648	0.309742
		25.9736	0.310646
		25.9824	0.311501
		25.9912	0.312303
		25.9999	0.313158
		26.0087	0.314116
		26.0175	0.31522
		26.0262	0.316297
		26.035	0.317319
		26.0438	0.318383
		26.0526	0.319459
		26.0613	0.320512
		26.0701	0.321524
		26.0789	0.322553
		26.0876	0.323479
		26.0964	0.324283
		26.1052	0.325166
		26.114	0.32614
		26.1227	0.32714
		26.1315	0.328165
		26.1403	0.329068
		26.149	0.329962
		26.1578	0.330882
		26.1666	0.331773
		26.1754	0.332586
		26.1841	0.33324
		26.1929	0.333867
		26.2017	0.334414
		26.2105	0.335007
		26.2192	0.33573
		26.228	0.33635
		26.2368	0.336801
		26.2455	0.337242
		26.2543	0.337802
		26.2631	0.338293
		26.2719	0.338584
		26.2806	0.338743
