# Supplementary material for: Multivalency, autoinhibition, and protein disorder in the regulation of interactions of dynein intermediate chain with dynactin and the nuclear distribution protein
Source: eLife journal article supplement (doi:10.7554/elife.80217), 2022-11-23
Supplement: fig4-data1 [file Figure 4-source data 1.xlsx]

## Sheet: NMR Peak Volumes
IC260 TROSY 10C					IC260 CLEANEX 10C
Residue	Height	Volume	Assign F1		Residue	Height	Volume	Assign F1
29	0.045	0.0547	29AlaH		29	0.0239	0.0198	29AlaH
30	0.0994	0.1154	30AlaH		30	0.0443	0.0337	30AlaH
31	0.0559	0.0628	31GlyH		31	0.0609	0.0561	31GlyH
32	0.0865	0.1138	32ArgH		32	0.0756	0.0696	32ArgH
39	0.3114	0.3978	39LeuH		39	0.0607	0.0611	39LeuH
40	0.1879	0.2189	40ValH		40	0.0104	0.013	40ValH
41	0.1307	0.1619	41SerH		41	0.057	0.0588	41SerH
66	0.034	0.0425	66GlyH		66	0.0114	0.0142	66GlyH
67	0.1225	0.156	66GlyH		67	0.0573	0.0566	67AlaH
73	0.0441	0.06	73GlyH		73	0.1599	0.1805	73GlyH
74	0.0959	0.1511	74SerH		74	0.3352	0.4249	74SerH
77	0.0864	0.1058	77AsnH		77	0.2567	0.203	77AsnH
78	0.1443	0.2898	78SerH		78	0.6552	0.662	78SerH
79	0.5411	0.7394	79ValH		80	0.0389	0.0392	80IleH
80	0.5516	0.6295	80IleH		81	0.3345	0.23	81SerH
81	0.219	0.235	81SerH		82	0.5099	0.4081	82ThrH
82	0.3025	0.3807	82ThrH		83	0.3705	0.2548	83GlyH
83	0.2962	0.2478	83GlyH		84	0.2684	0.2049	84GluH
84	0.4751	0.6423	84GluH		85	0.2961	0.3313	85LeuH
85	0.7582	0.9435	85LeuH		86	0.4566	0.3087	86SerH
86	0.2807	0.298	86SerH		87	0.4315	0.424	87ThrH
87	0.3048	0.2941	87ThrH		88	0.3184	0.2226	88AspH
88	0.442	0.4286	88AspH		89	0.3256	0.2614	89AsnH
89	0.2767	0.2869	89AsnH		90	0.3374	0.2611	90AlaH
90	0.386	0.4247	90AlaH		91	0.3286	0.2182	91SerH
91	0.4092	0.3851	91SerH		92	0.2475	0.2173	92GluH
92	0.5492	0.6818	92GluH		93	0.1016	0.168	93IleH
93	0.9742	0.9349	93IleH		94	0.2072	0.157	94ThrH
94	0.4437	0.4311	94ThrH		95	0.3459	0.2335	95AlaH
95	0.3318	0.3391	95AlaH		96	0.4298	0.303	96ThrH
96	0.2396	0.2473	96ThrH		97	1	1	97ThrH
97	0.2803	0.4625	97ThrH		98	0.8515	0.8811	98ThrH
98	0.3255	0.5477	98ThrH		99	0.3635	0.3062	99GlyH
99	0.1774	0.1728	99GlyH		100	0.3151	0.2381	100GlnH
100	0.3347	0.3316	100GlnH		101	0.0724	0.0566	101LeuH
101	0.5193	0.5497	101LeuH		103	0.2378	0.2396	103SerH
103	0.1777	0.2152	103SerH		104	0.2374	0.2427	104GlnH
104	0.152	0.398	104GlnH		106	0.1237	0.1262	106GlnH
106	0.4622	0.5164	106GlnH		108	0.2074	0.2084	108LeuH
108	0.6005	0.8047	108LeuH		109	0.4776	0.5806	109SerH
109	0.2259	0.3963	109SerH		110	0.5866	0.8265	110ThrH
110	0.0554	0.0783	110ThrH		111	0.117	0.1118	111ValH
111	0.6748	0.5711	111ValH		113	0.1133	0.1564	113LeuH
113	0.6977	1	113LeuH		114	0.123	0.1618	114GlnH
114	0.2286	0.5077	114GlnH		115	0.2304	0.2061	115ThrH
115	0.1804	0.1864	115ThrH		116	0.0266	0.0373	116ValH
116	0.3056	0.3617	116ValH		117	0.0635	0.0524	117TyrH
117	0.2327	0.2468	117TyrH		118	0.1079	0.1053	118GluH
118	0.2074	0.2295	118GluH		122	0.2261	0.2536	122SerH
122	0.2589	0.2984	122SerH		125	0.0895	0.0641	125LysH
124	0.4511	0.4853	124ValH		126	0.2344	0.2945	126GluH
125	0.3678	0.3914	125LysH		127	0.2757	0.2824	127IleH
126	0.3208	0.6913	126GluH		128	0.0333	0.0263	128IleH
127	0.6533	0.6751	127IleH		129	0.2816	0.1935	129SerH
128	0.5913	0.5493	128IleH		130	0.396	0.3786	130TyrH
129	0.2142	0.2401	129SerH		131	0.3968	0.3482	131SerH
130	0.2543	0.273	130TyrH		132	0.0843	0.1882	132LysH
131	0.0822	0.0836	131SerH		133	0.3931	0.2685	133GlyH
132	0.2512	0.263	132LysH		134	0.1171	0.0998	134ValH
133	0.1775	0.1806	133GlyH		135	0.1743	0.1455	135GlnH
134	0.5034	0.5481	134ValH		136	0.6429	0.58	136ThrH
135	0.3114	0.3465	135GlnH		137	0.5866	0.8265	137ThrH
136	0.364	0.4558	136ThrH		138	0.1804	0.1697	138GluH
137	0.2732	0.5149	137ThrH		139	0.0967	0.1036	139GluH
138	0.3988	0.4405	138GluH		140	0.1483	0.1885	140TrpH
139	0.4462	0.4745	139GluH		141	0.0689	0.06	141ThrH
140	0.4393	0.5356	140TrpH		145	0.3219	0.3024	145SerH
141	0.3753	0.3288	141ThrH		146	0.2789	0.2134	146ArgH
145	0.1026	0.1988	145SerH		147	0.3013	0.2038	147GlyH
146	0.1363	0.1616	146ArgH		148	0.1573	0.1227	148ValH
147	0.2717	0.2554	147GlyH		149	0.2306	0.1722	149GlyH
148	0.7117	0.6002	148ValH		150	0.2192	0.1633	150AspH
149	0.3946	0.3167	149GlyH		151	0.3244	0.2996	151SerH
150	0.4328	0.4218	150AspH		152	0.2711	0.2341	152AspH
151	0.3809	0.4381	151SerH		153	0.1572	0.2017	153AspH
152	0.5112	0.6529	152AspH		154	0.0702	0.0649	154GluH
153	0.6036	0.6066	153AspH		155	0.0738	0.1179	155AspH
154	0.7041	0.7043	154GluH		156	0.272	0.217	156LeuH
155	0.7241	0.8073	155AspH		157	0.1217	0.0787	157GlyH
156	0.5165	0.5971	156LeuH		158	0.2744	0.1999	158AlaH
157	0.5394	0.4288	157GlyH		159	0.3034	0.2399	159AlaH
158	0.33	0.3515	158AlaH		160	0.1982	0.1389	160AlaH
159	0.7057	0.849	159AlaH		161	0.3994	0.6902	161SerH
160	0.3114	0.3978	160AlaH		256	0.2293	0.241	256GlnH
161	0.2491	0.292	161SerH		257	0.0244	0.0244	257ValH
256	0.149	0.1747	256GlnH		258	0.2254	0.3244	258HisH
257	0.2504	0.3456	257ValH		259	0.1736	0.1977	259AspH
258	0.32	0.45	258HisH
259	0.2979	0.4926	259AspH
260	1	0.7058	260ValH
