# Supplementary material for: Multivalency, autoinhibition, and protein disorder in the regulation of interactions of dynein intermediate chain with dynactin and the nuclear distribution protein
Source: eLife journal article supplement (doi:10.7554/elife.80217), 2022-11-23
Supplement: fig5-data1 [file Figure 5-source data 4.xlsx]

## Sheet: NMR Peak Volumes
						Data for Figure 4 C									Data for Figure 4 E
Residue	IC88 Height	IC88 Volume	IC88+H3 Height	IC88+H3 Volume	IC88+IC100-260 Height	IC88+IC100-260 Volume			Residue	IC88 Height	IC88 Volume	IC88+IC216-260 Height	IC88+IC216-260 Volume		Residue	IC216-260 Height	IC216-260 Volume	IC216-260+IC88 Height	IC216-260+IC88 Volume
1	0.443	0.38	0.341	0.365	NaN	NaN			3	0.127	0.126	0.065	0.064		217	0.686	0.658	0.265	0.301
2	0.548	0.52	0.374	0.455	NaN	NaN			4	0.143	0.148	0.073	0.077		218	0.827	0.859	0.436	0.505
3	0.627	0.534	0.365	0.429	NaN	NaN			6	0.119	0.129	0.013	0.014		219	0.793	1	0.259	0.43
4	0.604	0.53	0.326	0.375	NaN	NaN			7	0.195	0.222	0.083	0.107		220	0.95	0.917	0.335	0.401
5	0.574	0.487	0.302	0.352	NaN	NaN			8	0.177	0.189	0.196	0.219		221	1	0.902	0.164	0.246
6	0.568	0.496	0.282	0.324	NaN	NaN			9	0.227	0.236	0.042	0.054		222	0.933	0.858	0.118	0.251
7	0.653	0.622	0.322	0.411	NaN	NaN			10	0.221	0.232	0.135	0.139		223	0.397	0.409	0.049	0.074
8	0.702	0.636	0.381	0.475	NaN	NaN			11	0.302	0.322	0.191	0.222		224	0.258	0.286	0.006	0.01
9	0.815	0.77	0.404	0.49	NaN	NaN			12	0.188	0.199	0.032	0.035		225	0.119	0.139	0.065	0.1
10	0.721	0.637	0.486	0.526	NaN	NaN			13	0.222	0.227	0.18	0.187		226	0.576	0.601	0.035	0.062
11	0.463	0.604	0.257	0.443	NaN	NaN			14	0.396	0.422	0.307	0.338		227	0.717	0.735	0.018	0.034
12	0.709	0.654	0.36	0.42	NaN	NaN			15	0.241	0.26	0.188	0.203		228	0.586	0.593	0.113	0.165
13	0.755	0.748	0.41	0.489	NaN	NaN			16	0.253	0.265	0.059	0.067		229	0.411	0.483	0.026	0.044
14	0.74	0.669	0.388	0.448	NaN	NaN			17	0.268	0.273	0.154	0.156		230	0.773	0.844	0.068	0.112
15	0.752	0.788	0.266	0.426	NaN	NaN			18	0.213	0.232	0.101	0.099		231	0.649	0.648	0.093	0.142
16	0.719	0.64	0.281	0.353	NaN	NaN			19	0.221	0.223	0.03	0.033		232	0.824	0.737	0.016	0.026
17	0.999	0.952	0.412	0.514	NaN	NaN			20	0.264	0.274	0.145	0.156		233	0.475	0.514	0.087	0.128
18	0.355	0.418	0.153	0.232	0.113	0.147			22	0.31	0.331	0.161	0.175		234	0.179	0.214	0.018	0.03
19	0.284	0.36	0.126	0.198	NaN	NaN			23	0.315	0.347	0.202	0.217		235	0.107	0.127	0.004	0.005
20	0.758	0.655	0.423	0.468	NaN	NaN			24	0.301	0.307	0.133	0.148		236	0.096	0.114	0.008	0.014
21	0.639	0.56	0.262	0.314	NaN	NaN			25	0.259	0.262	0.157	0.152		237	0.263	0.302	0.013	0.02
22	0.542	0.65	0.133	0.27	NaN	NaN			26	0.289	0.292	0.181	0.168		238	0.64	0.644	0.009	0.014
23	0.91	0.903	0.524	0.638	NaN	NaN			27	0.275	0.275	0.168	0.176		239	0.68	0.717	0.005	0.006
24	0.727	0.674	0.386	0.476	NaN	NaN			28	0.289	0.3	0.185	0.201		240	0.502	0.57	-0.003	0
25	0.772	0.675	0.489	0.529	NaN	NaN			29	0.256	0.261	0.176	0.177		241	0.516	0.553	0.014	0.029
26	0.875	0.733	0.544	0.592	NaN	NaN			30	0.314	0.293	0.187	0.18		242	0.55	0.565	-0.003	0
27	0.794	0.71	0.616	0.66	0.06	0.079			31	0.11	0.114	0.098	0.089		243	0.694	0.813	0.022	0.042
28	0.422	0.523	0.291	0.454	0.066	0.085			32	0.208	0.199	0.162	0.156		244	0.598	0.687	0.011	0.019
29	0.791	0.678	0.582	0.633	NaN	NaN			33	0.058	0.062	0.042	0.043		245	0.626	0.649	0.01	0.019
30	0.825	0.712	0.617	0.67	0.15	0.184			34	0.429	0.386	0.55	0.494		246	0.589	0.624	0.024	0.047
31	0.616	0.535	0.505	0.545	0.059	0.071			37	0.14	0.137	0.063	0.077		247	0.718	0.749	0.061	0.118
32	0.8	0.681	0.607	0.658	0.165	0.2			39	0.602	0.54	0.328	0.341		248	0.535	0.581	0.071	0.16
33	0.537	0.48	0.451	0.503	NaN	NaN			40	0.598	0.579	0.198	0.283		249	0.988	0.965	0.032	0.062
34	0.87	0.776	0.755	0.819	0.249	0.297			41	0.34	0.334	0.261	0.258		250	0.786	0.827	0.085	0.13
35	0.941	0.821	0.671	0.747	0.203	0.225			43	0.265	0.261	0.216	0.206		251	0.526	0.552	0.012	0.031
37	0.673	0.572	0.499	0.553	0.202	0.231			48	0.223	0.23	0.129	0.134		252	0.494	0.464	0.164	0.233
38	0.798	0.684	0.647	0.71	0.239	0.283			49	0.048	0.048	0.022	0.031		253	0.546	0.589	0.131	0.195
39	0.99	1	0.684	0.768	0.186	0.233			51	0.075	0.082	0.123	0.133		254	0.524	0.545	0.137	0.189
40	0.935	0.861	0.618	0.689	0.233	0.273			52	0.099	0.107	0.064	0.075		255	0.733	0.764	0.194	0.255
41	0.947	0.884	0.74	0.876	0.352	0.465			53	0.362	0.353	0.178	0.197		256	0.599	0.618	0.181	0.256
43	0.64	0.568	0.541	0.594	0.093	0.126			54	0.185	0.194	0.086	0.08		257	0.528	0.552	0.041	0.07
45	0.375	0.339	0.339	0.359	0.06	0.074			55	0.082	0.086	0.013	0.02		258	0.718	0.73	0.034	0.062
46	0.276	0.261	0.17	0.208	NaN	NaN			56	0.109	0.103	0.032	0.034		259	0.255	0.279	0.134	0.178
47	0.462	0.403	0.284	0.326	NaN	NaN			57	0.2	0.2	0.038	0.039		260	0.759	0.8	1	1
48	0.307	0.277	0.22	0.257	NaN	NaN			58	0.091	0.112	0.026	0.032		NaN	NaN	NaN	NaN	NaN
49	0.282	0.288	NaN	NaN	NaN	NaN			59	0.157	0.158	0.033	0.039		NaN	NaN	NaN	NaN	NaN
50	0.459	0.405	0.212	0.247	NaN	NaN			60	0.301	0.296	0.1	0.113		NaN	NaN	NaN	NaN	NaN
51	0.517	0.476	NaN	NaN	NaN	NaN			61	0.082	0.093	0.012	0.016		NaN	NaN	NaN	NaN	NaN
52	0.404	0.393	NaN	NaN	NaN	NaN			62	0.054	0.054	0.017	0.025		NaN	NaN	NaN	NaN	NaN
53	0.909	0.85	0.279	0.334	NaN	NaN			63	0.03	0.029	0.019	0.027		NaN	NaN	NaN	NaN	NaN
54	0.575	0.552	0.082	0.153	NaN	NaN			64	0.021	0.033	0.021	0.027		NaN	NaN	NaN	NaN	NaN
55	0.198	0.238	NaN	NaN	NaN	NaN			65	0.054	0.057	0.053	0.049		NaN	NaN	NaN	NaN	NaN
56	0.472	0.432	NaN	NaN	NaN	NaN			66	0.071	0.066	0.056	0.053		NaN	NaN	NaN	NaN	NaN
57	0.611	0.57	NaN	NaN	NaN	NaN			67	0.067	0.067	0.06	0.062		NaN	NaN	NaN	NaN	NaN
58	0.412	0.4	NaN	NaN	NaN	NaN			69	0.071	0.068	0.045	0.043		NaN	NaN	NaN	NaN	NaN
59	0.589	0.523	0.183	0.218	0.064	0.088			71	0.408	0.368	0.303	0.286		NaN	NaN	NaN	NaN	NaN
60	0.547	0.533	0.158	0.196	0.086	0.106			72	0.272	0.264	0.216	0.207		NaN	NaN	NaN	NaN	NaN
61	0.329	0.333	NaN	NaN	NaN	NaN			74	0.057	0.061	0.047	0.049		NaN	NaN	NaN	NaN	NaN
62	0.429	0.43	NaN	NaN	0.171	0.229			78	0.037	0.045	0.045	0.049		NaN	NaN	NaN	NaN	NaN
63	0.153	0.154	0.09	0.111	NaN	NaN			79	0.462	0.396	0.427	0.363		NaN	NaN	NaN	NaN	NaN
64	0.239	0.223	NaN	NaN	NaN	NaN			80	0.82	0.682	0.84	0.659		NaN	NaN	NaN	NaN	NaN
65	0.449	0.401	0.266	0.308	NaN	NaN			81	0.099	0.098	0.094	0.091		NaN	NaN	NaN	NaN	NaN
66	0.517	0.443	0.375	0.406	0.108	0.129			82	0.088	0.104	0.098	0.109		NaN	NaN	NaN	NaN	NaN
67	0.541	0.451	0.451	0.479	NaN	NaN			83	0.135	0.132	0.154	0.138		NaN	NaN	NaN	NaN	NaN
68	0.318	0.288	0.225	0.275	NaN	NaN			84	0.526	0.483	0.556	0.521		NaN	NaN	NaN	NaN	NaN
69	0.392	0.34	0.315	0.342	0.198	0.218			85	0.913	0.788	0.951	0.83		NaN	NaN	NaN	NaN	NaN
71	0.975	0.913	0.549	0.712	0.336	0.434			86	0.313	0.286	0.327	0.285		NaN	NaN	NaN	NaN	NaN
72	0.369	0.333	0.278	0.337	0.215	0.24			87	0.342	0.323	0.373	0.343		NaN	NaN	NaN	NaN	NaN
73	0.286	0.258	0.257	0.285	0.18	0.21			88	1	1	1	1		NaN	NaN	NaN	NaN	NaN
74	0.32	0.34	0.305	0.378	0.269	0.317
75	0.512	0.53	0.341	0.391	0.373	0.404
77	0.359	0.314	0.35	0.368	0.299	0.321
78	0.652	0.593	0.341	0.372	0.28	0.312
79	0.763	0.696	0.675	0.773	0.676	0.694
80	0.936	0.821	0.945	0.99	0.868	0.87
81	0.531	0.462	0.536	0.562	0.483	0.507
82	0.578	0.582	0.498	0.649	0.387	0.464
83	0.587	0.494	0.569	0.584	0.544	0.556
84	0.92	0.767	0.942	0.958	0.89	0.872
85	0.99	0.835	0.941	0.991	1	1
86	0.819	0.688	0.708	0.781	0.812	0.792
87	0.715	0.706	0.665	0.824	0.639	0.732
88	1	0.827	1	1	0.948	0.952
