# Supplementary material for: Multivalency, autoinhibition, and protein disorder in the regulation of interactions of dynein intermediate chain with dynactin and the nuclear distribution protein
Source: eLife journal article supplement (doi:10.7554/elife.80217), 2022-11-23
Supplement: fig6-data1 [file Figure 6-source data 1.xlsx]

## Sheet: SV-AUC
S	p150CC1B	p150CC1B/IC88	IC + LC8	NudECC	NudECC/IC88
0	0.0023	0.00433	0.00642	0.00756	1.93e-14
0.152	0.284	2.25	0.187	1.8	5.27e-12
0.303	0.0326	0.0803	3.4e-05	0.053	0.000214
0.455	0.00101	5.92e-05	3.92e-10	1.83e-05	0.54
0.606	5.2e-06	4.14e-10	1.89e-14	2.71e-10	0.334
0.758	6.29e-09	2.28e-14	5.08e-14	5.63e-14	0.000514
0.909	5.24e-12	5.99e-14	5.22e-14	9.88e-15	2.79e-08
1.06	3.81e-14	1.3e-14	8.73e-15	1.18e-14	6.81e-13
1.21	1.61e-14	1.68e-14	7.66e-15	1.32e-14	2.54e-14
1.36	1.65e-14	4.43e-14	5.86e-14	1.22e-14	4.86e-14
1.52	2.17e-14	5.89e-14	5.15e-14	1.08e-14	1.23e-14
1.67	1.94e-11	1.04e-14	6.56e-15	1.39e-14	3.43e-14
1.82	8.97e-08	1.42e-14	1.36e-06	1.88e-14	8.3e-15
1.97	0.000356	6.02e-14	0.0023	1.16e-09	5.17e-14
2.12	0.184	2.64e-14	0.308	0.000215	7.79e-10
2.27	2.45	1.95e-14	2.54	0.692	8.87e-06
2.42	0.287	3.08e-14	1.98	7.24	0.0175
2.58	0.0002	9.3e-15	0.361	0.117	1.81
2.73	1.13e-09	8.55e-13	0.0448	3.86e-06	4.9
2.88	4.94e-14	4.87e-09	0.00897	4.77e-14	0.296
3.03	2.15e-14	3.95e-06	0.00471	3.99e-14	0.000521
3.18	4.52e-14	0.000575	0.00685	3.55e-14	4.99e-08
3.33	2.78e-14	0.0199	0.0213	1.46e-14	5.85e-13
3.48	4.63e-14	0.209	0.092	2.67e-14	3.02e-14
3.64	1.75e-14	0.809	0.355	5.9e-14	5.77e-14
3.79	1.09e-14	1.28	0.863	3.56e-14	4.35e-14
3.94	1.25e-14	0.858	1.07	5.26e-14	8.15e-15
4.09	2.26e-14	0.24	0.651	1.47e-14	3.97e-14
4.24	5.44e-14	0.0305	0.201	1.03e-14	3.32e-14
4.39	1.79e-14	0.00176	0.0401	1.85e-14	4.32e-14
4.55	7.22e-15	5.01e-05	0.00604	5.93e-14	8.01e-15
4.7	4.29e-14	8.04e-07	0.000864	2.3e-14	2.55e-14
4.85	3.26e-14	8.69e-09	0.000141	1.25e-14	1.15e-14
5	3.13e-14	7.74e-11	3.04e-05	8.6e-15	7.9e-15
5.15	3.64e-14	7e-13	9.39e-06	6.95e-15	8.24e-15
5.3	4.86e-14	3.73e-14	4.33e-06	6.3e-14	1.2e-14
5.45	7.1e-15	4.18e-14	2.96e-06	3.63e-14	2.14e-14
5.61	1.21e-14	3.55e-14	2.88e-06	3.43e-14	4.25e-14
5.76	2.1e-14	5.9e-14	3.72e-06	2.64e-14	8.91e-15
5.91	3.64e-14	1.36e-14	6.08e-06	2.39e-14	2.15e-14
6.06	6.22e-14	5.22e-14	1.14e-05	2.37e-14	4.9e-14
6.21	1.04e-14	2.72e-14	2.33e-05	2.5e-14	1.05e-14
6.36	1.96e-14	1.9e-14	4.81e-05	2.77e-14	2.6e-14
6.52	3.53e-14	1.81e-14	9.56e-05	4.62e-14	5.84e-14
6.67	6.08e-14	2.25e-14	0.000175	7.77e-15	1.2e-14
6.82	1.01e-14	3.43e-14	0.000282	1.64e-14	2.89e-14
6.97	1.89e-14	5.97e-14	0.00039	3.16e-14	6.22e-14
7.12	3.36e-14	1.11e-14	0.000459	2.35e-13	1.23e-14
7.27	5.67e-14	2.76e-14	0.000457	8.03e-12	2.83e-14
7.42	9.16e-15	6.59e-14	0.000387	1.87e-10	5.88e-14
7.58	1.69e-14	1.51e-14	0.000289	3.08e-09	1.26e-14
7.73	2.93e-14	4.53e-14	0.000197	3.66e-08	2.73e-14
7.88	4.82e-14	1.31e-14	0.000126	3.2e-07	5.41e-14
8.03	7.61e-15	4.31e-14	7.81e-05	2.11e-06	9.97e-15
8.18	1.37e-14	1.2e-14	4.98e-05	1.08e-05	2.14e-14
8.33	2.32e-14	4.24e-14	3.36e-05	4.35e-05	4.18e-14
8.48	3.74e-14	1.86e-14	2.5e-05	0.000142	7.6e-15
8.64	5.78e-14	6.51e-14	2.05e-05	0.000381	1.6e-14
8.79	8.64e-15	9.23e-15	1.93e-05	0.000863	3.09e-14
8.94	1.47e-14	8.96e-14	2.06e-05	0.00168	5.56e-14
9.09	2.37e-14	2.95e-13	2.52e-05	0.00286	9.47e-15
9.24	3.67e-14	9.23e-13	3.42e-05	0.00433	1.88e-14
9.39	5.47e-14	2.76e-12	5.15e-05	0.00593	3.46e-14
9.55	7.92e-15	7.92e-12	8.25e-05	0.00743	5.97e-14
9.7	1.3e-14	2.17e-11	0.000137	0.00862	9.84e-15
9.85	2.03e-14	5.75e-11	0.000231	0.00941	1.89e-14
10	3.06e-14	1.46e-10	0.000381	0.00968	3.39e-14
10.2	4.46e-14	3.55e-10	0.000604	0.0095	5.76e-14
10.3	6.33e-14	8.35e-10	0.000892	0.00903	9.59e-15
10.5	8.77e-15	1.88e-09	0.0012	0.00829	1.81e-14
10.6	1.37e-14	4.06e-09	0.00146	0.00742	3.19e-14
10.8	2.05e-14	8.45e-09	0.0016	0.00653	5.36e-14
10.9	2.98e-14	1.7e-08	0.00156	0.00566	8.61e-15
11.1	4.2e-14	3.25e-08	0.00138	0.00485	1.61e-14
11.2	5.8e-14	6.03e-08	0.00109	0.00414	2.82e-14
11.4	7.84e-15	1.07e-07	0.000794	0.00354	4.7e-14
11.5	1.19e-14	1.82e-07	0.000533	0.00302	7.5e-15
11.7	1.73e-14	2.97e-07	0.000339	0.0026	1.39e-14
11.8	2.46e-14	4.63e-07	0.000208	0.00227	2.4e-14
12	3.42e-14	6.93e-07	0.000125	0.002	3.96e-14
12.1	4.65e-14	9.91e-07	7.54e-05	0.00179	6.26e-14
12.3	6.2e-14	1.36e-06	4.65e-05	0.00163	9.55e-15
12.4	8.15e-15	1.79e-06	2.97e-05	0.00153	1.69e-14
12.6	1.19e-14	2.26e-06	1.99e-05	0.00146	2.82e-14
12.7	1.69e-14	2.72e-06	1.41e-05	0.00144	4.51e-14
12.9	2.35e-14	3.19e-06	1.08e-05	0.00147	8.29e-15
13	3.18e-14	3.62e-06	8.88e-06	0.00154	1.43e-14
13.2	4.24e-14	3.95e-06	7.85e-06	0.00168	2.34e-14
13.3	5.55e-14	4.22e-06	7.51e-06	0.0019	3.7e-14
13.5	7.15e-15	4.4e-06	7.76e-06	0.00224	6.46e-14
13.6	1.02e-14	4.47e-06	8.6e-06	0.00276	7.44e-14
13.8	1.41e-14	4.47e-06	1.02e-05	0.00354	1.34e-13
13.9	1.92e-14	4.31e-06	1.3e-05	0.00478	2.34e-13
14.1	2.55e-14	4.15e-06	1.76e-05	0.00676	4.05e-13
14.2	3.33e-14	3.9e-06	2.53e-05	0.00998	6.95e-13
14.4	4.3e-14	3.65e-06	3.8e-05	0.0155	1.17e-12
14.5	5.46e-14	3.4e-06	6e-05	0.0252	1.95e-12
14.7	6.85e-15	3.11e-06	9.7e-05	0.0433	3.19e-12
14.8	9.44e-15	2.87e-06	0.000164	0.0776	5.15e-12
15	2.55e-14	5.31e-06	0.000552	0.291	1.66e-11

## Sheet: NMR Peak Volumes
	15N CTIC + p150abc (1:1)		15N CTIC + NudEcc (1:1)				CT-IC 37-88:CT-p150abc (1:1)		CT-IC 37-88:CT-NudE (1:1)
Residue	Volume Ratio	Error	Volume Ratio	Error		Residue	Volume Ratio	Error	Volume Ratio	Error
0	NaN	NaN	NaN	NaN		35	0	0	0	0
1	NaN	NaN	NaN	NaN		36	0	0	0	0
2	NaN	NaN	NaN	NaN		37	0	0	0	0
3	NaN	NaN	NaN	NaN		38	0	0	0	0
4	NaN	NaN	NaN	NaN		39	0.408816	0.00429547	0.796312	0.00247664
5	NaN	NaN	NaN	NaN		40	0.505643	0.00706341	0.983763	0.00403271
6	NaN	NaN	NaN	NaN		41	0.395676	0.00858293	0.950469	0.00524727
7	NaN	NaN	NaN	NaN		42	NaN	NaN	NaN	NaN
8	NaN	NaN	NaN	NaN		43	0.133641	0.00911467	0.970561	0.00617142
9	NaN	NaN	NaN	NaN		44	NaN	NaN	NaN	NaN
10	NaN	NaN	NaN	NaN		45	0	NaN	0.857145	0.0100522
11	NaN	NaN	NaN	NaN		46	0	NaN	0.804469	0.0141655
12	NaN	NaN	NaN	NaN		47	0	NaN	0.80296	0.00823392
13	NaN	NaN	NaN	NaN		48	0	NaN	0.831062	0.0133817
14	NaN	NaN	NaN	NaN		49	0	NaN	0.831251	0.0124123
15	NaN	NaN	NaN	NaN		50	0	NaN	0.716474	0.00786721
16	NaN	NaN	NaN	NaN		51	0	NaN	0.715471	0.00609175
17	NaN	NaN	NaN	NaN		52	0	NaN	0.682805	0.00506145
18	NaN	NaN	NaN	NaN		53	0	NaN	0.659641	0.00379889
19	NaN	NaN	NaN	NaN		54	0	NaN	NaN	NaN
20	NaN	NaN	NaN	NaN		55	0	NaN	0.686034	0.00500074
21	NaN	NaN	NaN	NaN		56	0	NaN	0.706516	0.00326741
22	NaN	NaN	NaN	NaN		57	0	NaN	0.578832	0.00381094
23	NaN	NaN	NaN	NaN		58	0	NaN	0.586258	0.00412843
24	NaN	NaN	NaN	NaN		59	0	NaN	0.698007	0.00500736
25	NaN	NaN	NaN	NaN		60	0	NaN	0.632376	0.00428791
26	NaN	NaN	NaN	NaN		61	0	NaN	0.515256	0.00329248
27	NaN	NaN	NaN	NaN		62	0	NaN	0.921799	0.0086161
28	NaN	NaN	NaN	NaN		63	0	NaN	0.822235	0.0141559
29	NaN	NaN	NaN	NaN		64	0	NaN	0.895677	0.0156853
30	NaN	NaN	NaN	NaN		65	0	NaN	0.849955	0.00725621
31	NaN	NaN	NaN	NaN		66	0	NaN	0.86312	0.00867157
32	NaN	NaN	0.0232614	0.00209353		67	0.143007	0.00983361	0.849672	0.00672396
33	NaN	NaN	0.0788643	0.00709779		68	0.203512	0.017564	0.909992	0.0119821
34	NaN	NaN	0.0949686	0.00854717		69	0.194808	0.0120015	0.88076	0.008281
35	NaN	NaN	0.104337	0.00939033		70	NaN	NaN	NaN	NaN
36	NaN	NaN	NaN	NaN		71	0.137769	0.00946803	0.853646	0.00643886
37	NaN	NaN	0.120267	0.00841868		72	0.166707	0.0140943	0.832277	0.00996556
38	NaN	NaN	0.127903	0.0089532		73	0.291647	0.0214483	0.820603	0.0149009
39	NaN	NaN	0.122884	0.00860191		74	0.201109	0.0070366	0.992834	0.0107105
40	NaN	NaN	0.169664	0.0118765		75	0.413043	0.0116414	0.930788	0.00823403
41	NaN	NaN	0.134371	0.00940597		76	NaN	NaN	NaN	NaN
42	NaN	NaN	NaN	NaN		77	0.433736	0.0151651	0.872048	0.0100522
43	NaN	NaN	0.136521	0.0122869		78	0.349356	0.0103865	0.955289	0.00728039
44	NaN	NaN	NaN	NaN		79	0.463325	0.00844057	0.996402	0.00537738
45	NaN	NaN	0.111907	0.0100716		80	0.425527	0.00659968	0.969504	0.00387438
46	NaN	NaN	0.0829771	0.00746794		81	0.560905	0.011134	0.90914	0.00642643
47	NaN	NaN	0.0616093	0.00554483		82	0.604397	0.00971714	0.974367	0.00555726
48	NaN	NaN	0.0902259	0.00812033		83	0.64748	0.0102241	0.951936	0.00624741
49	NaN	NaN	NaN	NaN		84	0.748829	0.00705805	0.924756	0.00381767
50	NaN	NaN	NaN	NaN		85	0.752441	0.00615277	0.935662	0.00333401
51	NaN	NaN	NaN	NaN		86	0.849842	0.00835108	0.920416	0.00440121
52	NaN	NaN	NaN	NaN		87	0.976218	0.0103599	1.02085	0.00508205
53	NaN	NaN	NaN	NaN		88	1.00239	0.0072609	0.923645	0.00325296
54	NaN	NaN	NaN	NaN
55	NaN	NaN	NaN	NaN
56	NaN	NaN	NaN	NaN
57	NaN	NaN	NaN	NaN
58	NaN	NaN	NaN	NaN
59	NaN	NaN	NaN	NaN
60	NaN	NaN	NaN	NaN
61	NaN	NaN	NaN	NaN
62	NaN	NaN	NaN	NaN
63	NaN	NaN	NaN	NaN
64	NaN	NaN	0.142181	0.0113745
65	NaN	NaN	0.152738	0.0106917
66	NaN	NaN	0.277732	0.0166639
67	NaN	NaN	0.320211	0.00960632
68	NaN	NaN	0.38841	0.0116523
69	NaN	NaN	0.326343	0.0097903
70	NaN	NaN	NaN	NaN
71	NaN	NaN	0.259374	0.00778122
72	NaN	NaN	0.269649	0.00808946
73	0.171447	0.0150739	0.361392	0.0108418
74	0.387811	0.0148917	0.737513	0.0221254
75	0.273662	0.010493	0.394307	0.0118292
76	NaN	NaN	NaN	NaN
77	0.416763	0.0129645	0.356761	0.0107028
78	0.219503	0.00669165	0.479917	0.0143975
79	0.274897	0.0070318	0.492983	0.0147895
80	0.213381	0.00571153	0.476454	0.0142936
81	0.361905	0.00822314	0.479114	0.0143734
82	0.603918	0.00510001	0.575886	0.0172766
83	0.525902	0.00845096	0.469635	0.0140891
84	0.665324	0.00661757	0.505689	0.0151707
85	0.65963	0.00593336	0.55377	0.0166131
86	0.763317	0.00656447	0.43677	0.0131031
87	1.04977	0.00806581	0.617401	0.018522
88	1	0.00676	1	0.03
