# Supplementary material for: Multivalency, autoinhibition, and protein disorder in the regulation of interactions of dynein intermediate chain with dynactin and the nuclear distribution protein
Source: eLife journal article supplement (doi:10.7554/elife.80217), 2022-11-23
Supplement: fig7-data1 [file Figure 7-source data 1.xlsx]

## Sheet: SV-AUC
S	LC8	LC7	Tctex	IC260	p150CC1B	NudECC	IC260 + LC8	IC260 + LC7	IC260 + Tctex	IC260 + p150CC1B	IC260 + NudECC
0	0.00473	0.00484	0.00523	0.00514	0.0023	0.00557	0.00642	0.00551	0.0105	0.00438	0.00787
0.152	0.0109	0.0453	7.27e-06	0.549	0.284	1.26	0.187	0.253	0.54	0.134	1.62
0.303	5.25e-05	0.000133	3.55e-11	0.00203	0.0326	0.0601	3.4e-05	0.0562	0.00583	0.218	0.158
0.455	1.94e-07	1.28e-08	1.11e-14	6.97e-08	0.00101	6.21e-05	3.92e-10	0.0239	9.92e-05	0.191	0.00023
0.606	5.99e-10	1.24e-13	4.33e-14	2e-13	5.2e-06	3.4e-09	1.89e-14	0.0219	1.02e-05	0.0695	8.86e-09
0.758	2.65e-12	4.93e-14	1.13e-14	1.19e-14	6.29e-09	3.92e-14	5.08e-14	0.0318	8.53e-06	0.0219	3.63e-14
0.909	3.98e-14	1.96e-14	1.68e-14	5.21e-14	5.24e-12	6.81e-15	5.22e-14	0.0466	3.45e-05	0.0137	3.8e-14
1.06	1.32e-14	3.9e-14	7.43e-15	4.49e-14	3.81e-14	4.36e-14	8.73e-15	0.0478	0.000286	0.0228	9.07e-15
1.21	1.2e-14	6.58e-14	1.3e-14	5.3e-14	1.61e-14	7.72e-15	7.66e-15	0.0291	0.00221	0.065	1.53e-14
1.36	1.11e-13	2.45e-14	6.48e-14	7.59e-15	1.65e-14	1.31e-14	5.86e-14	0.0109	0.0102	0.135	2.28e-14
1.52	2.34e-11	7.54e-15	9.13e-15	1.78e-14	2.17e-14	3.24e-14	5.15e-14	0.00301	0.0256	0.105	3.4e-14
1.67	2.05e-08	1.15e-14	5.23e-14	8.08e-11	1.94e-11	1.02e-14	6.56e-15	0.000809	0.0405	0.0298	5.73e-14
1.82	2.33e-05	1.03e-15	1.25e-14	7.55e-06	8.97e-08	1.78e-14	1.36e-06	0.000294	0.0507	0.00589	1.26e-14
1.97	0.0101	1.16e-08	2.28e-12	0.0466	0.000356	5.03e-12	0.0023	0.000204	0.0616	0.00213	3.27e-13
2.12	0.635	0.000184	1.92e-08	4.1	0.184	2.14e-06	0.308	0.00036	0.0823	0.00289	7.64e-07
2.27	3.58	0.146	6.05e-05	2.44	2.45	0.0388	2.54	0.00175	0.128	0.0161	0.0483
2.42	1.97	3.26	0.0297	0.0108	0.287	4.47	1.98	0.0186	0.233	0.192	7.47
2.58	0.192	2.33	1.26	8.01e-07	0.0002	1.36	0.361	0.246	0.47	1.58	0.849
2.73	0.00815	0.107	4.05	3.49e-12	1.13e-09	0.00147	0.0448	1.83	0.964	2.73	8.81e-05
2.88	0.00038	0.00089	1.37	2.5e-14	4.94e-14	2.02e-08	0.00897	3.4	1.76	0.431	3.66e-11
3.03	4.03e-05	4.12e-06	0.101	2.03e-14	2.15e-14	4.21e-14	0.00471	0.913	2.52	0.00492	2.26e-14
3.18	1.44e-05	2.79e-08	0.00427	1.06e-14	4.52e-14	4.56e-14	0.00685	0.0318	2.6	6.05e-06	3.57e-14
3.33	1.76e-05	5.55e-10	0.00026	2.72e-14	2.78e-14	1.41e-14	0.0213	0.00021	1.92	1.92e-09	4.5e-14
3.48	5.65e-05	4.7e-11	4.54e-05	1e-14	4.63e-14	9.81e-15	0.092	5.57e-07	1.1	4.72e-13	4.26e-14
3.64	0.000308	1.84e-11	3.15e-05	8.83e-15	1.75e-14	5.17e-14	0.355	1.52e-09	0.554	1.08e-14	1.01e-14
3.79	0.00178	2.86e-11	8.11e-05	1.72e-14	1.09e-14	7.57e-15	0.863	1.02e-11	0.284	2.09e-14	1.27e-14
3.94	0.00717	1.36e-10	0.000519	6.99e-15	1.25e-14	8.77e-15	1.07	3.24e-13	0.162	1.39e-14	1.07e-14
4.09	0.0147	1.35e-09	0.00472	7.64e-15	2.26e-14	5.27e-14	0.651	6.73e-14	0.117	5.96e-14	5.51e-14
4.24	0.0132	2.03e-08	0.033	1.8e-14	5.44e-14	4.83e-14	0.201	9.63e-14	0.102	2.06e-14	7.09e-15
4.39	0.00487	3.45e-07	0.106	6.26e-14	1.79e-14	1.32e-14	0.0401	6.33e-13	0.104	2.3e-14	1.55e-14
4.55	0.000782	5.22e-06	0.112	3.02e-14	7.22e-15	5.02e-14	0.00604	1.32e-11	0.113	4.51e-14	4.57e-14
4.7	6.22e-05	5.92e-05	0.0321	1.57e-14	4.29e-14	1e-14	0.000864	5.28e-10	0.121	2.23e-14	1.87e-14
4.85	2.86e-06	0.000456	0.00258	9.07e-15	3.26e-14	1.11e-14	0.000141	2.55e-08	0.116	3.77e-14	1.56e-14
5	9.02e-08	0.00228	6.95e-05	6.32e-14	3.13e-14	6.94e-15	3.04e-05	1.02e-06	0.0967	4.63e-12	1.2e-14
5.15	2.31e-09	0.00745	7.9e-07	3.07e-14	3.64e-14	8.43e-13	9.39e-06	2.59e-05	0.069	4.21e-10	1.81e-14
5.3	5.54e-11	0.0165	4.95e-09	2.41e-14	4.86e-14	2.11e-10	4.33e-06	0.000359	0.043	2.38e-08	5.51e-14
5.45	1.43e-12	0.0261	2.37e-11	1.61e-14	7.1e-15	2.28e-08	2.96e-06	0.00259	0.0243	7.53e-07	3.56e-11
5.61	4.26e-14	0.0319	1.08e-13	1.26e-14	1.21e-14	1.08e-06	2.88e-06	0.0101	0.013	1.28e-05	8.21e-09
5.76	6.18e-14	0.032	8.06e-15	1.08e-14	2.1e-14	2.35e-05	3.72e-06	0.0229	0.00698	0.000119	6.7e-07
5.91	6.35e-14	0.0284	2.94e-14	1.11e-14	3.64e-14	0.000254	6.08e-06	0.0333	0.00387	0.000626	2.11e-05
6.06	8.06e-15	0.0235	1.59e-14	1.01e-14	6.22e-14	0.00149	1.14e-05	0.035	0.00228	0.002	0.000289
6.21	1.4e-14	0.0191	1.51e-14	9.86e-15	1.04e-14	0.00524	2.33e-05	0.0295	0.00146	0.00416	0.00193
6.36	3.1e-14	0.0156	1.8e-14	1.01e-14	1.96e-14	0.0121	4.81e-05	0.0219	0.00102	0.0062	0.00712
6.52	8.14e-15	0.0133	3.41e-14	1.2e-13	3.53e-14	0.0198	9.56e-05	0.0156	0.000766	0.0071	0.0163
6.67	3.08e-14	0.0119	6.68e-15	1.97e-12	6.08e-14	0.0252	0.000175	0.0113	0.000615	0.00681	0.0256
6.82	1.4e-14	0.0113	1.86e-14	2.51e-11	1.01e-14	0.0265	0.000282	0.00868	0.000518	0.00582	0.0304
6.97	8.18e-15	0.0112	5.84e-14	2.53e-10	1.89e-14	0.0245	0.00039	0.00728	0.000451	0.00472	0.0297
7.12	6.43e-14	0.0116	2.5e-14	2.06e-09	3.36e-14	0.0209	0.000459	0.00671	0.000398	0.00368	0.0254
7.27	6.67e-15	0.0124	1.29e-14	1.38e-08	5.67e-14	0.017	0.000457	0.00674	0.000351	0.00288	0.0202
7.42	8.88e-15	0.0135	8.34e-15	7.64e-08	9.16e-15	0.0137	0.000387	0.00733	0.000305	0.00231	0.0155
7.58	1.42e-14	0.0147	7.11e-15	3.58e-07	1.69e-14	0.011	0.000289	0.0085	0.000261	0.0019	0.012
7.73	2.54e-14	0.016	8.02e-15	1.43e-06	2.93e-14	0.00897	0.000197	0.0102	0.000217	0.00159	0.00941
7.88	4.75e-14	0.0172	1.14e-14	4.97e-06	4.82e-14	0.00749	0.000126	0.0124	0.000176	0.00136	0.00768
8.03	9.13e-15	0.0182	1.92e-14	1.5e-05	7.61e-15	0.00645	7.81e-05	0.0151	0.00014	0.00122	0.00656
8.18	1.96e-14	0.019	3.6e-14	3.96e-05	1.37e-14	0.00571	4.98e-05	0.0183	0.00011	0.00111	0.00584
8.33	4.01e-14	0.0195	7.11e-15	9.31e-05	2.32e-14	0.00519	3.36e-05	0.0214	8.5e-05	0.00104	0.00541
8.48	7.77e-15	0.0196	1.69e-14	0.000195	3.74e-14	0.00485	2.5e-05	0.0241	6.55e-05	0.001	0.00518
8.64	1.71e-14	0.0196	3.93e-14	0.000368	5.78e-14	0.00462	2.05e-05	0.0261	5.03e-05	0.001	0.00509
8.79	3.48e-14	0.0193	9.37e-15	0.00063	8.64e-15	0.00447	1.93e-05	0.0271	3.87e-05	0.00102	0.00509
8.94	6.67e-15	0.0189	2.42e-14	0.000986	1.47e-14	0.00438	2.06e-05	0.0272	2.98e-05	0.00108	0.00513
9.09	1.47e-14	0.0184	5.78e-14	0.00142	2.37e-14	0.00435	2.52e-05	0.0264	2.3e-05	0.00117	0.00521
9.24	3.03e-14	0.0178	1.29e-14	0.00191	3.67e-14	0.00433	3.42e-05	0.0248	1.78e-05	0.00128	0.00529
9.39	5.94e-14	0.0171	3.44e-14	0.00239	5.47e-14	0.00433	5.15e-05	0.0229	1.37e-05	0.00141	0.00534
9.55	1.12e-14	0.0163	8.45e-15	0.00283	7.92e-15	0.00433	8.25e-05	0.0208	1.06e-05	0.00154	0.00536
9.7	2.61e-14	0.0154	2.44e-14	0.00316	1.3e-14	0.00432	0.000137	0.0187	8.17e-06	0.00168	0.00535
9.85	5.76e-14	0.0144	6.29e-14	0.0034	2.03e-14	0.0043	0.000231	0.0167	6.36e-06	0.00179	0.00528
10	1.23e-14	0.0135	1.62e-14	0.0035	3.06e-14	0.00426	0.000381	0.0151	4.93e-06	0.00185	0.00517
10.2	3.35e-14	0.0124	4.7e-14	0.00348	4.46e-14	0.00419	0.000604	0.0137	3.84e-06	0.00185	0.00501
10.3	9.61e-15	0.0114	1.32e-14	0.00337	6.33e-14	0.0041	0.000892	0.0125	3.01e-06	0.0018	0.00481
10.5	2.93e-14	0.0105	4.16e-14	0.00318	8.77e-15	0.00398	0.0012	0.0115	2.37e-06	0.00169	0.00457
10.6	9.41e-14	0.00952	1.13e-14	0.00295	1.37e-14	0.00384	0.00146	0.0106	1.87e-06	0.00155	0.00431
10.8	3.17e-13	0.00862	3.83e-14	0.0027	2.05e-14	0.00368	0.0016	0.00987	1.48e-06	0.00138	0.00401
10.9	1.11e-12	0.00777	1.19e-14	0.00245	2.98e-14	0.00349	0.00156	0.00918	1.18e-06	0.00121	0.00371
11.1	3.98e-12	0.00698	3.89e-14	0.00222	4.2e-14	0.00328	0.00138	0.00856	9.33e-07	0.00105	0.00339
11.2	1.44e-11	0.00628	6.49e-16	0.00201	5.8e-14	0.00307	0.00109	0.00786	7.37e-07	0.000899	0.00306
11.4	5.17e-11	0.00558	8.87e-14	0.00183	7.84e-15	0.00284	0.000794	0.00718	5.77e-07	0.000759	0.00273
11.5	1.82e-10	0.005	2.29e-13	0.00168	1.19e-14	0.00261	0.000533	0.00646	4.52e-07	0.000635	0.00243
11.7	6.17e-10	0.00443	5.32e-13	0.00156	1.73e-14	0.00239	0.000339	0.0057	3.53e-07	0.000527	0.00213
11.8	2.02e-09	0.00392	1.13e-12	0.00146	2.46e-14	0.00217	0.000208	0.00496	2.74e-07	0.000441	0.00187
12	6.18e-09	0.00351	2.28e-12	0.00141	3.42e-14	0.00197	0.000125	0.0042	2.14e-07	0.000363	0.00164
12.1	1.78e-08	0.00314	4.39e-12	0.00136	4.65e-14	0.0018	7.54e-05	0.00347	1.68e-07	0.000299	0.00144
12.3	4.8e-08	0.00284	8.25e-12	0.00135	6.2e-14	0.00164	4.65e-05	0.00281	1.35e-07	0.000245	0.00128
12.4	1.21e-07	0.00259	1.57e-11	0.00136	8.15e-15	0.00151	2.97e-05	0.00222	1.11e-07	0.000207	0.00115
12.6	2.83e-07	0.00241	3.05e-11	0.0014	1.19e-14	0.00142	1.99e-05	0.00174	9.34e-08	0.000173	0.00105
12.7	6.23e-07	0.00228	6.18e-11	0.00146	1.69e-14	0.00136	1.41e-05	0.00135	8.13e-08	0.000149	0.000979
12.9	1.3e-06	0.0022	1.32e-10	0.00156	2.35e-14	0.00133	1.08e-05	0.00105	7.32e-08	0.000131	0.000944
13	2.55e-06	0.00216	3.05e-10	0.00169	3.18e-14	0.00134	8.88e-06	0.000839	6.9e-08	0.000119	0.000936
13.2	4.83e-06	0.0022	7.54e-10	0.00188	4.24e-14	0.0014	7.85e-06	0.000686	6.74e-08	0.000113	0.000969
13.3	8.92e-06	0.00226	2.02e-09	0.00211	5.55e-14	0.00151	7.51e-06	0.000587	6.84e-08	0.000113	0.00104
13.5	1.6e-05	0.0024	5.86e-09	0.00244	7.15e-15	0.00171	7.76e-06	0.000534	7.15e-08	0.00012	0.00118
13.6	2.85e-05	0.00258	1.85e-08	0.00288	1.02e-14	0.00203	8.6e-06	0.000521	7.72e-08	0.000139	0.00141
13.8	5.06e-05	0.00287	6.3e-08	0.00345	1.41e-14	0.00251	1.02e-05	0.000547	8.53e-08	0.000172	0.00178
13.9	9.09e-05	0.00325	2.35e-07	0.00425	1.92e-14	0.00328	1.3e-05	0.000628	9.58e-08	0.000237	0.00239
14.1	0.000165	0.00372	9.5e-07	0.0053	2.55e-14	0.00449	1.76e-05	0.000779	1.09e-07	0.000355	0.00344
14.2	0.000307	0.00439	4.23e-06	0.00683	3.33e-14	0.00648	2.53e-05	0.00106	1.24e-07	0.000598	0.00526
14.4	0.000587	0.00524	2.02e-05	0.00896	4.3e-14	0.00987	3.8e-05	0.00157	1.42e-07	0.0011	0.0087
14.5	0.00116	0.00643	0.000106	0.0119	5.46e-14	0.0158	6e-05	0.00253	1.62e-07	0.0023	0.0154
14.7	0.0024	0.00809	0.000601	0.0164	6.85e-15	0.0268	9.7e-05	0.0044	1.84e-07	0.0052	0.0294
14.8	0.00511	0.0104	0.00364	0.0229	9.44e-15	0.0479	0.000164	0.00825	2.07e-07	0.0133	0.0605
15	0.0228	0.0275	0.0472	0.0647	2.55e-14	0.18	0.000552	0.0328	4.64e-07	0.074	0.267
