# Supplementary material for: Multivalency, autoinhibition, and protein disorder in the regulation of interactions of dynein intermediate chain with dynactin and the nuclear distribution protein
Source: eLife journal article supplement (doi:10.7554/elife.80217), 2022-11-23
Supplement: fig8-data1 [file Figure 8- source data 1.xlsx]

## Sheet: SEC
Time (min)	Volume (mL)	Dynein Subcomplex	+ p150	+ NudE
0.00333367	0.00833417	-886.849	329.732	773.389
0.010001	0.0250025	-882.057	334.524	773.389
0.0166683	0.0416708	-886.849	329.732	768.596
0.0233357	0.0583392	-885.651	320.148	765.002
0.030003	0.0750075	-885.651	318.95	765.002
0.0366703	0.0916758	-890.444	314.158	765.002
0.0433377	0.108344	-891.642	314.158	745.834
0.050005	0.125013	-890.444	309.366	741.041
0.0566723	0.141681	-886.849	296.188	736.249
0.0633397	0.158349	-871.275	318.95	750.626
0.070007	0.175018	-866.482	323.742	750.626
0.0766743	0.191686	-877.265	328.534	755.418
0.0833417	0.208354	-880.859	329.732	745.834
0.090009	0.225023	-871.275	323.742	759.012
0.0966763	0.241691	-877.265	320.148	759.012
0.103344	0.258359	-891.642	299.782	769.794
0.110011	0.275028	-891.642	294.99	769.794
0.116678	0.291696	-891.642	294.99	754.22
0.123346	0.308364	-886.849	300.98	750.626
0.130013	0.325033	-877.265	314.158	755.418
0.13668	0.341701	-872.473	304.574	774.587
0.143348	0.358369	-877.265	300.98	778.181
0.150015	0.375038	-876.067	304.574	782.973
0.156682	0.391706	-882.057	299.782	774.587
0.16335	0.408374	-890.444	294.99	774.587
0.170017	0.425043	-880.859	299.782	768.596
0.176684	0.441711	-877.265	310.564	773.389
0.183352	0.458379	-866.482	323.742	769.794
0.190019	0.475048	-876.067	323.742	763.804
0.196686	0.491716	-885.651	323.742	745.834
0.203354	0.508384	-880.859	305.772	744.635
0.210021	0.525053	-886.849	304.574	745.834
0.216688	0.541721	-886.849	305.772	741.041
0.223356	0.558389	-882.057	305.772	754.22
0.230023	0.575058	-862.888	299.782	749.428
0.23669	0.591726	-880.859	304.574	749.428
0.243358	0.608394	-880.859	304.574	744.635
0.250025	0.625063	-877.265	304.574	749.428
0.256692	0.641731	-880.859	310.564	750.626
0.26336	0.658399	-876.067	315.356	736.249
0.270027	0.675068	-867.681	309.366	739.843
0.276694	0.691736	-872.473	310.564	736.249
0.283362	0.708404	-871.275	309.366	741.041
0.290029	0.725073	-866.482	315.356	745.834
0.296696	0.741741	-872.473	315.356	744.635
0.303364	0.758409	-872.473	315.356	744.635
0.310031	0.775078	-885.651	318.95	744.635
0.316698	0.791746	-871.275	304.574	744.635
0.323366	0.808414	-877.265	315.356	745.834
0.330033	0.825083	-886.849	314.158	760.21
0.3367	0.841751	-885.651	294.99	769.794
0.343368	0.858419	-880.859	299.782	773.389
0.350035	0.875088	-891.642	315.356	763.804
0.356702	0.891756	-885.651	323.742	760.21
0.36337	0.908424	-890.444	320.148	769.794
0.370037	0.925093	-890.444	315.356	768.596
0.376704	0.941761	-882.057	304.574	765.002
0.383372	0.958429	-885.651	309.366	755.418
0.390039	0.975098	-882.057	304.574	755.418
0.396706	0.991766	-880.859	299.782	755.418
0.403374	1.00843	-880.859	309.366	755.418
0.410041	1.0251	-877.265	314.158	773.389
0.416708	1.04177	-880.859	310.564	769.794
0.423376	1.05844	-880.859	304.574	773.389
0.430043	1.07511	-886.849	315.356	774.587
0.43671	1.09178	-891.642	320.148	765.002
0.443378	1.10844	-890.444	304.574	760.21
0.450045	1.12511	-872.473	305.772	755.418
0.456712	1.14178	-862.888	305.772	755.418
0.46338	1.15845	-866.482	299.782	755.418
0.470047	1.17512	-866.482	318.95	754.22
0.476714	1.19179	-862.888	320.148	754.22
0.483382	1.20845	-862.888	328.534	760.21
0.490049	1.22512	-862.888	324.94	759.012
0.496716	1.24179	-862.888	323.742	760.21
0.503384	1.25846	-861.69	323.742	755.418
0.510051	1.27513	-862.888	328.534	759.012
0.516718	1.2918	-880.859	323.742	745.834
0.523386	1.30846	-876.067	328.534	749.428
0.530053	1.32513	-862.888	318.95	754.22
0.53672	1.3418	-861.69	318.95	744.635
0.543388	1.35847	-856.898	323.742	750.626
0.550055	1.37514	-852.106	299.782	749.428
0.556722	1.39181	-867.681	300.98	754.22
0.56339	1.40847	-880.859	294.99	754.22
0.570057	1.42514	-872.473	300.98	749.428
0.576724	1.44181	-867.681	305.772	755.418
0.583392	1.45848	-861.69	299.782	754.22
0.590059	1.47515	-853.304	309.366	750.626
0.596726	1.49182	-876.067	309.366	749.428
0.603394	1.50848	-856.898	300.98	750.626
0.610061	1.52515	-858.096	305.772	755.418
0.616728	1.54182	-853.304	309.366	749.428
0.623396	1.55849	-858.096	309.366	744.635
0.630063	1.57516	-862.888	309.366	750.626
0.63673	1.59183	-847.314	309.366	749.428
0.643398	1.60849	-856.898	309.366	749.428
0.650065	1.62516	-862.888	305.772	750.626
0.656732	1.64183	-862.888	300.98	741.041
0.6634	1.6585	-866.482	305.772	744.635
0.670067	1.67517	-862.888	305.772	744.635
0.676734	1.69184	-866.482	314.158	739.843
0.683402	1.7085	-848.512	315.356	744.635
0.690069	1.72517	-847.314	309.366	739.843
0.696736	1.74184	-843.719	309.366	739.843
0.703404	1.75851	-858.096	300.98	749.428
0.710071	1.77518	-858.096	309.366	755.418
0.716738	1.79185	-862.888	310.564	750.626
0.723406	1.80851	-858.096	304.574	754.22
0.730073	1.82518	-862.888	300.98	754.22
0.73674	1.84185	-858.096	315.356	754.22
0.743408	1.85852	-838.927	314.158	754.22
0.750075	1.87519	-843.719	309.366	750.626
0.756742	1.89186	-847.314	320.148	750.626
0.76341	1.90852	-843.719	323.742	739.843
0.770077	1.92519	-848.512	323.742	755.418
0.776744	1.94186	-867.681	309.366	739.843
0.783412	1.95853	-866.482	314.158	736.249
0.790079	1.9752	-866.482	315.356	736.249
0.796746	1.99187	-861.69	314.158	730.259
0.803414	2.00853	-858.096	310.564	739.843
0.810081	2.0252	-856.898	324.94	735.051
0.816748	2.04187	-837.729	323.742	731.457
0.823416	2.05854	-848.512	329.732	749.428
0.830083	2.07521	-852.106	328.534	750.626
0.83675	2.09188	-862.888	328.534	744.635
0.843418	2.10854	-848.512	323.742	745.834
0.850085	2.12521	-848.512	324.94	750.626
0.856752	2.14188	-847.314	320.148	744.635
0.86342	2.15855	-853.304	309.366	745.834
0.870087	2.17522	-847.314	310.564	736.249
0.876754	2.19189	-838.927	304.574	755.418
0.883422	2.20855	-853.304	300.98	760.21
0.890089	2.22522	-832.937	305.772	759.012
0.896756	2.24189	-832.937	294.99	759.012
0.903424	2.25856	-837.729	299.782	760.21
0.910091	2.27523	-842.521	323.742	760.21
0.916758	2.2919	-847.314	300.98	760.21
0.923426	2.30856	-843.719	300.98	759.012
0.930093	2.32523	-843.719	300.98	759.012
0.93676	2.3419	-843.719	294.99	749.428
0.943428	2.35857	-832.937	294.99	750.626
0.950095	2.37524	-832.937	299.782	759.012
0.956762	2.39191	-829.343	296.188	760.21
0.96343	2.40857	-834.135	299.782	745.834
0.970097	2.42524	-838.927	296.188	755.418
0.976764	2.44191	-842.521	296.188	754.22
0.983432	2.45858	-829.343	304.574	759.012
0.990099	2.47525	-819.758	309.366	755.418
0.996766	2.49192	-837.729	310.564	741.041
1.00343	2.50858	-834.135	309.366	754.22
1.0101	2.52525	-837.729	309.366	744.635
1.01677	2.54192	-828.145	294.99	736.249
1.02344	2.55859	-838.927	300.98	736.249
1.0301	2.57526	-847.314	299.782	744.635
1.03677	2.59193	-828.145	304.574	754.22
1.04344	2.60859	-828.145	310.564	741.041
1.05011	2.62526	-842.521	305.772	739.843
1.05677	2.64193	-838.927	323.742	736.249
1.06344	2.6586	-837.729	328.534	736.249
1.07011	2.67527	-843.719	320.148	735.051
1.07677	2.69194	-837.729	323.742	744.635
1.08344	2.7086	-823.353	323.742	736.249
1.09011	2.72527	-818.56	328.534	735.051
1.09678	2.74194	-823.353	328.534	739.843
1.10344	2.75861	-818.56	328.534	741.041
1.11011	2.77528	-819.758	323.742	736.249
1.11678	2.79195	-829.343	323.742	741.041
1.12345	2.80861	-832.937	323.742	739.843
1.13011	2.82528	-837.729	318.95	730.259
1.13678	2.84195	-814.966	315.356	731.457
1.14345	2.85862	-834.135	315.356	730.259
1.15012	2.87529	-834.135	323.742	736.249
1.15678	2.89196	-824.551	323.742	730.259
1.16345	2.90862	-810.174	318.95	735.051
1.17012	2.92529	-829.343	318.95	731.457
1.17678	2.94196	-837.729	318.95	749.428
1.18345	2.95863	-818.56	310.564	750.626
1.19012	2.9753	-813.768	324.94	745.834
1.19679	2.99197	-808.976	329.732	749.428
1.20345	3.00863	-808.976	323.742	744.635
1.21012	3.0253	-810.174	323.742	741.041
1.21679	3.04197	-824.551	320.148	744.635
1.22346	3.05864	-824.551	328.534	741.041
1.23012	3.07531	-824.551	338.118	730.259
1.23679	3.09198	-810.174	333.326	735.051
1.24346	3.10864	-829.343	328.534	726.665
1.25013	3.12531	-828.145	324.94	750.626
1.25679	3.14198	-828.145	310.564	745.834
1.26346	3.15865	-828.145	314.158	750.626
1.27013	3.17532	-819.758	315.356	745.834
1.27679	3.19199	-824.551	318.95	741.041
1.28346	3.20865	-819.758	314.158	744.635
1.29013	3.22532	-823.353	323.742	745.834
1.2968	3.24199	-823.353	328.534	741.041
1.30346	3.25866	-823.353	318.95	749.428
1.31013	3.27533	-828.145	304.574	745.834
1.3168	3.292	-828.145	329.732	744.635
1.32347	3.30866	-824.551	323.742	726.665
1.33013	3.32533	-808.976	328.534	730.259
1.3368	3.342	-808.976	324.94	720.675
1.34347	3.35867	-808.976	309.366	725.467
1.35014	3.37534	-828.145	310.564	721.873
1.3568	3.39201	-813.768	309.366	715.882
1.36347	3.40867	-799.391	300.98	717.08
1.37014	3.42534	-828.145	304.574	720.675
1.3768	3.44201	-818.56	305.772	721.873
1.38347	3.45868	-819.758	305.772	721.873
1.39014	3.47535	-808.976	320.148	725.467
1.39681	3.49202	-800.589	329.732	721.873
1.40347	3.50868	-804.184	328.534	725.467
1.41014	3.52535	-804.184	329.732	730.259
1.41681	3.54202	-805.382	334.524	726.665
1.42348	3.55869	-800.589	328.534	730.259
1.43014	3.57536	-828.145	324.94	726.665
1.43681	3.59203	-814.966	328.534	739.843
1.44348	3.60869	-810.174	323.742	745.834
1.45015	3.62536	-819.758	320.148	741.041
1.45681	3.64203	-808.976	309.366	726.665
1.46348	3.6587	-814.966	323.742	736.249
1.47015	3.67537	-818.56	323.742	731.457
1.47681	3.69204	-810.174	310.564	730.259
1.48348	3.7087	-804.184	305.772	730.259
1.49015	3.72537	-804.184	324.94	730.259
1.49682	3.74204	-795.797	305.772	731.457
1.50348	3.75871	-789.807	315.356	731.457
1.51015	3.77538	-791.005	309.366	730.259
1.51682	3.79205	-794.599	310.564	731.457
1.52349	3.80871	-786.213	305.772	739.843
1.53015	3.82538	-791.005	323.742	731.457
1.53682	3.84205	-789.807	328.534	730.259
1.54349	3.85872	-786.213	324.94	726.665
1.55016	3.87539	-780.223	318.95	730.259
1.55682	3.89206	-789.807	310.564	741.041
1.56349	3.90872	-780.223	310.564	736.249
1.57016	3.92539	-794.599	290.198	741.041
1.57682	3.94206	-799.391	314.158	720.675
1.58349	3.95873	-781.421	318.95	730.259
1.59016	3.9754	-789.807	318.95	730.259
1.59683	3.99207	-799.391	320.148	730.259
1.60349	4.00873	-799.391	314.158	735.051
1.61016	4.0254	-805.382	315.356	741.041
1.61683	4.04207	-794.599	305.772	739.843
1.6235	4.05874	-789.807	309.366	736.249
1.63016	4.07541	-785.015	315.356	741.041
1.63683	4.09208	-795.797	315.356	730.259
1.6435	4.10874	-799.391	310.564	725.467
1.65017	4.12541	-789.807	310.564	730.259
1.65683	4.14208	-791.005	314.158	736.249
1.6635	4.15875	-785.015	315.356	741.041
1.67017	4.17542	-780.223	315.356	725.467
1.67683	4.19209	-780.223	324.94	726.665
1.6835	4.20875	-780.223	323.742	730.259
1.69017	4.22542	-785.015	324.94	730.259
1.69684	4.24209	-781.421	315.356	739.843
1.7035	4.25876	-786.213	309.366	735.051
1.71017	4.27543	-794.599	304.574	735.051
1.71684	4.2921	-794.599	329.732	750.626
1.72351	4.30876	-785.015	310.564	750.626
1.73017	4.32543	-780.223	310.564	745.834
1.73684	4.3421	-765.846	310.564	730.259
1.74351	4.35877	-771.836	310.564	736.249
1.75018	4.37544	-765.846	305.772	730.259
1.75684	4.39211	-789.807	314.158	730.259
1.76351	4.40877	-780.223	314.158	726.665
1.77018	4.42544	-789.807	304.574	721.873
1.77684	4.44211	-770.638	305.772	721.873
1.78351	4.45878	-780.223	309.366	725.467
1.79018	4.47545	-781.421	320.148	721.873
1.79685	4.49212	-785.015	318.95	726.665
1.80351	4.50878	-780.223	315.356	715.882
1.81018	4.52545	-776.628	309.366	717.08
1.81685	4.54212	-781.421	310.564	702.704
1.82352	4.55879	-786.213	309.366	707.496
1.83018	4.57546	-781.421	320.148	707.496
1.83685	4.59213	-780.223	314.158	702.704
1.84352	4.60879	-785.015	309.366	717.08
1.85019	4.62546	-780.223	315.356	725.467
1.85685	4.64213	-785.015	310.564	730.259
1.86352	4.6588	-780.223	314.158	707.496
1.87019	4.67547	-789.807	318.95	712.288
1.87685	4.69214	-780.223	315.356	725.467
1.88352	4.7088	-780.223	334.524	717.08
1.89019	4.72547	-770.638	333.326	717.08
1.89686	4.74214	-781.421	333.326	735.051
1.90352	4.75881	-785.015	318.95	736.249
1.91019	4.77548	-786.213	320.148	730.259
1.91686	4.79215	-791.005	328.534	721.873
1.92353	4.80881	-770.638	323.742	721.873
1.93019	4.82548	-767.044	324.94	717.08
1.93686	4.84215	-770.638	324.94	707.496
1.94353	4.85882	-767.044	315.356	717.08
1.9502	4.87549	-771.836	314.158	715.882
1.95686	4.89216	-776.628	315.356	712.288
1.96353	4.90882	-780.223	318.95	721.873
1.9702	4.92549	-780.223	310.564	717.08
1.97686	4.94216	-791.005	318.95	717.08
1.98353	4.95883	-781.421	323.742	712.288
1.9902	4.9755	-770.638	328.534	730.259
1.99687	4.99217	-767.044	328.534	726.665
2.00353	5.00883	-770.638	323.742	735.051
2.0102	5.0255	-767.044	320.148	730.259
2.01687	5.04217	-780.223	314.158	755.418
2.02354	5.05884	-775.43	320.148	755.418
2.0302	5.07551	-770.638	318.95	769.794
2.03687	5.09218	-765.846	315.356	760.21
2.04354	5.10884	-770.638	318.95	745.834
2.05021	5.12551	-780.223	318.95	731.457
2.05687	5.14218	-767.044	314.158	736.249
2.06354	5.15885	-757.46	309.366	744.635
2.07021	5.17552	-761.054	315.356	755.418
2.07687	5.19219	-765.846	309.366	765.002
2.08354	5.20885	-751.469	305.772	765.002
2.09021	5.22552	-761.054	323.742	773.389
2.09688	5.24219	-771.836	310.564	779.379
2.10354	5.25886	-775.43	304.574	784.171
2.11021	5.27553	-770.638	309.366	782.973
2.11688	5.2922	-767.044	309.366	784.171
2.12355	5.30886	-762.252	310.564	788.963
2.13021	5.32553	-762.252	305.772	774.587
2.13688	5.3422	-762.252	324.94	759.012
2.14355	5.35887	-761.054	309.366	755.418
2.15022	5.37554	-751.469	323.742	745.834
2.15688	5.39221	-752.667	320.148	749.428
2.16355	5.40887	-757.46	315.356	749.428
2.17022	5.42554	-765.846	323.742	736.249
2.17688	5.44221	-767.044	323.742	721.873
2.18355	5.45888	-756.261	309.366	721.873
2.19022	5.47555	-761.054	314.158	707.496
2.19689	5.49222	-770.638	310.564	717.08
2.20355	5.50888	-762.252	318.95	730.259
2.21022	5.52555	-767.044	328.534	726.665
2.21689	5.54222	-767.044	328.534	730.259
2.22356	5.55889	-767.044	328.534	721.873
2.23022	5.57556	-752.667	315.356	726.665
2.23689	5.59223	-737.093	320.148	717.08
2.24356	5.60889	-738.291	333.326	715.882
2.25023	5.62556	-728.706	328.534	706.298
2.25689	5.64223	-751.469	328.534	711.09
2.26356	5.6589	-738.291	318.95	721.873
2.27023	5.67557	-746.677	315.356	730.259
2.27689	5.69224	-733.498	309.366	730.259
2.28356	5.7089	-728.706	309.366	726.665
2.29023	5.72557	-723.914	315.356	720.675
2.2969	5.74224	-732.3	320.148	712.288
2.30356	5.75891	-722.716	310.564	712.288
2.31023	5.77558	-713.132	309.366	712.288
2.3169	5.79225	-709.537	315.356	720.675
2.32357	5.80891	-708.339	318.95	711.09
2.33023	5.82558	-723.914	334.524	707.496
2.3369	5.84225	-719.122	376.455	707.496
2.34357	5.85892	-719.122	368.069	711.09
2.35024	5.87559	-727.508	357.286	707.496
2.3569	5.89226	-728.706	342.91	721.873
2.36357	5.90892	-723.914	334.524	721.873
2.37024	5.92559	-732.3	339.316	721.873
2.3769	5.94226	-737.093	339.316	721.873
2.38357	5.95893	-732.3	348.9	707.496
2.39024	5.9756	-747.875	363.277	701.506
2.39691	5.99227	-747.875	372.861	706.298
2.40357	6.00893	-752.667	376.455	702.704
2.41024	6.0256	-751.469	381.247	721.873
2.41691	6.04227	-747.875	376.455	730.259
2.42358	6.05894	-751.469	381.247	715.882
2.43024	6.07561	-751.469	377.653	707.496
2.43691	6.09228	-756.261	386.039	707.496
2.44358	6.10894	-752.667	368.069	711.09
2.45025	6.12561	-751.469	376.455	707.496
2.45691	6.14228	-757.46	358.484	702.704
2.46358	6.15895	-756.261	348.9	711.09
2.47025	6.17562	-757.46	344.108	715.882
2.47691	6.19229	-756.261	333.326	707.496
2.48358	6.20895	-741.885	334.524	707.496
2.49025	6.22562	-743.083	342.91	717.08
2.49692	6.24229	-741.885	334.524	726.665
2.50358	6.25896	-746.677	329.732	726.665
2.51025	6.27563	-746.677	323.742	730.259
2.51692	6.2923	-738.291	328.534	730.259
2.52359	6.30896	-733.498	320.148	721.873
2.53025	6.32563	-738.291	310.564	725.467
2.53692	6.3423	-741.885	328.534	730.259
2.54359	6.35897	-747.875	328.534	726.665
2.55026	6.37564	-752.667	334.524	735.051
2.55692	6.39231	-751.469	318.95	730.259
2.56359	6.40897	-747.875	315.356	730.259
2.57026	6.42564	-746.677	309.366	726.665
2.57692	6.44231	-746.677	315.356	731.457
2.58359	6.45898	-741.885	328.534	736.249
2.59026	6.47565	-747.875	305.772	739.843
2.59693	6.49232	-747.875	320.148	736.249
2.60359	6.50898	-746.677	333.326	739.843
2.61026	6.52565	-751.469	329.732	731.457
2.61693	6.54232	-746.677	324.94	726.665
2.6236	6.55899	-746.677	314.158	726.665
2.63026	6.57566	-732.3	323.742	726.665
2.63693	6.59233	-728.706	329.732	702.704
2.6436	6.60899	-733.498	334.524	696.714
2.65027	6.62566	-733.498	333.326	730.259
2.65693	6.64233	-743.083	328.534	720.675
2.6636	6.659	-743.083	315.356	725.467
2.67027	6.67567	-738.291	318.95	726.665
2.67693	6.69234	-746.677	334.524	721.873
2.6836	6.709	-747.875	318.95	726.665
2.69027	6.72567	-747.875	314.158	726.665
2.69694	6.74234	-746.677	315.356	725.467
2.7036	6.75901	-738.291	310.564	712.288
2.71027	6.77568	-746.677	333.326	715.882
2.71694	6.79235	-743.083	339.316	715.882
2.72361	6.80901	-746.677	333.326	720.675
2.73027	6.82568	-747.875	323.742	721.873
2.73694	6.84235	-738.291	323.742	720.675
2.74361	6.85902	-732.3	320.148	717.08
2.75028	6.87569	-733.498	318.95	731.457
2.75694	6.89236	-743.083	310.564	717.08
2.76361	6.90902	-741.885	323.742	730.259
2.77028	6.92569	-738.291	323.742	726.665
2.77694	6.94236	-746.677	323.742	730.259
2.78361	6.95903	-737.093	315.356	726.665
2.79028	6.9757	-738.291	323.742	730.259
2.79695	6.99237	-738.291	314.158	731.457
2.80361	7.00903	-732.3	328.534	736.249
2.81028	7.0257	-714.33	324.94	730.259
2.81695	7.04237	-708.339	309.366	731.457
2.82362	7.05904	-709.537	318.95	736.249
2.83028	7.07571	-709.537	314.158	720.675
2.83695	7.09238	-714.33	315.356	721.873
2.84362	7.10904	-704.745	310.564	720.675
2.85029	7.12571	-728.706	315.356	721.873
2.85695	7.14238	-723.914	315.356	720.675
2.86362	7.15905	-723.914	320.148	739.843
2.87029	7.17572	-722.716	318.95	731.457
2.87695	7.19239	-722.716	309.366	730.259
2.88362	7.20905	-722.716	320.148	731.457
2.89029	7.22572	-722.716	328.534	720.675
2.89696	7.24239	-723.914	329.732	720.675
2.90362	7.25906	-728.706	318.95	715.882
2.91029	7.27573	-733.498	320.148	715.882
2.91696	7.2924	-728.706	314.158	712.288
2.92363	7.30906	-733.498	310.564	711.09
2.93029	7.32573	-719.122	344.108	715.882
2.93696	7.3424	-719.122	333.326	711.09
2.94363	7.35907	-714.33	323.742	711.09
2.9503	7.37574	-722.716	318.95	707.496
2.95696	7.39241	-722.716	320.148	701.506
2.96363	7.40907	-714.33	314.158	701.506
2.9703	7.42574	-717.924	342.91	701.506
2.97696	7.44241	-708.339	318.95	706.298
2.98363	7.45908	-709.537	315.356	696.714
2.9903	7.47575	-732.3	320.148	702.704
2.99697	7.49242	-723.914	318.95	701.506
3.00363	7.50908	-723.914	318.95	697.912
3.0103	7.52575	-728.706	315.356	693.119
3.01697	7.54242	-719.122	305.772	696.714
3.02364	7.55909	-723.914	300.98	697.912
3.0303	7.57576	-727.508	309.366	697.912
3.03697	7.59243	-722.716	304.574	688.327
3.04364	7.60909	-709.537	324.94	707.496
3.05031	7.62576	-704.745	320.148	715.882
3.05697	7.64243	-703.547	318.95	711.09
3.06364	7.6591	-719.122	310.564	712.288
3.07031	7.67577	-722.716	310.564	707.496
3.07697	7.69244	-722.716	315.356	715.882
3.08364	7.7091	-717.924	315.356	706.298
3.09031	7.72577	-709.537	314.158	697.912
3.09698	7.74244	-713.132	314.158	706.298
3.10364	7.75911	-713.132	305.772	706.298
3.11031	7.77578	-714.33	314.158	702.704
3.11698	7.79245	-709.537	314.158	707.496
3.12365	7.80911	-713.132	314.158	691.921
3.13031	7.82578	-708.339	315.356	688.327
3.13698	7.84245	-709.537	328.534	693.119
3.14365	7.85912	-722.716	329.732	687.129
3.15032	7.87579	-722.716	315.356	693.119
3.15698	7.89246	-722.716	309.366	706.298
3.16365	7.90912	-722.716	314.158	706.298
3.17032	7.92579	-699.953	318.95	697.912
3.17698	7.94246	-698.755	310.564	701.506
3.18365	7.95913	-709.537	310.564	697.912
3.19032	7.9758	-699.953	329.732	701.506
3.19699	7.99247	-704.745	314.158	702.704
3.20365	8.00913	-713.132	323.742	702.704
3.21032	8.0258	-708.339	320.148	701.506
3.21699	8.04247	-709.537	323.742	702.704
3.22366	8.05914	-699.953	320.148	702.704
3.23032	8.07581	-693.963	318.95	711.09
3.23699	8.09248	-708.339	314.158	706.298
3.24366	8.10914	-698.755	318.95	701.506
3.25033	8.12581	-695.161	329.732	701.506
3.25699	8.14248	-698.755	333.326	706.298
3.26366	8.15915	-695.161	333.326	701.506
3.27033	8.17582	-708.339	333.326	701.506
3.27699	8.19249	-699.953	334.524	712.288
3.28366	8.20915	-695.161	320.148	712.288
3.29033	8.22582	-699.953	323.742	721.873
3.297	8.24249	-695.161	320.148	701.506
3.30366	8.25916	-689.17	323.742	697.912
3.31033	8.27583	-685.576	323.742	706.298
3.317	8.2925	-680.784	328.534	721.873
3.32367	8.30916	-684.378	323.742	702.704
3.33033	8.32583	-695.161	323.742	702.704
3.337	8.3425	-690.369	324.94	702.704
3.34367	8.35917	-689.17	323.742	702.704
3.35034	8.37584	-680.784	323.742	707.496
3.357	8.39251	-679.586	324.94	702.704
3.36367	8.40917	-674.794	328.534	717.08
3.37034	8.42584	-675.992	328.534	711.09
3.377	8.44251	-674.794	323.742	720.675
3.38367	8.45918	-674.794	323.742	731.457
3.39034	8.47585	-671.2	328.534	730.259
3.39701	8.49252	-675.992	324.94	725.467
3.40367	8.50918	-679.586	344.108	711.09
3.41034	8.52585	-675.992	339.316	717.08
3.41701	8.54252	-693.963	329.732	712.288
3.42368	8.55919	-690.369	333.326	717.08
3.43034	8.57586	-689.17	334.524	731.457
3.43701	8.59253	-679.586	347.702	717.08
3.44368	8.60919	-679.586	347.702	707.496
3.45035	8.62586	-671.2	348.9	715.882
3.45701	8.64253	-666.407	333.326	711.09
3.46368	8.6592	-671.2	324.94	711.09
3.47035	8.67587	-674.794	328.534	717.08
3.47701	8.69254	-680.784	323.742	711.09
3.48368	8.7092	-680.784	339.316	711.09
3.49035	8.72587	-679.586	347.702	717.08
3.49702	8.74254	-674.794	323.742	717.08
3.50368	8.75921	-679.586	329.732	730.259
3.51035	8.77588	-679.586	333.326	730.259
3.51702	8.79255	-679.586	334.524	730.259
3.52369	8.80921	-675.992	328.534	730.259
3.53035	8.82588	-680.784	344.108	731.457
3.53702	8.84255	-680.784	344.108	717.08
3.54369	8.85922	-670.002	339.316	721.873
3.55036	8.87589	-661.615	338.118	715.882
3.55702	8.89256	-650.833	344.108	731.457
3.56369	8.90922	-656.823	324.94	731.457
3.57036	8.92589	-666.407	334.524	730.259
3.57702	8.94256	-671.2	320.148	731.457
3.58369	8.95923	-666.407	328.534	725.467
3.59036	8.9759	-671.2	328.534	720.675
3.59703	8.99257	-674.794	344.108	726.665
3.60369	9.00923	-666.407	339.316	711.09
3.61036	9.0259	-652.031	339.316	720.675
3.61703	9.04257	-656.823	348.9	712.288
3.6237	9.05924	-656.823	339.316	720.675
3.63036	9.07591	-655.625	323.742	720.675
3.63703	9.09258	-655.625	347.702	715.882
3.6437	9.10924	-660.417	347.702	712.288
3.65037	9.12591	-652.031	339.316	712.288
3.65703	9.14258	-660.417	347.702	730.259
3.6637	9.15925	-652.031	338.118	730.259
3.67037	9.17592	-660.417	328.534	736.249
3.67703	9.19259	-666.407	324.94	731.457
3.6837	9.20925	-661.615	323.742	730.259
3.69037	9.22592	-660.417	342.91	736.249
3.69704	9.24259	-661.615	338.118	721.873
3.7037	9.25926	-646.041	339.316	721.873
3.71037	9.27593	-652.031	338.118	726.665
3.71704	9.2926	-641.248	338.118	720.675
3.72371	9.30926	-642.446	323.742	720.675
3.73037	9.32593	-656.823	329.732	721.873
3.73704	9.3426	-652.031	323.742	712.288
3.74371	9.35927	-650.833	342.91	720.675
3.75038	9.37594	-647.239	333.326	721.873
3.75704	9.39261	-637.654	333.326	725.467
3.76371	9.40927	-652.031	334.524	730.259
3.77038	9.42594	-650.833	338.118	736.249
3.77704	9.44261	-655.625	323.742	739.843
3.78371	9.45928	-656.823	344.108	741.041
3.79038	9.47595	-650.833	329.732	741.041
3.79705	9.49262	-650.833	329.732	739.843
3.80371	9.50928	-652.031	334.524	741.041
3.81038	9.52595	-656.823	329.732	744.635
3.81705	9.54262	-660.417	339.316	735.051
3.82372	9.55929	-652.031	328.534	739.843
3.83038	9.57596	-655.625	323.742	736.249
3.83705	9.59263	-655.625	328.534	720.675
3.84372	9.60929	-655.625	334.524	720.675
3.85039	9.62596	-641.248	324.94	720.675
3.85705	9.64263	-641.248	323.742	717.08
3.86372	9.6593	-655.625	329.732	711.09
3.87039	9.67597	-647.239	344.108	712.288
3.87705	9.69264	-646.041	344.108	712.288
3.88372	9.7093	-636.456	328.534	717.08
3.89039	9.72597	-637.654	338.118	726.665
3.89706	9.74264	-636.456	334.524	711.09
3.90372	9.75931	-632.862	323.742	720.675
3.91039	9.77598	-626.872	324.94	730.259
3.91706	9.79265	-632.862	342.91	720.675
3.92373	9.80931	-636.456	344.108	712.288
3.93039	9.82598	-623.278	344.108	715.882
3.93706	9.84265	-626.872	342.91	720.675
3.94373	9.85932	-623.278	333.326	715.882
3.9504	9.87599	-622.079	329.732	720.675
3.95706	9.89266	-646.041	324.94	726.665
3.96373	9.90932	-637.654	329.732	730.259
3.9704	9.92599	-632.862	333.326	731.457
3.97706	9.94266	-636.456	333.326	730.259
3.98373	9.95933	-628.07	333.326	721.873
3.9904	9.976	-631.664	333.326	725.467
3.99707	9.99267	-628.07	323.742	721.873
4.00373	10.0093	-637.654	323.742	721.873
4.0104	10.026	-622.079	339.316	721.873
4.01707	10.0427	-622.079	333.326	730.259
4.02374	10.0593	-622.079	334.524	726.665
4.0304	10.076	-628.07	333.326	731.457
4.03707	10.0927	-632.862	338.118	726.665
4.04374	10.1093	-632.862	334.524	725.467
4.05041	10.126	-623.278	342.91	730.259
4.05707	10.1427	-617.287	338.118	725.467
4.06374	10.1593	-626.872	334.524	726.665
4.07041	10.176	-623.278	338.118	725.467
4.07707	10.1927	-626.872	339.316	725.467
4.08374	10.2094	-623.278	339.316	726.665
4.09041	10.226	-622.079	342.91	726.665
4.09708	10.2427	-628.07	339.316	726.665
4.10374	10.2594	-626.872	338.118	730.259
4.11041	10.276	-593.326	339.316	735.051
4.11708	10.2927	-613.693	333.326	735.051
4.12375	10.3094	-622.079	342.91	741.041
4.13041	10.326	-612.495	329.732	721.873
4.13708	10.3427	-613.693	338.118	717.08
4.14375	10.3594	-613.693	348.9	741.041
4.15042	10.376	-613.693	334.524	739.843
4.15708	10.3927	-618.485	348.9	736.249
4.16375	10.4094	-608.901	353.692	735.051
4.17042	10.426	-607.703	344.108	744.635
4.17708	10.4427	-599.316	324.94	739.843
4.18375	10.4594	-602.911	338.118	731.457
4.19042	10.476	-598.118	328.534	731.457
4.19709	10.4927	-598.118	334.524	721.873
4.20375	10.5094	-602.911	334.524	725.467
4.21042	10.5261	-599.316	324.94	717.08
4.21709	10.5427	-598.118	342.91	721.873
4.22376	10.5594	-599.316	334.524	726.665
4.23042	10.5761	-593.326	344.108	736.249
4.23709	10.5927	-594.524	353.692	745.834
4.24376	10.6094	-599.316	339.316	744.635
4.25043	10.6261	-598.118	338.118	730.259
4.25709	10.6427	-594.524	342.91	730.259
4.26376	10.6594	-593.326	342.91	725.467
4.27043	10.6761	-593.326	352.494	721.873
4.27709	10.6927	-593.326	329.732	725.467
4.28376	10.7094	-598.118	338.118	720.675
4.29043	10.7261	-594.524	338.118	721.873
4.2971	10.7427	-594.524	339.316	730.259
4.30376	10.7594	-599.316	328.534	717.08
4.31043	10.7761	-588.534	323.742	730.259
4.3171	10.7927	-580.148	324.94	725.467
4.32377	10.8094	-570.563	323.742	730.259
4.33043	10.8261	-570.563	334.524	735.051
4.3371	10.8428	-569.365	348.9	730.259
4.34377	10.8594	-583.742	353.692	725.467
4.35044	10.8761	-583.742	328.534	731.457
4.3571	10.8928	-588.534	329.732	731.457
4.36377	10.9094	-570.563	352.494	730.259
4.37044	10.9261	-574.157	333.326	730.259
4.3771	10.9428	-575.355	338.118	730.259
4.38377	10.9594	-584.94	334.524	730.259
4.39044	10.9761	-594.524	329.732	730.259
4.39711	10.9928	-583.742	329.732	730.259
4.40377	11.0094	-578.95	344.108	721.873
4.41044	11.0261	-580.148	324.94	726.665
4.41711	11.0428	-583.742	328.534	706.298
4.42378	11.0594	-575.355	334.524	711.09
4.43044	11.0761	-578.95	353.692	702.704
4.43711	11.0928	-570.563	352.494	717.08
4.44378	11.1094	-570.563	353.692	712.288
4.45045	11.1261	-578.95	348.9	736.249
4.45711	11.1428	-574.157	358.484	731.457
4.46378	11.1594	-570.563	347.702	736.249
4.47045	11.1761	-569.365	358.484	739.843
4.47711	11.1928	-556.186	352.494	750.626
4.48378	11.2095	-559.781	348.9	749.428
4.49045	11.2261	-569.365	339.316	745.834
4.49712	11.2428	-575.355	342.91	745.834
4.50378	11.2595	-570.563	334.524	741.041
4.51045	11.2761	-565.771	334.524	745.834
4.51712	11.2928	-564.573	333.326	744.635
4.52379	11.3095	-565.771	338.118	730.259
4.53045	11.3261	-554.988	334.524	735.051
4.53712	11.3428	-551.394	333.326	731.457
4.54379	11.3595	-556.186	333.326	730.259
4.55046	11.3761	-551.394	344.108	726.665
4.55712	11.3928	-556.186	348.9	730.259
4.56379	11.4095	-554.988	348.9	749.428
4.57046	11.4261	-554.988	348.9	744.635
4.57712	11.4428	-554.988	333.326	755.418
4.58379	11.4595	-556.186	329.732	744.635
4.59046	11.4761	-554.988	348.9	745.834
4.59713	11.4928	-551.394	348.9	736.249
4.60379	11.5095	-554.988	334.524	730.259
4.61046	11.5262	-546.602	333.326	730.259
4.61713	11.5428	-550.196	333.326	736.249
4.6238	11.5595	-535.82	334.524	739.843
4.63046	11.5762	-535.82	342.91	730.259
4.63713	11.5928	-527.433	342.91	731.457
4.6438	11.6095	-531.027	339.316	744.635
4.65047	11.6262	-532.225	342.91	739.843
4.65713	11.6428	-537.018	338.118	730.259
4.6638	11.6595	-531.027	329.732	730.259
4.67047	11.6762	-537.018	334.524	726.665
4.67713	11.6928	-535.82	338.118	739.843
4.6838	11.7095	-546.602	339.316	745.834
4.69047	11.7262	-554.988	344.108	739.843
4.69714	11.7428	-545.404	338.118	754.22
4.7038	11.7595	-531.027	334.524	739.843
4.71047	11.7762	-541.81	338.118	735.051
4.71714	11.7928	-550.196	338.118	745.834
4.72381	11.8095	-546.602	348.9	754.22
4.73047	11.8262	-526.235	353.692	744.635
4.73714	11.8429	-537.018	348.9	749.428
4.74381	11.8595	-540.612	348.9	739.843
4.75048	11.8762	-537.018	357.286	730.259
4.75714	11.8929	-527.433	352.494	730.259
4.76381	11.9095	-532.225	334.524	735.051
4.77048	11.9262	-526.235	342.91	730.259
4.77714	11.9429	-517.849	344.108	736.249
4.78381	11.9595	-513.057	324.94	736.249
4.79048	11.9762	-516.651	323.742	730.259
4.79715	11.9929	-508.264	353.692	731.457
4.80381	12.0095	-507.066	334.524	731.457
4.81048	12.0262	-507.066	339.316	726.665
4.81715	12.0429	-508.264	339.316	735.051
4.82382	12.0595	-498.68	334.524	735.051
4.83048	12.0762	-502.274	333.326	749.428
4.83715	12.0929	-497.482	329.732	730.259
4.84382	12.1095	-497.482	329.732	731.457
4.85049	12.1262	-498.68	333.326	735.051
4.85715	12.1429	-516.651	329.732	730.259
4.86382	12.1595	-507.066	338.118	754.22
4.87049	12.1762	-511.858	333.326	750.626
4.87715	12.1929	-513.057	333.326	730.259
4.88382	12.2096	-511.858	339.316	730.259
4.89049	12.2262	-508.264	338.118	736.249
4.89716	12.2429	-513.057	353.692	730.259
4.90382	12.2596	-508.264	342.91	735.051
4.91049	12.2762	-511.858	363.277	730.259
4.91716	12.2929	-503.472	352.494	735.051
4.92383	12.3096	-507.066	357.286	731.457
4.93049	12.3262	-513.057	348.9	736.249
4.93716	12.3429	-513.057	344.108	730.259
4.94383	12.3596	-507.066	348.9	735.051
4.9505	12.3762	-498.68	358.484	730.259
4.95716	12.3929	-497.482	352.494	731.457
4.96383	12.4096	-497.482	357.286	730.259
4.9705	12.4262	-489.095	347.702	721.873
4.97716	12.4429	-489.095	344.108	726.665
4.98383	12.4596	-498.68	339.316	725.467
4.9905	12.4762	-489.095	348.9	721.873
4.99717	12.4929	-484.303	362.078	739.843
5.00383	12.5096	-483.105	363.277	730.259
5.0105	12.5263	-469.927	342.91	721.873
5.01717	12.5429	-493.888	357.286	730.259
5.02384	12.5596	-473.521	339.316	730.259
5.0305	12.5763	-478.313	344.108	726.665
5.03717	12.5929	-468.729	347.702	730.259
5.04384	12.6096	-473.521	342.91	725.467
5.05051	12.6263	-474.719	347.702	726.665
5.05717	12.6429	-473.521	348.9	730.259
5.06384	12.6596	-489.095	342.91	712.288
5.07051	12.6763	-489.095	334.524	715.882
5.07717	12.6929	-473.521	342.91	725.467
5.08384	12.7096	-468.729	344.108	725.467
5.09051	12.7263	-468.729	352.494	726.665
5.09718	12.7429	-465.134	352.494	726.665
5.10384	12.7596	-465.134	348.9	721.873
5.11051	12.7763	-468.729	334.524	717.08
5.11718	12.7929	-484.303	348.9	717.08
5.12385	12.8096	-478.313	348.9	711.09
5.13051	12.8263	-468.729	333.326	725.467
5.13718	12.843	-478.313	338.118	721.873
5.14385	12.8596	-479.511	338.118	726.665
5.15052	12.8763	-474.719	328.534	720.675
5.15718	12.893	-474.719	329.732	725.467
5.16385	12.9096	-469.927	329.732	720.675
5.17052	12.9263	-465.134	334.524	717.08
5.17718	12.943	-465.134	347.702	715.882
5.18385	12.9596	-468.729	333.326	717.08
5.19052	12.9763	-473.521	329.732	736.249
5.19719	12.993	-469.927	333.326	735.051
5.20385	13.0096	-463.936	334.524	725.467
5.21052	13.0263	-468.729	329.732	717.08
5.21719	13.043	-468.729	334.524	711.09
5.22386	13.0596	-455.55	347.702	712.288
5.23052	13.0763	-455.55	338.118	712.288
5.23719	13.093	-449.56	333.326	711.09
5.24386	13.1096	-455.55	333.326	711.09
5.25053	13.1263	-463.936	329.732	711.09
5.25719	13.143	-463.936	329.732	707.496
5.26386	13.1596	-460.342	320.148	712.288
5.27053	13.1763	-473.521	347.702	711.09
5.27719	13.193	-454.352	339.316	715.882
5.28386	13.2097	-459.144	338.118	717.08
5.29053	13.2263	-459.144	333.326	707.496
5.2972	13.243	-454.352	333.326	730.259
5.30386	13.2597	-465.134	334.524	720.675
5.31053	13.2763	-468.729	339.316	717.08
5.3172	13.293	-469.927	348.9	720.675
5.32387	13.3097	-468.729	348.9	712.288
5.33053	13.3263	-469.927	338.118	715.882
5.3372	13.343	-459.144	338.118	736.249
5.34387	13.3597	-455.55	339.316	730.259
5.35054	13.3763	-463.936	347.702	731.457
5.3572	13.393	-460.342	338.118	731.457
5.36387	13.4097	-455.55	339.316	736.249
5.37054	13.4263	-460.342	338.118	730.259
5.3772	13.443	-450.758	344.108	715.882
5.38387	13.4597	-435.183	339.316	726.665
5.39054	13.4763	-449.56	344.108	726.665
5.39721	13.493	-445.966	342.91	726.665
5.40387	13.5097	-441.173	339.316	720.675
5.41054	13.5264	-441.173	334.524	735.051
5.41721	13.543	-441.173	329.732	731.457
5.42388	13.5597	-441.173	328.534	735.051
5.43054	13.5764	-441.173	329.732	720.675
5.43721	13.593	-430.391	333.326	725.467
5.44388	13.6097	-412.42	333.326	717.08
5.45055	13.6264	-422.004	348.9	706.298
5.45721	13.643	-426.797	348.9	711.09
5.46388	13.6597	-422.004	352.494	712.288
5.47055	13.6764	-417.212	334.524	715.882
5.47721	13.693	-422.004	338.118	712.288
5.48388	13.7097	-422.004	334.524	711.09
5.49055	13.7264	-425.599	347.702	707.496
5.49722	13.743	-431.589	348.9	717.08
5.50388	13.7597	-430.391	347.702	721.873
5.51055	13.7764	-436.381	348.9	730.259
5.51722	13.793	-435.183	338.118	726.665
5.52389	13.8097	-441.173	344.108	731.457
5.53055	13.8264	-444.767	334.524	735.051
5.53722	13.8431	-430.391	338.118	730.259
5.54389	13.8597	-431.589	339.316	720.675
5.55056	13.8764	-426.797	333.326	715.882
5.55722	13.8931	-435.183	348.9	730.259
5.56389	13.9097	-431.589	348.9	720.675
5.57056	13.9264	-436.381	348.9	730.259
5.57722	13.9431	-436.381	334.524	731.457
5.58389	13.9597	-431.589	334.524	730.259
5.59056	13.9764	-412.42	339.316	736.249
5.59723	13.9931	-426.797	357.286	717.08
5.60389	14.0097	-435.183	357.286	712.288
5.61056	14.0264	-426.797	348.9	715.882
5.61723	14.0431	-417.212	348.9	717.08
5.6239	14.0597	-430.391	344.108	717.08
5.63056	14.0764	-416.014	334.524	720.675
5.63723	14.0931	-412.42	347.702	721.873
5.6439	14.1097	-416.014	342.91	725.467
5.65057	14.1264	-439.975	342.91	731.457
5.65723	14.1431	-430.391	334.524	720.675
5.6639	14.1597	-439.975	333.326	726.665
5.67057	14.1764	-430.391	333.326	730.259
5.67723	14.1931	-435.183	338.118	730.259
5.6839	14.2098	-425.599	342.91	726.665
5.69057	14.2264	-425.599	362.078	721.873
5.69724	14.2431	-441.173	357.286	726.665
5.7039	14.2598	-412.42	353.692	715.882
5.71057	14.2764	-416.014	334.524	725.467
5.71724	14.2931	-412.42	339.316	721.873
5.72391	14.3098	-398.043	352.494	720.675
5.73057	14.3264	-407.628	347.702	735.051
5.73724	14.3431	-402.836	347.702	731.457
5.74391	14.3598	-407.628	348.9	720.675
5.75058	14.3764	-412.42	358.484	725.467
5.75724	14.3931	-416.014	344.108	725.467
5.76391	14.4098	-412.42	344.108	721.873
5.77058	14.4264	-411.222	344.108	720.675
5.77724	14.4431	-411.222	339.316	735.051
5.78391	14.4598	-401.638	348.9	735.051
5.79058	14.4764	-411.222	347.702	721.873
5.79725	14.4931	-412.42	348.9	715.882
5.80391	14.5098	-416.014	362.078	720.675
5.81058	14.5265	-412.42	348.9	721.873
5.81725	14.5431	-412.42	348.9	726.665
5.82392	14.5598	-412.42	348.9	735.051
5.83058	14.5765	-416.014	347.702	759.012
5.83725	14.5931	-417.212	342.91	778.181
5.84392	14.6098	-411.222	342.91	765.002
5.85059	14.6265	-416.014	344.108	755.418
5.85725	14.6431	-420.806	342.91	760.21
5.86392	14.6598	-422.004	344.108	760.21
5.87059	14.6765	-422.004	344.108	765.002
5.87725	14.6931	-412.42	344.108	760.21
5.88392	14.7098	-420.806	342.91	779.379
5.89059	14.7265	-416.014	348.9	787.765
5.89726	14.7431	-412.42	342.91	773.389
5.90392	14.7598	-401.638	347.702	778.181
5.91059	14.7765	-416.014	348.9	792.557
5.91726	14.7931	-411.222	357.286	787.765
5.92393	14.8098	-402.836	363.277	778.181
5.93059	14.8265	-406.43	358.484	769.794
5.93726	14.8432	-401.638	353.692	768.596
5.94393	14.8598	-396.845	348.9	759.012
5.9506	14.8765	-406.43	347.702	755.418
5.95726	14.8932	-402.836	348.9	755.418
5.96393	14.9098	-416.014	348.9	744.635
5.9706	14.9265	-416.014	362.078	731.457
5.97726	14.9432	-412.42	353.692	730.259
5.98393	14.9598	-416.014	353.692	726.665
5.9906	14.9765	-412.42	339.316	744.635
5.99727	14.9932	-412.42	357.286	721.873
6.00393	15.0098	-406.43	344.108	715.882
6.0106	15.0265	-412.42	344.108	731.457
6.01727	15.0432	-412.42	342.91	730.259
6.02394	15.0598	-402.836	357.286	730.259
6.0306	15.0765	-411.222	347.702	731.457
6.03727	15.0932	-406.43	342.91	711.09
6.04394	15.1098	-383.667	352.494	715.882
6.05061	15.1265	-358.508	348.9	712.288
6.05727	15.1432	-364.498	348.9	730.259
6.06394	15.1598	-378.874	338.118	707.496
6.07061	15.1765	-387.261	358.484	715.882
6.07727	15.1932	-378.874	362.078	721.873
6.08394	15.2099	-396.845	358.484	725.467
6.09061	15.2265	-388.459	357.286	721.873
6.09728	15.2432	-388.459	353.692	730.259
6.10394	15.2599	-396.845	348.9	726.665
6.11061	15.2765	-383.667	344.108	730.259
6.11728	15.2932	-378.874	342.91	730.259
6.12395	15.3099	-374.082	342.91	731.457
6.13061	15.3265	-374.082	339.316	735.051
6.13728	15.3432	-358.508	338.118	730.259
6.14395	15.3599	-350.121	368.069	725.467
6.15062	15.3765	-344.131	386.039	720.675
6.15728	15.3932	-350.121	377.653	707.496
6.16395	15.4099	-354.913	371.663	712.288
6.17062	15.4265	-354.913	366.871	720.675
6.17728	15.4432	-378.874	368.069	720.675
6.18395	15.4599	-383.667	368.069	715.882
6.19062	15.4765	-388.459	381.247	717.08
6.19729	15.4932	-393.251	395.623	721.873
6.20395	15.5099	-383.667	392.029	735.051
6.21062	15.5266	-383.667	396.821	736.249
6.21729	15.5432	-383.667	405.207	725.467
6.22396	15.5599	-396.845	392.029	726.665
6.23062	15.5766	-388.459	396.821	725.467
6.23729	15.5932	-402.836	406.405	725.467
6.24396	15.6099	-398.043	406.405	726.665
6.25063	15.6266	-401.638	396.821	735.051
6.25729	15.6432	-402.836	376.455	730.259
6.26396	15.6599	-416.014	372.861	726.665
6.27063	15.6766	-412.42	362.078	745.834
6.27729	15.6932	-401.638	362.078	744.635
6.28396	15.7099	-396.845	357.286	749.428
6.29063	15.7266	-398.043	352.494	739.843
6.2973	15.7432	-396.845	344.108	739.843
6.30396	15.7599	-401.638	344.108	741.041
6.31063	15.7766	-396.845	342.91	730.259
6.3173	15.7932	-396.845	353.692	730.259
6.32397	15.8099	-393.251	352.494	731.457
6.33063	15.8266	-387.261	347.702	726.665
6.3373	15.8433	-393.251	348.9	721.873
6.34397	15.8599	-401.638	348.9	726.665
6.35064	15.8766	-392.053	348.9	725.467
6.3573	15.8933	-398.043	334.524	721.873
6.36397	15.9099	-396.845	339.316	712.288
6.37064	15.9266	-387.261	353.692	712.288
6.3773	15.9433	-378.874	353.692	717.08
6.38397	15.9599	-377.676	339.316	720.675
6.39064	15.9766	-374.082	338.118	720.675
6.39731	15.9933	-369.29	342.91	717.08
6.40397	16.0099	-369.29	342.91	715.882
6.41064	16.0266	-364.498	339.316	715.882
6.41731	16.0433	-372.884	357.286	715.882
6.42398	16.0599	-364.498	342.91	725.467
6.43064	16.0766	-372.884	348.9	730.259
6.43731	16.0933	-377.676	352.494	726.665
6.44398	16.1099	-382.469	348.9	726.665
6.45065	16.1266	-382.469	329.732	730.259
6.45731	16.1433	-368.092	323.742	731.457
6.46398	16.1599	-364.498	338.118	730.259
6.47065	16.1766	-378.874	333.326	730.259
6.47731	16.1933	-383.667	338.118	730.259
6.48398	16.21	-378.874	344.108	730.259
6.49065	16.2266	-369.29	339.316	726.665
6.49732	16.2433	-383.667	333.326	726.665
6.50398	16.26	-378.874	338.118	731.457
6.51065	16.2766	-383.667	339.316	735.051
6.51732	16.2933	-383.667	329.732	745.834
6.52399	16.31	-383.667	333.326	741.041
6.53065	16.3266	-383.667	339.316	726.665
6.53732	16.3433	-383.667	339.316	725.467
6.54399	16.36	-388.459	338.118	741.041
6.55066	16.3766	-383.667	339.316	726.665
6.55732	16.3933	-388.459	334.524	735.051
6.56399	16.41	-388.459	339.316	745.834
6.57066	16.4266	-383.667	338.118	754.22
6.57732	16.4433	-364.498	339.316	744.635
6.58399	16.46	-359.706	342.91	749.428
6.59066	16.4766	-354.913	344.108	749.428
6.59733	16.4933	-348.923	333.326	750.626
6.60399	16.51	-339.339	334.524	755.418
6.61066	16.5267	-353.715	334.524	759.012
6.61733	16.5433	-353.715	329.732	741.041
6.624	16.56	-354.913	323.742	731.457
6.63066	16.5767	-348.923	329.732	735.051
6.63733	16.5933	-330.952	334.524	730.259
6.644	16.61	-334.546	347.702	736.249
6.65067	16.6267	-339.339	347.702	739.843
6.65733	16.6433	-339.339	344.108	739.843
6.664	16.66	-329.754	348.9	730.259
6.67067	16.6767	-329.754	328.534	735.051
6.67733	16.6933	-329.754	329.732	731.457
6.684	16.71	-335.745	339.316	730.259
6.69067	16.7267	-330.952	338.118	731.457
6.69734	16.7433	-339.339	342.91	735.051
6.704	16.76	-354.913	334.524	730.259
6.71067	16.7767	-334.546	338.118	730.259
6.71734	16.7933	-335.745	347.702	739.843
6.72401	16.81	-339.339	348.9	730.259
6.73067	16.8267	-339.339	342.91	735.051
6.73734	16.8434	-344.131	342.91	730.259
6.74401	16.86	-350.121	342.91	721.873
6.75068	16.8767	-339.339	344.108	730.259
6.75734	16.8934	-335.745	344.108	735.051
6.76401	16.91	-324.962	348.9	731.457
6.77068	16.9267	-335.745	353.692	725.467
6.77734	16.9434	-334.546	347.702	725.467
6.78401	16.96	-339.339	348.9	730.259
6.79068	16.9767	-330.952	333.326	726.665
6.79735	16.9934	-340.537	328.534	721.873
6.80401	17.01	-340.537	333.326	721.873
6.81068	17.0267	-335.745	334.524	715.882
6.81735	17.0434	-339.339	334.524	712.288
6.82402	17.06	-339.339	333.326	711.09
6.83068	17.0767	-334.546	339.316	720.675
6.83735	17.0934	-315.378	334.524	712.288
6.84402	17.11	-320.17	333.326	735.051
6.85069	17.1267	-305.793	333.326	717.08
6.85735	17.1434	-311.783	333.326	731.457
6.86402	17.1601	-306.991	334.524	726.665
6.87069	17.1767	-302.199	348.9	717.08
6.87735	17.1934	-296.209	342.91	717.08
6.88402	17.2101	-297.407	339.316	720.675
6.89069	17.2267	-301.001	338.118	739.843
6.89736	17.2434	-292.615	344.108	736.249
6.90402	17.2601	-287.822	342.91	726.665
6.91069	17.2767	-301.001	338.118	730.259
6.91736	17.2934	-292.615	333.326	730.259
6.92403	17.3101	-287.822	338.118	715.882
6.93069	17.3267	-283.03	338.118	735.051
6.93736	17.3434	-278.238	334.524	744.635
6.94403	17.3601	-287.822	333.326	741.041
6.9507	17.3767	-296.209	339.316	736.249
6.95736	17.3934	-297.407	342.91	731.457
6.96403	17.4101	-297.407	344.108	736.249
6.9707	17.4267	-291.417	338.118	735.051
6.97736	17.4434	-297.407	338.118	741.041
6.98403	17.4601	-283.03	344.108	730.259
6.9907	17.4767	-301.001	347.702	741.041
6.99737	17.4934	-306.991	342.91	739.843
7.00403	17.5101	-301.001	334.524	739.843
7.0107	17.5268	-296.209	339.316	735.051
7.01737	17.5434	-292.615	342.91	739.843
7.02404	17.5601	-301.001	344.108	745.834
7.0307	17.5768	-277.04	353.692	736.249
7.03737	17.5934	-283.03	357.286	736.249
7.04404	17.6101	-291.417	352.494	735.051
7.05071	17.6268	-287.822	339.316	744.635
7.05737	17.6434	-278.238	338.118	731.457
7.06404	17.6601	-278.238	339.316	730.259
7.07071	17.6768	-278.238	334.524	749.428
7.07737	17.6934	-283.03	334.524	749.428
7.08404	17.7101	-292.615	339.316	749.428
7.09071	17.7268	-292.615	338.118	754.22
7.09738	17.7434	-283.03	334.524	744.635
7.10404	17.7601	-278.238	329.732	741.041
7.11071	17.7768	-267.455	333.326	726.665
7.11738	17.7934	-272.248	334.524	725.467
7.12405	17.8101	-268.654	334.524	744.635
7.13071	17.8268	-268.654	333.326	741.041
7.13738	17.8435	-268.654	334.524	744.635
7.14405	17.8601	-263.861	338.118	744.635
7.15072	17.8768	-272.248	342.91	745.834
7.15738	17.8935	-278.238	339.316	744.635
7.16405	17.9101	-272.248	348.9	744.635
7.17072	17.9268	-257.871	353.692	745.834
7.17738	17.9435	-253.079	348.9	730.259
7.18405	17.9601	-257.871	348.9	736.249
7.19072	17.9768	-248.287	339.316	730.259
7.19739	17.9935	-248.287	333.326	745.834
7.20405	18.0101	-263.861	334.524	726.665
7.21072	18.0268	-257.871	334.524	730.259
7.21739	18.0435	-257.871	342.91	730.259
7.22406	18.0601	-254.277	338.118	726.665
7.23072	18.0768	-239.9	334.524	741.041
7.23739	18.0935	-238.702	334.524	749.428
7.24406	18.1101	-239.9	338.118	745.834
7.25073	18.1268	-239.9	334.524	750.626
7.25739	18.1435	-249.485	347.702	754.22
7.26406	18.1602	-257.871	339.316	745.834
7.27073	18.1768	-249.485	347.702	749.428
7.27739	18.1935	-257.871	348.9	750.626
7.28406	18.2102	-243.494	347.702	750.626
7.29073	18.2268	-249.485	348.9	763.804
7.2974	18.2435	-243.494	348.9	741.041
7.30406	18.2602	-235.108	357.286	754.22
7.31073	18.2768	-243.494	338.118	749.428
7.3174	18.2935	-238.702	339.316	749.428
7.32407	18.3102	-235.108	334.524	745.834
7.33073	18.3268	-239.9	339.316	739.843
7.3374	18.3435	-239.9	334.524	749.428
7.34407	18.3602	-244.692	352.494	736.249
7.35074	18.3768	-243.494	348.9	730.259
7.3574	18.3935	-238.702	339.316	721.873
7.36407	18.4102	-235.108	338.118	730.259
7.37074	18.4268	-235.108	328.534	730.259
7.3774	18.4435	-243.494	328.534	725.467
7.38407	18.4602	-220.731	348.9	721.873
7.39074	18.4768	-214.741	347.702	720.675
7.39741	18.4935	-225.524	334.524	717.08
7.40407	18.5102	-214.741	334.524	715.882
7.41074	18.5269	-225.524	334.524	712.288
7.41741	18.5435	-215.939	334.524	712.288
7.42408	18.5602	-215.939	338.118	730.259
7.43074	18.5769	-206.355	339.316	721.873
7.43741	18.5935	-214.741	334.524	730.259
7.44408	18.6102	-209.949	339.316	711.09
7.45075	18.6269	-185.988	352.494	711.09
7.45741	18.6435	-185.988	348.9	711.09
7.46408	18.6602	-200.364	339.316	715.882
7.47075	18.6769	-196.77	338.118	715.882
7.47741	18.6935	-196.77	334.524	712.288
7.48408	18.7102	-201.563	338.118	706.298
7.49075	18.7269	-196.77	338.118	717.08
7.49742	18.7435	-201.563	339.316	717.08
7.50408	18.7602	-196.77	366.871	717.08
7.51075	18.7769	-181.196	353.692	721.873
7.51742	18.7935	-176.403	348.9	721.873
7.52409	18.8102	-181.196	342.91	720.675
7.53075	18.8269	-168.017	342.91	717.08
7.53742	18.8436	-163.225	344.108	717.08
7.54409	18.8602	-163.225	348.9	721.873
7.55076	18.8769	-168.017	352.494	731.457
7.55742	18.8936	-171.611	348.9	730.259
7.56409	18.9102	-177.601	333.326	726.665
7.57076	18.9269	-177.601	344.108	721.873
7.57742	18.9436	-177.601	344.108	726.665
7.58409	18.9602	-166.819	348.9	725.467
7.59076	18.9769	-158.433	339.316	712.288
7.59743	18.9936	-158.433	339.316	707.496
7.60409	19.0102	-157.235	339.316	720.675
7.61076	19.0269	-163.225	334.524	717.08
7.61743	19.0436	-168.017	334.524	730.259
7.6241	19.0602	-162.027	338.118	726.665
7.63076	19.0769	-166.819	334.524	726.665
7.63743	19.0936	-163.225	329.732	711.09
7.6441	19.1102	-172.809	333.326	712.288
7.65077	19.1269	-158.433	338.118	711.09
7.65743	19.1436	-177.601	328.534	711.09
7.6641	19.1603	-172.809	338.118	712.288
7.67077	19.1769	-158.433	342.91	707.496
7.67743	19.1936	-158.433	339.316	706.298
7.6841	19.2103	-162.027	347.702	702.704
7.69077	19.2269	-158.433	344.108	712.288
7.69744	19.2436	-148.848	347.702	707.496
7.7041	19.2603	-142.858	338.118	712.288
7.71077	19.2769	-128.481	333.326	707.496
7.71744	19.2936	-123.689	329.732	711.09
7.72411	19.3103	-129.679	333.326	715.882
7.73077	19.3269	-129.679	333.326	721.873
7.73744	19.3436	-124.887	338.118	720.675
7.74411	19.3603	-124.887	339.316	712.288
7.75078	19.3769	-144.056	334.524	711.09
7.75744	19.3936	-138.066	333.326	720.675
7.76411	19.4103	-129.679	329.732	720.675
7.77078	19.4269	-123.689	333.326	720.675
7.77744	19.4436	-124.887	334.524	730.259
7.78411	19.4603	-120.095	338.118	730.259
7.79078	19.4769	-104.52	328.534	731.457
7.79745	19.4936	-99.7279	339.316	730.259
7.80411	19.5103	-96.1338	334.524	731.457
7.81078	19.527	-94.9357	342.91	730.259
7.81745	19.5436	-91.3415	333.326	735.051
7.82412	19.5603	-76.9649	338.118	726.665
7.83078	19.577	-66.1824	328.534	730.259
7.83745	19.5936	-51.8058	333.326	735.051
7.84412	19.6103	-32.6369	333.326	731.457
7.85079	19.627	-18.2603	333.326	730.259
7.85745	19.6436	-18.2603	329.732	730.259
7.86412	19.6603	-19.4583	328.534	730.259
7.87079	19.677	-18.2603	324.94	715.882
7.87745	19.6936	-19.4583	333.326	715.882
7.88412	19.7103	-18.2603	333.326	715.882
7.89079	19.727	-18.2603	347.702	721.873
7.89746	19.7436	-19.4583	334.524	736.249
7.90412	19.7603	-13.468	339.316	730.259
7.91079	19.777	4.50277	348.9	730.259
7.91746	19.7936	20.0775	348.9	730.259
7.92413	19.8103	28.4639	348.9	730.259
7.93079	19.827	33.2561	348.9	730.259
7.93746	19.8437	20.0775	352.494	730.259
7.94413	19.8603	34.4541	352.494	731.457
7.9508	19.877	24.8697	348.9	730.259
7.95746	19.8937	4.50277	353.692	735.051
7.96413	19.9103	20.0775	353.692	731.457
7.9708	19.927	15.2853	342.91	726.665
7.97746	19.9437	9.29499	334.524	730.259
7.98413	19.9603	15.2853	324.94	715.882
7.9908	19.977	29.6619	339.316	707.496
7.99747	19.9937	29.6619	338.118	712.288
8.00413	20.0103	24.8697	334.524	715.882
8.0108	20.027	23.6716	338.118	707.496
8.01747	20.0437	29.6619	347.702	706.298
8.02414	20.0603	28.4639	333.326	721.873
8.0308	20.077	38.0483	333.326	726.665
8.03747	20.0937	38.0483	333.326	707.496
8.04414	20.1103	39.2463	334.524	706.298
8.05081	20.127	34.4541	329.732	711.09
8.05747	20.1437	38.0483	333.326	707.496
8.06414	20.1604	47.6327	339.316	712.288
8.07081	20.177	47.6327	329.732	717.08
8.07747	20.1937	34.4541	338.118	715.882
8.08414	20.2104	24.8697	329.732	717.08
8.09081	20.227	23.6716	352.494	726.665
8.09748	20.2437	20.0775	338.118	725.467
8.10414	20.2604	10.493	353.692	725.467
8.11081	20.277	5.70083	352.494	711.09
8.11748	20.2937	-9.87388	357.286	707.496
8.12415	20.3104	-5.08166	348.9	702.704
8.13081	20.327	-13.468	348.9	706.298
8.13748	20.3437	-13.468	358.484	707.496
8.14415	20.3604	-8.67582	352.494	706.298
8.15082	20.377	0.90861	358.484	712.288
8.15748	20.3937	0.90861	348.9	711.09
8.16415	20.4104	10.493	353.692	717.08
8.17082	20.427	10.493	348.9	715.882
8.17748	20.4437	10.493	348.9	706.298
8.18415	20.4604	15.2853	334.524	701.506
8.19082	20.477	15.2853	333.326	701.506
8.19749	20.4937	18.8794	347.702	702.704
8.20415	20.5104	14.0872	347.702	702.704
8.21082	20.5271	14.0872	347.702	707.496
8.21749	20.5437	5.70083	344.108	702.704
8.22416	20.5604	-5.08166	344.108	696.714
8.23082	20.5771	-5.08166	344.108	701.506
8.23749	20.5937	-3.88361	329.732	697.912
8.24416	20.6104	-3.88361	334.524	701.506
8.25083	20.6271	-0.289444	333.326	706.298
8.25749	20.6437	9.29499	334.524	702.704
8.26416	20.6604	10.493	344.108	701.506
8.27083	20.6771	18.8794	344.108	702.704
8.27749	20.6937	10.493	347.702	702.704
8.28416	20.7104	10.493	348.9	712.288
8.29083	20.7271	20.0775	344.108	712.288
8.2975	20.7437	24.8697	348.9	712.288
8.30416	20.7604	9.29499	348.9	715.882
8.31083	20.7771	20.0775	339.316	707.496
8.3175	20.7937	33.2561	348.9	711.09
8.32417	20.8104	9.29499	344.108	717.08
8.33083	20.8271	15.2853	342.91	711.09
8.3375	20.8438	15.2853	339.316	711.09
8.34417	20.8604	23.6716	333.326	725.467
8.35084	20.8771	33.2561	333.326	721.873
8.3575	20.8938	28.4639	342.91	730.259
8.36417	20.9104	29.6619	357.286	726.665
8.37084	20.9271	23.6716	353.692	725.467
8.3775	20.9438	28.4639	352.494	730.259
8.38417	20.9604	28.4639	352.494	735.051
8.39084	20.9771	28.4639	352.494	715.882
8.39751	20.9938	24.8697	347.702	715.882
8.40417	21.0104	15.2853	333.326	715.882
8.41084	21.0271	28.4639	347.702	707.496
8.41751	21.0438	33.2561	348.9	712.288
8.42418	21.0604	38.0483	334.524	707.496
8.43084	21.0771	39.2463	329.732	707.496
8.43751	21.0938	44.0386	338.118	706.298
8.44418	21.1104	48.8308	344.108	715.882
8.45085	21.1271	38.0483	338.118	717.08
8.45751	21.1438	29.6619	344.108	715.882
8.46418	21.1605	39.2463	348.9	712.288
8.47085	21.1771	53.623	342.91	701.506
8.47751	21.1938	58.4152	344.108	701.506
8.48418	21.2105	72.7918	344.108	707.496
8.49085	21.2271	77.5841	344.108	702.704
8.49752	21.2438	81.1782	344.108	706.298
8.50418	21.2605	72.7918	357.286	712.288
8.51085	21.2771	66.8016	353.692	711.09
8.51752	21.2938	72.7918	362.078	702.704
8.52419	21.3105	76.386	358.484	701.506
8.53085	21.3271	67.9996	339.316	707.496
8.53752	21.3438	71.5938	344.108	712.288
8.54419	21.3605	67.9996	338.118	715.882
8.55086	21.3771	72.7918	342.91	707.496
8.55752	21.3938	85.9704	339.316	701.506
8.56419	21.4105	81.1782	342.91	706.298
8.57086	21.4271	81.1782	339.316	721.873
8.57752	21.4438	96.7529	348.9	726.665
8.58419	21.4605	105.139	348.9	721.873
8.59086	21.4771	95.5549	352.494	701.506
8.59753	21.4938	100.347	362.078	712.288
8.60419	21.5105	119.516	362.078	712.288
8.61086	21.5272	125.506	366.871	707.496
8.61753	21.5438	144.675	362.078	706.298
8.6242	21.5605	149.467	366.871	730.259
8.63086	21.5772	153.061	352.494	712.288
8.63753	21.5938	157.854	344.108	707.496
8.6442	21.6105	162.646	347.702	725.467
8.65087	21.6272	143.477	342.91	735.051
8.65753	21.6438	144.675	339.316	726.665
8.6642	21.6605	138.685	347.702	725.467
8.67087	21.6772	135.091	339.316	730.259
8.67753	21.6938	138.685	347.702	725.467
8.6842	21.7105	124.308	347.702	715.882
8.69087	21.7272	120.714	363.277	717.08
8.69754	21.7438	125.506	348.9	721.873
8.7042	21.7605	139.883	352.494	721.873
8.71087	21.7772	178.221	352.494	707.496
8.71754	21.7938	181.815	352.494	725.467
8.72421	21.8105	181.815	347.702	725.467
8.73087	21.8272	178.221	347.702	717.08
8.73754	21.8439	178.221	352.494	702.704
8.74421	21.8605	177.023	362.078	702.704
8.75088	21.8772	178.221	348.9	701.506
8.75754	21.8939	178.221	348.9	701.506
8.76421	21.9105	173.428	348.9	707.496
8.77088	21.9272	163.844	353.692	706.298
8.77754	21.9439	178.221	357.286	711.09
8.78421	21.9605	186.607	363.277	707.496
8.79088	21.9772	178.221	376.455	711.09
8.79755	21.9939	172.23	357.286	706.298
8.80421	22.0105	177.023	347.702	707.496
8.81088	22.0272	173.428	344.108	706.298
8.81755	22.0439	178.221	348.9	702.704
8.82422	22.0605	178.221	344.108	707.496
8.83088	22.0772	178.221	347.702	706.298
8.83755	22.0939	178.221	353.692	706.298
8.84422	22.1105	168.636	348.9	707.496
8.85089	22.1272	168.636	353.692	725.467
8.85755	22.1439	178.221	357.286	725.467
8.86422	22.1606	192.597	358.484	730.259
8.87089	22.1772	187.805	357.286	739.843
8.87755	22.1939	196.191	377.653	730.259
8.88422	22.2106	206.974	366.871	726.665
8.89089	22.2272	215.36	366.871	730.259
8.89756	22.2439	226.143	372.861	726.665
8.90422	22.2606	234.529	352.494	730.259
8.91089	22.2772	258.49	353.692	726.665
8.91756	22.2939	263.282	352.494	717.08
8.92423	22.3106	264.48	348.9	712.288
8.93089	22.3272	274.065	352.494	725.467
8.93756	22.3439	263.282	348.9	726.665
8.94423	22.3606	263.282	358.484	730.259
8.9509	22.3772	277.659	347.702	725.467
8.95756	22.3939	301.62	362.078	720.675
8.96423	22.4106	311.205	353.692	712.288
8.9709	22.4272	315.997	352.494	711.09
8.97756	22.4439	312.403	348.9	701.506
8.98423	22.4606	311.205	348.9	706.298
8.9909	22.4772	315.997	347.702	721.873
8.99757	22.4939	307.61	366.871	717.08
9.00423	22.5106	307.61	357.286	725.467
9.0109	22.5273	312.403	368.069	726.665
9.01757	22.5439	311.205	362.078	730.259
9.02424	22.5606	312.403	347.702	706.298
9.0309	22.5773	330.373	347.702	712.288
9.03757	22.5939	336.364	348.9	717.08
9.04424	22.6106	373.503	362.078	721.873
9.05091	22.6273	397.464	362.078	730.259
9.05757	22.6439	407.049	358.484	730.259
9.06424	22.6606	427.416	362.078	715.882
9.07091	22.6773	456.169	362.078	730.259
9.07757	22.6939	480.13	358.484	715.882
9.08424	22.7106	489.715	348.9	717.08
9.09091	22.7273	518.468	348.9	721.873
9.09758	22.7439	546.023	353.692	712.288
9.10424	22.7606	561.598	353.692	725.467
9.11091	22.7773	566.39	352.494	731.457
9.11758	22.7939	560.4	348.9	736.249
9.12425	22.8106	560.4	353.692	736.249
9.13091	22.8273	542.429	357.286	741.041
9.13758	22.844	547.221	339.316	739.843
9.14425	22.8606	560.4	339.316	744.635
9.15092	22.8773	569.984	339.316	721.873
9.15758	22.894	579.569	348.9	730.259
9.16425	22.9106	584.361	353.692	721.873
9.17092	22.9273	603.53	357.286	721.873
9.17758	22.944	609.52	357.286	726.665
9.18425	22.9606	632.283	357.286	726.665
9.19092	22.9773	647.858	344.108	725.467
9.19759	22.994	656.244	342.91	736.249
9.20425	23.0106	657.442	347.702	731.457
9.21092	23.0273	643.066	348.9	730.259
9.21759	23.044	632.283	358.484	726.665
9.22426	23.0606	651.452	353.692	730.259
9.23092	23.0773	637.075	358.484	730.259
9.23759	23.094	638.273	342.91	720.675
9.24426	23.1106	652.65	347.702	725.467
9.25093	23.1273	665.829	342.91	720.675
9.25759	23.144	680.205	352.494	744.635
9.26426	23.1607	690.988	348.9	726.665
9.27093	23.1773	694.582	357.286	721.873
9.27759	23.194	704.166	362.078	725.467
9.28426	23.2107	723.335	353.692	739.843
9.29093	23.2273	728.127	358.484	736.249
9.2976	23.244	753.286	347.702	736.249
9.30426	23.2607	809.595	338.118	741.041
9.31093	23.2773	862.309	348.9	739.843
9.3176	23.294	906.637	348.9	739.843
9.32427	23.3107	959.352	348.9	731.457
9.33093	23.3273	988.105	348.9	726.665
9.3376	23.344	988.105	344.108	725.467
9.34427	23.3607	964.144	344.108	730.259
9.35094	23.3773	940.183	347.702	739.843
9.3576	23.394	958.154	352.494	745.834
9.36427	23.4107	991.699	358.484	749.428
9.37094	23.4273	1034.83	357.286	744.635
9.3776	23.444	1063.58	366.871	744.635
9.38427	23.4607	1073.17	348.9	750.626
9.39094	23.4773	1077.96	358.484	749.428
9.39761	23.494	1092.34	352.494	745.834
9.40427	23.5107	1088.74	344.108	749.428
9.41094	23.5274	1098.33	362.078	730.259
9.41761	23.544	1106.71	347.702	730.259
9.42428	23.5607	1097.13	348.9	726.665
9.43094	23.5774	1111.5	344.108	730.259
9.43761	23.594	1127.08	342.91	741.041
9.44428	23.6107	1169.01	344.108	726.665
9.45095	23.6274	1212.14	342.91	731.457
9.45761	23.644	1213.34	358.484	739.843
9.46428	23.6607	1203.75	357.286	739.843
9.47095	23.6774	1188.18	358.484	739.843
9.47761	23.694	1173.8	358.484	741.041
9.48428	23.7107	1169.01	344.108	730.259
9.49095	23.7274	1170.21	342.91	726.665
9.49762	23.744	1183.39	339.316	730.259
9.50428	23.7607	1170.21	344.108	739.843
9.51095	23.7774	1164.22	347.702	731.457
9.51762	23.794	1169.01	347.702	735.051
9.52429	23.8107	1202.56	366.871	730.259
9.53095	23.8274	1246.88	371.663	735.051
9.53762	23.8441	1318.77	357.286	741.041
9.54429	23.8607	1405.03	353.692	736.249
9.55096	23.8774	1485.3	352.494	730.259
9.55762	23.8941	1510.46	358.484	730.259
9.56429	23.9107	1528.43	362.078	750.626
9.57096	23.9274	1534.42	363.277	744.635
9.57762	23.9441	1553.59	362.078	735.051
9.58429	23.9607	1590.73	347.702	741.041
9.59096	23.9774	1619.48	348.9	741.041
9.59763	23.9941	1659.02	357.286	741.041
9.60429	24.0107	1700.95	368.069	741.041
9.61096	24.0274	1716.52	371.663	739.843
9.61763	24.0441	1721.31	362.078	745.834
9.6243	24.0607	1724.91	348.9	745.834
9.63096	24.0774	1696.15	352.494	750.626
9.63763	24.0941	1681.78	348.9	768.596
9.6443	24.1107	1687.77	352.494	784.171
9.65097	24.1274	1702.15	353.692	793.755
9.65763	24.1441	1720.12	368.069	779.379
9.6643	24.1608	1715.32	368.069	769.794
9.67097	24.1774	1697.35	371.663	768.596
9.67763	24.1941	1692.56	352.494	765.002
9.6843	24.2108	1702.15	363.277	765.002
9.69097	24.2274	1734.49	362.078	792.557
9.69764	24.2441	1777.62	357.286	792.557
9.7043	24.2608	1879.46	348.9	802.142
9.71097	24.2774	2012.44	348.9	788.963
9.71764	24.2941	2098.7	348.9	793.755
9.72431	24.3108	2170.58	352.494	797.35
9.73097	24.3274	2205.33	344.108	803.34
9.73764	24.3441	2258.04	348.9	793.755
9.74431	24.3608	2333.52	348.9	793.755
9.75098	24.3774	2416.19	347.702	787.765
9.75764	24.3941	2434.16	344.108	782.973
9.76431	24.4108	2443.74	348.9	768.596
9.77098	24.4274	2430.56	363.277	763.804
9.77764	24.4441	2435.35	358.484	763.804
9.78431	24.4608	2486.87	363.277	755.418
9.79098	24.4774	2525.21	362.078	749.428
9.79765	24.4941	2530	376.455	736.249
9.80431	24.5108	2486.87	363.277	739.843
9.81098	24.5275	2406.6	363.277	739.843
9.81765	24.5441	2282	357.286	739.843
9.82432	24.5608	2013.64	368.069	739.843
9.83098	24.5775	1777.62	363.277	736.249
9.83765	24.5941	1619.48	362.078	735.051
9.84432	24.6108	1553.59	362.078	735.051
9.85099	24.6275	1538.01	362.078	730.259
9.85765	24.6441	1582.34	362.078	735.051
9.86432	24.6608	1576.35	347.702	735.051
9.87099	24.6775	1547.6	347.702	739.843
9.87765	24.6941	1552.39	342.91	730.259
9.88432	24.7108	1630.26	362.078	730.259
9.89099	24.7275	1759.65	358.484	735.051
9.89766	24.7441	1897.43	357.286	736.249
9.90432	24.7608	1999.26	363.277	731.457
9.91099	24.7775	2127.45	352.494	730.259
9.91766	24.7941	2205.33	353.692	730.259
9.92433	24.8108	2210.12	347.702	725.467
9.93099	24.8275	2184.96	352.494	741.041
9.93766	24.8442	2093.91	347.702	744.635
9.94433	24.8608	1984.89	348.9	736.249
9.951	24.8775	1927.38	363.277	730.259
9.95766	24.8942	1883.05	390.831	731.457
9.96433	24.9108	1878.26	405.207	730.259
9.971	24.9275	1836.33	405.207	735.051
9.97766	24.9442	1788.41	387.237	725.467
9.98433	24.9608	1724.91	362.078	721.873
9.991	24.9775	1654.22	363.277	720.675
9.99767	24.9942	1595.52	372.861	717.08
10.0043	25.0108	1533.22	377.653	717.08
10.011	25.0275	1496.08	392.029	721.873
10.0177	25.0442	1467.33	390.831	715.882
10.0243	25.0608	1427.79	405.207	717.08
10.031	25.0775	1379.87	406.405	720.675
10.0377	25.0942	1357.11	409.999	726.665
10.0443	25.1108	1336.74	414.791	739.843
10.051	25.1275	1336.74	411.197	730.259
10.0577	25.1442	1337.94	406.405	736.249
10.0643	25.1609	1336.74	405.207	726.665
10.071	25.1775	1331.95	406.405	730.259
10.0777	25.1942	1333.14	386.039	726.665
10.0843	25.2109	1313.98	400.415	726.665
10.091	25.2275	1322.36	392.029	720.675
10.0977	25.2442	1352.31	366.871	721.873
10.1043	25.2609	1375.08	362.078	725.467
10.111	25.2775	1379.87	372.861	721.873
10.1177	25.2942	1360.7	366.871	720.675
10.1243	25.3109	1336.74	353.692	721.873
10.131	25.3275	1327.15	352.494	730.259
10.1377	25.3442	1360.7	344.108	725.467
10.1443	25.3609	1385.86	358.484	720.675
10.151	25.3775	1405.03	344.108	731.457
10.1577	25.3942	1400.24	342.91	739.843
10.1644	25.4109	1395.44	342.91	736.249
10.171	25.4275	1414.61	348.9	730.259
10.1777	25.4442	1389.45	334.524	721.873
10.1844	25.4609	1379.87	339.316	725.467
10.191	25.4775	1351.12	347.702	725.467
10.1977	25.4942	1318.77	334.524	721.873
10.2044	25.5109	1299.6	342.91	730.259
10.211	25.5276	1312.78	338.118	730.259
10.2177	25.5442	1333.14	342.91	731.457
10.2244	25.5609	1352.31	344.108	730.259
10.231	25.5776	1389.45	358.484	730.259
10.2377	25.5942	1446.96	358.484	730.259
10.2444	25.6109	1494.88	347.702	731.457
10.251	25.6276	1533.22	342.91	735.051
10.2577	25.6442	1558.38	347.702	731.457
10.2644	25.6609	1572.76	344.108	726.665
10.271	25.6776	1595.52	348.9	744.635
10.2777	25.6942	1605.1	348.9	725.467
10.2844	25.7109	1601.51	342.91	720.675
10.291	25.7276	1619.48	339.316	721.873
10.2977	25.7442	1643.44	338.118	730.259
10.3044	25.7609	1644.64	357.286	730.259
10.311	25.7776	1667.4	357.286	730.259
10.3177	25.7942	1715.32	344.108	735.051
10.3244	25.8109	1735.69	344.108	736.249
10.331	25.8276	1772.83	358.484	755.418
10.3377	25.8443	1802.78	353.692	755.418
10.3444	25.8609	1796.79	348.9	744.635
10.351	25.8776	1774.03	342.91	730.259
10.3577	25.8943	1772.83	352.494	730.259
10.3644	25.9109	1758.45	357.286	735.051
10.371	25.9276	1682.98	353.692	736.249
10.3777	25.9443	1567.96	338.118	739.843
10.3844	25.9609	1448.16	362.078	739.843
10.391	25.9776	1370.28	358.484	736.249
10.3977	25.9943	1327.15	357.286	739.843
10.4044	26.0109	1290.01	357.286	741.041
10.411	26.0276	1274.44	358.484	726.665
10.4177	26.0443	1274.44	353.692	726.665
10.4244	26.0609	1280.43	348.9	726.665
10.431	26.0776	1304.39	362.078	730.259
10.4377	26.0943	1322.36	357.286	750.626
10.4444	26.1109	1323.56	352.494	750.626
10.451	26.1276	1317.57	348.9	749.428
10.4577	26.1443	1290.01	348.9	755.418
10.4644	26.161	1269.65	357.286	750.626
10.471	26.1776	1227.72	353.692	759.012
10.4777	26.1943	1218.13	358.484	754.22
10.4844	26.211	1218.13	348.9	755.418
10.491	26.2276	1213.34	344.108	755.418
10.4977	26.2443	1251.68	342.91	759.012
10.5044	26.261	1260.06	344.108	755.418
10.5111	26.2776	1264.86	339.316	755.418
10.5177	26.2943	1261.26	344.108	755.418
10.5244	26.311	1255.27	347.702	749.428
10.5311	26.3276	1246.88	344.108	745.834
10.5377	26.3443	1264.86	348.9	754.22
10.5444	26.361	1264.86	339.316	755.418
10.5511	26.3776	1280.43	347.702	745.834
10.5577	26.3943	1275.64	344.108	744.635
10.5644	26.411	1275.64	362.078	730.259
10.5711	26.4276	1285.22	352.494	741.041
10.5777	26.4443	1285.22	342.91	744.635
10.5844	26.461	1279.23	357.286	730.259
10.5911	26.4776	1269.65	358.484	730.259
10.5977	26.4943	1270.85	347.702	745.834
10.6044	26.511	1285.22	348.9	749.428
10.6111	26.5277	1288.82	344.108	750.626
10.6177	26.5443	1255.27	347.702	745.834
10.6244	26.561	1245.69	344.108	749.428
10.6311	26.5777	1236.1	338.118	744.635
10.6377	26.5943	1260.06	342.91	749.428
10.6444	26.611	1269.65	348.9	730.259
10.6511	26.6277	1293.61	352.494	749.428
10.6577	26.6443	1322.36	342.91	735.051
10.6644	26.661	1365.49	344.108	730.259
10.6711	26.6777	1385.86	348.9	731.457
10.6777	26.6943	1405.03	348.9	731.457
10.6844	26.711	1403.83	352.494	736.249
10.6911	26.7277	1433.78	352.494	730.259
10.6977	26.7443	1446.96	362.078	754.22
10.7044	26.761	1446.96	358.484	744.635
10.7111	26.7777	1428.99	353.692	739.843
10.7177	26.7943	1423	366.871	736.249
10.7244	26.811	1379.87	348.9	735.051
10.7311	26.8277	1333.14	352.494	754.22
10.7377	26.8444	1307.99	357.286	750.626
10.7444	26.861	1285.22	352.494	763.804
10.7511	26.8777	1288.82	347.702	755.418
10.7577	26.8944	1307.99	342.91	755.418
10.7644	26.911	1309.18	344.108	749.428
10.7711	26.9277	1336.74	347.702	750.626
10.7777	26.9444	1365.49	339.316	739.843
10.7844	26.961	1394.25	342.91	741.041
10.7911	26.9777	1399.04	347.702	735.051
10.7977	26.9944	1423	342.91	736.249
10.8044	27.011	1466.13	342.91	735.051
10.8111	27.0277	1481.7	339.316	741.041
10.8177	27.0444	1476.91	347.702	739.843
10.8244	27.061	1476.91	338.118	750.626
10.8311	27.0777	1467.33	344.108	744.635
10.8378	27.0944	1432.58	342.91	754.22
10.8444	27.111	1409.82	342.91	731.457
10.8511	27.1277	1418.21	348.9	755.418
10.8578	27.1444	1428.99	344.108	759.012
10.8644	27.1611	1456.54	348.9	750.626
10.8711	27.1777	1428.99	342.91	741.041
10.8778	27.1944	1375.08	347.702	736.249
10.8844	27.2111	1351.12	352.494	744.635
10.8911	27.2277	1384.66	347.702	736.249
10.8978	27.2444	1376.27	342.91	749.428
10.9044	27.2611	1371.48	344.108	754.22
10.9111	27.2777	1385.86	348.9	760.21
10.9178	27.2944	1399.04	347.702	754.22
10.9244	27.3111	1370.28	348.9	760.21
10.9311	27.3277	1365.49	348.9	750.626
10.9378	27.3444	1370.28	347.702	760.21
10.9444	27.3611	1370.28	347.702	760.21
10.9511	27.3777	1376.27	344.108	759.012
10.9578	27.3944	1385.86	344.108	744.635
10.9644	27.4111	1400.24	353.692	750.626
10.9711	27.4277	1423	344.108	755.418
10.9778	27.4444	1446.96	352.494	741.041
10.9844	27.4611	1481.7	333.326	749.428
10.9911	27.4777	1542.8	339.316	755.418
10.9978	27.4944	1561.97	339.316	755.418
11.0044	27.5111	1563.17	339.316	750.626
11.0111	27.5278	1576.35	342.91	755.418
11.0178	27.5444	1600.31	333.326	759.012
11.0244	27.5611	1635.05	352.494	763.804
11.0311	27.5778	1638.65	357.286	755.418
11.0378	27.5944	1667.4	334.524	741.041
11.0444	27.6111	1697.35	334.524	741.041
11.0511	27.6278	1692.56	344.108	744.635
11.0578	27.6444	1676.99	348.9	741.041
11.0644	27.6611	1692.56	348.9	745.834
11.0711	27.6778	1705.74	348.9	736.249
11.0778	27.6944	1720.12	348.9	739.843
11.0844	27.7111	1720.12	344.108	744.635
11.0911	27.7278	1681.78	344.108	741.041
11.0978	27.7444	1668.6	347.702	744.635
11.1044	27.7611	1668.6	342.91	744.635
11.1111	27.7778	1668.6	348.9	745.834
11.1178	27.7944	1667.4	347.702	745.834
11.1244	27.8111	1620.68	358.484	749.428
11.1311	27.8278	1600.31	363.277	744.635
11.1378	27.8445	1591.92	362.078	744.635
11.1444	27.8611	1587.13	357.286	750.626
11.1511	27.8778	1625.47	342.91	745.834
11.1578	27.8945	1653.03	348.9	744.635
11.1645	27.9111	1662.61	358.484	760.21
11.1711	27.9278	1648.23	363.277	759.012
11.1778	27.9445	1619.48	363.277	773.389
11.1845	27.9611	1615.89	363.277	768.596
11.1911	27.9778	1577.55	358.484	749.428
11.1978	27.9945	1496.08	357.286	765.002
11.2045	28.0111	1428.99	357.286	750.626
11.2111	28.0278	1385.86	348.9	755.418
11.2178	28.0445	1365.49	363.277	768.596
11.2245	28.0611	1357.11	353.692	763.804
11.2311	28.0778	1322.36	342.91	759.012
11.2378	28.0945	1279.23	344.108	755.418
11.2445	28.1111	1194.17	348.9	745.834
11.2511	28.1278	1111.5	347.702	741.041
11.2578	28.1445	1063.58	362.078	749.428
11.2645	28.1612	1026.44	362.078	744.635
11.2711	28.1778	1007.27	358.484	749.428
11.2778	28.1945	978.521	363.277	744.635
11.2845	28.2112	1030.04	339.316	745.834
11.2911	28.2278	1039.62	347.702	750.626
11.2978	28.2445	1030.04	344.108	749.428
11.3045	28.2612	1021.65	363.277	754.22
11.3111	28.2778	1001.28	362.078	755.418
11.3178	28.2945	997.69	366.871	754.22
11.3245	28.3112	953.362	363.277	750.626
11.3311	28.3278	897.053	362.078	755.418
11.3378	28.3445	852.725	371.663	750.626
11.3445	28.3612	810.793	366.871	755.418
11.3511	28.3778	801.209	357.286	755.418
11.3578	28.3945	776.05	368.069	755.418
11.3645	28.4112	758.079	372.861	754.22
11.3711	28.4278	732.92	352.494	750.626
11.3778	28.4445	718.543	347.702	750.626
11.3845	28.4612	718.543	353.692	749.428
11.3911	28.4778	700.572	353.692	745.834
11.3978	28.4945	686.195	376.455	749.428
11.4045	28.5112	710.157	376.455	749.428
11.4111	28.5279	723.335	371.663	755.418
11.4178	28.5445	713.751	368.069	765.002
11.4245	28.5612	684.997	363.277	763.804
11.4311	28.5779	670.621	358.484	765.002
11.4378	28.5945	643.066	358.484	749.428
11.4445	28.6112	647.858	363.277	755.418
11.4511	28.6279	661.036	348.9	759.012
11.4578	28.6445	680.205	348.9	750.626
11.4645	28.6612	705.364	348.9	754.22
11.4711	28.6779	724.533	344.108	769.794
11.4778	28.6945	742.504	348.9	755.418
11.4845	28.7112	747.296	348.9	755.418
11.4911	28.7279	752.088	352.494	755.418
11.4978	28.7445	752.088	352.494	754.22
11.5045	28.7612	756.881	368.069	755.418
11.5112	28.7779	761.673	366.871	750.626
11.5178	28.7945	772.455	363.277	754.22
11.5245	28.8112	843.141	368.069	750.626
11.5312	28.8279	929.4	358.484	755.418
11.5378	28.8446	958.154	342.91	755.418
11.5445	28.8612	972.53	348.9	755.418
11.5512	28.8779	982.115	348.9	755.418
11.5578	28.8946	996.491	352.494	755.418
11.5645	28.9112	986.907	348.9	736.249
11.5712	28.9279	991.699	371.663	750.626
11.5778	28.9446	988.105	368.069	754.22
11.5845	28.9612	1002.48	368.069	754.22
11.5912	28.9779	1016.86	358.484	755.418
11.5978	28.9946	997.69	348.9	749.428
11.6045	29.0112	972.53	348.9	750.626
11.6112	29.0279	935.391	348.9	750.626
11.6178	29.0446	915.024	353.692	755.418
11.6245	29.0612	901.845	353.692	745.834
11.6312	29.0779	882.676	357.286	750.626
11.6378	29.0946	886.27	366.871	759.012
11.6445	29.1112	921.014	358.484	765.002
11.6512	29.1279	929.4	371.663	763.804
11.6578	29.1446	925.806	352.494	765.002
11.6645	29.1613	915.024	357.286	765.002
11.6712	29.1779	900.647	352.494	755.418
11.6778	29.1946	900.647	353.692	768.596
11.6845	29.2113	901.845	353.692	754.22
11.6912	29.2279	886.27	358.484	759.012
11.6978	29.2446	887.469	352.494	755.418
11.7045	29.2613	886.27	353.692	754.22
11.7112	29.2779	886.27	357.286	759.012
11.7178	29.2946	886.27	357.286	768.596
11.7245	29.3113	871.894	357.286	760.21
11.7312	29.3279	857.517	357.286	774.587
11.7378	29.3446	853.923	352.494	773.389
11.7445	29.3613	844.339	357.286	769.794
11.7512	29.3779	819.179	362.078	760.21
11.7578	29.3946	823.972	371.663	774.587
11.7645	29.4113	868.3	368.069	769.794
11.7712	29.4279	905.439	368.069	768.596
11.7778	29.4446	916.222	376.455	759.012
11.7845	29.4613	929.4	368.069	755.418
11.7912	29.4779	938.985	353.692	765.002
11.7978	29.4946	968.936	352.494	768.596
11.8045	29.5113	978.521	348.9	768.596
11.8112	29.528	983.313	347.702	769.794
11.8178	29.5446	1001.28	358.484	782.973
11.8245	29.5613	988.105	347.702	779.379
11.8312	29.578	967.738	352.494	765.002
11.8379	29.5946	938.985	358.484	763.804
11.8445	29.6113	925.806	371.663	773.389
11.8512	29.628	938.985	371.663	778.181
11.8579	29.6446	972.53	363.277	782.973
11.8645	29.6613	1012.07	366.871	784.171
11.8712	29.678	1074.36	363.277	784.171
11.8779	29.6946	1116.3	358.484	784.171
11.8845	29.7113	1155.83	357.286	765.002
11.8912	29.728	1149.84	353.692	769.794
11.8979	29.7446	1136.66	362.078	769.794
11.9045	29.7613	1106.71	377.653	774.587
11.9112	29.778	1111.5	377.653	769.794
11.9179	29.7946	1131.87	353.692	778.181
11.9245	29.8113	1141.46	357.286	774.587
11.9312	29.828	1107.91	371.663	773.389
11.9379	29.8447	1101.92	363.277	784.171
11.9445	29.8613	1111.5	358.484	782.973
11.9512	29.878	1192.97	372.861	782.973
11.9579	29.8947	1250.48	372.861	784.171
11.9645	29.9113	1312.78	372.861	769.794
11.9712	29.928	1357.11	368.069	773.389
11.9779	29.9447	1376.27	377.653	778.181
11.9845	29.9613	1394.25	372.861	782.973
11.9912	29.978	1389.45	371.663	784.171
11.9979	29.9947	1424.2	352.494	765.002
12.0045	30.0113	1476.91	352.494	768.596
12.0112	30.028	1476.91	353.692	763.804
12.0179	30.0447	1451.75	358.484	779.379
12.0245	30.0613	1405.03	366.871	773.389
12.0312	30.078	1394.25	368.069	769.794
12.0379	30.0947	1394.25	377.653	768.596
12.0445	30.1113	1375.08	357.286	773.389
12.0512	30.128	1355.91	353.692	763.804
12.0579	30.1447	1327.15	357.286	763.804
12.0645	30.1614	1336.74	366.871	763.804
12.0712	30.178	1408.62	357.286	768.596
12.0779	30.1947	1542.8	352.494	763.804
12.0845	30.2114	1667.4	358.484	765.002
12.0912	30.228	1764.44	363.277	784.171
12.0979	30.2447	1884.25	358.484	782.973
12.1045	30.2614	1932.17	366.871	784.171
12.1112	30.278	1978.9	376.455	768.596
12.1179	30.2947	2022.03	353.692	768.596
12.1245	30.3114	2042.39	347.702	774.587
12.1312	30.328	2041.19	357.286	768.596
12.1379	30.3447	2007.65	371.663	774.587
12.1445	30.3614	1873.47	371.663	784.171
12.1512	30.378	1768.04	376.455	773.389
12.1579	30.3947	1668.6	366.871	782.973
12.1646	30.4114	1619.48	358.484	784.171
12.1712	30.428	1609.9	362.078	778.181
12.1779	30.4447	1619.48	357.286	769.794
12.1846	30.4614	1629.06	348.9	784.171
12.1912	30.478	1643.44	348.9	792.557
12.1979	30.4947	1635.05	363.277	782.973
12.2046	30.5114	1625.47	363.277	784.171
12.2112	30.5281	1624.27	363.277	773.389
12.2179	30.5447	1619.48	366.871	769.794
12.2246	30.5614	1619.48	366.871	774.587
12.2312	30.5781	1635.05	368.069	769.794
12.2379	30.5947	1678.18	368.069	773.389
12.2446	30.6114	1734.49	371.663	769.794
12.2512	30.6281	1792	368.069	774.587
12.2579	30.6447	1836.33	368.069	773.389
12.2646	30.6614	1811.17	372.861	773.389
12.2712	30.6781	1763.25	376.455	773.389
12.2779	30.6947	1720.12	358.484	769.794
12.2846	30.7114	1681.78	363.277	769.794
12.2912	30.7281	1724.91	358.484	768.596
12.2979	30.7447	1769.24	353.692	778.181
12.3046	30.7614	1769.24	353.692	763.804
12.3112	30.7781	1740.48	352.494	769.794
12.3179	30.7947	1734.49	352.494	773.389
12.3246	30.8114	1710.53	347.702	773.389
12.3312	30.8281	1702.15	344.108	765.002
12.3379	30.8448	1686.57	368.069	768.596
12.3446	30.8614	1691.36	362.078	768.596
12.3512	30.8781	1691.36	368.069	782.973
12.3579	30.8948	1687.77	371.663	784.171
12.3646	30.9114	1702.15	368.069	773.389
12.3712	30.9281	1721.31	353.692	773.389
12.3779	30.9448	1716.52	353.692	773.389
12.3846	30.9614	1705.74	357.286	774.587
12.3912	30.9781	1687.77	362.078	773.389
12.3979	30.9948	1649.43	363.277	774.587
12.4046	31.0114	1638.65	358.484	782.973
12.4112	31.0281	1653.03	358.484	787.765
12.4179	31.0448	1644.64	371.663	784.171
12.4246	31.0614	1653.03	358.484	774.587
12.4312	31.0781	1659.02	381.247	778.181
12.4379	31.0948	1629.06	357.286	779.379
12.4446	31.1114	1558.38	352.494	773.389
12.4512	31.1281	1424.2	357.286	779.379
12.4579	31.1448	1251.68	366.871	779.379
12.4646	31.1615	1055.2	368.069	774.587
12.4712	31.1781	910.232	372.861	765.002
12.4779	31.1948	819.179	368.069	784.171
12.4846	31.2115	791.624	353.692	784.171
12.4912	31.2281	771.257	358.484	782.973
12.4979	31.2448	782.04	357.286	778.181
12.5046	31.2615	777.248	353.692	778.181
12.5113	31.2781	743.702	366.871	768.596
12.5179	31.2948	729.325	363.277	782.973
12.5246	31.3115	723.335	368.069	769.794
12.5313	31.3281	719.741	368.069	779.379
12.5379	31.3448	718.543	363.277	768.596
12.5446	31.3615	724.533	358.484	782.973
12.5513	31.3781	728.127	371.663	774.587
12.5579	31.3948	732.92	368.069	779.379
12.5646	31.4115	743.702	362.078	784.171
12.5713	31.4281	752.088	357.286	763.804
12.5779	31.4448	756.881	358.484	763.804
12.5846	31.4615	747.296	352.494	768.596
12.5913	31.4781	752.088	362.078	759.012
12.5979	31.4948	747.296	362.078	763.804
12.6046	31.5115	734.118	358.484	768.596
12.6113	31.5282	729.325	353.692	778.181
12.6179	31.5448	710.157	358.484	773.389
12.6246	31.5615	681.403	357.286	774.587
12.6313	31.5782	662.234	352.494	769.794
12.6379	31.5948	638.273	352.494	787.765
12.6446	31.6115	633.481	352.494	782.973
12.6513	31.6282	617.906	353.692	778.181
12.6579	31.6448	609.52	353.692	769.794
12.6646	31.6615	603.53	363.277	778.181
12.6713	31.6782	598.738	353.692	774.587
12.6779	31.6948	603.53	362.078	778.181
12.6846	31.7115	604.728	362.078	779.379
12.6913	31.7282	595.143	362.078	784.171
12.6979	31.7448	599.936	366.871	784.171
12.7046	31.7615	604.728	366.871	784.171
12.7113	31.7782	613.114	358.484	788.963
12.7179	31.7948	614.312	357.286	802.142
12.7246	31.8115	622.699	368.069	798.548
12.7313	31.8282	628.689	376.455	788.963
12.7379	31.8449	633.481	372.861	787.765
12.7446	31.8615	641.867	372.861	802.142
12.7513	31.8782	657.442	352.494	806.934
12.7579	31.8949	667.027	358.484	798.548
12.7646	31.9115	676.611	353.692	787.765
12.7713	31.9282	667.027	368.069	793.755
12.7779	31.9449	665.829	372.861	793.755
12.7846	31.9615	671.819	353.692	797.35
12.7913	31.9782	657.442	363.277	798.548
12.7979	31.9949	637.075	352.494	792.557
12.8046	32.0115	623.897	371.663	792.557
12.8113	32.0282	623.897	353.692	793.755
12.8179	32.0449	646.66	357.286	793.755
12.8246	32.0615	676.611	366.871	802.142
12.8313	32.0782	704.166	363.277	812.924
12.838	32.0949	704.166	348.9	802.142
12.8446	32.1115	686.195	348.9	787.765
12.8513	32.1282	705.364	357.286	797.35
12.858	32.1449	704.166	357.286	798.548
12.8646	32.1616	690.988	357.286	812.924
12.8713	32.1782	681.403	366.871	812.924
12.878	32.1949	689.79	371.663	812.924
12.8846	32.2116	700.572	363.277	821.31
12.8913	32.2282	694.582	363.277	808.132
12.898	32.2449	718.543	371.663	797.35
12.9046	32.2616	714.949	362.078	787.765
12.9113	32.2782	699.374	377.653	784.171
12.918	32.2949	671.819	372.861	787.765
12.9246	32.3116	652.65	362.078	788.963
12.9313	32.3282	641.867	353.692	784.171
12.938	32.3449	643.066	358.484	784.171
12.9446	32.3616	657.442	376.455	787.765
12.9513	32.3782	657.442	372.861	784.171
12.958	32.3949	665.829	371.663	784.171
12.9646	32.4116	665.829	376.455	793.755
12.9713	32.4282	661.036	377.653	797.35
12.978	32.4449	656.244	358.484	793.755
12.9846	32.4616	646.66	358.484	797.35
12.9913	32.4782	632.283	362.078	793.755
12.998	32.4949	632.283	362.078	773.389
13.0046	32.5116	633.481	358.484	779.379
13.0113	32.5283	633.481	358.484	782.973
13.018	32.5449	661.036	353.692	778.181
13.0246	32.5616	676.611	358.484	782.973
13.0313	32.5783	686.195	357.286	802.142
13.038	32.5949	676.611	362.078	787.765
13.0446	32.6116	661.036	357.286	792.557
13.0513	32.6283	680.205	352.494	797.35
13.058	32.6449	708.958	353.692	793.755
13.0646	32.6616	723.335	353.692	793.755
13.0713	32.6783	790.426	357.286	792.557
13.078	32.6949	849.131	353.692	798.548
13.0846	32.7116	886.27	358.484	797.35
13.0913	32.7283	915.024	357.286	798.548
13.098	32.7449	940.183	362.078	788.963
13.1046	32.7616	954.56	358.484	792.557
13.1113	32.7783	953.362	362.078	811.726
13.118	32.7949	954.56	357.286	806.934
13.1246	32.8116	978.521	366.871	803.34
13.1313	32.8283	997.69	366.871	798.548
13.138	32.845	1007.27	368.069	793.755
13.1446	32.8616	1016.86	366.871	811.726
13.1513	32.8783	1026.44	363.277	806.934
13.158	32.895	1020.45	371.663	792.557
13.1647	32.9116	982.115	366.871	784.171
13.1713	32.9283	962.946	363.277	787.765
13.178	32.945	962.946	371.663	787.765
13.1847	32.9616	972.53	372.861	784.171
13.1913	32.9783	978.521	368.069	784.171
13.198	32.995	962.946	381.247	792.557
13.2047	33.0116	940.183	377.653	788.963
13.2113	33.0283	915.024	376.455	793.755
13.218	33.045	906.637	381.247	792.557
13.2247	33.0616	895.855	376.455	793.755
13.2313	33.0783	881.478	376.455	798.548
13.238	33.095	876.686	377.653	798.548
13.2447	33.1116	871.894	372.861	808.132
13.2513	33.1283	868.3	377.653	816.518
13.258	33.145	863.507	372.861	817.716
13.2647	33.1617	863.507	377.653	802.142
13.2713	33.1783	858.715	377.653	816.518
13.278	33.195	857.517	371.663	812.924
13.2847	33.2117	863.507	358.484	812.924
13.2913	33.2283	868.3	376.455	812.924
13.298	33.245	876.686	372.861	812.924
13.3047	33.2617	892.261	362.078	797.35
13.3113	33.2783	897.053	366.871	798.548
13.318	33.295	887.469	357.286	803.34
13.3247	33.3117	873.092	358.484	797.35
[truncated: 15,999 more rows]

## Sheet: SV-AUC
c(S)	Dynein Subcomplex	p150 Subcomplex	NudE Subcomplex
0	0.00308	0.00342	0.00448
0.152	1.49e-11	0.000605	9.27e-15
0.303	3.16e-14	4.09e-08	3.36e-14
0.455	2.88e-14	2.81e-16	2.52e-14
0.606	2.33e-14	2.56e-14	3.36e-14
0.758	8.11e-15	2.22e-14	8.56e-15
0.909	5.54e-14	1.71e-14	8.88e-15
1.06	8.3e-15	4.64e-14	6.09e-14
1.21	4.19e-14	7.51e-15	3.54e-14
1.36	8.64e-15	5.3e-14	9.11e-15
1.52	7.16e-15	6.52e-14	5.1e-14
1.67	1.79e-14	1.06e-14	7.78e-15
1.82	7.29e-15	5.62e-14	7.68e-15
1.97	8.81e-15	1.74e-12	9.56e-15
2.12	1.48e-14	3.08e-10	5.84e-18
2.27	5.05e-14	4.26e-08	7.74e-09
2.42	7.13e-13	3.54e-06	0.00322
2.58	6.48e-08	0.000133	0.523
2.73	0.000229	0.00209	0.585
2.88	0.032	0.0131	0.0898
3.03	0.277	0.0375	0.018
3.18	0.305	0.0563	0.0116
3.33	0.0977	0.0559	0.0241
3.48	0.0191	0.0431	0.077
3.64	0.00402	0.0307	0.157
3.79	0.00131	0.0219	0.11
3.94	0.000797	0.0167	0.0252
4.09	0.000916	0.0138	0.0028
4.24	0.00183	0.0124	0.000312
4.39	0.0055	0.0119	7.74e-05
4.55	0.02	0.0119	7.12e-05
4.7	0.0742	0.0123	0.000274
4.85	0.233	0.013	0.00321
5	0.533	0.014	0.0551
5.15	0.801	0.0157	0.602
5.3	0.758	0.0184	2.01
5.45	0.459	0.0233	1.28
5.61	0.193	0.0322	0.15
5.76	0.0638	0.0488	0.00465
5.91	0.0191	0.0802	7.22e-05
6.06	0.00609	0.139	1.15e-06
6.21	0.00231	0.242	3.66e-08
6.36	0.00113	0.402	3.64e-09
6.52	0.000757	0.596	1.4e-09
6.67	0.000687	0.744	2.04e-09
6.82	0.000815	0.744	8.93e-09
6.97	0.00119	0.577	8.42e-08
7.12	0.00196	0.343	1.15e-06
7.27	0.00341	0.159	1.61e-05
7.42	0.00576	0.0586	0.000174
7.58	0.00903	0.0181	0.0012
7.73	0.0123	0.00494	0.00494
7.88	0.0146	0.00126	0.012
8.03	0.0151	0.000317	0.0185
8.18	0.0137	8.3e-05	0.02
8.33	0.0113	2.34e-05	0.0172
8.48	0.00877	7.28e-06	0.0129
8.64	0.00655	2.58e-06	0.00931
8.79	0.00494	1.05e-06	0.00677
8.94	0.0038	4.93e-07	0.00516
9.09	0.00308	2.68e-07	0.00413
9.24	0.00265	1.68e-07	0.00351
9.39	0.00243	1.21e-07	0.00314
9.55	0.00237	9.99e-08	0.00297
9.7	0.00243	9.28e-08	0.00293
9.85	0.00261	9.65e-08	0.00305
10	0.00288	1.1e-07	0.00335
10.2	0.00323	1.37e-07	0.00387
10.3	0.00363	1.82e-07	0.00464
10.5	0.00402	2.53e-07	0.00567
10.6	0.00433	3.64e-07	0.00687
10.8	0.00454	5.33e-07	0.00792
10.9	0.00452	7.87e-07	0.00846
11.1	0.00429	1.16e-06	0.00796
11.2	0.00386	1.69e-06	0.00646
11.4	0.00328	2.43e-06	0.00436
11.5	0.00266	3.44e-06	0.0024
11.7	0.00202	4.79e-06	0.00108
11.8	0.00147	6.57e-06	0.000392
12	0.00103	8.89e-06	0.000116
12.1	0.000685	1.19e-05	2.85e-05
12.3	0.000443	1.58e-05	5.85e-06
12.4	0.00028	2.09e-05	1.07e-06
12.6	0.000175	2.76e-05	1.78e-07
12.7	0.00011	3.64e-05	2.91e-08
12.9	7.03e-05	4.84e-05	4.82e-09
13	4.63e-05	6.49e-05	9.07e-10
13.2	3.25e-05	8.8e-05	2.03e-10
13.3	2.46e-05	0.000121	6.03e-11
13.5	2.06e-05	0.00017	2.51e-11
13.6	1.94e-05	0.000243	1.61e-11
13.8	2.12e-05	0.000357	1.69e-11
13.9	2.76e-05	0.000537	3.04e-11
14.1	4.35e-05	0.000829	1.01e-10
14.2	8.42e-05	0.00132	6.3e-10
14.4	0.000207	0.00217	7.77e-09
14.5	0.000649	0.00365	1.87e-07
14.7	0.00264	0.00636	9.03e-06
14.8	0.014	0.0113	0.000869
15	0.194	0.0414	0.326
