# Supplementary material for: Multivalency, autoinhibition, and protein disorder in the regulation of interactions of dynein intermediate chain with dynactin and the nuclear distribution protein
Source: eLife journal article supplement (doi:10.7554/elife.80217), 2022-11-23
Supplement: fig9-data1 [file Figure 9-source data 1.xlsx]

## Sheet: SEC-MALS
IC FL
time (min)	Molar Mass 1	MW	time (min)	LS	time (min)	UV	time (min)	RI
16.9701	82480.8	82.4808	13.9408	0.271451	13.9455	0.0583749	13.9408	0.087734
16.9787	83753.7	83.7537	13.9494	0.270072	13.9541	0.0583887	13.9496	0.0878181
16.9872	83727.5	83.7275	13.9579	0.268794	13.9626	0.0583948	13.9584	0.0879295
16.9957	83730.7	83.7307	13.9664	0.267549	13.9711	0.0583815	13.9671	0.0881389
17.0043	83704.8	83.7048	13.975	0.266308	13.9797	0.058348	13.9759	0.0882174
17.0128	83657.8	83.6578	13.9835	0.265009	13.9882	0.0583047	13.9847	0.088225
17.0213	83525.7	83.5257	13.992	0.263681	13.9967	0.0582718	13.9935	0.0882326
17.0299	83366.5	83.3665	14.0006	0.26234	14.0053	0.0582757	14.0022	0.0882906
17.0384	83251.3	83.2513	14.0091	0.261193	14.0138	0.0583449	14.011	0.0885677
17.0469	83202.3	83.2023	14.0176	0.260155	14.0223	0.0585063	14.0198	0.0887358
17.0555	83117.7	83.1177	14.0262	0.259139	14.0309	0.0587813	14.0285	0.088892
17.064	82960.7	82.9607	14.0347	0.258045	14.0394	0.0591832	14.0373	0.0890214
17.0725	82886	82.886	14.0432	0.256912	14.0479	0.0597165	14.0461	0.0891938
17.0811	82839.9	82.8399	14.0518	0.255848	14.0565	0.0603765	14.0549	0.0894467
17.0896	82739.7	82.7397	14.0603	0.254879	14.065	0.0611511	14.0636	0.0896846
17.0981	82686.1	82.6861	14.0688	0.253815	14.0735	0.0620228	14.0724	0.0898994
17.1067	82647.6	82.6476	14.0774	0.252594	14.0821	0.0629705	14.0812	0.0900906
17.1152	82480.8	82.4808	14.0859	0.251406	14.0906	0.0639719	14.0899	0.0902358
17.1237	82275.2	82.2752	14.0944	0.250324	14.0991	0.0650056	14.0987	0.0904272
17.1323	82083.7	82.0837	14.103	0.249331	14.1077	0.0660517	14.1075	0.0906777
17.1408	81952.9	81.9529	14.1115	0.248353	14.1162	0.0670936	14.1163	0.090914
17.1493	81816.8	81.8168	14.12	0.247398	14.1247	0.0681175	14.125	0.0911747
17.1579	81625	81.625	14.1286	0.246515	14.1333	0.069113	14.1338	0.0914617
17.1664	81406.3	81.4063	14.1371	0.245765	14.1418	0.070073	14.1426	0.0917409
17.1749	81206.1	81.2061	14.1456	0.2451	14.1503	0.0709925	14.1514	0.092044
17.1835	81086	81.086	14.1542	0.244487	14.1589	0.0718689	14.1601	0.0923784
17.192	81000.6	81.0006	14.1627	0.243915	14.1674	0.0727013	14.1689	0.0927144
17.2005	80942.8	80.9428	14.1712	0.243264	14.1759	0.0734898	14.1777	0.0930125
17.2091	80854.1	80.8541	14.1798	0.242497	14.1845	0.0742356	14.1864	0.0932725
17.2176	80701.6	80.7016	14.1883	0.241736	14.193	0.0749401	14.1952	0.0935195
17.2261	80519.9	80.5199	14.1968	0.241203	14.2015	0.0756053	14.204	0.0938071
17.2347	80336.1	80.3361	14.2054	0.240813	14.2101	0.0762333	14.2128	0.0941469
17.2432	80188.1	80.1881	14.2139	0.240446	14.2186	0.0768257	14.2215	0.094503
17.2517	80062	80.062	14.2224	0.24008	14.2271	0.0773843	14.2303	0.0948481
17.2603	79895.4	79.8954	14.231	0.239652	14.2357	0.0779111	14.2391	0.0951831
17.2688	79688.1	79.6881	14.2395	0.239175	14.2442	0.0784078	14.2478	0.0955565
17.2773	79506.8	79.5068	14.248	0.23867	14.2527	0.078876	14.2566	0.095977
17.2859	79356.9	79.3569	14.2566	0.238155	14.2613	0.0793174	14.2654	0.0963843
17.2944	79227.9	79.2279	14.2651	0.237675	14.2698	0.0797334	14.2742	0.0967556
17.3029	79130.3	79.1303	14.2736	0.237325	14.2783	0.0801255	14.2829	0.0971042
17.3115	79007.5	79.0075	14.2822	0.237056	14.2869	0.080495	14.2917	0.0974268
17.32	78827.3	78.8273	14.2907	0.236824	14.2954	0.0808433	14.3005	0.0977391
17.3285	78644	78.644	14.2992	0.236696	14.3039	0.0811714	14.3092	0.0981153
17.3371	78488.8	78.4888	14.3078	0.236552	14.3125	0.0814804	14.318	0.0985338
17.3456	78344.9	78.3449	14.3163	0.236326	14.321	0.0817715	14.3268	0.0989684
17.3541	78178.3	78.1783	14.3248	0.23594	14.3295	0.0820455	14.3356	0.0993708
17.3627	77985.3	77.9853	14.3334	0.235521	14.3381	0.0823036	14.3443	0.0997455
17.3712	77793.5	77.7935	14.3419	0.235238	14.3466	0.0825466	14.3531	0.10019
17.3797	77632.1	77.6321	14.3504	0.235062	14.3551	0.0827754	14.3619	0.100648
17.3883	77503.2	77.5032	14.359	0.234954	14.3637	0.0829911	14.3707	0.101071
17.3968	77405	77.405	14.3675	0.234859	14.3722	0.0831945	14.3794	0.101475
17.4053	77318	77.318	14.376	0.234754	14.3807	0.0833865	14.3882	0.101832
17.4139	77203.7	77.2037	14.3846	0.234571	14.3893	0.0835678	14.397	0.102171
17.4224	77067.7	77.0677	14.3931	0.23433	14.3978	0.083739	14.4057	0.102536
17.4309	76924.4	76.9244	14.4016	0.234059	14.4063	0.0839009	14.4145	0.102933
17.4395	76784.8	76.7848	14.4102	0.233843	14.4149	0.0840538	14.4233	0.103391
17.448	76651.8	76.6518	14.4187	0.23367	14.4234	0.0841982	14.4321	0.103801
17.4565	76512.2	76.5122	14.4272	0.233472	14.4319	0.0843344	14.4408	0.104162
17.4651	76349	76.349	14.4358	0.233234	14.4405	0.0844628	14.4496	0.104588
17.4736	76193	76.193	14.4443	0.232927	14.449	0.0845836	14.4584	0.105047
17.4821	76062.7	76.0627	14.4528	0.232481	14.4575	0.0846972	14.4671	0.105462
17.4907	75948.4	75.9484	14.4614	0.232101	14.4661	0.0848037	14.4759	0.105803
17.4992	75830.8	75.8308	14.4699	0.231851	14.4746	0.0849035	14.4847	0.106146
17.5077	75718.8	75.7188	14.4784	0.231673	14.4831	0.0849969	14.4935	0.106433
17.5163	75594.8	75.5948	14.487	0.231547	14.4917	0.0850842	14.5022	0.106701
17.5248	75466.3	75.4663	14.4955	0.231438	14.5002	0.0851657	14.511	0.107059
17.5333	75352.6	75.3526	14.504	0.231329	14.5087	0.0852418	14.5198	0.107435
17.5419	75245.5	75.2455	14.5125	0.231202	14.5173	0.0853129	14.5285	0.107794
17.5504	75127.1	75.1271	14.5211	0.231095	14.5258	0.0853793	14.5373	0.108073
17.5589	75016.4	75.0164	14.5296	0.230974	14.5343	0.0854414	14.5461	0.108334
17.5675	74906	74.906	14.5381	0.230819	14.5429	0.0854994	14.5549	0.108672
17.576	74805.6	74.8056	14.5467	0.230587	14.5514	0.0855539	14.5636	0.10904
17.5845	74705.4	74.7054	14.5552	0.230248	14.5599	0.085605	14.5724	0.109347
17.5931	74574.5	74.5745	14.5637	0.229906	14.5685	0.0856531	14.5812	0.109584
17.6016	74442.8	74.4428	14.5723	0.229652	14.577	0.0856986	14.59	0.109779
17.6101	74340.8	74.3408	14.5808	0.229431	14.5855	0.0857415	14.5987	0.109948
17.6187	74235.9	74.2359	14.5893	0.229212	14.5941	0.0857822	14.6075	0.110171
17.6272	74126	74.126	14.5979	0.228929	14.6026	0.0858207	14.6163	0.110407
17.6357	73999.4	73.9994	14.6064	0.228457	14.6111	0.0858572	14.625	0.110615
17.6443	73887.4	73.8874	14.6149	0.227874	14.6197	0.0858916	14.6338	0.11083
17.6528	73769.4	73.7694	14.6235	0.227308	14.6282	0.0859239	14.6426	0.111014
17.6613	73659.9	73.6599	14.632	0.226787	14.6367	0.0859541	14.6514	0.111205
17.6699	73565.9	73.5659	14.6405	0.226303	14.6453	0.085982	14.6601	0.111434
17.6784	73479.6	73.4796	14.6491	0.225872	14.6538	0.0860075	14.6689	0.111611
17.6869	73365.7	73.3657	14.6576	0.225497	14.6623	0.0860307	14.6777	0.111719
17.6955	73214.4	73.2144	14.6661	0.225164	14.6709	0.0860514	14.6864	0.111807
17.704	73036.8	73.0368	14.6747	0.22479	14.6794	0.0860698	14.6952	0.111883
17.7125	72911.4	72.9114	14.6832	0.224344	14.6879	0.086086	14.704	0.111972
17.7211	72839.4	72.8394	14.6917	0.223672	14.6965	0.0861002	14.7128	0.112073
17.7296	72759.7	72.7597	14.7003	0.222862	14.705	0.0861128	14.7215	0.112187
17.7381	72675.7	72.6757	14.7088	0.222126	14.7135	0.086124	14.7303	0.11228
17.7467	72571.9	72.5719	14.7173	0.221449	14.7221	0.0861341	14.7391	0.112321
17.7552	72465.6	72.4656	14.7259	0.220796	14.7306	0.0861435	14.7478	0.112367
17.7637	72357.8	72.3578	14.7344	0.22008	14.7391	0.0861524	14.7566	0.112446
17.7723	72281.6	72.2816	14.7429	0.219337	14.7477	0.0861612	14.7654	0.112522
17.7808	72229.4	72.2294	14.7515	0.218591	14.7562	0.0861699	14.7742	0.112517
17.7893	72160.8	72.1608	14.76	0.217838	14.7647	0.0861789	14.7829	0.112512
17.7979	72008.6	72.0086	14.7685	0.217127	14.7733	0.0861881	14.7917	0.112492
17.8064	71823.5	71.8235	14.7771	0.216403	14.7818	0.0861978	14.8005	0.112437
17.8149	71684.9	71.6849	14.7856	0.215633	14.7903	0.0862076	14.8093	0.112409
17.8235	71584.8	71.5848	14.7941	0.214905	14.7989	0.0862177	14.818	0.112404
17.832	71493.6	71.4936	14.8027	0.21424	14.8074	0.0862281	14.8268	0.112387
17.8405	71385.1	71.3851	14.8112	0.213626	14.8159	0.0862387	14.8356	0.11237
17.8491	71294.2	71.2942	14.8197	0.212932	14.8245	0.0862494	14.8443	0.112306
17.8576	71243.7	71.2437	14.8283	0.212217	14.833	0.08626	14.8531	0.112297
17.8661	71265.1	71.2651	14.8368	0.21155	14.8415	0.0862703	14.8619	0.112287
17.8747	71319.3	71.3193	14.8453	0.210932	14.8501	0.0862797	14.8707	0.112234
17.8832	71242.7	71.2427	14.8539	0.210231	14.8586	0.0862881	14.8794	0.112141
17.8917	71091.3	71.0913	14.8624	0.209549	14.8671	0.0862957	14.8882	0.112008
17.9003	70940	70.94	14.8709	0.208938	14.8757	0.0863026	14.897	0.111871
17.9088	70808.7	70.8087	14.8795	0.208381	14.8842	0.0863087	14.9057	0.111783
17.9173	70716.7	70.7167	14.888	0.207872	14.8927	0.0863138	14.9145	0.1117
17.9259	70618.9	70.6189	14.8965	0.207234	14.9013	0.0863178	14.9233	0.111608
17.9344	70556.8	70.5568	14.9051	0.206425	14.9098	0.0863211	14.9321	0.111506
17.9429	70521.1	70.5211	14.9136	0.205583	14.9183	0.0863237	14.9408	0.111384
17.9515	70432.4	70.4324	14.9221	0.204725	14.9269	0.0863258	14.9496	0.111267
17.96	70325.4	70.3254	14.9307	0.203695	14.9354	0.0863274	14.9584	0.111177
17.9685	70215.4	70.2154	14.9392	0.202663	14.9439	0.0863286	14.9671	0.111067
17.9771	70098.8	70.0988	14.9477	0.201715	14.9525	0.0863294	14.9759	0.110911
17.9856	69963.6	69.9636	14.9563	0.200836	14.961	0.0863298	14.9847	0.110758
17.9941	69835.2	69.8352	14.9648	0.200006	14.9695	0.0863299	14.9935	0.110607
18.0027	69658	69.658	14.9733	0.19924	14.9781	0.0863296	15.0022	0.110454
18.0112	69459	69.459	14.9819	0.198524	14.9866	0.0863289	15.011	0.110294
18.0197	69331.1	69.3311	14.9904	0.197842	14.9951	0.086328	15.0198	0.110153
18.0283	69267.8	69.2678	14.9989	0.197076	15.0037	0.0863268	15.0286	0.110032
18.0368	69198.3	69.1983	15.0075	0.196283	15.0122	0.0863253	15.0373	0.109866
18.0453	69064.1	69.0641	15.016	0.195498	15.0207	0.0863236	15.0461	0.109717
18.0539	68951.5	68.9515	15.0245	0.194764	15.0293	0.0863217	15.0549	0.109605
18.0624	68929.9	68.9299	15.0331	0.194144	15.0378	0.0863198	15.0636	0.109469
18.0709	68910.7	68.9107	15.0416	0.193617	15.0463	0.0863175	15.0724	0.109325
18.0795	68825.4	68.8254	15.0501	0.193026	15.0549	0.0863148	15.0812	0.109154
18.088	68692.7	68.6927	15.0587	0.192319	15.0634	0.0863123	15.09	0.108974
18.0965	68510.2	68.5102	15.0672	0.191599	15.0719	0.0863102	15.0987	0.108781
18.1051	68349.8	68.3498	15.0757	0.190824	15.0805	0.0863088	15.1075	0.108619
18.1136	68299.7	68.2997	15.0843	0.189957	15.089	0.0863082	15.1163	0.108494
18.1221	68201.2	68.2012	15.0928	0.188944	15.0975	0.0863089	15.125	0.108349
18.1307	68078.6	68.0786	15.1013	0.187945	15.1061	0.0863105	15.1338	0.108193
18.1392	67965.6	67.9656	15.1099	0.187082	15.1146	0.0863129	15.1426	0.108028
18.1477	67196.9	67.1969	15.1184	0.186309	15.1231	0.0863161	15.1514	0.10789
			15.1269	0.185595	15.1317	0.0863202	15.1601	0.107789
			15.1355	0.184918	15.1402	0.086325	15.1689	0.107662
			15.144	0.184219	15.1487	0.0863301	15.1777	0.107524
			15.1525	0.183471	15.1573	0.0863351	15.1864	0.107347
			15.1611	0.182649	15.1658	0.0863404	15.1952	0.107127
			15.1696	0.181877	15.1743	0.0863455	15.204	0.106974
			15.1781	0.18117	15.1829	0.0863504	15.2128	0.106862
			15.1867	0.180503	15.1914	0.0863546	15.2215	0.106713
			15.1952	0.179834	15.1999	0.086358	15.2303	0.106567
			15.2037	0.179187	15.2085	0.0863605	15.2391	0.106423
			15.2123	0.178578	15.217	0.0863621	15.2479	0.106283
			15.2208	0.17791	15.2255	0.0863629	15.2566	0.106187
			15.2293	0.177121	15.2341	0.0863627	15.2654	0.106051
			15.2379	0.176246	15.2426	0.0863618	15.2742	0.105904
			15.2464	0.175288	15.2511	0.0863603	15.2829	0.105767
			15.2549	0.174368	15.2597	0.0863582	15.2917	0.105593
			15.2635	0.173606	15.2682	0.0863556	15.3005	0.105435
			15.272	0.172943	15.2767	0.0863526	15.3093	0.105295
			15.2805	0.172336	15.2853	0.0863494	15.318	0.105154
			15.2891	0.171782	15.2938	0.0863459	15.3268	0.105047
			15.2976	0.171279	15.3023	0.0863421	15.3356	0.104924
			15.3061	0.170584	15.3109	0.0863381	15.3443	0.104792
			15.3147	0.169771	15.3194	0.086334	15.3531	0.104702
			15.3232	0.168955	15.3279	0.0863297	15.3619	0.104612
			15.3317	0.168115	15.3365	0.0863254	15.3707	0.1045
			15.3403	0.167304	15.345	0.0863212	15.3794	0.104404
			15.3488	0.166549	15.3535	0.0863173	15.3882	0.104278
			15.3573	0.165742	15.3621	0.0863137	15.397	0.104102
			15.3659	0.165016	15.3706	0.0863105	15.4057	0.104024
			15.3744	0.164382	15.3791	0.086308	15.4145	0.103972
			15.3829	0.163801	15.3877	0.0863061	15.4233	0.103887
			15.3915	0.163269	15.3962	0.0863048	15.4321	0.103803
			15.4	0.162781	15.4047	0.086304	15.4408	0.103719
			15.4085	0.162209	15.4133	0.0863037	15.4496	0.103654
			15.4171	0.161569	15.4218	0.0863036	15.4584	0.103608
			15.4256	0.161049	15.4303	0.0863038	15.4672	0.103561
			15.4341	0.160583	15.4389	0.086304	15.4759	0.103468
			15.4427	0.160108	15.4474	0.0863043	15.4847	0.103396
			15.4512	0.159577	15.4559	0.0863046	15.4935	0.10331
			15.4597	0.158974	15.4645	0.0863051	15.5022	0.103238
			15.4683	0.15842	15.473	0.0863059	15.511	0.103208
			15.4768	0.157938	15.4815	0.0863074	15.5198	0.103173
			15.4853	0.157472	15.4901	0.0863098	15.5286	0.103132
			15.4939	0.157006	15.4986	0.0863133	15.5373	0.103073
			15.5024	0.156504	15.5071	0.0863181	15.5461	0.103067
			15.5109	0.155982	15.5157	0.0863245	15.5549	0.103073
			15.5195	0.155473	15.5242	0.0863323	15.5636	0.103074
			15.528	0.154982	15.5327	0.0863416	15.5724	0.103071
			15.5365	0.154444	15.5413	0.0863521	15.5812	0.103069
			15.5451	0.153911	15.5498	0.0863634	15.59	0.103047
			15.5536	0.153414	15.5583	0.0863754	15.5987	0.10298
			15.5621	0.153002	15.5669	0.0863874	15.6075	0.102974
			15.5707	0.152642	15.5754	0.0863992	15.6163	0.103035
			15.5792	0.152306	15.5839	0.0864102	15.625	0.103077
			15.5877	0.151982	15.5925	0.0864202	15.6338	0.103088
			15.5963	0.151653	15.601	0.0864288	15.6426	0.103113
			15.6048	0.151314	15.6095	0.0864358	15.6514	0.103201
			15.6133	0.150909	15.6181	0.0864411	15.6601	0.103316
			15.6219	0.15049	15.6266	0.0864446	15.6689	0.103399
			15.6304	0.150093	15.6351	0.0864462	15.6777	0.103474
			15.6389	0.149727	15.6437	0.0864462	15.6865	0.103503
			15.6475	0.149373	15.6522	0.0864445	15.6952	0.103515
			15.656	0.149036	15.6607	0.0864413	15.704	0.103598
			15.6645	0.148713	15.6693	0.0864368	15.7128	0.103705
			15.6731	0.148448	15.6778	0.0864313	15.7215	0.103832
			15.6816	0.148227	15.6863	0.086425	15.7303	0.103969
			15.6901	0.148031	15.6949	0.086418	15.7391	0.104082
			15.6987	0.147842	15.7034	0.0864107	15.7479	0.104235
			15.7072	0.147652	15.7119	0.0864032	15.7566	0.10446
			15.7157	0.147436	15.7205	0.0863958	15.7654	0.10467
			15.7243	0.147271	15.729	0.0863884	15.7742	0.1048
			15.7328	0.147127	15.7375	0.0863813	15.7829	0.104946
			15.7413	0.146973	15.7461	0.0863744	15.7917	0.105087
			15.7499	0.146763	15.7546	0.0863677	15.8005	0.105221
			15.7584	0.14657	15.7631	0.0863612	15.8093	0.105435
			15.7669	0.146406	15.7717	0.0863547	15.818	0.105654
			15.7755	0.146253	15.7802	0.0863484	15.8268	0.105866
			15.784	0.146103	15.7887	0.086342	15.8356	0.106094
			15.7925	0.145965	15.7973	0.0863356	15.8443	0.106313
			15.8011	0.145952	15.8058	0.0863292	15.8531	0.106602
			15.8096	0.146013	15.8143	0.0863228	15.8619	0.106956
			15.8181	0.14608	15.8229	0.0863164	15.8707	0.107248
			15.8267	0.146139	15.8314	0.0863101	15.8794	0.107533
			15.8352	0.146164	15.8399	0.086304	15.8882	0.107798
			15.8437	0.146145	15.8485	0.0862982	15.897	0.108027
			15.8523	0.146083	15.857	0.0862926	15.9058	0.108315
			15.8608	0.145999	15.8655	0.0862875	15.9145	0.10867
			15.8693	0.145905	15.8741	0.0862827	15.9233	0.109026
			15.8779	0.145806	15.8826	0.0862784	15.9321	0.109375
			15.8864	0.145758	15.8911	0.0862745	15.9408	0.109757
			15.8949	0.145767	15.8997	0.086271	15.9496	0.110175
			15.9035	0.145773	15.9082	0.0862678	15.9584	0.11065
			15.912	0.145755	15.9167	0.0862648	15.9672	0.111125
			15.9205	0.145825	15.9252	0.086262	15.9759	0.111558
			15.9291	0.145991	15.9338	0.0862592	15.9847	0.111986
			15.9376	0.146195	15.9423	0.0862563	15.9935	0.112382
			15.9461	0.146389	15.9508	0.0862532	16.0022	0.112772
			15.9547	0.146559	15.9594	0.08625	16.011	0.113231
			15.9632	0.146673	15.9679	0.0862465	16.0198	0.113753
			15.9717	0.146758	15.9764	0.0862429	16.0286	0.114321
			15.9803	0.146834	15.985	0.086239	16.0373	0.114872
			15.9888	0.146943	15.9935	0.0862349	16.0461	0.115408
			15.9973	0.147166	16.002	0.0862307	16.0549	0.116037
			16.0059	0.14752	16.0106	0.0862263	16.0636	0.116713
			16.0144	0.147912	16.0191	0.0862218	16.0724	0.11736
			16.0229	0.148261	16.0276	0.0862173	16.0812	0.117964
			16.0315	0.148553	16.0362	0.0862129	16.09	0.118546
			16.04	0.148766	16.0447	0.086209	16.0987	0.119145
			16.0485	0.149126	16.0532	0.0862059	16.1075	0.119765
			16.0571	0.149619	16.0618	0.0862047	16.1163	0.120453
			16.0656	0.150104	16.0703	0.0862071	16.1251	0.121229
			16.0741	0.150543	16.0788	0.0862156	16.1338	0.121975
			16.0827	0.150939	16.0874	0.0862343	16.1426	0.122695
			16.0912	0.151271	16.0959	0.0862695	16.1514	0.123515
			16.0997	0.151535	16.1044	0.0863297	16.1601	0.124389
			16.1083	0.151858	16.113	0.0864266	16.1689	0.125273
			16.1168	0.152276	16.1215	0.086575	16.1777	0.126113
			16.1253	0.152724	16.13	0.0867924	16.1865	0.126914
			16.1339	0.15318	16.1386	0.0870984	16.1952	0.127682
			16.1424	0.153635	16.1471	0.0875132	16.204	0.128455
			16.1509	0.154284	16.1556	0.0880551	16.2128	0.129346
			16.1595	0.155099	16.1642	0.0887392	16.2215	0.130312
			16.168	0.155891	16.1727	0.0895744	16.2303	0.13128
			16.1765	0.156601	16.1812	0.0905619	16.2391	0.132215
			16.1851	0.157193	16.1898	0.0916949	16.2479	0.133192
			16.1936	0.157818	16.1983	0.0929582	16.2566	0.134263
			16.2021	0.158472	16.2068	0.0943299	16.2654	0.135366
			16.2107	0.159119	16.2154	0.0957833	16.2742	0.136435
			16.2192	0.15986	16.2239	0.0972898	16.2829	0.137464
			16.2277	0.160612	16.2324	0.0988211	16.2917	0.138447
			16.2363	0.161315	16.241	0.100352	16.3005	0.139415
			16.2448	0.16208	16.2495	0.10186	16.3093	0.140444
			16.2533	0.162864	16.258	0.103328	16.318	0.141561
			16.2619	0.163623	16.2666	0.104746	16.3268	0.142736
			16.2704	0.16434	16.2751	0.106103	16.3356	0.143909
			16.2789	0.165048	16.2836	0.107398	16.3444	0.145067
			16.2875	0.165766	16.2922	0.108628	16.3531	0.146404
			16.296	0.166473	16.3007	0.109793	16.3619	0.148179
			16.3045	0.16725	16.3092	0.110897	16.3707	0.149915
			16.3131	0.168173	16.3178	0.111942	16.3794	0.151259
			16.3216	0.169094	16.3263	0.112934	16.3882	0.152469
			16.3301	0.16994	16.3348	0.113877	16.397	0.153626
			16.3387	0.170815	16.3434	0.114781	16.4058	0.154799
			16.3472	0.171896	16.3519	0.115655	16.4145	0.156083
			16.3557	0.17301	16.3604	0.116511	16.4233	0.157481
			16.3643	0.174054	16.369	0.117365	16.4321	0.158841
			16.3728	0.175038	16.3775	0.118236	16.4408	0.160174
			16.3813	0.175975	16.386	0.119144	16.4496	0.161587
			16.3899	0.176927	16.3946	0.120112	16.4584	0.163099
			16.3984	0.177924	16.4031	0.121162	16.4672	0.16467
			16.4069	0.179005	16.4116	0.122312	16.4759	0.166172
			16.4155	0.180229	16.4202	0.123577	16.4847	0.167608
			16.424	0.181479	16.4287	0.124965	16.4935	0.169033
			16.4325	0.182699	16.4372	0.126476	16.5022	0.170435
			16.4411	0.183866	16.4458	0.1281	16.511	0.17193
			16.4496	0.184966	16.4543	0.129821	16.5198	0.173568
			16.4581	0.18604	16.4628	0.131616	16.5286	0.175273
			16.4667	0.187124	16.4714	0.133459	16.5373	0.176979
			16.4752	0.188153	16.4799	0.135323	16.5461	0.178685
			16.4837	0.189279	16.4884	0.137182	16.5549	0.180497
			16.4923	0.190698	16.497	0.139017	16.5637	0.182441
			16.5008	0.192197	16.5055	0.140809	16.5724	0.184434
			16.5093	0.19371	16.514	0.14255	16.5812	0.186372
			16.5179	0.195194	16.5226	0.144236	16.59	0.188271
			16.5264	0.196738	16.5311	0.145872	16.5987	0.190119
			16.5349	0.198464	16.5396	0.147465	16.6075	0.192051
			16.5435	0.200157	16.5482	0.149031	16.6163	0.194226
			16.552	0.201844	16.5567	0.15059	16.6251	0.196533
			16.5605	0.203683	16.5652	0.152164	16.6338	0.198904
			16.5691	0.205501	16.5738	0.153777	16.6426	0.201317
			16.5776	0.207247	16.5823	0.155451	16.6514	0.203852
			16.5861	0.209116	16.5908	0.157207	16.6601	0.206672
			16.5947	0.211137	16.5994	0.159058	16.6689	0.209629
			16.6032	0.213301	16.6079	0.161012	16.6777	0.212527
			16.6117	0.215637	16.6164	0.16307	16.6865	0.215441
			16.6203	0.217946	16.625	0.165228	16.6952	0.218369
			16.6288	0.220349	16.6335	0.167475	16.704	0.221311
			16.6373	0.222829	16.642	0.169803	16.7128	0.224519
			16.6459	0.225231	16.6506	0.172201	16.7215	0.22805
			16.6544	0.22773	16.6591	0.174664	16.7303	0.231746
			16.6629	0.230588	16.6676	0.177192	16.7391	0.23556
			16.6715	0.233855	16.6762	0.17979	16.7479	0.239513
			16.68	0.237253	16.6847	0.182466	16.7566	0.243784
			16.6885	0.240585	16.6932	0.185232	16.7654	0.2484
			16.6971	0.243953	16.7018	0.188102	16.7742	0.253134
			16.7056	0.247293	16.7103	0.191085	16.783	0.257848
			16.7141	0.250702	16.7188	0.194192	16.7917	0.262575
			16.7227	0.254373	16.7274	0.197428	16.8005	0.267336
			16.7312	0.258362	16.7359	0.200798	16.8093	0.272375
			16.7397	0.26255	16.7444	0.204306	16.818	0.277891
			16.7483	0.266865	16.753	0.207953	16.8268	0.283762
			16.7568	0.27144	16.7615	0.211744	16.8356	0.289807
			16.7653	0.276531	16.77	0.215683	16.8444	0.296023
			16.7739	0.281984	16.7786	0.219774	16.8531	0.302639
			16.7824	0.287392	16.7871	0.224025	16.8619	0.309799
			16.7909	0.292677	16.7956	0.228443	16.8707	0.317484
			16.7995	0.298135	16.8042	0.233034	16.8794	0.325261
			16.808	0.303864	16.8127	0.237809	16.8882	0.332805
			16.8165	0.309803	16.8212	0.242776	16.897	0.340806
			16.8251	0.316179	16.8298	0.247944	16.9058	0.349805
			16.8336	0.322802	16.8383	0.253322	16.9145	0.358766
			16.8421	0.329749	16.8468	0.258918	16.9233	0.367355
			16.8507	0.336903	16.8554	0.26474	16.9321	0.376213
			16.8592	0.344119	16.8639	0.270793	16.9408	0.38524
			16.8677	0.351543	16.8724	0.27708	16.9496	0.394454
			16.8763	0.359182	16.881	0.283604	16.9584	0.404341
			16.8848	0.367229	16.8895	0.290365	16.9672	0.41479
			16.8933	0.375421	16.898	0.297362	16.9759	0.42511
			16.9019	0.383888	16.9066	0.304592	16.9847	0.435285
			16.9104	0.392423	16.9151	0.312054	16.9935	0.445864
			16.9189	0.401152	16.9236	0.319745	17.0023	0.456207
			16.9275	0.410242	16.9322	0.327662	17.011	0.466507
			16.936	0.419752	16.9407	0.335803	17.0198	0.477626
			16.9445	0.429561	16.9492	0.344164	17.0286	0.489118
			16.9531	0.439443	16.9578	0.352744	17.0373	0.500696
			16.9616	0.449511	16.9663	0.36154	17.0461	0.512318
			16.9701	0.459935	16.9748	0.370552	17.0549	0.52443
			16.9787	0.47057	16.9834	0.37978	17.0637	0.537262
			16.9872	0.481413	16.9919	0.389223	17.0724	0.550157
			16.9957	0.49262	17.0004	0.398882	17.0812	0.562581
			17.0043	0.503659	17.009	0.408759	17.09	0.574718
			17.0128	0.51473	17.0175	0.418853	17.0987	0.586501
			17.0213	0.526054	17.026	0.429164	17.1075	0.598207
			17.0299	0.537569	17.0346	0.439688	17.1163	0.610672
			17.0384	0.549298	17.0431	0.450423	17.1251	0.623683
			17.0469	0.561225	17.0516	0.46136	17.1338	0.636663
			17.0555	0.573428	17.0602	0.47249	17.1426	0.649433
			17.064	0.585751	17.0687	0.483804	17.1514	0.662268
			17.0725	0.598628	17.0772	0.49529	17.1601	0.675716
			17.0811	0.611367	17.0858	0.506938	17.1689	0.689361
			17.0896	0.623595	17.0943	0.518738	17.1777	0.702423
			17.0981	0.635786	17.1028	0.530679	17.1865	0.714905
			17.1067	0.648014	17.1114	0.542754	17.1952	0.726906
			17.1152	0.660141	17.1199	0.554954	17.204	0.738352
			17.1237	0.672435	17.1284	0.567272	17.2128	0.75014
			17.1323	0.684824	17.137	0.5797	17.2216	0.762633
			17.1408	0.69732	17.1455	0.592226	17.2303	0.7753
			17.1493	0.709693	17.154	0.604838	17.2391	0.787521
			17.1579	0.721953	17.1626	0.617524	17.2479	0.799018
			17.1664	0.734227	17.1711	0.630265	17.2566	0.810654
			17.1749	0.746288	17.1796	0.643044	17.2654	0.822661
			17.1835	0.758294	17.1882	0.65584	17.2742	0.834219
			17.192	0.770214	17.1967	0.668632	17.283	0.845
			17.2005	0.781879	17.2052	0.6814	17.2917	0.855131
			17.2091	0.793196	17.2138	0.69412	17.3005	0.864456
			17.2176	0.804368	17.2223	0.706773	17.3093	0.873596
			17.2261	0.815519	17.2308	0.719338	17.318	0.883131
			17.2347	0.826482	17.2394	0.731796	17.3268	0.892624
			17.2432	0.83724	17.2479	0.74413	17.3356	0.901765
			17.2517	0.847816	17.2564	0.756322	17.3444	0.910382
			17.2603	0.858151	17.265	0.768358	17.3531	0.918686
			17.2688	0.868194	17.2735	0.780224	17.3619	0.927004
			17.2773	0.877958	17.282	0.791906	17.3707	0.934946
			17.2859	0.887364	17.2906	0.803393	17.3794	0.942161
			17.2944	0.896287	17.2991	0.814669	17.3882	0.948764
			17.3029	0.904962	17.3076	0.825722	17.397	0.954738
			17.3115	0.913238	17.3162	0.836535	17.4058	0.960196
			17.32	0.921023	17.3247	0.847091	17.4145	0.965587
			17.3285	0.928456	17.3332	0.857369	17.4233	0.970831
			17.3371	0.935796	17.3418	0.867349	17.4321	0.975693
			17.3456	0.942789	17.3503	0.877007	17.4409	0.980077
			17.3541	0.949266	17.3588	0.886323	17.4496	0.98393
			17.3627	0.955373	17.3674	0.895278	17.4584	0.987504
			17.3712	0.961085	17.3759	0.903856	17.4672	0.990766
			17.3797	0.96648	17.3844	0.912049	17.4759	0.993475
			17.3883	0.97151	17.393	0.91985	17.4847	0.995634
			17.3968	0.976095	17.4015	0.927261	17.4935	0.997312
			17.4053	0.980251	17.41	0.934285	17.5023	0.998507
			17.4139	0.983958	17.4186	0.940932	17.511	0.999377
			17.4224	0.987221	17.4271	0.947212	17.5198	1
			17.4309	0.990067	17.4356	0.953136	17.5286	0.999869
			17.4395	0.992558	17.4442	0.958714	17.5373	0.999737
			17.448	0.994739	17.4527	0.963956	17.5461	0.999432
			17.4565	0.996579	17.4612	0.968868	17.5549	0.998414
			17.4651	0.997979	17.4698	0.97345	17.5637	0.996922
			17.4736	0.999001	17.4783	0.977703	17.5724	0.994994
			17.4821	0.999682	17.4868	0.981619	17.5812	0.99279
			17.4907	1	17.4954	0.985189	17.59	0.990247
			17.4992	0.999862	17.5039	0.988402	17.5987	0.987388
			17.5077	0.999345	17.5124	0.991245	17.6075	0.984328
			17.5163	0.998365	17.521	0.993705	17.6163	0.9809
			17.5248	0.996879	17.5295	0.995772	17.6251	0.977
			17.5333	0.995159	17.538	0.997437	17.6338	0.972762
			17.5419	0.993297	17.5466	0.998694	17.6426	0.968235
			17.5504	0.991035	17.5551	0.999541	17.6514	0.963397
			17.5589	0.988382	17.5636	0.999976	17.6602	0.958066
			17.5675	0.985374	17.5722	1	17.6689	0.952287
			17.576	0.981999	17.5807	0.999616	17.6777	0.946427
			17.5845	0.978235	17.5892	0.998825	17.6865	0.940478
			17.5931	0.974071	17.5978	0.997632	17.6952	0.934439
			17.6016	0.969751	17.6063	0.99604	17.704	0.92843
			17.6101	0.965203	17.6148	0.994054	17.7128	0.922094
			17.6187	0.960215	17.6234	0.991682	17.7216	0.915201
			17.6272	0.954857	17.6319	0.988932	17.7303	0.908015
			17.6357	0.949165	17.6404	0.985813	17.7391	0.900681
			17.6443	0.943282	17.649	0.982337	17.7479	0.893268
			17.6528	0.937128	17.6575	0.978514	17.7566	0.885482
			17.6613	0.930677	17.666	0.974357	17.7654	0.877172
			17.6699	0.924035	17.6746	0.969877	17.7742	0.868792
			17.6784	0.917302	17.6831	0.965087	17.783	0.860547
			17.6869	0.910233	17.6916	0.959996	17.7917	0.852384
			17.6955	0.902869	17.7002	0.954614	17.8005	0.844472
			17.704	0.895259	17.7087	0.94895	17.8093	0.836525
			17.7125	0.887734	17.7172	0.943013	17.818	0.82801
			17.7211	0.880152	17.7258	0.93681	17.8268	0.819127
			17.7296	0.87226	17.7343	0.930349	17.8356	0.810153
			17.7381	0.864047	17.7428	0.923639	17.8444	0.801212
			17.7467	0.855685	17.7514	0.916687	17.8531	0.792191
			17.7552	0.847182	17.7599	0.909505	17.8619	0.782657
			17.7637	0.838479	17.7684	0.902102	17.8707	0.77258
			17.7723	0.830051	17.777	0.89449	17.8795	0.762918
			17.7808	0.821694	17.7855	0.886678	17.8882	0.7538
			17.7893	0.813046	17.794	0.87868	17.897	0.744895
			17.7979	0.804068	17.8026	0.870505	17.9058	0.736288
			17.8064	0.795017	17.8111	0.862164	17.9145	0.727379
			17.8149	0.78593	17.8196	0.853668	17.9233	0.717919
			17.8235	0.77677	17.8282	0.845025	17.9321	0.708355
			17.832	0.767554	17.8367	0.836244	17.9409	0.698914
			17.8405	0.758208	17.8452	0.827337	17.9496	0.689612
			17.8491	0.748884	17.8538	0.818311	17.9584	0.680024
			17.8576	0.739553	17.8623	0.809177	17.9672	0.670069
			17.8661	0.730465	17.8708	0.799946	17.9759	0.660348
			17.8747	0.721637	17.8794	0.790629	17.9847	0.650991
			17.8832	0.712214	17.8879	0.781235	17.9935	0.641967
			17.8917	0.702602	17.8964	0.771775	18.0023	0.633417
			17.9003	0.693221	17.905	0.762259	18.011	0.624852
			17.9088	0.684054	17.9135	0.752696	18.0198	0.615771
			17.9173	0.674706	17.922	0.743096	18.0286	0.606553
			17.9259	0.665104	17.9306	0.733467	18.0373	0.597454
			17.9344	0.655743	17.9391	0.723816	18.0461	0.588577
			17.9429	0.64648	17.9476	0.714151	18.0549	0.579661
			17.9515	0.637075	17.9562	0.704478	18.0637	0.570381
			17.96	0.627543	17.9647	0.694805	18.0724	0.561167
			17.9685	0.617967	17.9732	0.685138	18.0812	0.552389
			17.9771	0.608483	17.9818	0.675483	18.09	0.543882
			17.9856	0.599185	17.9903	0.665847	18.0988	0.535765
			17.9941	0.590086	17.9988	0.656234	18.1075	0.527937
			18.0027	0.581017	18.0074	0.646649	18.1163	0.519798
			18.0112	0.571909	18.0159	0.637094	18.1251	0.511427
			18.0197	0.562909	18.0244	0.627572	18.1338	0.503143
			18.0283	0.554082	18.033	0.618085	18.1426	0.495007
			18.0368	0.545267	18.0415	0.608632	18.1514	0.487074
			18.0453	0.536427	18.05	0.599216	18.1602	0.478944
			18.0539	0.527788	18.0586	0.589836	18.1689	0.470609
			18.0624	0.519317	18.0671	0.580496	18.1777	0.462656
			18.0709	0.510763	18.0756	0.571197	18.1865	0.455086
			18.0795	0.502229	18.0842	0.561943	18.1952	0.447355
			18.088	0.493768	18.0927	0.552739	18.204	0.440055
			18.0965	0.485368	18.1012	0.543591	18.2128	0.433194
			18.1051	0.477456	18.1098	0.534504	18.2216	0.425952
			18.1136	0.46993	18.1183	0.525482	18.2303	0.418683
			18.1221	0.46203	18.1268	0.516532	18.2391	0.411617
			18.1307	0.454048	18.1354	0.507656	18.2479	0.404738
			18.1392	0.446228	18.1439	0.498859	18.2566	0.397841
			18.1477	0.438449	18.1524	0.490141	18.2654	0.390785
			18.1563	0.430864	18.161	0.481507	18.2742	0.383857
			18.1648	0.423473	18.1695	0.472958	18.283	0.377296
			18.1733	0.41621	18.178	0.464495	18.2917	0.371
			18.1819	0.40885	18.1866	0.45612	18.3005	0.365139
			18.1904	0.401653	18.1951	0.447838	18.3093	0.359469
			18.1989	0.394633	18.2036	0.43965	18.3181	0.353496
			18.2075	0.387523	18.2122	0.431563	18.3268	0.346153
			18.216	0.38048	18.2207	0.42358	18.3356	0.338574
			18.2245	0.373719	18.2292	0.415707	18.3444	0.332415
			18.2331	0.367093	18.2378	0.407948	18.3531	0.326769
			18.2416	0.360534	18.2463	0.400305	18.3619	0.320575
			18.2501	0.354081	18.2548	0.39278	18.3707	0.314357
			18.2587	0.34795	18.2634	0.385373	18.3795	0.308887
			18.2672	0.341867	18.2719	0.37808	18.3882	0.303644
			18.2757	0.335708	18.2804	0.370897	18.397	0.298631
			18.2843	0.329704	18.289	0.363818	18.4058	0.293903
			18.2928	0.323738	18.2975	0.356838	18.4145	0.289167
			18.3013	0.317812	18.306	0.349952	18.4233	0.284243
			18.3099	0.312038	18.3146	0.343158	18.4321	0.279339
			18.3184	0.306314	18.3231	0.336455	18.4409	0.274591
			18.3269	0.300846	18.3316	0.32984	18.4496	0.270016
			18.3355	0.295809	18.3402	0.323314	18.4584	0.265433
			18.344	0.290834	18.3487	0.316878	18.4672	0.260738
			18.3525	0.285634	18.3572	0.31053	18.4759	0.256192
			18.3611	0.280237	18.3658	0.304275	18.4847	0.251921
			18.3696	0.275026	18.3743	0.298117	18.4935	0.247796
			18.3781	0.270141	18.3828	0.292063	18.5023	0.243953
			18.3867	0.265158	18.3914	0.286124	18.511	0.240226
			18.3952	0.260172	18.3999	0.280311	18.5198	0.236328
			18.4037	0.255324	18.4084	0.274634	18.5286	0.232408
			18.4123	0.250544	18.417	0.269103	18.5374	0.228606
			18.4208	0.245863	18.4255	0.263721	18.5461	0.224916
			18.4293	0.241356	18.434	0.258484	18.5549	0.221295
			18.4379	0.236937	18.4426	0.253385	18.5637	0.217642
			18.4464	0.232513	18.4511	0.248408	18.5724	0.214
			18.4549	0.228266	18.4596	0.243535	18.5812	0.210522
			18.4635	0.224107	18.4682	0.23875	18.59	0.207222
			18.472	0.219934	18.4767	0.234035	18.5988	0.204129
			18.4805	0.215968	18.4852	0.229381	18.6075	0.2012
			18.4891	0.212278	18.4938	0.224783	18.6163	0.198227
			18.4976	0.208471	18.5023	0.220245	18.6251	0.195174
			18.5061	0.204762	18.5108	0.215778	18.6338	0.19215
			18.5147	0.201152	18.5194	0.211397	18.6426	0.189212
			18.5232	0.197485	18.5279	0.207121	18.6514	0.186429
			18.5317	0.193916	18.5364	0.202967	18.6602	0.183642
			18.5403	0.190618	18.545	0.198951	18.6689	0.180782
			18.5488	0.187357	18.5535	0.195083	18.6777	0.178034
			18.5573	0.184038	18.562	0.191369	18.6865	0.175433
			18.5659	0.180707	18.5706	0.187806	18.6952	0.172956
			18.5744	0.177514	18.5791	0.184384	18.704	0.170616
			18.5829	0.174471	18.5876	0.181089	18.7128	0.168342
			18.5915	0.171538	18.5962	0.177899	18.7216	0.166002
			18.6	0.168739	18.6047	0.17479	18.7303	0.163637
			18.6085	0.165954	18.6132	0.171734	18.7391	0.161358
			18.6171	0.163177	18.6218	0.168704	18.7479	0.159173
			18.6256	0.160541	18.6303	0.165677	18.7567	0.157031
			18.6341	0.157981	18.6388	0.162636	18.7654	0.154839
			18.6427	0.155437	18.6474	0.159569	18.7742	0.152665
			18.6512	0.152846	18.6559	0.156475	18.783	0.150631
			18.6597	0.150333	18.6644	0.15336	18.7917	0.14847
			18.6683	0.147963	18.673	0.150239	18.8005	0.146092
			18.6768	0.145625	18.6815	0.14713	18.8093	0.144041
			18.6853	0.14318	18.69	0.144058	18.8181	0.142271
			18.6939	0.140667	18.6986	0.141044	18.8268	0.140475
			18.7024	0.138265	18.7071	0.13811	18.8356	0.138742
			18.7109	0.136062	18.7156	0.135276	18.8444	0.137099
			18.7195	0.133903	18.7242	0.132553	18.8531	0.135504
			18.728	0.131712	18.7327	0.12995	18.8619	0.133875
			18.7365	0.129562	18.7412	0.127472	18.8707	0.132234
			18.7451	0.127477	18.7498	0.12512	18.8795	0.130665
			18.7536	0.125441	18.7583	0.122893	18.8882	0.129196
			18.7621	0.123468	18.7668	0.120787	18.897	0.127793
			18.7707	0.121557	18.7754	0.118797	18.9058	0.126464
			18.7792	0.119744	18.7839	0.116918	18.9145	0.125185
			18.7877	0.118042	18.7924	0.115144	18.9233	0.123874
			18.7963	0.116403	18.801	0.113471	18.9321	0.122569
			18.8048	0.114646	18.8095	0.111892	18.9409	0.121282
			18.8133	0.112763	18.818	0.110402	18.9496	0.120064
			18.8219	0.110919	18.8266	0.108996	18.9584	0.118905
			18.8304	0.109084	18.8351	0.10767	18.9672	0.117709
			18.8389	0.107314	18.8436	0.106418	18.976	0.116535
			18.8475	0.105712	18.8522	0.105235	18.9847	0.115446
			18.856	0.104255	18.8607	0.104115	18.9935	0.114397
			18.8645	0.102912	18.8692	0.103055	19.0023	0.113394
			18.8731	0.10163	18.8778	0.102045	19.011	0.112469
			18.8816	0.100402	18.8863	0.101078	19.0198	0.11154
			18.8901	0.0990777	18.8948	0.100142	19.0286	0.110598
			18.8987	0.0977622	18.9034	0.099226	19.0374	0.10969
			18.9072	0.0965185	18.9119	0.098312	19.0461	0.108835
			18.9157	0.0953332	18.9204	0.0973811	19.0549	0.108005
			18.9243	0.0941302	18.929	0.0964122	19.0637	0.10719
			18.9328	0.0929164	18.9375	0.0953831	19.0724	0.106391
			18.9413	0.0917105	18.946	0.0942715	19.0812	0.105611
			18.9499	0.0904984	18.9546	0.0930583	19.09	0.104876
			18.9584	0.0893536	18.9631	0.0917304	19.0988	0.104152
			18.9669	0.0883068	18.9716	0.0902814	19.1075	0.103485
			18.9755	0.0873039	18.9802	0.0887128	19.1163	0.10286
			18.984	0.0863683	18.9887	0.0870351	19.1251	0.102237
			18.9925	0.0855167	18.9972	0.0852661	19.1338	0.101661
			19.0011	0.0845341	19.0058	0.0834298	19.1426	0.10109
			19.0096	0.0835638	19.0143	0.0815528	19.1514	0.100527
			19.0181	0.0826716	19.0228	0.0796622	19.1602	0.100025
			19.0267	0.0818317	19.0314	0.077784	19.1689	0.0995406
			19.0352	0.0808967	19.0399	0.0759406	19.1777	0.0990203
			19.0437	0.0799238	19.0484	0.0741492	19.1865	0.0985456
			19.0523	0.0790427	19.057	0.0724224	19.1953	0.0980966
			19.0608	0.0782622	19.0655	0.0707689	19.204	0.0976373
			19.0693	0.0775654	19.074	0.0691936	19.2128	0.0972346
			19.0779	0.0769585	19.0826	0.0676977	19.2216	0.0968742
			19.0864	0.0764976	19.0911	0.0662805	19.2303	0.0965039
			19.0949	0.0761541	19.0996	0.06494	19.2391	0.0961547
			19.1035	0.0757297	19.1082	0.063674	19.2479	0.0958436
			19.112	0.0751535	19.1167	0.0624793	19.2567	0.0955643
			19.1205	0.0744707	19.1252	0.0613519	19.2654	0.0952686
			19.1291	0.073747	19.1338	0.0602885	19.2742	0.0949712
			19.1376	0.0729698	19.1423	0.0592858	19.283	0.0947122
			19.1461	0.0722275	19.1508	0.0583406	19.2917	0.0944263
			19.1547	0.0715686	19.1594	0.0574501	19.3005	0.0941127
			19.1632	0.0709799	19.1679	0.0566108	19.3093	0.0938895
			19.1717	0.0704114	19.1764	0.0558197	19.3181	0.0937249
			19.1803	0.069842	19.185	0.0550739	19.3268	0.0935314
			19.1888	0.0692941	19.1935	0.0543713	19.3356	0.0933459
			19.1973	0.068753	19.202	0.0537092	19.3444	0.093154
			19.2059	0.0682347	19.2106	0.0530848	19.3531	0.0929806
			19.2144	0.0677058	19.2191	0.0524958	19.3619	0.0928633
			19.2229	0.0671892	19.2276	0.0519403	19.3707	0.0927811
			19.2315	0.0667037	19.2362	0.0514165	19.3795	0.0926456
			19.24	0.0662137	19.2447	0.0509232	19.3882	0.09249
			19.2485	0.0658284	19.2532	0.0504583	19.397	0.0923408
			19.2571	0.0655181	19.2618	0.0500201	19.4058	0.0922015
			19.2656	0.0652311	19.2703	0.0496073	19.4146	0.0921152
			19.2741	0.0649612	19.2788	0.0492186	19.4233	0.092057
			19.2827	0.064665	19.2874	0.0488529	19.4321	0.0920011
			19.2912	0.064325	19.2959	0.0485093	19.4409	0.0919209
			19.2997	0.0639683	19.3044	0.0481864	19.4496	0.09186
			19.3083	0.0636395	19.313	0.0478827	19.4584	0.0918421
			19.3168	0.0633458	19.3215	0.0475971	19.4672	0.0918335
			19.3253	0.0630791	19.33	0.0473286	19.476	0.0917791
			19.3339	0.0628355	19.3386	0.0470762	19.4847	0.0917543
			19.3424	0.0626097	19.3471	0.0468391	19.4935	0.0917216
			19.3509	0.0623984	19.3556	0.0466166	19.5023	0.0916279
			19.3595	0.0621663	19.3642	0.0464076	19.511	0.0915818
			19.368	0.0619304	19.3727	0.046211	19.5198	0.0915768
			19.3765	0.0616965	19.3812	0.046026	19.5286	0.091575
			19.3851	0.061468	19.3898	0.0458521	19.5374	0.091564
			19.3936	0.0612483	19.3983	0.0456884	19.5461	0.0915355
			19.4021	0.0610118	19.4068	0.0455345	19.5549	0.0915446
			19.4107	0.0607495	19.4154	0.0453897	19.5637	0.0915821
			19.4192	0.0604851	19.4239	0.0452539	19.5724	0.0915851
			19.4277	0.0602285	19.4324	0.0451264	19.5812	0.0915746
			19.4363	0.0599627	19.441	0.045006	19.59	0.0915642
			19.4448	0.059785	19.4495	0.0448921	19.5988	0.0914751
			19.4533	0.0596554	19.458	0.0447841	19.6075	0.0914509
			19.4619	0.059532	19.4666	0.0446814	19.6163	0.0914554
			19.4704	0.0594079	19.4751	0.0445836	19.6251	0.0914571
			19.4789	0.0592847	19.4836	0.0444904	19.6339	0.0914588
			19.4875	0.059161	19.4922	0.0444018	19.6426	0.0914615
			19.496	0.0590807	19.5007	0.0443178	19.6514	0.0914641
			19.5045	0.0590307	19.5092	0.0442381	19.6602	0.0914737
			19.5131	0.0589834	19.5178	0.0441623	19.6689	0.0914783
			19.5216	0.0589334	19.5263	0.0440904	19.6777	0.0914745
			19.5301	0.0588425	19.5348	0.0440221	19.6865	0.0914707
			19.5387	0.0586966	19.5434	0.0439576	19.6953	0.0914117
			19.5472	0.0585291	19.5519	0.0438965	19.704	0.0913279
			19.5557	0.0583929	19.5604	0.0438388	19.7128	0.0912741
			19.5643	0.0583028	19.569	0.0437843	19.7216	0.0913098
			19.5728	0.0582417	19.5775	0.0437327	19.7303	0.0913055
			19.5813	0.0583146	19.586	0.0436839	19.7391	0.0913012
			19.5899	0.0584053	19.5946	0.0436378	19.7479	0.0912858
			19.5984	0.0584387	19.6031	0.0435942	19.7567	0.0912884
			19.6069	0.0583286	19.6116	0.0435536	19.7654	0.0912853
			19.6155	0.05806	19.6202	0.0435158	19.7742	0.0912821
			19.624	0.0576729	19.6287	0.0434802	19.783	0.0912499
			19.6325	0.0573261	19.6372	0.0434466	19.7917	0.0911905
			19.6411	0.0570657	19.6458	0.043415	19.8005	0.0911143
			19.6496	0.0568767	19.6543	0.0433854	19.8093	0.0910715
			19.6581	0.0567254	19.6628	0.0433575	19.8181	0.0910586
			19.6667	0.0565848	19.6714	0.0433313	19.8268	0.0910443
			19.6752	0.0564493	19.6799	0.0433066	19.8356	0.0910082
			19.6837	0.056247	19.6884	0.0432832	19.8444	0.0909556
			19.6923	0.0560207	19.697	0.043261	19.8532	0.0909349
			19.7008	0.0558623	19.7055	0.0432399	19.8619	0.0909312
			19.7093	0.0557335	19.714	0.0432195	19.8707	0.0909275
			19.7179	0.0556041	19.7226	0.0431998	19.8795	0.0908753
			19.7264	0.0554337	19.7311	0.0431805	19.8882	0.0908077
			19.7349	0.055318	19.7396	0.0431616	19.897	0.0907097
			19.7435	0.055247	19.7482	0.0431428	19.9058	0.0906371
			19.752	0.0551756	19.7567	0.0431243	19.9146	0.0905893
			19.7605	0.0550969	19.7652	0.0431058	19.9233	0.0905525
			19.7691	0.0549911	19.7738	0.043088	19.9321	0.0905316
			19.7776	0.0549374	19.7823	0.0430709	19.9409	0.0905107
			19.7861	0.0549042	19.7908	0.043054	19.9496	0.0904384
			19.7947	0.0548586	19.7994	0.0430375	19.9584	0.0904271
			19.8032	0.054789	19.8079	0.0430216	19.9672	0.0904017
			19.8117	0.0545633	19.8164	0.0430064	19.976	0.0903561
			19.8203	0.0543306	19.825	0.0429923	19.9847	0.0902993
			19.8288	0.0541567	19.8335	0.0429792	19.9935	0.0902234
			19.8373	0.054014	19.842	0.0429673	20.0023	0.0901258
			19.8459	0.0538425	19.8506	0.0429566	20.011	0.0900626
			19.8544	0.0536201	19.8591	0.042947	20.0198	0.0900125
			19.8629	0.0533978	19.8676	0.0429386	20.0286	0.0899729
			19.8715	0.0531997	19.8762	0.0429312	20.0374	0.0899565
			19.88	0.0530128	19.8847	0.0429247	20.0461	0.0898675
			19.8885	0.0528305	19.8932	0.0429189	20.0549	0.0898215
			19.8971	0.0525803	19.9018	0.0429138	20.0637	0.089814
			19.9056	0.0523503	19.9103	0.0429093	20.0725	0.0898064
			19.9141	0.0521674	19.9188	0.0429053	20.0812	0.0897672
			19.9227	0.0520154	19.9274	0.0429018	20.09	0.0897109
			19.9312	0.0518844	19.9359	0.0428989	20.0988	0.0895746
			19.9397	0.0517669	19.9444	0.0428964	20.1075	0.0894818
			19.9483	0.0516483	19.953	0.0428944	20.1163	0.0894802
			19.9568	0.0515227	19.9615	0.0428929	20.1251	0.0894605
			19.9653	0.0513784	19.97	0.0428917	20.1339	0.0894152
			19.9739	0.0512121	19.9786	0.0428908	20.1426	0.0893556
			19.9824	0.0510262	19.9871	0.0428902	20.1514	0.0893136
			19.9909	0.0507978	19.9956	0.0428898	20.1602	0.0893027
			19.9995	0.0505945	20.0042	0.0428896	20.1689	0.0892945
			20.008	0.0504169	20.0127	0.0428897	20.1777	0.0892666
			20.0165	0.0502478	20.0212	0.0428899	20.1865	0.0892085
			20.0251	0.0500772	20.0298	0.0428904	20.1953	0.0891106
			20.0336	0.0498618	20.0383	0.042891	20.204	0.0890158
			20.0421	0.0496335	20.0468	0.0428919	20.2128	0.0889816
			20.0507	0.0495972	20.0554	0.042893	20.2216	0.0889658
			20.0592	0.0496418	20.0639	0.0428942	20.2303	0.0889501
			20.0677	0.0496766	20.0724	0.0428956	20.2391	0.0889219
			20.0763	0.0495735	20.081	0.0428971	20.2479	0.08883
			20.0848	0.0493213	20.0895	0.0428988	20.2567	0.0887817
			20.0933	0.0491127	20.098	0.042901	20.2654	0.0887774
			20.1019	0.0489719	20.1066	0.0429038	20.2742	0.0887732
			20.1104	0.0488281	20.1151	0.0429065	20.283	0.0887264
			20.1189	0.0486615	20.1236	0.0429088	20.2918	0.0886718
			20.1275	0.0485022	20.1322	0.0429108	20.3005	0.0885559
			20.136	0.0483465	20.1407	0.0429124	20.3093	0.088454
			20.1445	0.0481867	20.1492	0.0429134	20.3181	0.0883165
			20.1531	0.0480072	20.1578	0.0429138	20.3268	0.0882925
			20.1616	0.0478389	20.1663	0.0429135	20.3356	0.0882874
			20.1701	0.0478462	20.1748	0.0429127	20.3444	0.0882822
			20.1787	0.0479416	20.1834	0.0429115	20.3532	0.0882658
			20.1872	0.0480173	20.1919	0.0429101	20.3619	0.0882585
			20.1957	0.0480592	20.2004	0.0429086	20.3707	0.0882398
			20.2043	0.0480282	20.209	0.0429075	20.3795	0.0881893
			20.2128	0.0478453	20.2175	0.0429069	20.3882	0.0881268
			20.2213	0.0476957	20.226	0.042907	20.397	0.0880079
			20.2299	0.0476375	20.2346	0.042908	20.4058	0.0878846
			20.2384	0.0475949	20.2431	0.0429101	20.4146	0.0878605
			20.2469	0.0475424	20.2516	0.0429132	20.4233	0.0878306
			20.2555	0.0473595	20.2602	0.0429172	20.4321	0.0877677
			20.264	0.0471643	20.2687	0.0429221	20.4409	0.0877412
			20.2725	0.0470068	20.2772	0.0429277	20.4496	0.0873231
			20.2811	0.0468707	20.2858	0.0429338	20.4584	0.0872678
			20.2896	0.0467816	20.2943	0.0429403	20.4672	0.0874038
			20.2981	0.0466772	20.3028	0.0429469	20.476	0.0873356
			20.3067	0.0465258	20.3114	0.0429536	20.4847	0.0872673
			20.3152	0.0462881	20.3199	0.0429603	20.4935	0.0871098
			20.3237	0.0460373	20.3284	0.0429668	20.5023	0.0869884
			20.3323	0.045809	20.337	0.0429732	20.5111	0.0869891
			20.3408	0.0455985	20.3455	0.0429795	20.5198	0.0869798
			20.3493	0.0453771	20.354	0.0429857	20.5286	0.0869705
			20.3579	0.0452616	20.3626	0.0429918	20.5374	0.0868036
			20.3664	0.0451768	20.3711	0.0429979	20.5461	0.0865654
			20.3749	0.0450614	20.3796	0.043004	20.5549	0.0863608
			20.3835	0.0448889	20.3882	0.0430101	20.5637	0.0859921
			20.392	0.0446823	20.3967	0.0430163	20.5725	0.0860394
			20.4005	0.0445425	20.4052	0.0430223	20.5812	0.0859859
			20.4091	0.0444656	20.4138	0.0430282	20.59	0.0859323
			20.4176	0.0444105	20.4223	0.0430336	20.5988	0.0857652
			20.4261	0.0443531	20.4308	0.0430385	20.6075	0.0853934
			20.4347	0.0442874	20.4394	0.0430426	20.6163	0.0853192
			20.4432	0.0441749	20.4479	0.0430459	20.6251	0.0851303
			20.4517	0.0440698	20.4564	0.0430482	20.6339	0.0851175
			20.4603	0.043985	20.465	0.0430494	20.6426	0.0848665
			20.4688	0.0439098	20.4735	0.0430496	20.6514	0.0844279
			20.4773	0.0439038	20.482	0.0430489	20.6602	0.0843351
			20.4859	0.0439243	20.4906	0.0430473	20.6689	0.0842236
			20.4944	0.0439386	20.4991	0.043045	20.6777	0.084112
			20.5029	0.0439166	20.5076	0.0430422	20.6865	0.0839791
			20.5115	0.0438492	20.5162	0.0430391	20.6953	0.0838163
			20.52	0.0437611	20.5247	0.0430357	20.704	0.0836511
			20.5285	0.0436669	20.5332	0.0430322	20.7128	0.0835122
			20.5371	0.0435687	20.5418	0.0430288	20.7216	0.0833925
			20.5456	0.0434265	20.5503	0.0430256	20.7304	0.0832992
			20.5541	0.043258	20.5588	0.0430224	20.7391	0.083178
			20.5627	0.0430813	20.5674	0.0430196	20.7479	0.0830261
			20.5712	0.0428794	20.5759	0.0430169	20.7567	0.0828947
			20.5797	0.0427265	20.5844	0.0430145	20.7654	0.0827932
			20.5883	0.0426304	20.593	0.0430124	20.7742	0.0826601
			20.5968	0.0425447	20.6015	0.0430105	20.783	0.0825179
			20.6053	0.0424544	20.61	0.0430089	20.7918	0.0823659
			20.6139	0.0423014	20.6186	0.0430075	20.8005	0.0821437
			20.6224	0.0420643	20.6271	0.0430063	20.8093	0.0819749
			20.6309	0.0417629	20.6356	0.0430054	20.8181	0.0818222
			20.6395	0.0414776	20.6442	0.0430048	20.8268	0.0816933
			20.648	0.0412281	20.6527	0.0430044	20.8356	0.0815864
			20.6565	0.0410361	20.6612	0.0430041	20.8444	0.0814184
			20.6651	0.0409238	20.6698	0.043004	20.8532	0.0812809
			20.6736	0.0408369	20.6783	0.043004	20.8619	0.0812001
			20.6821	0.040748	20.6868	0.0430039	20.8707	0.0810889
			20.6907	0.0406373	20.6954	0.0430038	20.8795	0.0809325
			20.6992	0.0403497	20.7039	0.0430035	20.8882	0.0807797
			20.7077	0.0400617	20.7124	0.043003	20.897	0.0806029
			20.7163	0.0398977	20.721	0.0430023	20.9058	0.0804113
			20.7248	0.0398114	20.7295	0.0430014	20.9146	0.0802746
			20.7333	0.0397371	20.738	0.0430004	20.9233	0.0801555
			20.7419	0.0396556	20.7466	0.0429992	20.9321	0.0800433
			20.7504	0.0394984	20.7551	0.0429981	20.9409	0.0799184
			20.7589	0.0393302	20.7636	0.042997	20.9497	0.0797714
			20.7675	0.0391811	20.7722	0.042996	20.9584	0.0794359
			20.776	0.0390434	20.7807	0.0429952	20.9672	0.0793125
			20.7845	0.038858	20.7892	0.0429946	20.976	0.0791967
			20.7931	0.0386677	20.7978	0.0429942	20.9847	0.0790809
			20.8016	0.0384956	20.8063	0.0429941	20.9935	0.0788028
			20.8101	0.038336	20.8148	0.0429943	21.0023	0.0787495
			20.8187	0.0381751	20.8234	0.0429947	21.0111	0.0786962
			20.8272	0.0380178	20.8319	0.0429952	21.0198	0.0785799
			20.8357	0.0378632	20.8404	0.0429958	21.0286	0.0782923
			20.8443	0.0377085	20.849	0.0429965	21.0374	0.0777802
			20.8528	0.0375379	20.8575	0.042997	21.0461	0.0776411
			20.8613	0.0373634	20.866	0.0429972	21.0549	0.0776091
			20.8698	0.0371936	20.8746	0.0429971	21.0637	0.0776443
			20.8784	0.036989	20.8831	0.0429963	21.0725	0.0775899
			20.8869	0.0367938	20.8916	0.0429947	21.0812	0.0775354
			20.8954	0.0366047	20.9002	0.0429922	21.09	0.0773236
			20.904	0.0364068	20.9087	0.0429886	21.0988	0.0769604
			20.9125	0.0362513	20.9172	0.0429838	21.1075	0.0766165
			20.921	0.0361974	20.9258	0.0429776	21.1163	0.0764257
			20.9296	0.0361644	20.9343	0.0429702	21.1251	0.0763507
			20.9381	0.0361082	20.9428	0.0429615	21.1339	0.0763069
			20.9466	0.0360089	20.9514	0.0429516	21.1426	0.0762631
			20.9552	0.0359224	20.9599	0.0429406	21.1514	0.0760838
			20.9637	0.0358951	20.9684	0.0429287	21.1602	0.0759932
			20.9722	0.0359174	20.977	0.0429163	21.169	0.0759111
			20.9808	0.0359519	20.9855	0.0429035	21.1777	0.0758073
			20.9893	0.0359712	20.994	0.0428907	21.1865	0.0757286
			20.9978	0.03597	21.0026	0.0428782	21.1953	0.0756122
			21.0064	0.0358927	21.0111	0.0428663	21.204	0.0754656
			21.0149	0.0357857	21.0196	0.0428553	21.2128	0.0753768
			21.0234	0.0356828	21.0282	0.0428455	21.2216	0.0753186
			21.032	0.0355499	21.0367	0.0428369	21.2304	0.0752287
			21.0405	0.0353991	21.0452	0.0428299	21.2391	0.0751263
			21.049	0.0352434	21.0538	0.0428243	21.2479	0.0750474
			21.0576	0.0350279	21.0623	0.0428204	21.2567	0.074962
			21.0661	0.0347934	21.0708	0.042818	21.2654	0.0749061
			21.0746	0.0345705	21.0794	0.0428171	21.2742	0.074846
			21.0832	0.034327	21.0879	0.0428176	21.283	0.0747537
			21.0917	0.0342644	21.0964	0.0428194	21.2918	0.0746578
			21.1002	0.034261	21.105	0.0428225	21.3005	0.0745642
			21.1088	0.0342156	21.1135	0.0428266	21.3093	0.0744673
			21.1173	0.0340948	21.122	0.0428316	21.3181	0.0743942
			21.1258	0.033973	21.1306	0.0428375	21.3268	0.0743238
			21.1344	0.0338798	21.1391	0.0428439	21.3356	0.0742791
			21.1429	0.0338078	21.1476	0.0428507	21.3444	0.0742256
			21.1514	0.03375	21.1562	0.0428577	21.3532	0.0741529
			21.16	0.0336905	21.1647	0.0428646	21.3619	0.0741524
			21.1685	0.0336238	21.1732	0.0428713	21.3707	0.0741285
			21.177	0.0335171	21.1818	0.0428776	21.3795	0.0740572
			21.1856	0.0332808	21.1903	0.0428832	21.3883	0.0740027
			21.1941	0.0329891	21.1988	0.0428882	21.397	0.0739454
			21.2026	0.0327414	21.2074	0.0428924	21.4058	0.0738546
			21.2112	0.0325481	21.2159	0.0428959	21.4146	0.0737962
			21.2197	0.0323905	21.2244	0.0428988	21.4233	0.0737825
			21.2282	0.032248	21.233	0.0429011	21.4321	0.0737688
			21.2368	0.0321133	21.2415	0.0429031	21.4409	0.0737033
			21.2453	0.0320245	21.25	0.0429048	21.4497	0.0736666
			21.2538	0.0319955	21.2586	0.0429066	21.4584	0.0736642
			21.2624	0.0320373	21.2671	0.0429085	21.4672	0.0736695
			21.2709	0.032133	21.2756	0.0429107	21.476	0.0736687
			21.2794	0.0322607	21.2842	0.0429134	21.4847	0.0736679
			21.288	0.0323832	21.2927	0.0429167	21.4935	0.0736017
			21.2965	0.0324871	21.3012	0.0429206	21.5023	0.0735362
			21.305	0.0325151	21.3098	0.042925	21.5111	0.0735218
			21.3136	0.0324468	21.3183	0.0429298	21.5198	0.0735188
			21.3221	0.0322884	21.3268	0.0429348	21.5286	0.0735104
			21.3306	0.0320668	21.3354	0.0429398	21.5374	0.073526
			21.3392	0.0317642	21.3439	0.0429446	21.5461	0.0735402
			21.3477	0.0315573	21.3524	0.0429489	21.5549	0.0735734
			21.3562	0.0314311	21.361	0.0429526	21.5637	0.0736407
			21.3648	0.0313249	21.3695	0.0429556	21.5725	0.0737216
			21.3733	0.0312073	21.378	0.0429579	21.5812	0.0737437
			21.3818	0.0310673	21.3866	0.0429595	21.59	0.0737607
			21.3904	0.0309013	21.3951	0.0429605	21.5988	0.0737905
			21.3989	0.0308042	21.4036	0.042961	21.6076	0.0737937
			21.4074	0.0307672	21.4122	0.0429612	21.6163	0.0738633
			21.416	0.0307299	21.4207	0.0429612	21.6251	0.0739711
			21.4245	0.030677	21.4292	0.042961	21.6339	0.0740898
			21.433	0.030613	21.4378	0.0429606	21.6426	0.074188
			21.4416	0.0305403	21.4463	0.0429602	21.6514	0.074267
			21.4501	0.0304934	21.4548	0.0429595	21.6602	0.074438
			21.4586	0.0304797	21.4634	0.0429586	21.669	0.0746336
			21.4672	0.0304751	21.4719	0.0429574	21.6777	0.0747659
			21.4757	0.0304705	21.4804	0.0429559	21.6865	0.0750257
			21.4842	0.0305782	21.489	0.0429539	21.6953	0.075208
			21.4928	0.0307719	21.4975	0.0429515	21.704	0.0752333
			21.5013	0.0309187	21.506	0.0429487	21.7128	0.0753775
			21.5098	0.0309794	21.5146	0.0429455	21.7216	0.0756169
			21.5184	0.0310079	21.5231	0.042942	21.7304	0.0758718
			21.5269	0.0309293	21.5316	0.0429382	21.7391	0.0761411
			21.5354	0.0307341	21.5402	0.0429343	21.7479	0.0766067
			21.544	0.0306352	21.5487	0.0429302	21.7567	0.076883
			21.5525	0.0307334	21.5572	0.0429263	21.7654	0.0770233
			21.561	0.0309549	21.5658	0.0429224	21.7742	0.0776748
			21.5696	0.0312044	21.5743	0.0429188	21.783	0.0783192
			21.5781	0.0313719	21.5828	0.0429155	21.7918	0.0788439
			21.5866	0.0314262	21.5914	0.0429125	21.8005	0.0793384
			21.5952	0.0314497	21.5999	0.04291	21.8093	0.0796555
			21.6037	0.0314671	21.6084	0.042908	21.8181	0.0800501
			21.6122	0.0314735	21.617	0.0429064	21.8269	0.0804812
			21.6208	0.0315563	21.6255	0.0429052	21.8356	0.0809464
			21.6293	0.031679	21.634	0.0429045	21.8444	0.0814194
			21.6378	0.0317994	21.6426	0.042904	21.8532	0.0818809
			21.6464	0.0319116	21.6511	0.0429038	21.8619	0.0824251
			21.6549	0.03186	21.6596	0.0429037	21.8707	0.0831493
			21.6634	0.0315872	21.6682	0.0429037	21.8795	0.0838362
			21.672	0.0314297	21.6767	0.0429037	21.8883	0.0842607
			21.6805	0.0314154	21.6852	0.0429038	21.897	0.0848096
			21.689	0.0314799	21.6938	0.0429037	21.9058	0.0859097
			21.6976	0.0315935	21.7023	0.0429037	21.9146	0.0869582
			21.7061	0.0317195	21.7108	0.0429037	21.9233	0.0876323
			21.7146	0.0318062	21.7194	0.0429037	21.9321	0.0883282
			21.7232	0.0318383	21.7279	0.0429038	21.9409	0.0890346
			21.7317	0.0319542	21.7364	0.042904	21.9497	0.0897165
			21.7402	0.0321051	21.745	0.0429043	21.9584	0.0904455
			21.7488	0.0322396	21.7535	0.0429047	21.9672	0.0912564
			21.7573	0.0323406	21.762	0.0429052	21.976	0.0920679
			21.7658	0.0324295	21.7706	0.0429057	21.9847	0.0928515
			21.7744	0.0325205	21.7791	0.0429062	21.9935	0.0936103
			21.7829	0.032608	21.7876	0.0429067	22.0023	0.0943097
			21.7914	0.0331881	21.7962	0.0429071	22.0111	0.095001
			21.8	0.0340059	21.8047	0.0429074	22.0198	0.095801
			21.8085	0.0346811	21.8132	0.0429076	22.0286	0.0966713
			21.817	0.0351559	21.8218	0.0429077	22.0374	0.0975081
			21.8256	0.0353191	21.8303	0.0429077	22.0462	0.0983268
			21.8341	0.0353379	21.8388	0.0429077	22.0549	0.0991792
			21.8426	0.0353186	21.8474	0.0429078	22.0637	0.100079
			21.8512	0.0352322	21.8559	0.0429079	22.0725	0.10103
			21.8597	0.0350064	21.8644	0.0429082	22.0812	0.101927
			21.8682	0.0348373	21.873	0.0429086	22.09	0.10276
			21.8768	0.0347604	21.8815	0.0429091	22.0988	0.10356
			21.8853	0.0347151	21.89	0.0429098	22.1076	0.104342
			21.8938	0.0349207	21.8986	0.0429104	22.1163	0.10516
			21.9024	0.0354039	21.9071	0.0429111	22.1251	0.106036
			21.9109	0.0359773	21.9156	0.0429118	22.1339	0.106936
			21.9194	0.0365239	21.9242	0.0429123	22.1426	0.107819
			21.928	0.0369821	21.9327	0.0429126	22.1514	0.108648
			21.9365	0.0373405	21.9412	0.0429127	22.1602	0.109517
			21.945	0.0377799	21.9498	0.0429125	22.169	0.110442
			21.9536	0.0382326	21.9583	0.042912	22.1777	0.111341
			21.9621	0.0386317	21.9668	0.042911	22.1865	0.11217
			21.9706	0.0389606	21.9754	0.0429095	22.1953	0.112929
			21.9792	0.0392243	21.9839	0.0429077	22.204	0.113628
			21.9877	0.0396918	21.9924	0.0429054	22.2128	0.11431
			21.9962	0.0402794	22.001	0.0429028	22.2216	0.11507
			22.0048	0.0410517	22.0095	0.0428999	22.2304	0.115846
			22.0133	0.0417631	22.018	0.0428969	22.2391	0.116581
			22.0218	0.0422771	22.0266	0.0428939	22.2479	0.117265
			22.0304	0.0425217	22.0351	0.0428911	22.2567	0.117952
			22.0389	0.0427518	22.0436	0.0428885	22.2655	0.118665
			22.0474	0.0432149	22.0522	0.0428862	22.2742	0.119375
			22.056	0.043799	22.0607	0.0428845	22.283	0.120016
			22.0645	0.0443356	22.0692	0.0428834	22.2918	0.120623
			22.073	0.0447876	22.0778	0.0428829	22.3005	0.121146
			22.0816	0.0451148	22.0863	0.0428832	22.3093	0.121576
			22.0901	0.0453064	22.0948	0.0428843	22.3181	0.122074
			22.0986	0.0453861	22.1034	0.0428863	22.3269	0.122596
			22.1072	0.0453925	22.1119	0.0428892	22.3356	0.123073
			22.1157	0.0457096	22.1204	0.0428934	22.3444	0.12354
			22.1242	0.0461586	22.129	0.0428991	22.3532	0.123957
			22.1328	0.0465154	22.1375	0.0429067	22.3619	0.124368
			22.1413	0.0467596	22.146	0.0429169	22.3707	0.124793
			22.1498	0.0469994	22.1546	0.0429306	22.3795	0.125169
			22.1584	0.0472402	22.1631	0.042949	22.3883	0.125436
			22.1669	0.047463	22.1716	0.0429736	22.397	0.125639
			22.1754	0.0476702	22.1802	0.0430061	22.4058	0.125828
			22.184	0.0478554	22.1887	0.0430483	22.4146	0.126018
			22.1925	0.0480171	22.1972	0.0431021	22.4233	0.126226
			22.201	0.0482052	22.2058	0.0431691	22.4321	0.126392
			22.2096	0.0484398	22.2143	0.0432501	22.4409	0.126517
			22.2181	0.0488375	22.2228	0.0433455	22.4497	0.126592
			22.2266	0.0494346	22.2314	0.0434548	22.4584	0.126683
			22.2352	0.0501113	22.2399	0.0435769	22.4672	0.126713
			22.2437	0.0507266	22.2484	0.0437108	22.476	0.126719
			22.2522	0.0512452	22.257	0.043856	22.4848	0.126679
			22.2608	0.0515886	22.2655	0.0440137	22.4935	0.126639
			22.2693	0.0517381	22.274	0.0441869	22.5023	0.126532
			22.2778	0.0517362	22.2825	0.0443811	22.5111	0.126383
			22.2864	0.0516068	22.2911	0.0446034	22.5198	0.126225
			22.2949	0.0515112	22.2996	0.0448618	22.5286	0.126063
			22.3034	0.0516398	22.3081	0.0451631	22.5374	0.125901
			22.312	0.0518678	22.3167	0.0455107	22.5462	0.125687
			22.3205	0.0521107	22.3252	0.0459033	22.5549	0.125445
			22.329	0.0524601	22.3337	0.0463332	22.5637	0.125225
			22.3376	0.0528884	22.3423	0.046786	22.5725	0.124932
			22.3461	0.0533595	22.3508	0.047242	22.5812	0.124596
			22.3546	0.0537743	22.3593	0.0476782	22.59	0.124237
			22.3632	0.0540937	22.3679	0.0480712	22.5988	0.123823
			22.3717	0.0542752	22.3764	0.0484001	22.6076	0.123388
			22.3802	0.0541604	22.3849	0.0486494	22.6163	0.12301
			22.3888	0.0539235	22.3935	0.0488104	22.6251	0.122598
			22.3973	0.0536765	22.402	0.0488819	22.6339	0.122119
			22.4058	0.053373	22.4105	0.0488693	22.6426	0.121666
			22.4144	0.053198	22.4191	0.0487834	22.6514	0.121185
			22.4229	0.0531158	22.4276	0.0486377	22.6602	0.120694
			22.4314	0.0530411	22.4361	0.0484471	22.669	0.120156
			22.44	0.0529634	22.4447	0.0482256	22.6777	0.119585
			22.4485	0.0527973	22.4532	0.0479857	22.6865	0.119003
			22.457	0.0525558	22.4617	0.0477372	22.6953	0.118359
			22.4656	0.0522663	22.4703	0.0474877	22.7041	0.117736
			22.4741	0.0519931	22.4788	0.0472423	22.7128	0.117133
			22.4826	0.0520475	22.4873	0.0470042	22.7216	0.11651
			22.4912	0.0522424	22.4959	0.0467754	22.7304	0.115862
			22.4997	0.0522876	22.5044	0.0465569	22.7391	0.115215
			22.5082	0.0521308	22.5129	0.0463492	22.7479	0.114521
			22.5168	0.0516377	22.5215	0.0461522	22.7567	0.113809
			22.5253	0.0508758	22.53	0.0459661	22.7655	0.113154
			22.5338	0.0501751	22.5385	0.0457904	22.7742	0.112439
			22.5424	0.0499133	22.5471	0.0456252	22.783	0.111666
			22.5509	0.0499321	22.5556	0.04547	22.7918	0.110921
			22.5594	0.0499975	22.5641	0.0453245	22.8005	0.110154
			22.568	0.050014	22.5727	0.0451883
			22.5765	0.0499645	22.5812	0.0450607
			22.585	0.0498085	22.5897	0.0449413
			22.5936	0.0496058	22.5983	0.0448294
			22.6021	0.0492694	22.6068	0.0447243
			22.6106	0.0488458	22.6153	0.0446255
			22.6192	0.0484838	22.6239	0.0445324
			22.6277	0.0481941	22.6324	0.0444445
			22.6362	0.0478532	22.6409	0.0443614
			22.6448	0.0474178	22.6495	0.0442828
			22.6533	0.0469547	22.658	0.0442083
			22.6618	0.0464934	22.6665	0.0441377
			22.6704	0.0460051	22.6751	0.0440708
			22.6789	0.04534	22.6836	0.0440073
			22.6874	0.0445991	22.6921	0.0439471
			22.696	0.0440468	22.7007	0.04389
			22.7045	0.0436135	22.7092	0.0438358
			22.713	0.0432215	22.7177	0.0437844
			22.7216	0.0428404	22.7263	0.0437358
			22.7301	0.0424569	22.7348	0.0436897
			22.7386	0.0420892	22.7433	0.0436462
			22.7472	0.0418804	22.7519	0.0436052
			22.7557	0.0418013	22.7604	0.0435666
			22.7642	0.0416567	22.7689	0.0435304
			22.7728	0.0413842	22.7775	0.0434964
			22.7813	0.0409863	22.786	0.0434647
			22.7898	0.0405563	22.7945	0.043435
			22.7984	0.0401377

## Sheet: SV-AUC
S	IC_FL	IC_FL+p150	IC_FL+NudE		S	IC_FL/Tctex/LC8/LC7	IC_FL/Tctex/LC8/LC7+p150	IC_FL/Tctex/LC8/LC7+NudE	IC_FL/Tctex/LC8	IC_FL/Tctex/LC8+p150	IC_FL/Tctex/LC8+NudE	IC_FL/LC7	IC_FL/LC7+p150	IC_FL/LC7+NudE
0	0.0031	0.00365	0.00436		0	0.00443	0.00523	0.00589	0.00566	0.00551	0.00572	0.00414	0.00594	0.00648
0.202	0.201	0.241	0.679		0.152	0.544	0.786	0.97	1.18	0.708	0.599	0.289	1.8	1.46
0.404	0.0098	0.000196	0.0646		0.303	0.000363	0.000232	6.36e-06	0.0271	0.00751	0.00502	0.203	0.0364	0.0781
0.606	0.00137	5.46e-06	0.0308		0.455	7.8e-08	2.98e-08	3.19e-16	0.000531	7.07e-05	4.31e-05	0.0673	0.00215	0.00949
0.808	0.000568	2.36e-05	0.0212		0.606	3.96e-11	1.63e-11	2.21e-15	2.16e-05	1.57e-06	9.65e-07	0.00759	0.000511	0.00287
1.01	0.00066	0.000666	0.0162		0.758	1.48e-13	1.08e-13	8.49e-15	2.68e-06	1.26e-07	8.12e-08	0.000483	0.000314	0.00149
1.21	0.00178	0.00576	0.0175		0.909	7.06e-15	5e-14	8e-15	1.08e-06	3.96e-08	2.82e-08	3.91e-05	0.000324	0.00101
1.41	0.0068	0.0109	0.0278		1.06	4.84e-15	6.7e-15	4.04e-14	1.28e-06	4.52e-08	3.71e-08	8.64e-06	0.000433	0.000866
1.62	0.0205	0.0153	0.053		1.21	3.64e-14	1.81e-13	2.07e-14	3.55e-06	1.55e-07	1.52e-07	7.61e-06	0.000697	0.000951
1.82	0.0336	0.0337	0.0992		1.36	1.74e-12	8.81e-12	6.87e-17	1.83e-05	1.22e-06	1.47e-06	2.44e-05	0.00136	0.00139
2.02	0.0298	0.0921	0.151		1.52	2.58e-10	9.95e-10	4.99e-14	0.000137	1.65e-05	2.38e-05	0.000182	0.00304	0.0027
2.22	0.0184	0.175	0.164		1.67	5.62e-08	1.43e-07	1.26e-11	0.00118	0.000272	0.000447	0.00182	0.00744	0.00677
2.42	0.0111	0.181	0.13		1.82	9.46e-06	1.58e-05	2.26e-08	0.00917	0.00395	0.00696	0.0142	0.0182	0.0207
2.63	0.00852	0.121	0.0931		1.97	0.000761	0.000931	1.61e-05	0.054	0.0386	0.0686	0.0641	0.0421	0.0696
2.83	0.0102	0.0797	0.078		2.12	0.0224	0.0226	0.0029	0.21	0.212	0.357	0.15	0.0886	0.217
3.03	0.0199	0.0731	0.0927		2.27	0.221	0.205	0.108	0.504	0.608	0.923	0.194	0.162	0.501
3.23	0.0566	0.106	0.156		2.42	0.763	0.72	0.833	0.753	0.939	1.22	0.162	0.241	0.713
3.43	0.182	0.217	0.313		2.58	1.08	1.08	1.6	0.743	0.862	0.924	0.105	0.277	0.566
3.64	0.491	0.465	0.587		2.73	0.77	0.832	1	0.538	0.547	0.474	0.0649	0.238	0.261
3.84	0.876	0.79	0.815		2.88	0.35	0.409	0.3	0.322	0.279	0.2	0.044	0.156	0.0823
4.04	0.918	0.872	0.747		3.03	0.126	0.16	0.0625	0.179	0.133	0.0823	0.0363	0.0831	0.0231
4.24	0.578	0.609	0.458		3.18	0.0436	0.0605	0.0127	0.103	0.0672	0.0389	0.0378	0.0407	0.00761
4.44	0.254	0.296	0.214		3.33	0.0167	0.0255	0.00335	0.065	0.0384	0.0226	0.0491	0.0209	0.00368
4.65	0.0937	0.12	0.0905		3.48	0.00779	0.0133	0.00136	0.0474	0.0259	0.0171	0.0761	0.0126	0.00301
4.85	0.0354	0.0493	0.0414		3.64	0.0046	0.00893	0.000906	0.0405	0.0207	0.0166	0.13	0.01	0.00424
5.05	0.0158	0.0235	0.0227		3.79	0.00346	0.00762	0.00095	0.0403	0.0194	0.0203	0.226	0.0108	0.00948
5.25	0.00902	0.014	0.0157		3.94	0.00321	0.00795	0.00143	0.046	0.0206	0.0289	0.362	0.0159	0.0285
5.45	0.00664	0.0105	0.0134		4.09	0.0035	0.00958	0.00271	0.0576	0.0239	0.0454	0.511	0.0299	0.0905
5.66	0.00607	0.00958	0.0133		4.24	0.00424	0.0124	0.00559	0.0766	0.0291	0.0732	0.601	0.0641	0.267
5.86	0.00645	0.01	0.0146		4.39	0.00544	0.0162	0.0111	0.104	0.0366	0.115	0.576	0.144	0.597
6.06	0.00738	0.0113	0.0164		4.55	0.00708	0.0205	0.0193	0.139	0.046	0.168	0.446	0.298	0.911
6.26	0.00855	0.0131	0.0182		4.7	0.00901	0.0245	0.0282	0.178	0.0572	0.222	0.291	0.517	0.895
6.46	0.00957	0.0149	0.0193		4.85	0.0112	0.0273	0.0339	0.214	0.07	0.263	0.164	0.707	0.571
6.67	0.0101	0.0163	0.0195		5	0.0133	0.0281	0.0342	0.239	0.0838	0.278	0.0838	0.737	0.254
6.87	0.0101	0.017	0.0186		5.15	0.0155	0.0273	0.0299	0.249	0.0985	0.264	0.0409	0.596	0.0881
7.07	0.00955	0.0168	0.017		5.3	0.0179	0.0255	0.0241	0.241	0.114	0.23	0.0201	0.386	0.0269
7.27	0.00882	0.0159	0.0151		5.45	0.0206	0.0233	0.0189	0.219	0.129	0.186	0.0102	0.215	0.00813
7.47	0.00808	0.0144	0.0133		5.61	0.0239	0.0213	0.0152	0.188	0.144	0.143	0.00561	0.109	0.00271
7.68	0.00745	0.0127	0.0118		5.76	0.0285	0.0199	0.0129	0.156	0.157	0.105	0.00341	0.0551	0.00109
7.88	0.00697	0.0109	0.0106		5.91	0.0351	0.0192	0.0122	0.124	0.167	0.0767	0.00234	0.0293	0.000568
8.08	0.00663	0.00936	0.00984		6.06	0.0443	0.0195	0.0129	0.0975	0.172	0.0558	0.00179	0.0173	0.000386
8.28	0.00637	0.00799	0.0094		6.21	0.0573	0.021	0.0152	0.0756	0.172	0.0408	0.00155	0.0118	0.000341
8.48	0.00617	0.00684	0.00926		6.36	0.0745	0.024	0.02	0.0583	0.165	0.0304	0.00149	0.00924	0.000382
8.69	0.00599	0.00588	0.00938		6.52	0.0971	0.029	0.0289	0.0449	0.152	0.0232	0.00158	0.00835	0.000517
8.89	0.00583	0.00511	0.00971		6.67	0.124	0.0368	0.0441	0.0349	0.136	0.0182	0.0018	0.0085	0.0008
9.09	0.00566	0.00449	0.0102		6.82	0.153	0.0487	0.0701	0.0273	0.117	0.0147	0.00218	0.00948	0.00134
9.29	0.00549	0.00399	0.0107		6.97	0.179	0.0654	0.11	0.0217	0.0981	0.0122	0.00273	0.0112	0.0023
9.49	0.0053	0.0036	0.011		7.12	0.196	0.0886	0.166	0.0174	0.0808	0.0104	0.00349	0.0137	0.00391
9.7	0.00505	0.0033	0.0112		7.27	0.197	0.118	0.232	0.0142	0.0657	0.00903	0.00451	0.0168	0.00631
9.9	0.00476	0.00307	0.011		7.42	0.182	0.152	0.295	0.0118	0.0532	0.00802	0.00575	0.02	0.00945
10.1	0.0044	0.0029	0.0105		7.58	0.154	0.187	0.33	0.00992	0.0431	0.00724	0.00725	0.0229	0.013
10.3	0.00401	0.00278	0.00973		7.73	0.119	0.216	0.323	0.00846	0.0351	0.00663	0.00888	0.0251	0.0165
10.5	0.00361	0.0027	0.00884		7.88	0.084	0.23	0.276	0.0073	0.0289	0.00615	0.0105	0.0262	0.0192
10.7	0.00322	0.00265	0.00794		8.03	0.0552	0.227	0.209	0.00637	0.0241	0.00578	0.0122	0.0261	0.0208
10.9	0.00287	0.00263	0.00712		8.18	0.0342	0.207	0.141	0.00561	0.0204	0.00549	0.0135	0.025	0.0211
11.1	0.00258	0.00262	0.00644		8.33	0.0203	0.174	0.0874	0.00497	0.0176	0.00528	0.0146	0.0233	0.0205
11.3	0.00234	0.00261	0.00592		8.48	0.0117	0.137	0.051	0.00443	0.0153	0.00514	0.0152	0.0211	0.0192
11.5	0.00216	0.0026	0.00557		8.64	0.00669	0.101	0.0289	0.00397	0.0135	0.00505	0.0155	0.019	0.0176
11.7	0.00203	0.00258	0.00537		8.79	0.00386	0.0714	0.0165	0.00358	0.0121	0.00501	0.0153	0.017	0.016
11.9	0.00195	0.00256	0.00531		8.94	0.00228	0.0487	0.00968	0.00324	0.0109	0.00499	0.0148	0.0152	0.0147
12.1	0.00192	0.00253	0.00538		9.09	0.0014	0.0326	0.006	0.00295	0.00986	0.005	0.0141	0.0137	0.0136
12.3	0.00193	0.00251	0.00553		9.24	0.000901	0.0217	0.00399	0.0027	0.00901	0.00501	0.0132	0.0124	0.0128
12.5	0.00198	0.00248	0.00575		9.39	0.000611	0.0144	0.00288	0.0025	0.00826	0.00502	0.0122	0.0114	0.0122
12.7	0.00207	0.00245	0.006		9.55	0.000439	0.00979	0.00227	0.00233	0.00761	0.00502	0.0111	0.0104	0.0119
12.9	0.00217	0.00242	0.00622		9.7	0.000334	0.00678	0.00196	0.0022	0.00703	0.00498	0.00999	0.00964	0.0118
13.1	0.0023	0.00239	0.00639		9.85	0.000269	0.00483	0.00184	0.00209	0.00652	0.00492	0.00894	0.00897	0.0117
13.3	0.00242	0.00234	0.00648		10	0.000228	0.00356	0.00188	0.00201	0.00606	0.00482	0.00789	0.00832	0.0117
13.5	0.00253	0.00228	0.00646		10.2	0.000203	0.00272	0.00203	0.00195	0.00565	0.00469	0.00695	0.00771	0.0116
13.7	0.00262	0.00221	0.00636		10.3	0.000189	0.00216	0.00233	0.00191	0.00528	0.00453	0.00605	0.00712	0.0114
13.9	0.00266	0.00213	0.00617		10.5	0.000182	0.00177	0.00277	0.00189	0.00495	0.00437	0.00524	0.00655	0.0109
14.1	0.00267	0.00205	0.00594		10.6	0.000181	0.00151	0.00337	0.00187	0.00466	0.00419	0.00451	0.006	0.0102
14.3	0.00264	0.00197	0.00569		10.8	0.000185	0.00133	0.00412	0.00187	0.00439	0.00401	0.00384	0.00546	0.00918
14.5	0.0026	0.00189	0.00545		10.9	0.000192	0.00121	0.00499	0.00187	0.00416	0.00384	0.00327	0.00493	0.00794
14.7	0.00255	0.00182	0.00524		11.1	0.000204	0.00113	0.00592	0.00188	0.00395	0.00368	0.00277	0.00444	0.00657
14.9	0.00251	0.00177	0.00506		11.2	0.000219	0.00109	0.0068	0.0019	0.00377	0.00353	0.00234	0.00398	0.00519
15.2	0.00247	0.00173	0.00492		11.4	0.000238	0.00108	0.00751	0.00193	0.00361	0.00341	0.00198	0.00354	0.00393
15.4	0.00243	0.0017	0.00481		11.5	0.000262	0.0011	0.00791	0.00196	0.00349	0.0033	0.00168	0.00315	0.00285
15.6	0.00241	0.00168	0.00474		11.7	0.000289	0.00114	0.00794	0.002	0.00338	0.00322	0.00143	0.00279	0.00199
15.8	0.0024	0.00168	0.00469		11.8	0.000321	0.00121	0.00756	0.00205	0.0033	0.00315	0.00124	0.00247	0.00135
16	0.00239	0.00169	0.00465		12	0.000358	0.0013	0.0069	0.00211	0.00325	0.00312	0.00108	0.0022	0.000893
16.2	0.00238	0.00171	0.00462		12.1	0.000401	0.00143	0.00607	0.00217	0.00323	0.00311	0.000958	0.00196	0.000584
16.4	0.00238	0.00174	0.00459		12.3	0.000451	0.00158	0.00518	0.00225	0.00323	0.00312	0.000868	0.00176	0.000381
16.6	0.00237	0.00178	0.00455		12.4	0.000509	0.00178	0.00432	0.00234	0.00327	0.00317	0.000807	0.0016	0.000252
16.8	0.00237	0.00184	0.00453		12.6	0.000576	0.00201	0.00358	0.00243	0.00335	0.00326	0.000771	0.00147	0.00017
17	0.00237	0.00193	0.00451		12.7	0.000653	0.00229	0.00299	0.00253	0.00347	0.00339	0.000762	0.00139	0.00012
17.2	0.00239	0.00204	0.00453		12.9	0.000743	0.00261	0.00253	0.00262	0.00365	0.00356	0.00078	0.00134	8.92e-05
17.4	0.00242	0.0022	0.00459		13	0.000849	0.00299	0.0022	0.00272	0.00389	0.0038	0.000832	0.00133	7.07e-05
17.6	0.00249	0.00239	0.00471		13.2	0.000973	0.00343	0.00199	0.00281	0.00422	0.0041	0.000927	0.00137	6.11e-05
17.8	0.00259	0.00264	0.00493		13.3	0.00112	0.00394	0.00189	0.0029	0.00465	0.00449	0.00108	0.00147	5.84e-05
18	0.00274	0.00295	0.00526		13.5	0.00129	0.00453	0.00189	0.00297	0.00522	0.00499	0.00133	0.00166	6.23e-05
18.2	0.00296	0.00334	0.00576		13.6	0.0015	0.00522	0.00203	0.00303	0.00596	0.00561	0.00172	0.00196	7.52e-05
18.4	0.00327	0.00382	0.00645		13.8	0.00175	0.00603	0.00232	0.00307	0.00693	0.00641	0.00236	0.00246	0.000104
18.6	0.00369	0.00442	0.00743		13.9	0.00204	0.00699	0.00287	0.00311	0.00821	0.00741	0.00341	0.00328	0.000167
18.8	0.00424	0.00516	0.0088		14.1	0.0024	0.00816	0.00383	0.00313	0.00987	0.00868	0.00525	0.00468	0.000314
19	0.00497	0.00608	0.0107		14.2	0.00282	0.00959	0.00553	0.00315	0.0121	0.0103	0.00857	0.00717	0.000693
19.2	0.00592	0.00721	0.0135		14.4	0.00332	0.0114	0.00864	0.00317	0.015	0.0124	0.0149	0.0118	0.00181
19.4	0.00714	0.00859	0.0174		14.5	0.0039	0.0137	0.0146	0.00319	0.0188	0.015	0.0275	0.0211	0.00557
19.6	0.00869	0.0103	0.0233		14.7	0.00458	0.0168	0.0267	0.00322	0.0238	0.0185	0.0538	0.0406	0.0203
19.8	0.0107	0.0123	0.0323		14.8	0.00537	0.0208	0.0527	0.00326	0.0304	0.0229	0.112	0.0848	0.0877
20	0.0263	0.0297	0.0926		15	0.0125	0.0525	0.223	0.00662	0.0785	0.0577	0.496	0.384	0.888
